# Supplementary material for: Are there researcher allegiance effects in diagnostic validation studies of the PHQ-9? A systematic review and meta-analysis
Source: PubMed Central journal article supplement (PMC5640143; doi:10.1136/bmjopen-2016-015247), 2017-09-29
Supplement: bmjopen-2016-015247.draft_revisions.pdf [file bmjopen-2016-015247.draft_revisions.pdf]

# BMJ Open

BMJ Open is committed to open peer review. As part of this commitment we make the peer review history of every article we publish publicly available.

When an article is published we post the peer reviewers' comments and the authors' responses online. We also post the versions of the paper that were used during peer review. These are the versions that the peer review comments apply to.

The versions of the paper that follow are the versions that were submitted during the peer review process. They are not the versions of record or the final published versions. They should not be cited or distributed as the published version of this manuscript.

BMJ Open is an open access journal and the full, final, typeset and author-corrected version of record of the manuscript is available on our site with no access controls, subscription charges or pay-per-view fees (<http://bmjopen.bmj.com>).

If you have any questions on BMJ Open's open peer review process please email [info.bmjopen@bmj.com](mailto:info.bmjopen@bmj.com)

# BMJ Open

## Are there researcher allegiance effects in diagnostic validation studies of the PHQ-9? A systematic review and meta-analysis

|                                 |                                                                                                                                                                                                                                                                                              |
|---------------------------------|----------------------------------------------------------------------------------------------------------------------------------------------------------------------------------------------------------------------------------------------------------------------------------------------|
| Journal:                        | <i>BMJ Open</i>                                                                                                                                                                                                                                                                              |
| Manuscript ID                   | bmjopen-2016-015247                                                                                                                                                                                                                                                                          |
| Article Type:                   | Research                                                                                                                                                                                                                                                                                     |
| Date Submitted by the Author:   | 23-Nov-2016                                                                                                                                                                                                                                                                                  |
| Complete List of Authors:       | Manea, Laura; University of York, Health Sciences<br>Boehnke, Jan; University of York<br>Gilbody, Simon; The University of York, Department of Health Sciences<br>Moriarty, Andrew; University of York, Health Sciences<br>McMillan, Dean; University of York, Department of Health Sciences |
| <b>Primary Subject Heading</b>: | Mental health                                                                                                                                                                                                                                                                                |
| Secondary Subject Heading:      | Diagnostics                                                                                                                                                                                                                                                                                  |
| Keywords:                       | Depression & mood disorders < PSYCHIATRY, Screening, PHQ-9, diagnostic meta-analysis, allegiance effect                                                                                                                                                                                      |
|                                 |                                                                                                                                                                                                                                                                                              |

SCHOLARONE™  
Manuscripts

1  
2  
3  
4  
5  
6  
7  
8  
9  
10  
11  
12  
13  
14  
15  
16  
17  
18  
19  
20  
21  
22  
23  
24  
25  
26  
27  
28  
29  
30  
31  
32  
33  
34  
35  
36  
37  
38  
39  
40  
41  
42  
43  
44  
45  
46  
47  
48  
49  
50  
51  
52  
53  
54  
55  
56  
57  
58  
59  
60

1 **Are there researcher allegiance effects in diagnostic validation studies of the PHQ-9? A**  
2 **systematic review and meta-analysis**

3  
4 Laura Manea MMedSci MRCPsych\*, Jan Boehnke PhD, Simon Gilbody DPhil FRCPsych  
5 FRSA, Andrew Moriarty MSc, Dean McMillan PhD

6  
7 \*Corresponding Author

8 Hull York Medical School and Department of Health Sciences, ARRC Building, University  
9 of York, YO10 5DD

10 Email: [laura.manea@york.ac.uk](mailto:laura.manea@york.ac.uk)

1  
2  
3 25 **Abstract**  
4

5 26 **Objectives** To investigate whether an authorship effect is found that leads to better  
6  
7 27 performance in studies conducted by the original developers of the PHQ-9 (non-independent  
8  
9 28 studies).

10  
11 29 **Design** Systematic review with random effects bivariate diagnostic meta-analysis. Search  
12  
13 30 strategies included electronic databases, examination of reference lists, and forward citation  
14  
15 31 searches.

16  
17 32 **Inclusion criteria** Included studies provided sufficient data to calculate the diagnostic  
18  
19 33 accuracy of the PHQ-9 against a gold standard diagnosis of major depression using the  
20  
21 34 algorithm or the summed item scoring method at cut-off point 10.

22  
23 35 **Data extraction** Descriptive information, methodological quality criteria, and 2×2  
24  
25 36 contingency tables.

26  
27 37 **Results**  
28

29  
30 38 Seven non-independent and twenty independent studies reported the diagnostic performance  
31  
32 39 of the PHQ-9 using the algorithm scoring method. Pooled diagnostic odds ratio (DOR) for  
33  
34 40 the first group was 64.40, and 15.05 for independent studies group. The allegiance status was  
35  
36 41 a significant predictor of DOR variation ( $p < 0.0001$ ).

37  
38 42 Five non-independent studies and twenty-six independent studies reported the performance of  
39  
40 43 the PHQ-9 at recommended cut-off point of 10. Pooled DOR for the non-independent group  
41  
42 44 was 49.31, and 24.96 for the independent studies. The allegiance status was a significant  
43  
44 45 predictor of DOR variation ( $P = 0.015$ ).

45  
46 46 Some potential alternative explanations for the observed authorship effect including  
47  
48 47 differences in study characteristics and quality were found, though it is not clear how some of  
49  
50 48 them account for the observed differences  
51

52  
53 50 **Conclusions**  
54

55  
56 51 Non-independent studies reported better performance of the PHQ-9. Allegiance status was  
57  
58 52 predictive of variation in the DOR. Based on the observed differences between independent  
59  
60

1  
2  
3 53 and non-independent studies we were unable to conclude or exclude that allegiance effects  
4 54 are present in studies examining the diagnostic performance of the PHQ-9. This study  
5  
6 55 highlights the need for future meta-analyses of diagnostic validation studies of psychological  
7  
8 56 measures to evaluate the impact of researcher allegiance in the primary studies.  
9  
10  
11 57  
12  
13 58  
14

15 59 **Strengths and limitations of this study**  
16  
17  
18 60  
19

- 20 61 • An original study—the first meta-analysis of diagnostic validation studies of  
21 62 psychological measures to evaluate the impact of researcher allegiance.  
22  
23 63 • Using rigorous methodology—strict inclusion/exclusion and quality assessment  
24 64 criteria.  
25  
26 65 • We found that the allegiance effect was a significant predictor of the variation of the  
27 66 diagnostic odds ratio in the meta-regression analysis.  
28  
29  
30 67 • Substantial variability observed in methodological quality of included studies.  
31  
32 68 • Based on the observed methodological differences between the independent and non-  
33 69 independent studies we were unable to conclude or exclude that allegiance effects are  
34  
35 70 present in studies examining the diagnostic performance of the PHQ-9.  
36  
37 71  
38  
39 72  
40  
41 73  
42  
43  
44 74  
45  
46 75  
47  
48  
49 76  
50  
51 77  
52  
53  
54 78  
55  
56 79  
57  
58  
59  
60

1  
2  
3 80 Research on allegiance effects has a long tradition in psychotherapy research. In this context  
4 81 *allegiance* describes the phenomenon that researchers and clinicians who developed a  
5  
6 82 treatment approach or are for other reasons invested in it tend to find larger effect sizes in  
7  
8 83 favour of their treatment than for comparison groups. (Luborsky et al., 2006) This finding has  
9  
10 84 been extensively replicated (Dragioti, Dimoliatis, & Evangelou, 2015; Munder, Brüttsch,  
11  
12 85 Leonhart, Gerger, & Barth, 2013) and is also robust when the quality of research is controlled  
13  
14 86 for. Researcher allegiance is subject of on-going debates about the design of efficacy studies  
15  
16 87 as well as implications for policy. (Dragioti et al., 2015; McLeod, 2010; Winter, 2010)  
17  
18 88 Researcher allegiance is also discussed widely in the literature on experimental as well as  
19  
20 89 evaluation research. (Staines & Cleland, 2007) Since the motivational underpinnings of  
21  
22 90 allegiance effects are potentially far more ingrained into human behaviour and decision  
23  
24 91 making than previously thought (e.g., (Markman & Hirt, 2002)), they may occur commonly  
25  
26 92 in clinical research in general.

27  
28 93 Although it has been suggested that allegiance effects may play a role in the validation of  
29  
30 94 psychological screening and case-finding tools (e.g., O'Shea et al., in press), systematic  
31  
32 95 evaluations of this hypothesis are rare and studies that acknowledge potential allegiance  
33  
34 96 effects in such studies mainly come from forensic psychology and psychiatry backgrounds.  
35  
36 97 (Blair, Marcus, & Boccaccini, 2008; Lilienfeld & Jones, 2008; Singh, Grann, & Fazel, 2013;  
37  
38 98 Walters, 2009) Diagnostic validation studies are geared at establishing the sensitivity and  
39  
40 99 specificity of a screening or case finding tool, which is used in practice to differentiate cases  
41  
42 100 from non-cases or to decide about whether further assessment or treatment is indicated or will  
43  
44 101 be offered An allegiance effect in such studies would be seen in systematically higher  
45  
46 102 sensitivities or specificities if the original author(s) is(are) part of the team of such a study.  
47  
48 103 Such a bias would have a deleterious affect on practice through promising over-optimistic  
49  
50 104 accuracy of the screening or case finding tool or in evaluating the cost-effectiveness of the  
51  
52 105 measure in a screening or case-finding context.

53  
54 106 The depression module of the Patient Health Questionnaire (PHQ-9) is a widely used  
55  
56 107 depression-screening instrument in non-psychiatric settings. The PHQ-9 was developed by a  
57  
58 108 team of researchers, with its development underwritten by an educational grant from Pfizer  
59  
60 109 US Pharmaceuticals. (Kroenke, Spitzer, & Williams, 2001) The PHQ-9 can be scored using  
110  
111 110 different methods, including an algorithm based on DSM-IV criteria and a cut-off based on  
112  
113 111 summed-item scores. The psychometric properties of these two approaches have been  
114  
115 112 summarised in two recently published meta-analyses. (Manea, Gilbody, & McMillan, 2015;

1  
2  
3 113 Moriarty, Gilbody, McMillan, & Manea, 2015)The goal of the current review is to  
4 114 investigate, based on an established database of PHQ-9 diagnostic validation studies (Manea  
5 115 et al., 2015; Moriarty et al., 2015), whether an allegiance effect is found that leads to an  
6 116 increased sensitivity and specificity in studies that were conducted by researchers closely  
7 117 connected to the original developers of the instrument.

## 118 METHODS

### 119 *Study Selection*

120 Similar search strategies were used in both systematic reviews. (For full details please see  
121 Manea et al. (2014) and Moriarty et al. (2015)). Embase, MEDLine and PSYCHInfo were  
122 searched from 1999 (when the PHQ-9 was first developed) to August 2013 (Manea et al.,  
123 2015) and September 2013 (Moriarty et al., 2015) respectively, using the terms “PHQ-9”,  
124 “PHQ”, “PHQ\$” and “patient health questionnaire”. The reference lists of studies fitting the  
125 inclusion criteria were manually searched and a reverse citation search in Web of Science  
126 was performed. Authors of unpublished studies were contacted and conference abstracts were  
127 reviewed in an attempt to minimise publication bias.

128 The following inclusion-exclusion criteria were used:

129 *Population:* Adult population. *Instrument:* Studies that used the PHQ-9. *Comparison*  
130 *(reference standard):* The accuracy of the PHQ-9 had to be assessed against a recognised  
131 gold-standard instrument for the diagnosis of either Diagnostic and Statistical Manual (DSM)  
132 or International Classification of Disease (ICD) criteria for major depression. Studies were  
133 included if the diagnoses were made using a standardised diagnostic structured interview  
134 schedule (e.g. Mini International Neuropsychiatric Interview (MINI), Structured Clinical  
135 Interview for DSM Disorders (SCID)). Unguided clinician diagnoses with no reference to a  
136 standard structured diagnostic schedule or comparisons of the PHQ-9 with other self-report  
137 measures were excluded. Studies were also excluded if the target diagnosis was not major  
138 depressive disorder (MDD, e.g. any depressive disorder). *Outcome:* Studies had to report  
139 sufficient information to calculate a 2\*2 contingency table for the algorithm or the  
140 recommended cut-off point 10. *Study design:* Any design. *Additional criterion:* We avoided  
141 double counting of evidence by ensuring that only one study of those that reported  
142 overlapping datasets in different journals were included in the meta-analysis. Citations with

1  
2  
3 143 overlapping samples were examined to establish whether they contained information relevant  
4 144 to the research question that was not contained in the included report.

5  
6  
7 145 *Quality assessment*

8  
9  
10 146 Quality assessment was performed using the QUADAS-2 tool, a tool for evaluating the risk  
11 147 of bias and applicability of primary diagnostic accuracy studies when conducting diagnostic  
12 148 systematic reviews. (Whiting et al., 2011) It covers the areas of: patient selection, index test,  
13 149 reference standard and flow and timing. (Mann, Hewitt, & Gilbody, 2009) This tool was  
14 150 adapted for the two reviews and quality assessments were carried out by two independent  
15 151 reviewers for all studies included in the reviews.

16  
17  
18  
19  
20 152 *Data synthesis and statistical analysis*

21  
22  
23 153 We constructed 2x2 tables for cut-off point 10 (Moriarty et al., 2015) and the algorithm  
24 154 scoring method (Manea et al., 2015) Pooled estimates of sensitivity, specificity,  
25 155 positive/negative likelihood ratios, and diagnostic odds ratios were calculated using random  
26 156 effects bivariate meta-analysis. (Reitsma et al., 2005) Summary Receiver Operator  
27 157 Characteristic curves (sROC) were constructed using the bivariate model to produce a 95%  
28 158 confidence ellipse within ROC space. (Walter, 2002) Each data point in the summary ROC  
29 159 space represents a separate study, unlike a traditional ROC plot, which explores the effect of  
30 160 varying thresholds on sensitivity and specificity in a single study.

31  
32  
33 161 We undertook a meta-regression analysis of logit diagnostic odds ratio using research  
34 162 allegiance as covariate in the meta-regression model. (Lijmer, Bossuyt, & Heisterkamp,  
35 163 2002; S. G. Thompson & Higgins, 2002) Analyses were conducted using STATA version 12,  
36 164 with the metan, metandi and metareg user-written commands.

37  
38  
39  
40  
41 165 *Allegiance Rating*

42  
43  
44 166 We rated authorship on a paper of any of the developers of the PHQ-9 - Kurt Kroenke, MD,  
45 167 Robert L Spitzer, MD, and Janet B W Williams – as an indicator of potential allegiance. We  
46 168 also rated as evidence of allegiance as acknowledged collaborations with the developers of  
47 169 the PHQ-9, even if they were not listed as co-authors or if the authors acknowledged funding  
48 170 from Pfizer to conduct the study.

49  
50  
51  
52  
53  
54  
55  
56 171



1  
2  
3 172 RESULTS  
4  
5  
6 173  
7

8 174 **Overview of included studies**  
9

10 175 31 studies reported the diagnostic properties of the PHQ-9 at cut-off point 10 and were  
11 included in this analysis (Moriarty et al., 2015) 27 studies were included in the algorithm  
12 review (Manea et al., 2015). The study selection flowcharts can be found in Appendix 1  
13 (figures 1 and 2). The characteristics of these studies are reported in tables 1 and 2 and the  
14 results of the methodological assessment are presented in tables 3 and 4.  
15  
16  
17  
18

19 180 **Algorithm scoring method**  
20  
21  
22 181

23  
24 182 Descriptive characteristics  
25  
26

27 183 The descriptive characteristics of the included studies are presented in table 1. Seven  
28 individual studies that reported the diagnostic performance of the PHQ-9 using the algorithm  
29 scoring method were co-authored by the original developers of the PHQ-9 (Diez-Quevedo,  
30 Rangil, Sanchez-Planell, Kroenke, & Spitzer, n.d.; Gräfe, Zipfel, Herzog, & Löwe, 2004;  
31 Löwe et al., 2004; Spitzer, Kroenke, & Williams, 1999; Thekkumpurath et al., 2011),  
32 specifically acknowledged one of the developers and support by an educational grant from  
33 Pfizer US (Muramatsu et al., 2007), or were co-authored by the first author of a previous  
34 study that had also been co-authored by one of the developers (Navinés et al., 2012). Twenty  
35 independent studies reported the diagnostic properties of the PHQ-9 using the algorithm  
36 scoring method.  
37  
38  
39  
40  
41  
42  
43  
44  
45  
46

47 194 Three (43%, 3/7) of the non-independent studies were conducted exclusively in hospital  
48 settings (Diez-Quevedo et al., n.d.; Navinés et al., 2012; Thekkumpurath et al., 2011). The  
49 remaining four studies (67%, 4/7) were conducted in different settings or non-exclusively  
50 hospital settings: one in primary care (Spitzer et al., 1999) and three in mixed settings:  
51 psycho-somatic walk in clinics and family practices (Gräfe et al., 2004)<sup>1</sup>, outpatient clinics  
52  
53  
54  
55

56  
57 <sup>1</sup> This study provided separate estimates for the two settings in which it was conducted; therefore  
58 separate psychometric estimates were generated for each sample for both algorithm scoring method and  
59 summed items scoring method at cut-off point 10 (see below).  
60

1  
2  
3 199 and family practices (Löwe et al., 2004) and primary care and hospital settings (Muramatsu et  
4 al., 2007). In the independent group, thirteen (65%, 13/20) studies were conducted in  
5 200  
6 201 hospital settings (Eack, Greeno, & Lee, 2006; Fann et al., n.d.; Gelaye et al., 2013; Hyphantis  
7  
8 202 et al., 2011; Inagaki et al.; Khamseh et al., 2011; Persoons, Luyckx, Desloovere,  
9  
10 203 Vandenberghe, & Fischler, n.d.; Picardi et al., 2005; Stafford, Berk, & Jackson, 2007;  
11  
12 204 Thombs, Ziegelstein, & Whooley, 2008; A. W. Thompson et al., 2011; Turner et al., 2012;  
13  
14 205 van Steenbergen-Weijnenburg et al., 2010). Of the remaining seven studies, six were  
15  
16 206 conducted in primary care settings (Arroll et al., 2010; Ayalon, Goldfracht, & Bech, 2010;  
17  
18 207 Henkel et al., 2004; Lamers et al., 2008; Lotrakul, Sumrithe, & Saipanish, 2008; Zuithoff et  
19  
20 208 al., 2010) and one in a community sample (Gjerdingen, Crow, McGovern, Miner, & Center,  
21  
22 209 2009).

23  
24 210 In both groups (independent and non-independent studies), the majority of studies validated a  
25  
26 211 translated version of the PHQ-9. Two of the studies authored by developers (28%, 2/7)  
27  
28 212 (Spitzer et al., 1999; Thekkumpurath et al., 2011), and eight (40%, 8/20) independent studies  
29  
30 213 (Arroll et al., 2010; Eack et al., 2006; Fann et al., n.d.; Gjerdingen et al., 2009; Stafford et al.,  
31  
32 214 2007; Thombs et al., 2008; A. W. Thompson et al., 2011; Turner et al., 2012) were conducted  
33  
34 215 in English.

35  
36 216 The mean prevalence of major depressive disorder in the group of studies co-authored by  
37  
38 217 PHQ-9 developers was 13.4 (range 6.1% - 29.2%); in the independent group it was 15.5%  
39  
40 218 (range 3.9% - 32.4%). The mean age of patients in the PHQ-9 developers group was 45.75;  
41  
42 219 all but one study had a mean age in the range of 40 to 50 years. In the independent group the  
43  
44 220 mean age was 54.6 (range 29.3 – 75.0), with almost half (8) of the studies reporting a mean  
45  
46 221 age of over 60. The percentage of females in the PHQ-9 developers was 56.8% (range 28.6%  
47  
48 222 - 67.8%) and in the independent group was 59.1 (18% -100%).

49  
50  
51  
52  
53  
54  
55  
56  
57  
58  
59  
60

223  
224 All of the non-independent studies used a self-reported PHQ-9, whereas in 7 independent  
225  
226 225 studies (30%, 6/20) the PHQ-9 was administered by a researcher (Ayalon et al., 2010; Fann et  
227  
228 226 al., n.d.; Gelaye et al., 2013; Gjerdingen et al., 2009; Hyphantis et al., 2011; Inagaki et al.).  
229  
230 227 Apart from Muramatsu et al. (2007) all of the non-independent studies used the SCID as a  
231  
232 228 gold standard; the independent studies used a wider range of gold standards including SCAN,  
233  
234 229 CIDI, MINI, and C-DIS, though the SCID was also frequently used by the independent  
235  
236 230 studies as well (45%, 9/20 studies).

1  
2  
3 231 Four out of the seven non-independent studies (57%) did not include a conflict of interests  
4 232 statement (Diez-Quevedo et al., n.d.; Gräfe et al., 2004; Muramatsu et al., 2007; Spitzer et al.,  
5 233 1999). Also, four (57%) of the non-independent studies acknowledged funding from Pfizer  
6 234 (Gräfe et al., 2004; Löwe et al., 2004; Muramatsu et al., 2007; Spitzer et al., 1999). Only one  
7 235 study (Muramatsu et al., 2007) acknowledged the collaboration with one of the developers of  
8 236 the PHQ-9.

9  
10  
11  
12  
13 237 Of the independent studies, twelve (60%) did not include a conflict of interests statement  
14 238 (Eack et al., 2006; Fann et al., n.d.; Gelaye et al., 2013; Gjerdingen et al., 2009; Henkel et al.,  
15 239 n.d.; Hyphantis et al., 2011; Lamers et al., 2008; Lotrakul et al., 2008; Persoons et al., n.d.;  
16 240 Picardi et al., 2005; Stafford et al., 2007; A. W. Thompson et al., 2011). It appears that newer  
17 241 studies were more likely to include a conflict of interest statement, which may reflect a recent  
18 242 change in reporting. Funding was acknowledged by most studies (18/20) and most received  
19 243 funding from academic or/and health research institutions. Two studies received funding  
20 244 from pharmaceutical companies – Lundbeck (Ayalon et al., 2010) and Pfizer (Persoons et al.,  
21 245 n.d.) and one study acknowledged that Pfizer Italia provided the Italian version of PHQ-9 and  
22 246 gave the authors permission to use it (Picardi et al., 2005).

23  
24  
25  
26  
27  
28  
29  
30  
31 247 Diagnostic test accuracy

32  
33 248 Pooled sensitivity and specificity was calculated separately for the independent and non-  
34 249 independent studies. Pooled sensitivity for the non-independent studies of the PHQ-9 was  
35 250 0.77 (95% CI = 0.70 – 0.84), pooled specificity was 0.94 (95% CI = 0.90 – 0.97) and the  
36 251 pooled diagnostic odds ratio was 64.40 (95% CI = 34.15 – 121.43). Heterogeneity was high  
37 252 ( $I^2 = 78.9\%$ ). Figure 1 represents the summary ROCs for this set of studies.  
38  
39  
40  
41  
42  
43  
44  
45  
46  
47  
48  
49  
50  
51  
52  
53  
54  
55  
56  
57  
58  
59  
60

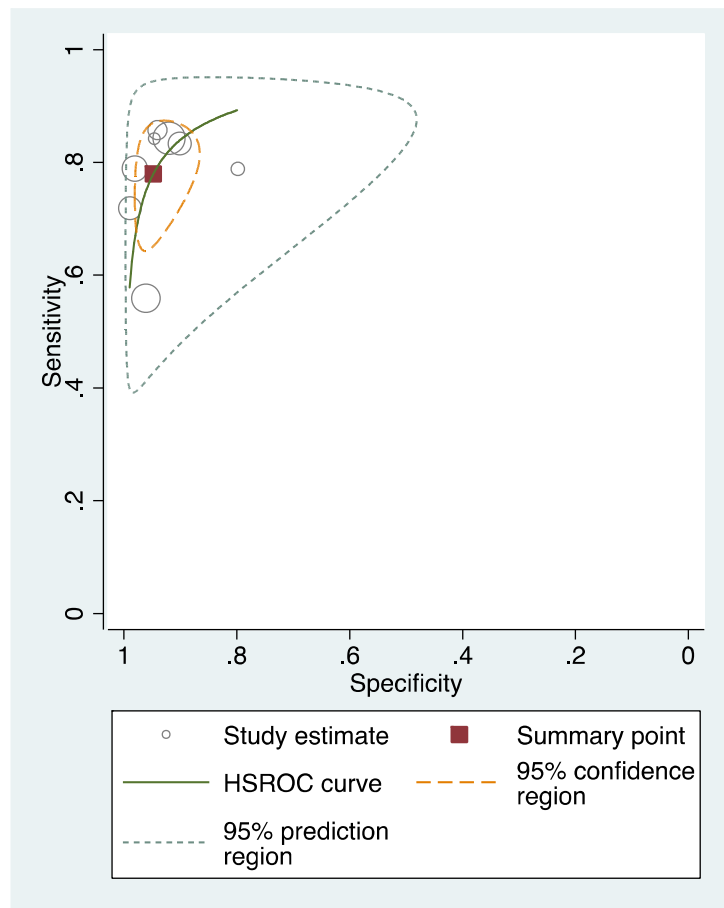

253

254 Figure 1. PHQ-9 algorithm scoring method summary ROC plot of diagnosis of major  
 255 depressive disorder in non-independent studies. Pooled sensitivity and specificity using a bi-  
 256 variate meta-analysis.

257

258 Pooled sensitivity for the independent studies was lower compared to the developer authored  
 259 studies group at 0.48 (95% CI = 0.41 – 0.91); whereas pooled specificity was the same at  
 260 0.94 (95% CI = 0.91 – 0.95). The pooled diagnostic odds ratio was approximately four times  
 261 lower at 15.05 (95% CI = 11.03 – 20.52) (see figure 2 or sROC). Heterogeneity was  
 262 substantial at  $I^2 = 68.1\%$ .

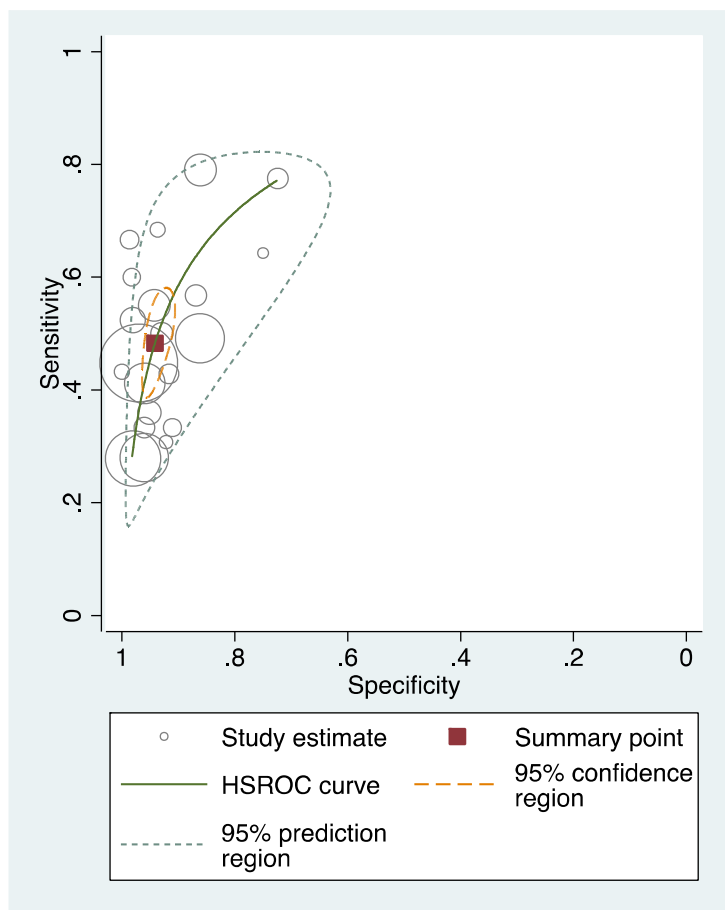

263

264 Figure 2. PHQ-9 algorithm scoring method summary ROC plot of diagnosis of major  
 265 depressive disorder in independent studies. Pooled sensitivity and specificity using a bi-  
 266 variate meta-analysis.

267

268

269 The meta-regression analysis for algorithm studies with independent status as the predictor of  
 270 the diagnostic odds ratio showed that independent status was a significant predictor of the  
 271 diagnostic odds ratio ( $p < 0.0001$ ) and explained a substantial amount of the observed  
 272 heterogeneity (51.54%).

273

274 Quality assessment

1  
2  
3 275 The results of the quality assessment using QUADAS-2 are given in table 3 for the studies  
4 276 reporting on the diagnostic performance of the algorithm scoring method. In the patient  
5 277 selection domain, more of the independent studies (65%, 13/20) than the non-independent  
6 278 (29%, 2/7) met the criterion for consecutive referrals. There were no marked differences on  
7  
8 279 the other two criteria in this domain (avoid case-control design, avoid inappropriate  
9 280 exclusions). In the index test domain, the proportion of studies reporting that the PHQ-9 was  
10 281 conducted blind to the reference test was comparable between the two groups. There were  
11 282 differences in this domain for those studies using a translated version of the test. All non-  
12 283 English non-independent studies (5/5) used an appropriately translated version of the PHQ-9;  
13 284 whereas just over a half of the independent studies reported this (55%, 6/11). However, the  
14 285 majority of both sets of studies did not report details of psychometric properties of the  
15 286 translated version. For the reference test domain, nearly all studies in both groups were rated  
16 287 as using a reference test that would correctly classify the condition. While most studies  
17 288 conducted by the developers of the PHQ-9 reported that the reference test was interpreted  
18 289 blind to the PHQ-9 score (86%, 6/7), this was reported in only 60% (12/20) of the  
19 290 independent studies.

20  
21 291 The two sets of studies that used translated versions of the reference test were broadly  
22 292 comparable. There was a slight indication that the non-independent studies were more likely  
23 293 to use an appropriately translated version of the reference test and report data on the  
24 294 psychometric properties of the translated version, though the numbers for the translated  
25 295 comparison are very low. There were, however, some more notable differences on the flow  
26 296 and timing domain. Most of the studies conducted by the developers ensured that the time  
27 297 between the index and reference test was under two weeks (86%, 6/7) in comparison to 70%  
28 298 (14/20) of the independent studies. More non-independent studies met the criterion for 'all  
29 299 participants included in the analysis' (57%, 4/7) than the independent studies (25%).

30  
31  
32  
33  
34  
35  
36  
37  
38  
39  
40  
41  
42  
43  
44  
45  
46 300

#### 47 301 **Summed items scoring method (cut-off point 10)**

48  
49  
50 302

#### 51 303 Descriptive characteristics

52  
53  
54 304 Table 2 presents the sample characteristics of the thirty-one PHQ-9 validation studies that  
55 305 reported the psychometric properties of the PHQ-9 at cut-off point 10. Five of these studies  
56  
57  
58  
59  
60

1  
2  
3 306 were co-authored by the original developers of the instrument or acknowledged collaboration  
4 307 (Gräfe et al., 2004; Kroenke et al., 2001; Thekkumpurath et al., 2011; Williams et al., 2005)  
5 308 or were co-authored by the first author of a previous study that had also been co-authored by  
6 309 one of the developers (Navinés et al., 2012). Twenty-six studies were conducted by  
7 310 independent researchers.  
8  
9  
10  
11

12 311  
13  
14 312 Three (60%, 3/5) of the non-independent studies (Navinés et al., 2012; Thekkumpurath et al.,  
15 313 2011; Williams et al., 2005) and eleven independent studies (42%, 11/26) (Chagas et al.,  
16 314 2013; Elderon, Smolderen, Na, & Whooley, 2011; Fann et al., n.d.; Gelaye et al., 2013;  
17 315 Hyphantis et al., 2011; Khamseh et al., 2011; Rooney et al., 2013; Stafford et al., 2007;  
18 316 Thombs et al., 2008; Watnick, Wang, Demadura, & Ganzini, 2005; Zhang et al., 2013) were  
19 317 conducted in hospital settings.  
20  
21  
22  
23  
24  
25

26 318  
27  
28 319 Three (60%, 3/5) non-independent studies (Kroenke et al., 2001; Thekkumpurath et al., 2011;  
29 320 Williams et al., 2005) and thirteen independent studies (13/26) (Adewuya, Ola, & Afolabi,  
30 321 2006; Arroll et al., 2010; Elderon et al., 2011; Fann et al., n.d.; Fine et al., 2013; Gilbody,  
31 322 Richards, Brealey, & Hewitt, 2007; Gjerdingen et al., 2009; Phelan et al., 2010; Rooney et  
32 323 al., 2013; Sidebottom, Harrison, Godecker, & Kim, 2012; Stafford et al., 2007; Thombs et al.,  
33 324 2008; Watnick et al., 2005), were conducted in English.  
34  
35  
36  
37  
38  
39

40 325  
41 326 The mean prevalence of major depressive disorder in the group of studies authored by PHQ-9  
42 327 developers was 13.2% (range 6.1% - 33.5%) and in the independent group was 16.1% (range  
43 328 2.5% - 43.2%). The mean age of patients in the PHQ-9 developers group studies was 48.1  
44 329 (range 41.9 -61.0) and in the 26 independent studies that reported these data was 49.1 (range  
45 330 23.0 – 78.0). The percentage of females in the PHQ-9 developers studies that reported these  
46 331 data (Gräfe et al., 2004; Kroenke et al., 2001; Navinés et al., 2012; Thekkumpurath et al.,  
47 332 2011) was 56.3% (range 28.6% – 67.8%) and in the independent group was 64.9 % (range  
48 333 12% -100%).  
49  
50  
51  
52  
53  
54

55 334  
56  
57  
58  
59  
60



1  
2  
3 335 Three of the non-independent studies used the self-reported mode of administration and two  
4 336 of them did not specify how the PHQ-9 was administered. In 9 independent studies (34%,  
5 337 9/26) the PHQ-9 was administered by the researcher (de Lima Osório, Vilela Mendes,  
6 338 Crippa, & Loureiro, 2009; Fann et al., n.d.; Fine et al., 2013; Gelaye et al., 2013; Gjerdingen  
7 339 et al., 2009; Hyphantis et al., 2011; Patel et al., 2008; Phelan et al., 2010; Sidebottom et al.,  
8 340 2012). All studies authored by developers used SCID as a gold standard; the independent  
9 341 studies used a wider range of gold standards including SCAN, CIDI, MINI, CIS-R, C-DIS,  
10 342 though the SCID was used in half of the studies (50%, 13/26 studies).

11 343 Three non-independent studies (60%) did not include a conflict of interests statement (Gräfe  
12 344 et al., 2004; Kroenke et al., 2001; Williams et al., 2005). Two of these studies (Gräfe et al.,  
13 345 2004; Kroenke et al., 2001) acknowledged funding from Pfizer. None of the non-independent  
14 346 studies acknowledged collaboration or authorship of one of the developers of the PHQ-9.

15 347 Of the independent studies, thirteen (42%) did not include a conflict of interests statement  
16 348 (Adewuya et al., 2006; Arroll et al., 2010; Azah et al., 2005; de Lima Osório et al., 2009;  
17 349 Fann et al., n.d.; Gelaye et al., 2013; Gjerdingen et al., 2009; Hyphantis et al., 2011; Liu et  
18 350 al., 2011; Lotrakul et al., 2008; Stafford et al., 2007; Watnick et al., 2005; Wittkamp et al.,  
19 351 2009). Similar to the algorithm studies, the newer studies were more likely to include a  
20 352 conflict of interest statement. Funding was acknowledged by most studies (27/31) and most  
21 353 received funding from academic or/and health research institutions. One study (Gilbody et  
22 354 al., 2007) acknowledged that the last author involved in the development of one of the  
23 355 instruments (CORE-OM), 'but does not gain financially from its use'. One study (Elderon et  
24 356 al., 2011) acknowledged funding from industry, AHA Pharmaceuticals Roundtable, but stated  
25 357 that 'the funding organisations had no role in the design or conduct of the study, collection,  
26 358 management, analysis or interpretation of data; or preparation, review or approval of the  
27 359 manuscript. Fine et al., 2013 disclosed that the last author had financial and consulting  
28 360 interests (Pfizer was not cited as one of them).

29 361

### 30 362 Diagnostic test accuracy

31 363 Pooled sensitivity for the studies linked to the developers of the PHQ-9 was 0.87 (95% CI =  
32 364 0.77 – 0.93), pooled specificity was 0.87 (95% CI = 0.76 – 0.94) and the pooled diagnostic  
33 365 odds ratio was 49.31 (95% CI = 25.74 – 94.48) – see table 5. Heterogeneity was moderate ( $I^2$   
34 366 = 55.1%). Figure 4 represents the summary ROCs for this group.



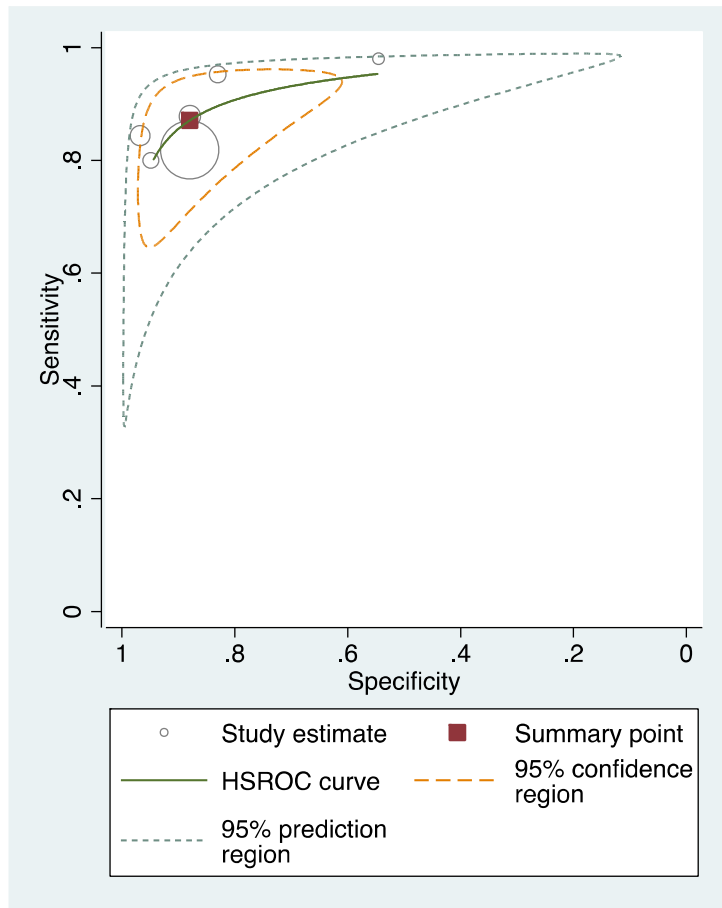

367

368 Figure 3. PHQ-9 summed items scoring method at cut-off point 10 summary ROC plot of  
 369 diagnosis of major depressive disorder in non-independent studies. Pooled sensitivity and  
 370 specificity using a bi-variate meta-analysis.

371

372 Pooled sensitivity for the independent studies was 0.76 (95% CI, 0.67 – 0.83), pooled  
 373 specificity was 0.88 95% CI (0.85 – 0.91) and the pooled diagnostic odds ratio was 24.96  
 374 (95% CI 14.81 – 42.08), approximately half that of the non-independent studies (table 5).  
 375 Heterogeneity was high at  $I^2 = 81.5\%$ . Figure 5 represents the summary ROCs for this group.

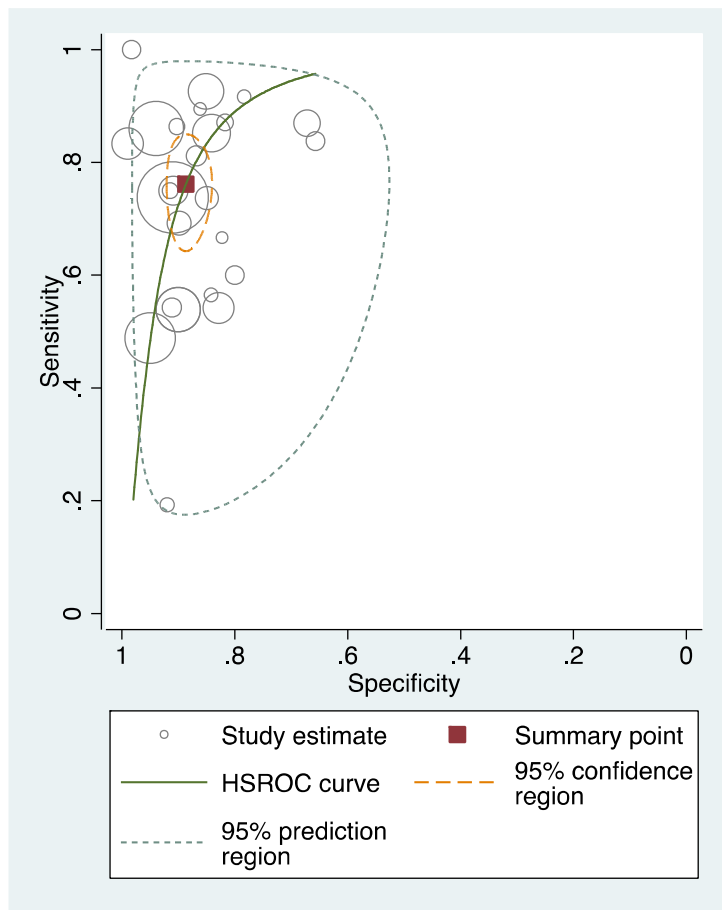

376

377 Figure 4. PHQ-9 summed items scoring method at cut-off point 10 summary ROC plot of  
 378 diagnosis of major depressive disorder in independent studies. Pooled sensitivity and  
 379 specificity using a bi-variate meta-analysis.

1  
2  
3 380 The meta-regression for the studies using a cut-off point of 10 with allegiance status of the  
4 381 predictor showed that allegiance status was a significant predictor of the diagnostic odds ratio  
5 382 (P = 0.015) and explained 18.95% of observed heterogeneity.  
6  
7  
8

9 383

10  
11 384 Quality assessment  
12

13  
14 385 The results of the quality assessment using the QUADAS-2 are given in table 4. For the  
15 386 patient selection domain, the two groups of studies were broadly comparable on two items  
16 387 (consecutive or random sample, avoid case-control design). However, all of the studies from  
17 388 the non-independent studies were rated as avoiding inappropriate exclusions (5/5) in contrast  
18 389 to 58% (15/26) of the independent studies.  
19  
20  
21  
22

23 390

24  
25 391 On the index test domain, there were a number of differences between the two groups of  
26 392 studies. More of the independent studies (81%, 21/26) reported that the PHQ-9 was  
27 393 interpreted blind to the reference test compared to 60% (3/5) of the studies conducted by the  
28 394 developers of the PHQ-9. All (5/5) of the studies from the PHQ-9 developers were rated as  
29 395 pre-specifying the threshold on the PHQ-9 compared to 73% (19/26) of the independent  
30 396 studies. The two sets of studies were broadly comparable in terms of two items from the  
31 397 reference test domain (correctly classify target condition, reference test interpreted blind).  
32 398 Only one of the studies from the developers of the PHQ-9 used a translated version of the  
33 399 index test or reference test, so it is not possible to comment on differences between the two  
34 400 sets of studies in terms of these items from the index or reference test domains. For the flow  
35 401 and timing domain, the two groups of studies were broadly comparable for two of the criteria  
36 402 (interval of two weeks or less, all participants receive same reference test). However, fewer  
37 403 than half of the independent studies met the criterion for 'all participants included in the  
38 404 analysis' (42%, 11/26); whereas all of the studies by the developers of the PHQ-9 met this  
39 405 criterion.  
40  
41  
42  
43  
44  
45  
46  
47  
48  
49

50 406

51  
52  
53 407 **Discussion**  
54

55  
56 408 This is to our knowledge the first systematic examination of a possible 'allegiance' or  
57 409 authorship effect in the validation of screening or case finding psychological instrument for a  
58  
59  
60

1  
2  
3 410 common mental health disorder. We reviewed diagnostic validation studies of the PHQ-9, a  
4 411 widely used depression screening-instrument. We found that non-independent studies  
5 412 reported higher sensitivity paired with similar specificity compared to studies conducted by  
6 413 independent researchers. When entered as a covariate in meta-regression analyses,  
7 414 independence status was predictive of variation in the DOR for both the algorithm scoring  
8 415 method and the summed-item scoring method at a cut-off point of 10.  
9  
10  
11  
12

13  
14 416

15  
16 417 Previous research has proposed several possible explanations for the allegiance effect (Blair  
17 418 et al., 2008; Lilienfeld & Jones, 2008; Singh et al., 2013). One possibility is the advertent bias  
18 419 that may serve to inflate the performance of a test when evaluated by those who have  
19 420 developed it. However, before concluding that the differences are due to this, it is important  
20 421 to explore and rule out alternative explanations. First, it is possible that any observed  
21 422 differences are a result of differences in study characteristics of the two sets of studies (e.g.,  
22 423 setting, clinical population). Secondly, differences in the methodological quality of the  
23 424 studies may also account for any differences. These possibilities are examined below.  
24  
25  
26  
27  
28  
29

30 425

31  
32  
33 426 Difference in study characteristics as potential alternative explanations  
34

35 427 The two sets of studies were broadly comparable in terms of gender and the prevalence of  
36 428 depression, so these variables are unlikely to offer an explanation for the differences. While  
37 429 there were some indications from both sets of comparisons that the PHQ-9 may have been  
38 430 researcher-administered more often in the independent studies, it is not immediately clear  
39 431 how this would lead to lowered diagnostic performance.  
40  
41  
42  
43

44 432

45  
46 433 The diagnostic meta-analyses of the PHQ-9 (Manea et al., 2015; Moriarty et al., 2015) have  
47 434 shown that the sensitivity and DOR of the PHQ-9 tends to be lower in hospital settings for  
48 435 both algorithm and summed-item scoring methods. Whilst the fact that proportionally more  
49 436 independent algorithm studies were conducted in secondary care could explain the lower  
50 437 sensitivity and DOR values in the algorithm studies, in the studies that reported the cut-off  
51 438 point of 10 this would not be the case as proportionally more studies authored by developers  
52 439 were conducted in hospital settings.  
53  
54  
55  
56  
57  
58  
59  
60

440

441 Similarly, differences in the proportions of studies using translated versions of the PHQ-9 are  
442 also unlikely to offer an obvious explanation of the difference in diagnostic performance,  
443 because in the algorithm set of studies more of the non-independent studies used a translated  
444 version of the test, but the proportions were in the opposite direction for the studies using a  
445 cut off of 10. A similar conclusion is also likely to apply to the age of the samples. There  
446 were more older adults studies in the independent than non-independent studies in the  
447 algorithm comparison. Depression could be more difficult to identify in older adults due to  
448 physical co-morbidities that may present with similar symptomatology to depression and  
449 could account for the lower diagnostic performance in the independent studies. However, the  
450 independent samples in the studies that reported the psychometric properties at cut-off point  
451 10 had younger samples than the non-independent studies, so this would not support this  
452 interpretation.

453

454 The SCID was used as the gold standard in nearly all of the non-independent studies. The fact  
455 that some independent studies used other gold standards could potentially explain the poorer  
456 psychometric properties of the PHQ-9 in these studies. The SCID is often regarded as the  
457 most valid of the available semi-structured interviews used in depression diagnostic validity  
458 studies as the reference standard. If we assume that this is the case and, furthermore, that the  
459 PHQ-9 is an accurate method of screening for depression, then the PHQ-9 may be more  
460 likely to agree with the SCID than other reference standards.

461

#### 462 Differences in methodological quality as potential alternative explanations

463 The quality of the studies was evaluated using the QUADAS-2. Although there were several  
464 potential methodological differences between the two groups of studies from the algorithm  
465 papers, not all of these offer obvious explanations of the observed differences and some are  
466 unlikely as explanations. For example, more of the studies from the developers of the PHQ-9  
467 ensured that the reference test was interpreted blind to the index test. This is unlikely to  
468 account for the observed differences, because a lack of blinding is typically associated with  
469 artificially increased diagnostic performance, which is in the opposite direction to the pattern  
470 of results observed here. The impact of some other differences is less clear-cut. For example,

1  
2  
3 471 a higher number of the independent studies met the criterion for consecutive referrals. For  
4 472 this to provide an explanation of the of the observed differences, the non-consecutive nature  
5 473 of the referrals in the studies by those who had developed the PHQ-9 would need to have led  
6 474 to the over-inclusion of true positives or under-inclusion of false negatives given that these  
7  
8 475 studies tended to report higher sensitivity relative to the independent studies (and vice versa  
9 476 for the independent studies). It is not immediately obvious how this would occur. The studies  
10 477 by the developers of the PHQ-9 were more likely to have met the criterion of ‘included all  
11 478 participants in the analysis’. It is possible that the greater loss of participants from the  
12 479 independent studies may have artificially reduced the observed diagnostic accuracy, though,  
13 480 again, it is not immediately obvious how this would have affected the true positive and false  
14 481 negative rates. Although there is not an obvious explanation of how these differences in  
15 482 methodological quality could account for the observed differences in diagnostic performance,  
16 483 it is important to recognise that they cannot on that basis be ruled out.  
17  
18  
19  
20  
21  
22  
23  
24  
25  
26  
27

484

28 485 There are, however, two differences in methodological quality among the algorithm studies  
29 486 that are clearer potential alternative explanations. The higher rate of appropriate translations  
30 487 among the studies conducted by the developers of the PHQ-9 is potentially important,  
31 488 because lower diagnostic estimates may be expected from studies that have poorly translated  
32 489 versions of the index test. In the flow and timing domain, more of the studies by the  
33 490 developers of the PHQ-9 ensured that there was a less than two-week interval between the  
34 491 index and reference test. This is consistent with lower diagnostic performance in the  
35 492 independent studies: as the interval increases it is likely that depression status may change  
36 493 and this would lead to lower levels of agreement between the index test and the reference  
37 494 test.  
38  
39  
40  
41  
42  
43  
44  
45  
46  
47

495

48 496 There were also differences on some quality assessment items between the two sets of studies  
49 497 in the summed item scoring method comparison. The threshold was reported as pre-specified  
50 498 in all of the studies by the developers of the PHQ-9 in contrast to approximately three  
51 499 quarters of the independent studies. On the face of it, this is unlikely to explain the observed  
52 500 differences, because the use of a pre-specified cut-off point is likely to be associated with  
53 501 lower not higher diagnostic test performance. One possibility, however, is that studies that  
54 502 performed poorly at this cut-off point were less likely to be reported by those who had  
55  
56  
57  
58  
59  
60

1  
2  
3 503 developed the measure. As discussed in more detail in the limitations section, we were unable  
4 504 to explore this possibility through the use of formal tests for publication bias.  
5  
6

7 505  
8

9  
10 506 All non-independent studies avoided inappropriate exclusions compared to approximately  
11 507 half of the independent studies. While this is a potential alternative explanation of the  
12 508 differences it is not immediately obvious how this would explain the differences in diagnostic  
13 509 performance between the two sets of studies. Fewer than half of the independent studies met  
14 510 the criterion for 'all participants included in the analysis' in contrast to all of the studies by  
15 511 the developers of the PHQ-9 met this criterion, but again this difference should if at usually  
16 512 work against the inclusive studies, not those excluding cases. More of the independent studies  
17 513 reported that the PHQ-9 was interpreted blind to the reference test. This does offer a potential  
18 514 explanation, because the absence of blinding may artificially inflate diagnostic accuracy.  
19  
20  
21  
22  
23  
24

25 515  
26

## 27 516 **Limitations**

28  
29  
30 517 The results of this review need to be viewed in the light of the limitations of the primary  
31 518 studies that contributed to the review and the review itself. An important consideration is to  
32 519 establish whether any observed differences between the diagnostic performance of the  
33 520 independent and non-independent studies are better accounted for by study characteristic or  
34 521 methodological differences. Caution, however, is needed in interpreting any differences,  
35 522 because of the small number of non-independent studies in both the algorithm and cut-off 10  
36 523 comparisons. The small number of non-independent studies also meant that we were also  
37 524 unable to explore the potential role of publication bias in the independent and non-  
38 525 independent studies. At least 10 studies are required to use standard methods of examining  
39 526 publication bias, but the number of non-independent studies in both the algorithm and cut-off  
40 527 10 comparisons were fewer than this.  
41  
42  
43  
44  
45  
46  
47  
48

49 528  
50

51 529  
52  
53

## 54 530 **Conclusions and implications for further research.**

55  
56  
57  
58  
59  
60

1  
2  
3 531 The aims of the review was to investigate whether an allegiance effect is found that leads to  
4 532 an increased diagnostic performance in diagnostic validation studies that were conducted by  
5 533 teams connected to the original developers of the PHQ-9. Our analyses showed that  
6 534 diagnostic studies conducted by independent researchers had lower sensitivity paired with  
7 535 similar specificity compared to studies that were classified as non-independent. This  
8 536 conclusion held for both the algorithm and cut-off 10 studies. We explored a range of  
9 537 possible alternative explanations for the observed allegiance effect including both differences  
10 538 in study characteristics and study quality. A number of potential differences were found,  
11 539 though for some of these it is not clear how they would necessarily account for the observed  
12 540 differences. However, there were a number of differences that offered potential alternative  
13 541 explanations unconnected to allegiance effects. These included the greater use of the SCID in  
14 542 the studies rated as non-independent in both the algorithm and the cut-off 10 studies. In the  
15 543 algorithm studies, the studies rated as non-independent were also more likely to use an  
16 544 appropriate translation of the PHQ-9 and were also more likely to ensure that the index and  
17 545 reference test were conducted within two weeks of each other, both of which may be  
18 546 associated with an improvement in observed diagnostic performance of an instrument. The  
19 547 majority of studies in both meta-analyses did not provide clear statements about potential  
20 548 conflict of interest and/or funding, however the newer studies were more likely to provide  
21 549 such statements, which may reflect increasing transparency in this area of research.

22 550

23 551 We cannot, therefore, conclude that allegiance effects are present in studies examining the  
24 552 diagnostic performance of the PHQ-9; but nor can we rule them out. Conflicts of interest are  
25 553 an important area of investigation in medical and behavioural research, particularly due to  
26 554 concerns about trial results being influenced by industry sponsorship. Future diagnostic  
27 555 validity in this area should as a matter of routine present clear statements about potential  
28 556 conflicts of interest and funding, particularly relating to the development of the instrument  
29 557 under evaluation. Future meta-analyses of diagnostic validation studies of psychological  
30 558 measures should routinely evaluate the impact of researcher allegiance in the primary studies  
31 559 examined in the meta-analysis.

32 560

33 561



1  
2  
3 562 **Contributors** LM led on all stages of the review and is the guarantor. We used an established  
4 563 database of diagnostic validation studies of the PHQ-9 (Manea et al., 2015; Moriarty et al.,  
5 564 2015) SG provided expert advice on methodology and approaches to assessment of the  
6 565 evidence base. AM carried out the literature searches, screened the studies, extracted data and  
7 566 assessed the quality of the included studies for one of the systematic reviews (Moriarty et al.,  
8 567 2015) . LM carried out the literature searches, screened the studies, extracted data and  
9 568 assessed the quality of the included studies for the other systematic review (Manea et al.,  
10 569 2015), analysed the data for both systematic reviews and drafted the report. JB involved in  
11 570 the development of the study, wrote the introduction section of the review and contributed to  
12 571 the production of the final report. DM supervised the quality assessment, methodology and  
13 572 approaches to evidence synthesis, provided senior advice and support throughout and  
14 573 contributed to the production of the final report. All parties were involved in drafting and/or  
15 574 commenting on the report.

16 575

17 576 **Competing interests** None declared.

18 577

19 578 **Provenance and peer review** Not commissioned; externally peer reviewed.

20 579

21 580 **Data sharing statement** No additional data are available.

22 581

23 582 REFERENCES

- 24 583 1. Adewuya, A. O., Ola, B. A., & Afolabi, O. O. (2006). Validity of the patient health  
25 584 questionnaire (PHQ-9) as a screening tool for depression amongst Nigerian university  
26 585 students. *Journal of Affective Disorders*, 96(1–2), 89–93.  
27 586 <http://doi.org/10.1016/j.jad.2006.05.021>
- 28 587 2. (2010). Validation of PHQ-2 and PHQ-9 to Screen for Major Depression in the Primary  
29 588 Care Population. *The Annals of Family Medicine*, 8(4), 348–353.  
30 589 <http://doi.org/10.1370/afm.1139>

- 1  
2  
3 590 3. Ayalon, L., Goldfracht, M., & Bech, P. (2010). "Do you think you suffer from  
4 591 depression?" Reevaluating the use of a single item question for the screening of  
5 592 depression in older primary care patients. *International Journal of Geriatric Psychiatry*,  
6 593 25(5), 497–502. <http://doi.org/10.1002/gps.2368>
- 7  
8  
9  
10 594 4. Azah, M. N. N., Shah, M. E. M., Juwita, S., Bahri, I. S., Rushidi, W. M. W. M., & Jamil,  
11 595 Y. M. (2005). Validation of the Malay Version Brief Patient Health Questionnaire  
12 596 (PHQ-9) among Adult Attending Family Medicine Clinics. *International Medical*  
13 597 *Journal*.
- 14  
15  
16  
17  
18 598 5. Blair, P. R., Marcus, D. K., & Boccaccini, M. T. (2008). Is There an Allegiance Effect for  
19 599 Assessment Instruments? Actuarial Risk Assessment as an Exemplar. *Clinical*  
20 600 *Psychology: Science and Practice*, 15(4), 346–360. <http://doi.org/10.1111/j.1468->  
21 601 2850.2008.00147.x
- 22  
23  
24  
25 602 6. Chagas, M. H. N., Tumas, V., Rodrigues, G. R., Machado-de-Sousa, J. P., Filho, A. S.,  
26 603 Hallak, J. E. C., & Crippa, J. A. S. (2013). Validation and internal consistency of Patient  
27 604 Health Questionnaire-9 for major depression in Parkinson's disease. *Age and Ageing*,  
28 605 42(5), 645–649. <http://doi.org/10.1093/ageing/aft065>
- 29  
30  
31  
32  
33 606 7. de Lima Osório, F., Vilela Mendes, A., Crippa, J. A., & Loureiro, S. R. (2009). Study of  
34 607 the Discriminative Validity of the PHQ-9 and PHQ-2 in a Sample of Brazilian Women  
35 608 in the Context of Primary Health Care. *Perspectives in Psychiatric Care*, 45(3), 216–  
36 609 227. <http://doi.org/10.1111/j.1744-6163.2009.00224.x>
- 37  
38  
39  
40 610 8. Validation and utility of the patient health questionnaire in diagnosing mental disorders in  
41 611 1003 general hospital Spanish inpatients. *Psychosomatic Medicine*, 63(4), 679–86.  
42 612 Retrieved from <http://www.ncbi.nlm.nih.gov/pubmed/11485122>
- 43  
44  
45  
46 613 9. Dragioti, E., Dimoliatis, I., & Evangelou, E. (2015). Disclosure of researcher allegiance in  
47 614 meta-analyses and randomised controlled trials of psychotherapy: a systematic appraisal.  
48 615 *BMJ Open*, 5(6), e007206–e007206. <http://doi.org/10.1136/bmjopen-2014-007206>
- 49  
50  
51  
52 616 10. Eack, S. M., Greeno, C. G., & Lee, B.-J. (2006). Limitations of the Patient Health  
53 617 Questionnaire in Identifying Anxiety and Depression: Many Cases Are Undetected.  
54 618 *Research on Social Work Practice*, 16(6), 625–631.  
55 619 <http://doi.org/10.1177/1049731506291582>
- 56  
57  
58  
59  
60

- 1  
2  
3 620 11. Elderon, L., Smolderen, K. G., Na, B., & Whooley, M. A. (2011). Accuracy and prognostic  
4 621 value of American Heart Association: recommended depression screening in patients  
5 622 with coronary heart disease: data from the Heart and Soul Study. *Circulation*.  
6 623 *Cardiovascular Quality and Outcomes*, 4(5), 533–40.  
7 624 <http://doi.org/10.1161/CIRCOUTCOMES.110.960302>
- 8  
9  
10  
11  
12 625 12. Fann, J. R., Bombardier, C. H., Dikmen, S., Esselman, P., Warms, C. A., Pelzer, E., ...  
13 626 Temkin, N. (n.d.). Validity of the Patient Health Questionnaire-9 in assessing depression  
14 627 following traumatic brain injury. *The Journal of Head Trauma Rehabilitation*, 20(6),  
15 628 501–11. Retrieved from <http://www.ncbi.nlm.nih.gov/pubmed/16304487>
- 16  
17  
18  
19  
20 629 13. Fine, T. H., Contractor, A. A., Tamburrino, M., Elhai, J. D., Prescott, M. R., Cohen, G.  
21 630 H., ... Calabrese, J. R. (2013). Validation of the telephone-administered PHQ-9 against  
22 631 the in-person administered SCID-I major depression module. *Journal of Affective*  
23 632 *Disorders*, 150(3), 1001–1007. <http://doi.org/10.1016/j.jad.2013.05.029>
- 24  
25  
26  
27 633 14. Gelaye, B., Williams, M. A., Lemma, S., Deyessa, N., Bahretibeb, Y., Shibre, T., ...  
28 634 Andrew Zhou, X. H. (2013). Validity of the patient health questionnaire-9 for depression  
29 635 screening and diagnosis in East Africa. *Psychiatry Research*, 210(2).  
30 636 <http://doi.org/10.1016/j.psychres.2013.07.015>
- 31  
32  
33  
34 637 15. Gilbody, S., Richards, D., Brealey, S., & Hewitt, C. (2007). Screening for depression in  
35 638 medical settings with the Patient Health Questionnaire (PHQ): A diagnostic meta-  
36 639 analysis. *Journal of General Internal Medicine*, 22, 1596–1602.  
37 640 <http://doi.org/10.1007/s11606-007-0333-y>
- 38  
39  
40  
41  
42 641 16. Gjerdingen, D., Crow, S., McGovern, P., Miner, M., & Center, B. (2009). Postpartum  
43 642 depression screening at well-child visits: validity of a 2-question screen and the PHQ-9.  
44 643 *Annals of Family Medicine*, 7(1), 63–70. <http://doi.org/10.1370/afm.933>
- 45  
46  
47  
48 644 17. Gräfe, K., Zipfel, S., Herzog, W., & Löwe, B. (2004). Screening psychischer Störungen  
49 645 mit dem “Gesundheitsfragebogen für Patienten (PHQ-D)“. *Diagnostica*, 50(4), 171–181.  
50 646 <http://doi.org/10.1026/0012-1924.50.4.171>
- 51  
52  
53  
54 647 18. Henkel, V., Mergl, R., Kohnen, R., Allgaier, A.-K., Möller, H.-J., & Hegerl, U. (n.d.).  
55 648 Use of brief depression screening tools in primary care: consideration of heterogeneity  
56 649 in performance in different patient groups. *General Hospital Psychiatry*, 26(3), 190–8.
- 57  
58  
59  
60

- 1  
2  
3 650 <http://doi.org/10.1016/j.genhosppsy.2004.02.003>  
4  
5 651 19. Hyphantis, T., Kotsis, K., Voulgari, P. V., Tsifetaki, N., Creed, F., & Drosos, A. A.  
6  
7 652 (2011). Diagnostic accuracy, internal consistency, and convergent validity of the Greek  
8  
9 653 version of the patient health questionnaire 9 in diagnosing depression in rheumatologic  
10  
11 654 disorders. *Arthritis Care & Research*, 63(9), 1313–1321.  
12  
13 655 <http://doi.org/10.1002/acr.20505>  
14  
15 656 20. Inagaki, M., Ohtsuki, T., Yonemoto, N., Kawashima, Y., Saitoh, A., Oikawa, Y., ...  
16  
17 657 Yamada, M. Validity of the Patient Health Questionnaire (PHQ)-9 and PHQ-2 in general  
18  
19 658 internal medicine primary care at a Japanese rural hospital: a cross-sectional study.  
20  
21 659 *General Hospital Psychiatry*, 35(6), 592–7.  
22  
23 660 <http://doi.org/10.1016/j.genhosppsy.2013.08.001>  
24  
25 661 21. Khamseh, M. E., Baradaran, H. R., Javanbakht, A., Mirghorbani, M., Yadollahi, Z., &  
26  
27 662 Malek, M. (2011). Comparison of the CES-D and PHQ-9 depression scales in people  
28  
29 663 with type 2 diabetes in Tehran, Iran. *BMC Psychiatry*, 11(1), 61.  
30  
31 664 <http://doi.org/10.1186/1471-244X-11-61>  
32  
33 665 22. Kroenke, K., Spitzer, R. L., & Williams, J. B. (2001). The PHQ-9: validity of a brief  
34  
35 666 depression severity measure. *Journal of General Internal Medicine*, 16(9), 606–13.  
36  
37 667 Retrieved from <http://www.ncbi.nlm.nih.gov/pubmed/11556941>  
38  
39 668 23. Lamers, F., Jonkers, C. C. M., Bosma, H., Penninx, B. W. J. H., Knottnerus, J. A., & van  
40  
41 669 Eijk, J. T. M. (2008). Summed score of the Patient Health Questionnaire-9 was a reliable  
42  
43 670 and valid method for depression screening in chronically ill elderly patients. *Journal of*  
44  
45 671 *Clinical Epidemiology*, 61(7), 679–687. <http://doi.org/10.1016/j.jclinepi.2007.07.018>  
46  
47 672 24. Lijmer, J. G., Bossuyt, P. M. M., & Heisterkamp, S. H. (2002). Exploring sources of  
48  
49 673 heterogeneity in systematic reviews of diagnostic tests. *Statistics in Medicine*, 21(11),  
50  
51 674 1525–1537. <http://doi.org/10.1002/sim.1185>  
52  
53 675 25. Lilienfeld, S. O., & Jones, M. K. (2008). Allegiance Effects in Assessment: Unresolved  
54  
55 676 Questions, Potential Explanations, and Constructive Remedies. *Clinical Psychology:*  
56  
57 677 *Science and Practice*, 15(4), 361–365. <http://doi.org/10.1111/j.1468-2850.2008.00148.x>  
58  
59 678 26. Liu, S.-I., Yeh, Z.-T., Huang, H.-C., Sun, F.-J., Tjung, J.-J., Hwang, L.-C., ... Yeh, A.  
60  
679 W.-C. (2011). Validation of Patient Health Questionnaire for depression screening

- 1  
2  
3 680 among primary care patients in Taiwan. *Comprehensive Psychiatry*, 52(1), 96–101.  
4 681 <http://doi.org/10.1016/j.comppsy.2010.04.013>  
5  
6  
7 682 27. Lotrakul, M., Sumrithe, S., & Saipanish, R. (2008). Reliability and validity of the Thai  
8 683 version of the PHQ-9. *BMC Psychiatry*, 8(1), 46. [http://doi.org/10.1186/1471-244X-8-](http://doi.org/10.1186/1471-244X-8-46)  
9 684 46  
10  
11  
12  
13 685 28. Löwe, B., Spitzer, R. L., Gräfe, K., Kroenke, K., Quenter, A., Zipfel, S., ... Herzog, W.  
14 686 (2004). Comparative validity of three screening questionnaires for DSM-IV depressive  
15 687 disorders and physicians' diagnoses. *Journal of Affective Disorders*, 78(2), 131–40.  
16 688 Retrieved from <http://www.ncbi.nlm.nih.gov/pubmed/14706723>  
17  
18  
19  
20 689 29. Luborsky, L., Diguier, L., Seligman, D. A., Rosenthal, R., Krause, E. D., Johnson, S., ...  
21 690 Schweizer, E. (2006). The Researcher's Own Therapy Allegiances: A "Wild Card" in  
22 691 Comparisons of Treatment Efficacy. *Clinical Psychology: Science and Practice*, 6(1),  
23 692 95–106. <http://doi.org/10.1093/clipsy.6.1.95>  
24  
25  
26  
27  
28 693 30. Manea, L., Gilbody, S., & McMillan, D. (2015). A diagnostic meta-analysis of the Patient  
29 694 Health Questionnaire-9 (PHQ-9) algorithm scoring method as a screen for depression.  
30 695 *General Hospital Psychiatry*, 37(1), 67–75.  
31 696 <http://doi.org/10.1016/j.genhosppsy.2014.09.009>  
32  
33  
34  
35 697 31. Mann, R., Hewitt, C. E., & Gilbody, S. M. (2009). Assessing the quality of diagnostic  
36 698 studies using psychometric instruments: applying QUADAS. *Social Psychiatry and*  
37 699 *Psychiatric Epidemiology*, 44(4), 300–307. <http://doi.org/10.1007/s00127-008-0440-z>  
38  
39  
40  
41 700 32. Markman, K. D., & Hirt, E. R. (2002). Social Prediction and the "Allegiance Bias."  
42 701 *Social Cognition*, 20(1), 58–86. <http://doi.org/10.1521/soco.20.1.58.20943>  
43  
44  
45 702 33. McLeod, J. (2010). Taking allegiance seriously—implications for research policy and  
46 703 practice. *European Journal of Psychotherapy and Counselling*. Retrieved from  
47 704 <http://www.tandfonline.com/doi/abs/10.1080/13642531003637791?journalCode=rejp20>  
48 705 #.WC8nwktA-ao.mendeley  
49  
50  
51  
52  
53 706 34. Moriarty, A. S., Gilbody, S., McMillan, D., & Manea, L. (2015). Screening and case  
54 707 finding for major depressive disorder using the Patient Health Questionnaire (PHQ-9): a  
55 708 meta-analysis. *General Hospital Psychiatry*, 37(6), 567–576.  
56 709 <http://doi.org/10.1016/j.genhosppsy.2015.06.012>  
57  
58  
59  
60

- 1  
2  
3 710 35. Munder, T., Brüttsch, O., Leonhart, R., Gerger, H., & Barth, J. (2013). Researcher  
4 711 allegiance in psychotherapy outcome research: An overview of reviews. *Clinical*  
5 712 *Psychology Review*, 33(4), 501–511. <http://doi.org/10.1016/j.cpr.2013.02.002>
- 6  
7  
8 713 36. Muramatsu, K., Miyaoka, H., Kamijima, K., Muramatsu, Y., Yoshida, M., Otsubo, T., &  
9 714 Gejyo, F. (2007). The patient health questionnaire, Japanese version: validity according  
10 715 to the mini-international neuropsychiatric interview-plus. *Psychological Reports*, 101(3  
11 716 Pt 1), 952–60. <http://doi.org/10.2466/pr0.101.3.952-960>
- 12  
13  
14 717 37. Navinés, R., Castellví, P., Moreno-España, J., Gimenez, D., Udina, M., Cañizares, S., ...  
15 718 Martín-Santos, R. (2012). Depressive and anxiety disorders in chronic hepatitis C  
16 719 patients: Reliability and validity of the Patient Health Questionnaire. *Journal of Affective*  
17 720 *Disorders*, 138(3), 343–351. <http://doi.org/10.1016/j.jad.2012.01.018>
- 18  
19  
20 721 38. Patel, V., Araya, R., Chowdhary, N., King, M., Kirkwood, B., Nayak, S., ... Weiss, H. A.  
21 722 (2008). Detecting common mental disorders in primary care in India: a comparison of  
22 723 five screening questionnaires. *Psychological Medicine*, 38(2).  
23 724 <http://doi.org/10.1017/S0033291707002334>
- 24  
25  
26 725 39. Persoons, P., Luyckx, K., Desloovere, C., Vandenberghe, J., & Fischler, B. (n.d.).  
27 726 Anxiety and mood disorders in otorhinolaryngology outpatients presenting with  
28 727 dizziness: validation of the self-administered PRIME-MD Patient Health Questionnaire  
29 728 and epidemiology. *General Hospital Psychiatry*, 25(5), 316–23. Retrieved from  
30 729 <http://www.ncbi.nlm.nih.gov/pubmed/12972222>
- 31  
32  
33 730 40. Phelan, E., Williams, B., Meeker, K., Bonn, K., Frederick, J., LoGerfo, J., & Snowden,  
34 731 M. (2010). A study of the diagnostic accuracy of the PHQ-9 in primary care elderly.  
35 732 *BMC Family Practice*, 11(1), 63. <http://doi.org/10.1186/1471-2296-11-63>
- 36  
37  
38 733 41. Picardi, A., Adler, D. A., Abeni, D., Chang, H., Pasquini, P., Rogers, W. H., & Bungay,  
39 734 K. M. (2005). Screening for depressive disorders in patients with skin diseases: a  
40 735 comparison of three screeners. *Acta Dermato-Venereologica*, 85(5), 414–9.  
41 736 <http://doi.org/10.1080/00015550510034966>
- 42  
43  
44 737 42. Reitsma, J. B., Glas, A. S., Rutjes, A. W. S., Scholten, R. J. P. M., Bossuyt, P. M., &  
45 738 Zwinderman, A. H. (2005). Bivariate analysis of sensitivity and specificity produces  
46 739 informative summary measures in diagnostic reviews. *Journal of Clinical Epidemiology*,



- 1  
2  
3 740 58(10), 982–990. <http://doi.org/10.1016/j.jclinepi.2005.02.022>  
4  
5 741 43. Rooney, A. G., McNamara, S., Mackinnon, M., Fraser, M., Rampling, R., Carson, A., &  
6  
7 742 Grant, R. (2013). Screening for major depressive disorder in adults with cerebral glioma:  
8  
9 743 an initial validation of 3 self-report instruments. *Neuro-Oncology*, *15*(1), 122–129.  
10  
11 744 <http://doi.org/10.1093/neuonc/nos282>  
12  
13 745 44. Sidebottom, A. C., Harrison, P. A., Godecker, A., & Kim, H. (2012). Validation of the  
14  
15 746 Patient Health Questionnaire (PHQ)-9 for prenatal depression screening. *Archives of*  
16  
17 747 *Women's Mental Health*, *15*(5), 367–374. <http://doi.org/10.1007/s00737-012-0295-x>  
18  
19 748 45. Singh, J. P., Grann, M., & Fazel, S. (2013). Authorship Bias in Violence Risk  
20  
21 749 Assessment? A Systematic Review and Meta-Analysis. *PLoS ONE*, *8*(9), e72484.  
22  
23 750 <http://doi.org/10.1371/journal.pone.0072484>  
24  
25 751 46. Spitzer, R. L., Kroenke, K., & Williams, J. B. (1999). Validation and utility of a self-  
26  
27 752 report version of PRIME-MD: the PHQ primary care study. Primary Care Evaluation of  
28  
29 753 Mental Disorders. Patient Health Questionnaire. *JAMA*, *282*(18), 1737–44. Retrieved  
30  
31 754 from <http://www.ncbi.nlm.nih.gov/pubmed/10568646>  
32  
33 755 47. Stafford, L., Berk, M., & Jackson, H. J. (2007). Validity of the Hospital Anxiety and  
34  
35 756 Depression Scale and Patient Health Questionnaire-9 to screen for depression in patients  
36  
37 757 with coronary artery disease. *General Hospital Psychiatry*, *29*(5), 417–424.  
38  
39 758 <http://doi.org/10.1016/j.genhosppsych.2007.06.005>  
40  
41 759 48. Staines, G. L., & Cleland, C. M. (2007). Bias in meta-analytic estimates of the absolute  
42  
43 760 efficacy of psychotherapy. *Review of General Psychology*, *11*(4), 329–347.  
44  
45 761 <http://doi.org/10.1037/1089-2680.11.4.329>  
46  
47 762 49. Thekkumpurath, P., Walker, J., Butcher, I., Hodges, L., Kleiboer, A., O'Connor, M., ...  
48  
49 763 Sharpe, M. (2011). Screening for major depression in cancer outpatients: the diagnostic  
50  
51 764 accuracy of the 9-item patient health questionnaire. *Cancer*, *117*(1), 218–27.  
52  
53 765 <http://doi.org/10.1002/cncr.25514>  
54  
55 766 50. Thombs, B. D., Ziegelstein, R. C., & Whooley, M. A. (2008). Optimizing detection of  
56  
57 767 major depression among patients with coronary artery disease using the patient health  
58  
59 768 questionnaire: data from the heart and soul study. *Journal of General Internal Medicine*,  
60  
769 *23*(12), 2014–7. <http://doi.org/10.1007/s11606-008-0802-y>

- 1  
2  
3 770 51. Thompson, A. W., Liu, H., Hays, R. D., Katon, W. J., Rausch, R., Diaz, N., ... Vickrey,  
4 771 B. G. (2011). Diagnostic accuracy and agreement across three depression assessment  
5 772 measures for Parkinson's disease. *Parkinsonism & Related Disorders*, *17*(1), 40–45.  
6 773 <http://doi.org/10.1016/j.parkreldis.2010.10.007>  
7  
8  
9  
10 774 52. Thompson, S. G., & Higgins, J. P. T. (2002). How should meta-regression analyses be  
11 775 undertaken and interpreted? *Statistics in Medicine*, *21*(11), 1559–1573.  
12 776 <http://doi.org/10.1002/sim.1187>  
13  
14  
15  
16 777 53. Turner, A., Hambridge, J., White, J., Carter, G., Clover, K., Nelson, L., & Hackett, M.  
17 778 (2012). Depression screening in stroke: a comparison of alternative measures with the  
18 779 structured diagnostic interview for the diagnostic and statistical manual of mental  
19 780 disorders, fourth edition (major depressive episode) as criterion standard. *Stroke; a*  
20 781 *Journal of Cerebral Circulation*, *43*(4), 1000–5.  
21 782 <http://doi.org/10.1161/STROKEAHA.111.643296>  
22  
23  
24  
25  
26  
27 783 54. van Steenberg-Weijnenburg, K. M., de Vroege, L., Ploeger, R. R., Brals, J. W.,  
28 784 Vloedveld, M. G., Veneman, T. F., ... van der Feltz-Cornelis, C. M. (2010). Validation  
29 785 of the PHQ-9 as a screening instrument for depression in diabetes patients in specialized  
30 786 outpatient clinics. *BMC Health Services Research*, *10*(1), 235.  
31 787 <http://doi.org/10.1186/1472-6963-10-235>  
32  
33  
34  
35  
36 788 55. Walter, S. D. (2002). Properties of the summary receiver operating characteristic (SROC)  
37 789 curve for diagnostic test data. *Statistics in Medicine*, *21*(9), 1237–1256.  
38 790 <http://doi.org/10.1002/sim.1099>  
39  
40  
41  
42 791 56. Walters, G. D. (2009). The Psychological Inventory of Criminal Thinking Styles and  
43 792 Psychopathy Checklist: Screening version as incrementally valid predictors of  
44 793 recidivism. *Law and Human Behavior*, *33*(6), 497–505. [http://doi.org/10.1007/s10979-](http://doi.org/10.1007/s10979-008-9167-3)  
45 794 [008-9167-3](http://doi.org/10.1007/s10979-008-9167-3)  
46  
47  
48  
49 795 57. Watnick, S., Wang, P.-L., Demadura, T., & Ganzini, L. (2005). Validation of 2  
50 796 depression screening tools in dialysis patients. *American Journal of Kidney Diseases :*  
51 797 *The Official Journal of the National Kidney Foundation*, *46*(5), 919–24.  
52 798 <http://doi.org/10.1053/j.ajkd.2005.08.006>  
53  
54  
55  
56  
57 799 58. Whiting, P. F., Rutjes, A. W. S., Westwood, M. E., Mallett, S., Deeks, J. J., Reitsma, J.  
58  
59  
60



- 1  
2  
3 800 B., ... QUADAS-2 Group. (2011). QUADAS-2: a revised tool for the quality  
4 801 assessment of diagnostic accuracy studies. *Annals of Internal Medicine*, 155(8), 529–36.  
5 802 <http://doi.org/10.7326/0003-4819-155-8-201110180-00009>  
6  
7  
8  
9 803 59. Williams, L. S., Brizendine, E. J., Plue, L., Bakas, T., Tu, W., Hendrie, H., & Kroenke, K.  
10 804 (2005). Performance of the PHQ-9 as a screening tool for depression after stroke.  
11 805 *Stroke; a Journal of Cerebral Circulation*, 36(3), 635–8.  
12 806 <http://doi.org/10.1161/01.STR.0000155688.18207.33>  
13  
14  
15  
16 807 60. Winter, D. A. (2010, May 7). Editorial. Routledge. Retrieved from  
17 808 [http://www.tandfonline.com/doi/abs/10.1080/13642531003637726?needAccess=true&j](http://www.tandfonline.com/doi/abs/10.1080/13642531003637726?needAccess=true&journalCode=rejp20#.WC8nUSu6MP8.mendeley)  
18 809 [ournalCode=rejp20#.WC8nUSu6MP8.mendeley](http://www.tandfonline.com/doi/abs/10.1080/13642531003637726?needAccess=true&journalCode=rejp20#.WC8nUSu6MP8.mendeley)  
19  
20  
21  
22 810 61. Wittkamp, K., van Ravesteijn, H., Baas, K., van de Hoogen, H., Schene, A., Bindels, P.,  
23 811 ... van Weert, H. (2009). The accuracy of Patient Health Questionnaire-9 in detecting  
24 812 depression and measuring depression severity in high-risk groups in primary care.  
25 813 *General Hospital Psychiatry*, 31(5), 451–459.  
26 814 <http://doi.org/10.1016/j.genhosppsy.2009.06.001>  
27  
28  
29  
30  
31 815 62. Zhang, Y., Ting, R., Lam, M., Lam, J., Nan, H., Yeung, R., ... Chan, J. C. N. (2013).  
32 816 Measuring depressive symptoms using the Patient Health Questionnaire-9 in Hong Kong  
33 817 Chinese subjects with type 2 diabetes. *Journal of Affective Disorders*, 151(2), 660–666.  
34 818 <http://doi.org/10.1016/j.jad.2013.07.014>  
35  
36  
37  
38  
39 819 63. Zuithoff, N. P., Vergouwe, Y., King, M., Nazareth, I., van Wezep, M. J., Moons, K. G., &  
40 820 Geerlings, M. I. (2010). The Patient Health Questionnaire-9 for detection of major  
41 821 depressive disorder in primary care: consequences of current thresholds in a  
42 822 cross-sectional study. *BMC Family Practice*, 11(1), 98. [http://doi.org/10.1186/1471-](http://doi.org/10.1186/1471-2296-11-98)  
43 823 [2296-11-98](http://doi.org/10.1186/1471-2296-11-98)  
44  
45  
46  
47  
48 824

**Table 1: Descriptive characteristics of algorithm studies (Manea et al., 2014)**

| Study                      | Sample characteristics<br>(Country, setting, age, sex)                                                                                | Sample size and % depressed     | PHQ-9 characteristics                                      | Diagnostic standard   | a) Conflict of interest (COI) declaration<br>b) Funding<br>c) Relationship with original developers |
|----------------------------|---------------------------------------------------------------------------------------------------------------------------------------|---------------------------------|------------------------------------------------------------|-----------------------|-----------------------------------------------------------------------------------------------------|
| Diez-Quevedo et al. (2001) | Country: Spain<br><br>Setting:<br>Medical and surgical tertiary hospitals<br><br>Age (yrs):<br>M=43<br>(SD=14.2)<br><br>Female: 45.6% | N = 1003<br><br>Depressed: 8.2% | Administration:<br>Self-report<br><br>Language:<br>Spanish | DSM-III-R<br><br>SCID | a) a) No COI declaration<br>b) Funding acknowledged (academic institutions)<br>c) Not acknowledged  |
| Gräfe et al. (2004)        | Country:<br>Germany                                                                                                                   | N = 528                         | Language:<br>German                                        | DSM-IV                | a) No COI declaration<br>b) Acknowledged funding from Pfizer<br>c) Not acknowledged                 |

1  
2  
3  
4  
5  
6  
7  
8  
9  
10  
11  
12  
13  
14  
15  
16  
17  
18  
19  
20  
21  
22  
23  
24  
25  
26  
27  
28  
29  
30  
31  
32  
33  
34  
35  
36  
37  
38  
39  
40  
41  
42  
43  
44  
45  
46  
47  
48  
49

Setting: Depressed:  
psychosomatic 29.2%  
walk-in clinics psychosomatic Administration: SCID  
and family patients; self-report  
practices 6.16% medical patients

Age (yrs): M =  
41.9 (SD =  
13.8)

Female: 67.8%

Lowe et al. (2004)

Country: N = 501 Administration: DSM-IV  
Germany Self-report

- a) COI declaration 'This study was supported by unrestricted restricted grants from Pfizer Germany and from the medical faculty of the University of Heidelberg Germany, and there are no COI.'
- b) Acknowledged funding from Pfizer and academic institution
- c) Not acknowledged

Setting: Depressed: Language: SCID  
Outpatient 13.2% German  
clinics and family practices

|    |                       |                                                     |                     |                                |        |
|----|-----------------------|-----------------------------------------------------|---------------------|--------------------------------|--------|
| 1  |                       |                                                     |                     |                                |        |
| 2  |                       |                                                     |                     |                                |        |
| 3  |                       |                                                     |                     |                                |        |
| 4  |                       |                                                     |                     |                                |        |
| 5  |                       |                                                     |                     |                                |        |
| 6  |                       |                                                     |                     |                                |        |
| 7  |                       |                                                     |                     |                                |        |
| 8  |                       |                                                     |                     |                                |        |
| 9  |                       |                                                     |                     |                                |        |
| 10 |                       |                                                     |                     |                                |        |
| 11 |                       |                                                     |                     |                                |        |
| 12 |                       |                                                     |                     |                                |        |
| 13 |                       |                                                     |                     |                                |        |
| 14 | Muramatsu et al.      |                                                     |                     |                                |        |
| 15 | (2007)                | Country: Japan                                      | N = 131             | Administration:<br>Self-report | DSM-IV |
| 16 |                       |                                                     |                     |                                |        |
| 17 |                       |                                                     |                     |                                |        |
| 18 |                       |                                                     |                     |                                |        |
| 19 |                       | Setting:<br>Primary care<br>and general<br>hospital | Depressed:<br>28.2% | Language:<br>Japanese          | MINI   |
| 20 |                       |                                                     |                     |                                |        |
| 21 |                       |                                                     |                     |                                |        |
| 22 |                       |                                                     |                     |                                |        |
| 23 |                       |                                                     |                     |                                |        |
| 24 |                       |                                                     |                     |                                |        |
| 25 |                       |                                                     |                     |                                |        |
| 26 |                       |                                                     |                     |                                |        |
| 27 |                       |                                                     |                     |                                |        |
| 28 |                       |                                                     |                     |                                |        |
| 29 |                       |                                                     |                     |                                |        |
| 30 | Navinés et al. (2012) | Country: Spain                                      | N = 500             | Administration:<br>Self-report | DSM-IV |
| 31 |                       |                                                     |                     |                                |        |
| 32 |                       |                                                     |                     |                                |        |
| 33 |                       |                                                     |                     |                                |        |
| 34 |                       |                                                     |                     |                                |        |
| 35 |                       |                                                     |                     |                                |        |
| 36 |                       |                                                     |                     |                                |        |
| 37 |                       |                                                     |                     |                                |        |
| 38 |                       |                                                     |                     |                                |        |
| 39 |                       |                                                     |                     |                                |        |
| 40 |                       |                                                     |                     |                                |        |
| 41 |                       |                                                     |                     |                                |        |
| 42 |                       |                                                     |                     |                                |        |
| 43 |                       |                                                     |                     |                                |        |
| 44 |                       |                                                     |                     |                                |        |
| 45 |                       |                                                     |                     |                                |        |
| 46 |                       |                                                     |                     |                                |        |
| 47 |                       |                                                     |                     |                                |        |
| 48 |                       |                                                     |                     |                                |        |
| 49 |                       |                                                     |                     |                                |        |

Age (yrs): M =  
41.7 (SD =  
13.8)

Female: 67.1%

- a) No COI declaration
- b) Acknowledged funding from Pfizer
- c) Acknowledged one of the developers of the PHQ-9:  
'The authors acknowledge Dr R L Spitzer'

Setting:

Primary care  
and general  
hospital

Depressed:  
28.2%

Language:  
Japanese

MINI

Age (yrs): M =  
43.3 (SD =  
16.4)

Female: 59.5%

- a) All authors declared that they had no COI.
- b) Role of funding source declared
- c) Not acknowledged

1  
2  
3  
4  
5  
6  
7  
8  
9  
10  
11  
12  
13  
14  
15  
16  
17  
18  
19  
20  
21  
22  
23  
24  
25  
26  
27  
28  
29  
30  
31  
32  
33  
34  
35  
36  
37  
38  
39  
40  
41  
42  
43  
44  
45  
46  
47  
48  
49

Setting:  
General hospital  
(patients with chronic HCV)  
Depressed: 6.4%  
Language: Spanish  
SCID

Age (yrs): M = 43.4 (SD = 10.2)  
Female: 28.6%

Spitzer et al. (1999)

Country: US  
N = 3000 (585 received SCID)  
Administration: Self-report  
DSM-III-R

- a) No COI declaration
- b) Acknowledged funding from Pfizer. 'Drs Spitzer and Williams receive honoraria and consulting money from Pfizer Inc, which has supported this work.'
- c) N/A

Setting:  
Primary care  
Depressed: 10%  
Language: English  
SCID

Age (yrs): M = 46 (SD = 17.2)  
Female: 66%

|    |                      |                 |               |                 |        |                                                       |
|----|----------------------|-----------------|---------------|-----------------|--------|-------------------------------------------------------|
| 1  |                      |                 |               |                 |        |                                                       |
| 2  |                      |                 |               |                 |        |                                                       |
| 3  |                      |                 |               |                 |        |                                                       |
| 4  |                      |                 |               |                 |        |                                                       |
| 5  |                      |                 |               |                 |        |                                                       |
| 6  |                      |                 |               |                 |        |                                                       |
| 7  |                      |                 |               |                 |        | a) COI declaration: 'Supported by Cancer              |
| 8  | Thekkumpurath et al. | Country: UK     | N = 782       | Administration: | DSM-IV | Research UK'                                          |
| 9  | (2010)               |                 |               | Not stated      |        | b) As in a)                                           |
| 10 |                      |                 |               |                 |        | c) Not acknowledged                                   |
| 11 |                      | Setting:        |               |                 |        |                                                       |
| 12 |                      | Hospital        | Depressed:    | Language:       | SCID   |                                                       |
| 13 |                      | (cancer         | 6.3% (of the  | English         |        |                                                       |
| 14 |                      | patients)       | whole sample) |                 |        |                                                       |
| 15 |                      |                 |               |                 |        |                                                       |
| 16 |                      | Age (yrs): M =  |               |                 |        |                                                       |
| 17 |                      | 61              |               |                 |        |                                                       |
| 18 |                      |                 |               |                 |        |                                                       |
| 19 |                      | Female: 63%     |               |                 |        |                                                       |
| 20 |                      |                 |               |                 |        |                                                       |
| 21 |                      |                 |               |                 |        |                                                       |
| 22 |                      |                 |               |                 |        |                                                       |
| 23 |                      |                 |               |                 |        | a) COI declaration: 'The project was funded by an     |
| 24 |                      |                 |               |                 |        | Investigator's Initiated Research Grant from Lundbeck |
| 25 |                      |                 |               |                 |        | International given to Dr Liat Ayalon. Lundbeck       |
| 26 |                      |                 |               |                 |        | International had no other involvement in the project |
| 27 |                      |                 |               |                 |        | concept of design or in this paper. Per Bech has      |
| 28 |                      |                 |               | Administration: |        | occasionally over the past 3 years until August 2008  |
| 29 | Ayalon et al. (2010) | Country: Israel | N = 153       | Researcher      | DSM-IV | received funding from and has been speaker or         |
| 30 |                      |                 |               | administered    |        | member of advisory boards for pharmaceutical          |
| 31 |                      |                 |               |                 |        | companies with an interest in the drug treatment of   |
| 32 |                      |                 |               |                 |        | affective disorders (Astra-Zeneca, Lilly, H. Lundbeck |
| 33 |                      |                 |               |                 |        | A/S, Lundbeck Foundation and Organon). '              |
| 34 |                      |                 |               |                 |        | b) Acknowledged funding from Lundbeck International   |
| 35 |                      |                 |               |                 |        |                                                       |
| 36 |                      |                 |               |                 |        |                                                       |
| 37 |                      |                 |               |                 |        |                                                       |
| 38 |                      |                 |               |                 |        |                                                       |
| 39 |                      |                 |               |                 |        |                                                       |
| 40 |                      |                 |               |                 |        |                                                       |
| 41 |                      |                 |               |                 |        |                                                       |
| 42 |                      |                 |               |                 |        |                                                       |
| 43 |                      |                 |               |                 |        |                                                       |
| 44 |                      |                 |               |                 |        |                                                       |
| 45 |                      |                 |               |                 |        |                                                       |
| 46 |                      |                 |               |                 |        |                                                       |
| 47 |                      |                 |               |                 |        |                                                       |
| 48 |                      |                 |               |                 |        |                                                       |
| 49 |                      |                 |               |                 |        |                                                       |

1  
2  
3  
4  
5  
6  
7  
8  
9  
10  
11  
12  
13  
14  
15  
16  
17  
18  
19  
20  
21  
22  
23  
24  
25  
26  
27  
28  
29  
30  
31  
32  
33  
34  
35  
36  
37  
38  
39  
40  
41  
42  
43  
44  
45  
46  
47  
48  
49

|                    |                                                       |                  |                                        |        |                                                                                           |
|--------------------|-------------------------------------------------------|------------------|----------------------------------------|--------|-------------------------------------------------------------------------------------------|
|                    | Age (yrs): M = 75 (SD = 8.1)                          | Depressed: 3.9 % | Language: Hebrew                       | SCID   |                                                                                           |
|                    | Female: 40.5 %                                        |                  |                                        |        |                                                                                           |
|                    | Country: US                                           | N = 50           | Administration: Self-report            | DSM-IV | a) No COI declaration<br>b) Funding acknowledged (academic /health research institutions) |
| Eack et al. (2006) | Setting: Community mental health centers for children | Depressed: 28%   | Language: English                      | SCID   |                                                                                           |
|                    | Age (yrs): M = 39.20 (SD 9.63)                        |                  |                                        |        |                                                                                           |
|                    | Female: 100%                                          |                  |                                        |        |                                                                                           |
| Fann et al. (2005) | Country: US                                           | N = 135          | Administration: Telephone-administered | DSM-IV | a) No COI declaration<br>b) Funding acknowledged (academic institutions)                  |

1  
2  
3  
4  
5  
6  
7  
8  
9  
10  
11  
12  
13  
14  
15  
16  
17  
18  
19  
20  
21  
22  
23  
24  
25  
26  
27  
28  
29  
30  
31  
32  
33  
34  
35  
36  
37  
38  
39  
40  
41  
42  
43  
44  
45  
46  
47  
48  
49

Setting:  
Trauma  
hospital  
(inpatients with  
traumatic brain  
injury)

Depressed:  
16.3%

Language:  
English

SCID

Age (yrs): M =  
42 (SD=17.9)

Female: 29.1%

Gelaye et al. (2011)

Country:  
Ethiopia

N = 363

Administration:  
Researcher-  
administered

DSM-IV

- a) No COI declaration
- b) Funding acknowledged (academic /health  
research institutions)

Setting:  
General  
hospital

Depressed:  
12.6%

Language:  
Amharic

SCAN

Age (yrs): 34.9  
(SD=11.6)

Female: 63.1 %



1  
2  
3  
4  
5  
6  
7  
8  
9  
10  
11  
12  
13  
14  
15  
16  
17  
18  
19  
20  
21  
22  
23  
24  
25  
26  
27  
28  
29  
30  
31  
32  
33  
34  
35  
36  
37  
38  
39  
40  
41  
42  
43  
44  
45  
46  
47  
48  
49

|                          |                            |                    |                                                |        |                                                                                              |
|--------------------------|----------------------------|--------------------|------------------------------------------------|--------|----------------------------------------------------------------------------------------------|
| Gjerdingen et al. (2009) | Country: US                | N = 438            | Administration:<br>Telephone or<br>self-report | DSM-IV | a) No COI declaration<br>b) Funding acknowledged (academic /health<br>research institutions) |
|                          | Setting:<br>Community      | Depressed:<br>4.6% | Language:<br>English                           | SCID   |                                                                                              |
|                          | Age (yrs): M =<br>29.3     |                    |                                                |        |                                                                                              |
|                          | Female: 100%               |                    |                                                |        |                                                                                              |
| Henkel et al. (2004)     | Country:<br>Germany        | N = 448            | Administration:<br>self-report                 | DSM-IV | a) No COI declaration<br>b) Funding acknowledged (academic /health<br>research institutions) |
|                          | Setting:<br>primary care   | Depressed:<br>10%  |                                                | CIDI   |                                                                                              |
|                          | Age (yrs): not<br>reported |                    | Language:<br>German                            |        |                                                                                              |
|                          | Female: 74%                |                    |                                                |        |                                                                                              |

|    |                       |                 |                |                            |                                                                                     |
|----|-----------------------|-----------------|----------------|----------------------------|-------------------------------------------------------------------------------------|
| 1  |                       |                 |                |                            |                                                                                     |
| 2  |                       |                 |                |                            |                                                                                     |
| 3  |                       |                 |                |                            |                                                                                     |
| 4  |                       |                 |                |                            |                                                                                     |
| 5  |                       |                 |                |                            |                                                                                     |
| 6  |                       |                 |                |                            |                                                                                     |
| 7  |                       |                 |                |                            | a) No COI declaration                                                               |
| 8  |                       |                 |                |                            | b) No funding acknowledgement                                                       |
| 9  | Hyphantis et al.      | Country:        | N = 213        | Administration:            | DSM-IV                                                                              |
| 10 | (2011)                | Greece          |                | Researcher<br>administered |                                                                                     |
| 11 |                       |                 |                |                            |                                                                                     |
| 12 |                       | Setting:        |                |                            |                                                                                     |
| 13 |                       | Hospital –      | Depressed:     | Language:                  | MINI                                                                                |
| 14 |                       | rheumatology    | 32.4%          | Greek                      |                                                                                     |
| 15 |                       | patients        |                |                            |                                                                                     |
| 16 |                       |                 |                |                            |                                                                                     |
| 17 |                       | Age (yrs): M =  |                |                            |                                                                                     |
| 18 |                       | 54.2 (SD =      |                |                            |                                                                                     |
| 19 |                       | 13.5)           |                |                            |                                                                                     |
| 20 |                       |                 |                |                            |                                                                                     |
| 21 |                       | Female: 74%     |                |                            |                                                                                     |
| 22 |                       |                 |                |                            |                                                                                     |
| 23 |                       |                 |                |                            |                                                                                     |
| 24 |                       |                 |                |                            | a) COI declaration: ‘The authors declare that they have<br>no competing interests.’ |
| 25 |                       |                 | N = 104 out of | Administration:            | DSM-IV                                                                              |
| 26 | Inagaki et al. (2013) | Country: Japan  | 511 received   | Researcher                 |                                                                                     |
| 27 |                       |                 | MINI           | administered               | b) Funding acknowledged (academic /health<br>research institutions)                 |
| 28 |                       |                 |                |                            |                                                                                     |
| 29 |                       |                 |                |                            |                                                                                     |
| 30 |                       | Setting:        |                |                            |                                                                                     |
| 31 |                       | General         | Depressed:     | Language:                  | MINI                                                                                |
| 32 |                       | hospital        | 7.4%           | Japanese                   |                                                                                     |
| 33 |                       |                 |                |                            |                                                                                     |
| 34 |                       |                 |                |                            |                                                                                     |
| 35 |                       | Age whole       |                |                            |                                                                                     |
| 36 |                       | sample (yrs): M |                |                            |                                                                                     |
| 37 |                       | = 73.5 (SD =    |                |                            |                                                                                     |
| 38 |                       | 12.3)           |                |                            |                                                                                     |
| 39 |                       |                 |                |                            |                                                                                     |
| 40 |                       |                 |                |                            |                                                                                     |
| 41 |                       |                 |                |                            |                                                                                     |
| 42 |                       |                 |                |                            |                                                                                     |
| 43 |                       |                 |                |                            |                                                                                     |
| 44 |                       |                 |                |                            |                                                                                     |
| 45 |                       |                 |                |                            |                                                                                     |
| 46 |                       |                 |                |                            |                                                                                     |
| 47 |                       |                 |                |                            |                                                                                     |
| 48 |                       |                 |                |                            |                                                                                     |
| 49 |                       |                 |                |                            |                                                                                     |

1  
2  
3  
4  
5  
6  
7  
8  
9  
10  
11  
12  
13  
14  
15  
16  
17  
18  
19  
20  
21  
22  
23  
24  
25  
26  
27  
28  
29  
30  
31  
32  
33  
34  
35  
36  
37  
38  
39  
40  
41  
42  
43  
44  
45  
46  
47  
48  
49

|                       |                                  |                  |                             |        |                                                                                                                                     |
|-----------------------|----------------------------------|------------------|-----------------------------|--------|-------------------------------------------------------------------------------------------------------------------------------------|
|                       | Female: 59.3%                    |                  |                             |        |                                                                                                                                     |
| Khamseh et al. (2011) | Country: Iran                    | N = 185          | Administration: Self report | DSM-IV | a) COI declaration: The authors declared no competing interests<br>b) Funding acknowledged (academic /health research institutions) |
|                       | Setting: Diabetes clinic         | Depressed: 43.2% | Language: Persian           | SCID   |                                                                                                                                     |
|                       | Age (yrs): M = 56.17 (SD = 9.60) |                  |                             |        |                                                                                                                                     |
|                       | Female: 51.9%                    |                  |                             |        |                                                                                                                                     |
| Lamers et al. (2008)  | Country: Netherlands             | N = 713          | Administration: Self report | DSM-IV | a) No COI declaration<br>b) Funding acknowledged (academic /health research institutions)                                           |
|                       | Setting: Primary care (elderly)  | Depressed: 10.7% | Language: Dutch             | MINI   |                                                                                                                                     |
|                       | Age (yrs): M = 71.4 (SD = 6.90)  |                  |                             |        |                                                                                                                                     |
|                       | Female: 48.2%                    |                  |                             |        |                                                                                                                                     |

|    |                        |                          |                    |                                |                       |                                                                     |
|----|------------------------|--------------------------|--------------------|--------------------------------|-----------------------|---------------------------------------------------------------------|
| 1  |                        |                          |                    |                                |                       |                                                                     |
| 2  |                        |                          |                    |                                |                       |                                                                     |
| 3  |                        |                          |                    |                                |                       |                                                                     |
| 4  |                        |                          |                    |                                |                       |                                                                     |
| 5  |                        |                          |                    |                                |                       |                                                                     |
| 6  |                        |                          |                    |                                |                       |                                                                     |
| 7  |                        |                          |                    |                                | a) No COI declaration |                                                                     |
| 8  | Lotrakul et al. (2008) | Country:<br>Thailand     | N = 279            | Administration:<br>Self report | DSM-IV                | b) Funding acknowledged (academic /health<br>research institutions) |
| 9  |                        |                          |                    |                                |                       |                                                                     |
| 10 |                        |                          |                    |                                | MINI                  |                                                                     |
| 11 |                        |                          |                    |                                |                       |                                                                     |
| 12 |                        |                          |                    |                                |                       |                                                                     |
| 13 |                        | Setting:<br>Primary care | Depressed:<br>6.8% | Language: Thai                 |                       |                                                                     |
| 14 |                        |                          |                    |                                |                       |                                                                     |
| 15 |                        |                          |                    |                                |                       |                                                                     |
| 16 |                        |                          |                    |                                |                       |                                                                     |
| 17 |                        | Age (yrs): M =           |                    |                                |                       |                                                                     |
| 18 |                        | 45.0 (SD =               |                    |                                |                       |                                                                     |
| 19 |                        | 14.30)                   |                    |                                |                       |                                                                     |
| 20 |                        |                          |                    |                                |                       |                                                                     |
| 21 |                        | Female: 73.7%            |                    |                                |                       |                                                                     |
| 22 |                        |                          |                    |                                |                       |                                                                     |
| 23 |                        |                          |                    |                                |                       |                                                                     |
| 24 | Persoons et al.        | Country:                 | N = 268 (97        | Administration:                | DSM-IV                | a) No COI declaration                                               |
| 25 | (2003)                 | Belgium                  | received           | Self-report                    |                       | b) Funding acknowledged (academic /health                           |
| 26 |                        |                          | MINI)              |                                |                       | research institutions) and Pfizer Belgium                           |
| 27 |                        |                          |                    |                                |                       |                                                                     |
| 28 |                        |                          |                    |                                |                       |                                                                     |
| 29 |                        | Setting:                 |                    |                                |                       |                                                                     |
| 30 |                        | Hospital                 | Depressed:         | Language:                      | MINI                  |                                                                     |
| 31 |                        | (otolaryngology          | 16.5%              | Dutch                          |                       |                                                                     |
| 32 |                        | patients)                |                    |                                |                       |                                                                     |
| 33 |                        |                          |                    |                                |                       |                                                                     |
| 34 |                        | Age (yrs): M =           |                    |                                |                       |                                                                     |
| 35 |                        | 48.2 (SD =               |                    |                                |                       |                                                                     |
| 36 |                        | 12.9)                    |                    |                                |                       |                                                                     |
| 37 |                        |                          |                    |                                |                       |                                                                     |
| 38 |                        |                          |                    |                                |                       |                                                                     |
| 39 |                        |                          |                    |                                |                       |                                                                     |
| 40 |                        |                          |                    |                                |                       |                                                                     |
| 41 |                        |                          |                    |                                |                       |                                                                     |
| 42 |                        |                          |                    |                                |                       |                                                                     |
| 43 |                        |                          |                    |                                |                       |                                                                     |
| 44 |                        |                          |                    |                                |                       |                                                                     |
| 45 |                        |                          |                    |                                |                       |                                                                     |
| 46 |                        |                          |                    |                                |                       |                                                                     |
| 47 |                        |                          |                    |                                |                       |                                                                     |
| 48 |                        |                          |                    |                                |                       |                                                                     |
| 49 |                        |                          |                    |                                |                       |                                                                     |

1  
2  
3  
4  
5  
6  
7  
8  
9  
10  
11  
12  
13  
14  
15  
16  
17  
18  
19  
20  
21  
22  
23  
24  
25  
26  
27  
28  
29  
30  
31  
32  
33  
34  
35  
36  
37  
38  
39  
40  
41  
42  
43  
44  
45  
46  
47  
48  
49

|                        |                                                  |                    |                                |        |                                                                                                                                                                                                        |
|------------------------|--------------------------------------------------|--------------------|--------------------------------|--------|--------------------------------------------------------------------------------------------------------------------------------------------------------------------------------------------------------|
|                        | Female: 65.6%                                    |                    |                                |        |                                                                                                                                                                                                        |
| Picardi et al. (2005)  | Country: Italy                                   | N = 141            | Administration:<br>Self-report | DSM-IV | a) No COI declaration<br>b) Funding acknowledged (academic /health research institutions). Acknowledged Pfizer Italia SRL for providing the Italian version of the PHQ-9 and for permission to use it. |
|                        | Setting:<br>Hospital<br>(dermatology inpatients) | Depressed:<br>8.5% | Language:<br>Italian           | SCID   |                                                                                                                                                                                                        |
|                        | Age (yrs): M =<br>37.5                           |                    |                                |        |                                                                                                                                                                                                        |
|                        | Female: 56%                                      |                    |                                |        |                                                                                                                                                                                                        |
| Stafford et al. (2007) | Country:<br>Australia                            | N = 193            | Administration:<br>Self-report | DSM-IV | a) No COI declaration<br>b) Funding acknowledged (academic/health research institutions)                                                                                                               |
|                        | Setting:<br>Hospital<br>(cardiology patients)    | Depressed:<br>18%  | Language:<br>English           | MINI   |                                                                                                                                                                                                        |
|                        | Age (yrs): M =<br>64.1 (SD =<br>10.3)            |                    |                                |        |                                                                                                                                                                                                        |

|    |                      |                                                 |                   |                                         |                                                                    |
|----|----------------------|-------------------------------------------------|-------------------|-----------------------------------------|--------------------------------------------------------------------|
| 1  |                      |                                                 |                   |                                         |                                                                    |
| 2  |                      |                                                 |                   |                                         |                                                                    |
| 3  |                      |                                                 |                   |                                         |                                                                    |
| 4  |                      |                                                 |                   |                                         |                                                                    |
| 5  |                      |                                                 |                   |                                         |                                                                    |
| 6  |                      |                                                 |                   |                                         |                                                                    |
| 7  |                      | Female: 66%                                     |                   |                                         |                                                                    |
| 8  |                      |                                                 |                   |                                         |                                                                    |
| 9  |                      |                                                 |                   |                                         |                                                                    |
| 10 |                      | Country: US                                     | N = 1024          | Administration:<br>Not stated           | DSM                                                                |
| 11 |                      |                                                 |                   |                                         |                                                                    |
| 12 |                      |                                                 |                   |                                         |                                                                    |
| 13 |                      |                                                 |                   |                                         | a) COI declaration "None disclosed"                                |
| 14 |                      |                                                 |                   |                                         | b) Funding acknowledged (academic/health research<br>institutions) |
| 15 |                      | Setting:<br>Hospital                            |                   |                                         |                                                                    |
| 16 |                      | (outpatients<br>with coronary<br>heart disease) | Depressed:<br>22% | Language:<br>English                    | C-DIS                                                              |
| 17 |                      |                                                 |                   |                                         |                                                                    |
| 18 | Thombs et al. (2008) |                                                 |                   |                                         |                                                                    |
| 19 |                      |                                                 |                   |                                         |                                                                    |
| 20 |                      |                                                 |                   |                                         |                                                                    |
| 21 |                      |                                                 |                   |                                         |                                                                    |
| 22 |                      | Age (yrs): M =                                  |                   |                                         |                                                                    |
| 23 |                      | 67 (SD = 11)                                    |                   |                                         |                                                                    |
| 24 |                      |                                                 |                   |                                         |                                                                    |
| 25 |                      |                                                 |                   |                                         |                                                                    |
| 26 |                      | Female: 18%                                     |                   |                                         |                                                                    |
| 27 |                      |                                                 |                   |                                         |                                                                    |
| 28 |                      |                                                 |                   |                                         |                                                                    |
| 29 |                      |                                                 |                   |                                         | a) No COI declaration                                              |
| 30 | Thompson et al.      |                                                 |                   |                                         | b) Funding acknowledged (academic/health research<br>institutions) |
| 31 | (2010)               | Country: US                                     | N = 214           | Administration:<br>Self<br>administered | DSM-IV                                                             |
| 32 |                      |                                                 |                   |                                         |                                                                    |
| 33 |                      |                                                 |                   |                                         | SCID                                                               |
| 34 |                      |                                                 |                   |                                         |                                                                    |
| 35 |                      |                                                 |                   |                                         |                                                                    |
| 36 |                      |                                                 |                   |                                         |                                                                    |
| 37 |                      |                                                 |                   |                                         |                                                                    |
| 38 |                      |                                                 |                   |                                         |                                                                    |
| 39 |                      |                                                 |                   |                                         |                                                                    |
| 40 |                      |                                                 |                   |                                         |                                                                    |
| 41 |                      |                                                 |                   |                                         |                                                                    |
| 42 |                      |                                                 |                   |                                         |                                                                    |
| 43 |                      |                                                 |                   |                                         |                                                                    |
| 44 |                      |                                                 |                   |                                         |                                                                    |
| 45 |                      |                                                 |                   |                                         |                                                                    |
| 46 |                      |                                                 |                   |                                         |                                                                    |
| 47 |                      |                                                 |                   |                                         |                                                                    |
| 48 |                      |                                                 |                   |                                         |                                                                    |
| 49 |                      |                                                 |                   |                                         |                                                                    |

1  
2  
3  
4  
5  
6  
7  
8  
9  
10  
11  
12  
13  
14  
15  
16  
17  
18  
19  
20  
21  
22  
23  
24  
25  
26  
27  
28  
29  
30  
31  
32  
33  
34  
35  
36  
37  
38  
39  
40  
41  
42  
43  
44  
45  
46  
47  
48  
49

|                                      |                                                   |                   |                                         |        |                                                                                                                                                                                                                        |
|--------------------------------------|---------------------------------------------------|-------------------|-----------------------------------------|--------|------------------------------------------------------------------------------------------------------------------------------------------------------------------------------------------------------------------------|
|                                      | Setting:<br>Patients with<br>Parkinson<br>Disease | Depressed:<br>14% | Language:<br>English                    |        |                                                                                                                                                                                                                        |
|                                      | Age (yrs): 72.5<br>(SD = 9.6)                     |                   |                                         |        |                                                                                                                                                                                                                        |
|                                      | Female: 42%                                       |                   |                                         |        |                                                                                                                                                                                                                        |
| Turner et al. (2012)                 | Country:<br>Australia                             | N = 72            | Administration:<br>Self<br>administered | DSM-IV | a) COI declaration: Disclosures 'None'.<br>b) Funding acknowledged (academic/health<br>research institutions)                                                                                                          |
|                                      | Setting: Stroke<br>patients                       | Depressed:<br>18% | Language:<br>English                    | SCID   |                                                                                                                                                                                                                        |
|                                      | Age (yrs): 66.7<br>(SD = 13.1)                    |                   |                                         |        |                                                                                                                                                                                                                        |
|                                      | Female: 47.2%                                     |                   |                                         |        |                                                                                                                                                                                                                        |
| van Steenberg-<br>Weijnenburg (2010) | Country:<br>Netherlands                           | N = 197           | Administration:<br>Self<br>administered | DSM-IV | a) COI declaration: 'The authors declare that they<br>have no competing interests'.<br>b) Funding acknowledged (academic/health research<br>institutions) - 'this had no influence on the content of<br>this article'. |

1  
2  
3  
4  
5  
6  
7  
8  
9  
10  
11  
12  
13  
14  
15  
16  
17  
18  
19  
20  
21  
22  
23  
24  
25  
26  
27  
28  
29  
30  
31  
32  
33  
34  
35  
36  
37  
38  
39  
40  
41  
42  
43  
44  
45  
46  
47  
48  
49

Setting:  
Diabetes  
patients  
Depressed:  
18.8%  
Language:  
Dutch  
SCID  
Age (yrs): M =  
61.8 (SD =  
13.6)  
Female: 48.7%

Country:  
Netherlands  
N = 1338  
Administration:  
Self-report  
DSM-IV

- a) COI declaration ‘The authors declare that they have no competing interests.’
- b) Funding acknowledged (academic/health research institutions).

Zuithoff et al.  
(2010)

Setting:  
Primary care  
Depressed:  
13%  
Language:  
Dutch  
CIDI  
Age (yrs): M =  
51 (sd = 16.7)  
Female: 63%



**Table 2: Descriptive characteristics of the summed items scoring method studies cut-off point 10 (Moriarty et al, 2015)**

| Study                     | Sample characteristics                                                                                                                     | Sample size and % MDD                                                          | PHQ-9 characteristics                                                         | Diagnostic standard | a) Conflict of interest (COI) declaration<br>b) Funding<br>c) Relationship with original developers |
|---------------------------|--------------------------------------------------------------------------------------------------------------------------------------------|--------------------------------------------------------------------------------|-------------------------------------------------------------------------------|---------------------|-----------------------------------------------------------------------------------------------------|
| 13. Gräfe et al. (2004)   | Country: Germany<br><br>Setting: psychosomatic walk-in clinics and family practices<br><br>Mean age: 41.9 (SD = 13.8)<br><br>Female: 67.8% | N = 528<br><br>Depressed: 29.2% psychosomatic patients; 6.16% medical patients | Administration: self-report<br><br>Language: German<br><br>Cut-offs: 10 to 14 | DSM-IV SCID         | c) No COI declaration<br>d) Acknowledged funding from Pfizer<br>e) Not acknowledged                 |
| 16. Kroenke et al. (2001) | Country: USA<br><br>Setting: Primary care<br><br>Mean age: 46 (SD=17)<br><br>Female: 66%                                                   | N = 580<br><br>7.1% MDD                                                        | Administration: Self-report<br><br>Language: English<br><br>Cut-offs: 9 to 15 | DSM-IV SCID         | a) No COI declaration<br>b) Acknowledged funding from Pfizer<br>c) N/A                              |
| 22. Navinés et al.        | Country: Spain                                                                                                                             | N = 500                                                                        | Administration: Self-                                                         | DSM-IV              | a) All authors declared                                                                             |

|                                 |                                                                                                      |                                           |                                                                      |                |                                                                                                 |
|---------------------------------|------------------------------------------------------------------------------------------------------|-------------------------------------------|----------------------------------------------------------------------|----------------|-------------------------------------------------------------------------------------------------|
| (2012)                          | Setting: General hospital (patients with chronic HCV)<br>Mean age: 43.4 (SD = 10.2)<br>Female: 28.6% | 6.4% MDD                                  | report<br>Language: Spanish<br>Cut-offs: 10                          | SCID           | that they had no COI.<br>b) Role of funding source declared<br>c) Not acknowledged              |
| 29. Thekkumpurath et al. (2010) | Country: UK<br>Setting: Hospital (cancer patients)<br>Mean age: 61<br>Female: 63%                    | N = 782<br>6.3% MDD (of the whole sample) | Administration: Not stated<br>Language: English<br>Cut-offs: 5 to 10 | DSM-IV<br>SCID | c) COI declaration: 'Supported by Cancer Research UK'<br>d) As in a)<br>e) Not acknowledged     |
| 33. Williams et al. (2005)      | Country: USA<br>Setting: Secondary care (Post-stroke)<br>Mean age: Unclear<br>Female: Unclear        | N = 316<br>33.5% MDD                      | Administration: Unclear<br>Language: English<br>Cut-offs: 10         | DSM-IV<br>SCID | c) No COI declaration<br>d) Funding acknowledged (academic institutions)<br>e) Not acknowledged |

| Study | Sample characteristics | Sample size and % MDD | PHQ-9 characteristics | Diagnostic standard | d) Conflict of interest declaration<br>e) Funding |
|-------|------------------------|-----------------------|-----------------------|---------------------|---------------------------------------------------|
|-------|------------------------|-----------------------|-----------------------|---------------------|---------------------------------------------------|

|                          |                                                                                              |                      |                                                                         | d              |                                                                                           |
|--------------------------|----------------------------------------------------------------------------------------------|----------------------|-------------------------------------------------------------------------|----------------|-------------------------------------------------------------------------------------------|
| 1. Adewuya et al. (2006) | Country: Nigeria<br>Setting: community (students)<br>Mean age: 24.8 (15-40)<br>Female: 41.2% | N = 512<br>2.5% MDD  | Administration: Self-report<br>Language: English<br>Cut-offs: 8 to 12   | DSM-IV<br>MINI | a) No COI declaration<br>b) No funding declaration                                        |
| 2. Arroll et al. (2010)  | Country: New Zealand<br>Setting: Primary care<br>Mean age: 49 (17-99)<br>Female: 61%         | N = 2642<br>6.2% MDD | Administration: Not stated<br>Language: English<br>Cut-offs: 8,10,12,15 | DSM-IV<br>SCID | a) No COI declaration<br>b) Funding acknowledged (academic /health research institutions) |
| 3. Azah et al. (2005)    | Country: Malaysia<br>Setting: Primary care<br>Mean age: 38.7 (18-79)<br>Female: 61.7%        | N = 180<br>16.6% MDD | Administration: Self-report<br>Language: Malay<br>Cut-offs: 5 to 12     | DSM-IV<br>CIDI | b) No COI declaration<br>c) Funding acknowledged (academic /health research institutions) |
| 4. Chagas et al. (2013)  | Country: Brazil                                                                              | N = 84               | Administration: self-report                                             | DSM-IV<br>SCID | a) COI declaration "None declared"                                                        |

|                                 |                                                                               |                       |                                                                                             |                |                                                                                                                                                                                                                                                                              |
|---------------------------------|-------------------------------------------------------------------------------|-----------------------|---------------------------------------------------------------------------------------------|----------------|------------------------------------------------------------------------------------------------------------------------------------------------------------------------------------------------------------------------------------------------------------------------------|
|                                 | Setting: Secondary care<br>Mean age: Not stated<br>Female: 52.7%              | 25.5% MDD             | Language: Brazilian<br>Cut-offs: 7 to 10                                                    |                | b) Funding acknowledged (academic/health research institutions)                                                                                                                                                                                                              |
| 6. de Lima Osorio et al. (2009) | Country: Brazil<br>Setting: Primary care<br>Mean age: Unclear<br>Female: 100% | N = 177<br>34% MDD    | Administration: research assistants<br>Language: Brazilian Portuguese<br>Cut-offs: 10 to 15 | DSM-IV<br>SCID | a) No COI declaration<br>b) Funding acknowledged (academic institutions)                                                                                                                                                                                                     |
| 7. Elderon et al. (2011)        | Country: USA<br>Setting: Secondary care<br>Mean age: Unclear<br>Female: 18%   | N = 1022<br>18.3% MDD | Administration: self-report<br>Language: English<br>Cut-offs: 10                            | C-DIS          | a) COI declaration – ‘No disclosures’<br>b) Funding acknowledged (academic institutions and industry – AHA Pharmaceuticals Roundtable) – ‘The funding organisations had no role in the design or conduct of the study, collection, management, analysis or interpretation of |

|                       |                                                                                                                             |                      |                                                                                |                  |                                                                                                                                                                                                                                                                       |
|-----------------------|-----------------------------------------------------------------------------------------------------------------------------|----------------------|--------------------------------------------------------------------------------|------------------|-----------------------------------------------------------------------------------------------------------------------------------------------------------------------------------------------------------------------------------------------------------------------|
|                       |                                                                                                                             |                      |                                                                                |                  | data; or preparation, review or approval of the manuscript.'                                                                                                                                                                                                          |
| 8. Fann et al. (2005) | Country: US<br>Setting: Trauma hospital (inpatients with traumatic brain injury)<br>Mean age: 42 (SD=17.9)<br>Female: 29.1% | N = 135<br>16.3% MDD | Administration: Telephone-administered<br>Language: English<br>Cut-offs: 10    | DSM-IV<br>SCID   | b) No COI declaration<br>c) Funding acknowledged (academic institutions)                                                                                                                                                                                              |
| 9. Fine et al. (2013) | Country: USA<br>Setting: Primary care (Ohio Army National Guard)<br>Mean age: 31 (17-60)<br>Female: 12%                     | N = 498<br>21.5% MDD | Administration: Telephone-administered<br>Language: English<br>Cut-offs: 10,15 | DSM-IV<br>SCID-I | a) COI – last author disclosed financial and consulting interests (Pfizer not one of them). All other authors declared that they have no COI.<br>b) Funding acknowledged – DoD Medical Research. “The sponsor had no role in study design, data collection, analysis, |

|                           |                                                                                              |                      |                                                                                           |                |                                                                                                                                                                                                                    |
|---------------------------|----------------------------------------------------------------------------------------------|----------------------|-------------------------------------------------------------------------------------------|----------------|--------------------------------------------------------------------------------------------------------------------------------------------------------------------------------------------------------------------|
|                           |                                                                                              |                      |                                                                                           |                | interpretation of results, report writing or manuscript submission.                                                                                                                                                |
| 10. Gelaye et al. (2013)  | Country: Ethiopia<br>Setting: General hospital<br>Mean age: 34.9 (SD=11.6)<br>Female: 63.1 % | N = 363<br>12.6% MDD | Administration: Researcher-administered<br><br>Language: Amharic<br><br>Cut-offs: 9 to 11 | DSM-IV<br>SCAN | c) No COI declaration<br>d) Funding acknowledged (academic /health research institutions)                                                                                                                          |
| 11. Gilbody et al. (2007) | Country: UK<br>Setting: Primary care<br>Mean age: 42.5 (SD 13.6)<br>Female: 77%              | N = 96<br>37.5 MDD   | Administration: Not stated<br><br>Language: English<br><br>Cut-offs: 9 to 13              | DSM-IV<br>SCID | a) COI declaration – last author involved in the development of one of the instruments (CORE-OM), 'but does not gain financially from its use.<br>b) Funding acknowledged (academic /health research institutions) |
| 12. Gjerdingen et         | Country: USA                                                                                 | N = 438              | Administration:                                                                           | DSM-IV         | c) No COI declaration                                                                                                                                                                                              |

|                             |                                                                                                           |                      |                                                                                 |                |                                                                                                                                     |
|-----------------------------|-----------------------------------------------------------------------------------------------------------|----------------------|---------------------------------------------------------------------------------|----------------|-------------------------------------------------------------------------------------------------------------------------------------|
| al. (2009)                  | Setting: Community<br>Mean age: 29.3<br>Female: 100%                                                      | 4.6% MDD             | Telephone or self-report<br>Language: English<br>Cut-offs: 10                   | SCID           | d) Funding acknowledged (academic /health research institutions)                                                                    |
| 14. Hyphantis et al. (2011) | Country: Greece<br>Setting: Hospital – rheumatology patients<br>Mean age: 54.2 (SD = 13.5)<br>Female: 74% | N = 213<br>32.4% MDD | Administration: Researcher administered<br>Language: Greek<br>Cut-offs: 4 to 16 | DSM-IV<br>MINI | c) No COI declaration<br>d) No funding acknowledgement                                                                              |
| 15. Khamseh et al. (2011)   | Country: Iran<br>Setting: Outpatient diabetic clinic<br>Mean age: 56.1 (SD=9.6)<br>Female: 51.8%          | N = 185<br>43.2% MDD | Administration: Self-report<br>Language: Persian<br>Cut-offs: 10,13             | DSM-IV<br>SCID | c) COI declaration: The authors declared no competing interests<br>d) Funding acknowledged (academic /health research institutions) |
|                             |                                                                                                           |                      |                                                                                 |                |                                                                                                                                     |
|                             |                                                                                                           |                      |                                                                                 |                |                                                                                                                                     |
|                             |                                                                                                           |                      |                                                                                 |                |                                                                                                                                     |

|                            |                                                                                            |                          |                                                                                                |             |                                                                                                                     |
|----------------------------|--------------------------------------------------------------------------------------------|--------------------------|------------------------------------------------------------------------------------------------|-------------|---------------------------------------------------------------------------------------------------------------------|
| 19. Liu et al. (2011)      | Country: Taiwan<br>Setting: Primary care<br>Mean age: Not specified<br>Female: 60.9%       | N = 1532<br><br>3.3% MDD | Administration: Self-report<br><br>Language: Chinese version<br><br>Cut-offs: 9 to 11          | SCAN        | a) a) No COI declaration<br>b) Funding acknowledged (academic /health research institutions)                        |
| 20. Lotrakul et al. (2008) | Country: Thailand<br>Setting: Primary care<br>Mean age: 45.0 (SD = 14.30)<br>Female: 73.7% | N = 279<br><br>6.8% MDD  | Administration: Self report<br><br>Language: Thai<br><br>Cut-offs: 7 to 15                     | DSM-IV MINI | c) No COI declaration<br>d) Funding acknowledged (academic /health research institutions)                           |
| 23. Patel et al. (2008)    | Country: India<br>Setting: Primary care<br>Mean age: 37.5 (18-83)<br>Female: 56.4%         | N = 299<br><br>4.3% MDD  | Administration: Face-to-face interview<br><br>Language: Not specified<br><br>Cut-offs: 7 to 15 | CIS-R       | a) COI declaration – No Declaration of Interest<br>b) Funding acknowledged (academic /health research institutions) |
| 24. Phelan et al. (2010)   | Country: USA<br>Setting: Primary care                                                      | N = 71<br><br>12% MDD    | Administration: Research assistant                                                             | DSM-IV SCID | a) COI declaration – No competing interests                                                                         |



|                           |                                                                                              |                      |                                                                       |                |                                                                                                                                                                                                                                                                                       |
|---------------------------|----------------------------------------------------------------------------------------------|----------------------|-----------------------------------------------------------------------|----------------|---------------------------------------------------------------------------------------------------------------------------------------------------------------------------------------------------------------------------------------------------------------------------------------|
|                           | (elderly)<br>Mean age: 78 (SD=7)<br>Female: 62%                                              |                      | Language: English<br>Cut-offs: 8 to 12                                |                | b) Funding acknowledged (academic /health research institutions) . "The funder had no role in the study design, methods, data collection, analysis or interpretation of data, nor any role in the preparation of the manuscript or decision to submit the manuscript for publication. |
| 25. Rooney et al. (2013)  | Country: UK<br>Setting: Secondary care (glioma)<br>Mean age: 54.2 (SD=12.3)<br>Female: 42.6% | N = 129<br>13.5% MDD | Administration: Self-report<br>Language: English<br>Cut-offs: 8 to 11 | DSM-IV<br>SCID | a) COI declaration "The authors declare that they have no COI"<br>b) Funding acknowledged (academic/health research institutions)                                                                                                                                                     |
| 26. Sherina et al. (2012) | Country: Malaysia<br>Setting: Primary care                                                   | N= 146<br>21.2% MDD  | Administration: Self-report                                           | CIDI           | a) COI declaration "The authors declare that they                                                                                                                                                                                                                                     |

|                              |                                                                                                                |                      |                                                                      |                |                                                                                                                                                |
|------------------------------|----------------------------------------------------------------------------------------------------------------|----------------------|----------------------------------------------------------------------|----------------|------------------------------------------------------------------------------------------------------------------------------------------------|
|                              | Mean age: 30.9 (18-81)<br>Female: 100%                                                                         |                      | Language: Malay<br>Cut-offs: 10                                      |                | have no competing interests"<br>b) Funding acknowledged (academic/health research institutions)                                                |
| 27. Sidebottom et al. (2012) | Country: USA<br>Setting: Community (prenatal)<br>Mean age: 23 (SD=5.5)<br>Female: 100%                         | N = 745<br>3.6% MDD  | Administration: Interview<br>Language: English<br>Cut-offs: 10       | DSM-IV<br>SCID | a) COI declaration<br>"The authors declare that they have no financial COI"<br>b) Funding acknowledged (academic/health research institutions) |
| 28. Stafford et al. (2007)   | Country: Australia<br>Setting: Secondary care (cardiac procedures)<br>Mean age: 64.14 (38-91)<br>Female: 19.2% | N = 193<br>18.1% MDD | Administration: Self-report<br>Language: English<br>Cut-offs: 10     | DSM-IV<br>MINI | b) No COI declaration<br>c) Funding acknowledged (academic/health research institutions)                                                       |
| 30. Thombs et al. (2008)     | Country: US<br>Setting: Hospital (outpatients with coronary heart disease)<br>Mean age: 67 (SD = 11)           | N = 1024<br>22% MDD  | Administration: Not stated<br>Language: English<br>Cut-offs: 7 to 10 | DSM<br>C-DIS   | b) COI declaration<br>"None disclosed"<br>b) Funding acknowledged (academic/health research institutions)                                      |

|                            |                                                                                                                  |                      |                                                                               |                 |                                                                                                                                               |
|----------------------------|------------------------------------------------------------------------------------------------------------------|----------------------|-------------------------------------------------------------------------------|-----------------|-----------------------------------------------------------------------------------------------------------------------------------------------|
|                            | Female: 18%                                                                                                      |                      |                                                                               |                 |                                                                                                                                               |
| 32. Watnick et al. (2005)  | Country: USA<br>Setting: Secondary care (dialysis)<br>Mean age: 63 (SD=15)<br>Female: 32.3%                      | N = 62<br>19% MDD    | Administration: Self-report<br>Language: English<br>Cut-offs: 10              | DSM-IV<br>SCID  | a) No COI declaration<br>b) Funding acknowledged (academic/health research institutions)                                                      |
| 34. Wittkamp et al. (2009) | Country: Netherlands<br>Setting: Primary care<br>Mean age: 49.8<br>Female: 66.7%                                 | N = 664<br>12.3% MDD | Administration: Self-report<br>Language: Not specified<br>Cut-offs: 10 and 15 | DSM-IV<br>SCIDI | a) No COI declaration<br>b) Funding acknowledged (academic/health research institutions)                                                      |
| 35. Zhang et al. (2013)    | Country: Hong Kong<br>Setting: Secondary care (diabetic outpatients)<br>Mean age: 55.1 (SD=9.5)<br>Female: 40.8% | N = 99<br>23.2% MDD  | Administration: Self-report<br>Language: Chinese version<br>Cut-offs: 15      | DSM-IV<br>MINI  | a) COI declaration – last author acknowledged financial COI. The other authors declare that they have no competing interests.<br>b) ) Funding |

|                               |                                                                                                  |                            |                                                    |                |                                                                                                                                                                     |
|-------------------------------|--------------------------------------------------------------------------------------------------|----------------------------|----------------------------------------------------|----------------|---------------------------------------------------------------------------------------------------------------------------------------------------------------------|
|                               |                                                                                                  |                            |                                                    |                | acknowledged<br>(academic/health<br>research<br>institutions)                                                                                                       |
| 36. Zuithoff et al.<br>(2010) | Country: Netherlands<br>Setting: Primary care<br>Age (yrs): M = 51 (sd =<br>16.7)<br>Female: 63% | N = 1338<br>Depressed: 13% | Administration: Self-<br>report<br>Language: Dutch | DSM-IV<br>CIDI | b) COI declaration<br>"The authors<br>declare that they<br>have no competing<br>interests.<br>b) Funding acknowledged<br>(academic/health<br>research institutions) |

**Table 3: Quality assessment of included studies in the algorithm meta-analysis (Manea et al., 2014)**

1  
2  
3  
4  
5  
6  
7  
8  
9  
10  
11  
12  
13  
14  
15  
16  
17  
18  
19  
20  
21  
22  
23  
24  
25  
26  
27  
28  
29  
30  
31  
32  
33  
34  
35  
36  
37  
38  
39  
40  
41  
42  
43  
44  
45  
46  
47  
48  
49

| Study                       | Patient selection:<br>Consecutive or random sample | Patient selection:<br>Avoid case-control / avoid artificially inflated base rate | Patient selection:<br>Avoided inappropriate exclusions | Patient selection:<br>Overall risk of bias | Index test:<br>PHQ-9 interpreted blind to reference test | Index test:<br>If translated, appropriate translation | Index test:<br>If translated, psychometric properties reported | Index test:<br>Overall risk of bias |
|-----------------------------|----------------------------------------------------|----------------------------------------------------------------------------------|--------------------------------------------------------|--------------------------------------------|----------------------------------------------------------|-------------------------------------------------------|----------------------------------------------------------------|-------------------------------------|
| Diez-Quevedo et al. (2001)  | ✗                                                  | ✓                                                                                | ✗                                                      | High                                       | ?                                                        | ✓                                                     | ✓                                                              | Unclear                             |
| Gräfe et al. (2004)         | ✓                                                  | ✓                                                                                | ✓                                                      | Low                                        | ?                                                        | ✓                                                     | ✓                                                              | Unclear                             |
| Lowe et al. (2004)          | ✗                                                  | ✓                                                                                | ✓                                                      | High                                       | ✓                                                        | ✓                                                     | ✓                                                              | Low                                 |
| Muramatsu et al. (2007)     | ?                                                  | ✓                                                                                | ?                                                      | Unclear                                    | ✓                                                        | ✓                                                     | ?                                                              | Unclear                             |
| Navines et al. (2012)       | ✓                                                  | ✓                                                                                | ✓                                                      | Low                                        | ✓                                                        | ✓                                                     | ?                                                              | Unclear                             |
| Spitzer et al. (1999)       | ✗                                                  | ✓                                                                                | ✓                                                      | High                                       | ✓                                                        | n/a                                                   | n/a                                                            | Low                                 |
| Thekkumpurath et al. (2010) | ✗                                                  | ✗                                                                                | ✓                                                      | High                                       | ✓                                                        | n/a                                                   | n/a                                                            | Low                                 |
| Arroll et al. (2010)        | ✓                                                  | ✓                                                                                | ✓                                                      | Low                                        | ✓                                                        | n/a                                                   | n/a                                                            | Low                                 |
| Ayalon et al. (2010)        | ?                                                  | ✓                                                                                | ✓                                                      | Unclear                                    | ?                                                        | ✓                                                     | ?                                                              | Unclear                             |
| Eack et al. (2006)          | ?                                                  | ✓                                                                                | ?                                                      | Unclear                                    | ?                                                        | n/a                                                   | n/a                                                            | Unclear                             |
| Fann et al. (2005)          | ✓                                                  | ✗                                                                                | ✗                                                      | High                                       | ✓                                                        | n/a                                                   | n/a                                                            | Low                                 |
| Gelaye et al. (2013)        | ?                                                  | ✗                                                                                | ?                                                      | High                                       | ✓                                                        | ✓                                                     | ?                                                              | Unclear                             |
| Gjerdengen et al. (2009)    | ✓                                                  | ✓                                                                                | ✓                                                      | Low                                        | ?                                                        | n/a                                                   | n/a                                                            | Unclear                             |
| Henkel et al. (2004)        | ✓                                                  | ✓                                                                                | ✓                                                      | Low                                        | ?                                                        | n/a                                                   | n/a                                                            | Unclear                             |
| Hyphantis et al. (2011)     | ✓                                                  | ✓                                                                                | ✗                                                      | High                                       | ✓                                                        | ?                                                     | ?                                                              | Unclear                             |

1  
2  
3  
4  
5  
6  
7  
8  
9  
10  
11  
12  
13  
14  
15  
16  
17  
18  
19  
20  
21  
22  
23  
24  
25  
26  
27  
28  
29  
30  
31  
32  
33  
34  
35  
36  
37  
38  
39  
40  
41  
42  
43  
44  
45  
46  
47  
48  
49

|                                 |   |   |   |         |   |     |     |         |
|---------------------------------|---|---|---|---------|---|-----|-----|---------|
| Inagaki et al. (2013)           | ✓ | ✗ | ✓ | High    | ✓ | ?   | ?   | Unclear |
| Khamseh et al. (2011)           | ✓ | ✓ | ? | Unclear | ✓ | ✓   | ?   | Unclear |
| Lamers et al. (2008)            | ✓ | ✗ | ✗ | High    | ✓ | ?   | ?   | Unclear |
| Lotrakul et al. (2008)          | ✗ | ✓ | ? | High    | ✓ | ✓   | ?   | Unclear |
| Persoons et al. (2003)          | ✓ | ✓ | ✓ | Low     | ✓ | ✓   | n/a | Low     |
| Picardi et al. (2005)           | ✓ | ✓ | ✓ | Low     | ✓ | ?   | ?   | Unclear |
| Stafford et al. (2007)          | ✓ | ✓ | ✓ | Low     | ✓ | n/a | n/a | Low     |
| Thombs et al. (2008)            | ✗ | ✓ | ? | Unclear | ? | n/a | n/a | Unclear |
| Thomson et al. (2011)           | ? | ✓ | ✓ | Unclear | ? | n/a | n/a | Unclear |
| Turner et al. (2012)            | ✓ | ✓ | ✓ | Low     | ✓ | n/a | n/a | Low     |
| Van Steenberg-Wijnenburg (2010) | ? | ✓ | ✓ | Unclear | ? | ?   | ?   | Unclear |
| Zuithoff et al. (2010)          | ✓ | ✓ | ✓ | Low     | ✓ | ✓   | ?   | Unclear |

✓ = criterion met; ✗ = criterion not met; ? = insufficient information to code whether criterion met; n/a = not applicable

<sup>1</sup>If studies reported multiple cut-off points, 'threshold pre-specified' is coded as not applicable.

**Table 3: Quality assessment of included studies in the algorithm meta-analysis (Manea et al., 2015) (continued)**

| Study                       | Reference test:<br>Reference test correctly classifies target condition | Reference test:<br>Reference test interpreted blind to PHQ-9 | Reference test:<br>If translated, appropriate translation | Reference test:<br>If translated, psychometric properties reported | Reference test:<br>Overall risk of bias | Flow / timing:<br>Interval of two weeks or less | Flow / timing:<br>All participants receive same reference test | Flow / timing:<br>All participants included in analysis? | Flow / timing:<br>Overall risk of bias |
|-----------------------------|-------------------------------------------------------------------------|--------------------------------------------------------------|-----------------------------------------------------------|--------------------------------------------------------------------|-----------------------------------------|-------------------------------------------------|----------------------------------------------------------------|----------------------------------------------------------|----------------------------------------|
| Diez-Quevedo et al. (2001)  | ✓                                                                       | ✓                                                            | ✓                                                         | ?                                                                  | Unclear                                 | ✓                                               | ✓                                                              | ✓                                                        | Low                                    |
| Gräfe et al. (2004)         | ✓                                                                       | ?                                                            | n/a                                                       | n/a                                                                | Unclear                                 | ✓                                               | ✓                                                              | ✓                                                        | Low                                    |
| Lowe et al. (2004)          | ✓                                                                       | ✓                                                            | n/a                                                       | n/a                                                                | Low                                     | ✓                                               | ✓                                                              | ✓                                                        | Low                                    |
| Muramatsu et al. (2007)     | ✓                                                                       | ✓                                                            | ✓                                                         | ✓                                                                  | Low                                     | ✓                                               | ✓                                                              | ?                                                        | Unclear                                |
| Navines et al. (2012)       | ✓                                                                       | ✓                                                            | ?                                                         | ?                                                                  | Unclear                                 | ✓                                               | ✓                                                              | ✓                                                        | Low                                    |
| Spitzer et al. (1999)       | ✓                                                                       | ✓                                                            | n/a                                                       | n/a                                                                | Low                                     | ✓                                               | ✓                                                              | ✗                                                        | High                                   |
| Thekkumpurath et al. (2010) | ✓                                                                       | ✓                                                            | n/a                                                       | n/a                                                                | Low                                     | ?                                               | ✓                                                              | ✗                                                        | High                                   |
| Arroll et al. (2010)        | ✓                                                                       | ✓                                                            | n/a                                                       | n/a                                                                | Low                                     | ✓                                               | ✓                                                              | ✓                                                        | Low                                    |
| Ayalon et al. (2010)        | ✓                                                                       | ?                                                            | ✓                                                         | ?                                                                  | Unclear                                 | ?                                               | ✓                                                              | ✓                                                        | Unclear                                |
| Eack et al. (2006)          | ✓                                                                       | ?                                                            | n/a                                                       | n/a                                                                | Unclear                                 | ?                                               | ✓                                                              | ?                                                        | Unclear                                |
| Fann et al. (2005)          | ✓                                                                       | ?                                                            | n/a                                                       | n/a                                                                | Unclear                                 | ✓                                               | ✓                                                              | ✗                                                        | High                                   |
| Gelaye et al. (2013)        | ✓                                                                       | ✓                                                            | ✓                                                         | ✓                                                                  | Low                                     | ✓                                               | ✓                                                              | ✗                                                        | High                                   |
| Gjerdingen et al. (2009)    | ✓                                                                       | ?                                                            | n/a                                                       | n/a                                                                | Unclear                                 | ✓                                               | ✓                                                              | ✗                                                        | High                                   |
| Henkel et al. (2004)        | ✓                                                                       | ?                                                            | n/a                                                       | n/a                                                                | Unclear                                 | ✓                                               | ✓                                                              | ✗                                                        | High                                   |

**Table 4: Quality assessment of included studies in the summed item scoring method cut-off point 10 meta-analysis (Moriarty et al., 2015)**

|                                   |   |   |     |     |         |   |   |   |         |
|-----------------------------------|---|---|-----|-----|---------|---|---|---|---------|
| Hyphantis et al. (2011)           | ✓ | ✓ | ?   | ?   | Unclear | ✓ | ✓ | ✗ | High    |
| Inagaki et al. (2013)             | ✓ | ✓ | ✓   | ?   | Unclear | ✓ | ✓ | ✗ | High    |
| Khamsseh et al. (2011)            | ✓ | ✓ | ✓   | ?   | Unclear | ✓ | ✓ | ? | Unclear |
| Lamers et al. (2008)              | ✓ | ✓ | ?   | ?   | Unclear | ? | ✓ | ✗ | High    |
| Lotrakul et al. (2008)            | ✓ | ✓ | ✓   | ✓   | Low     | ? | ✓ | ✗ | High    |
| Persoons et al. (2003)            | ✓ | ✓ | ?   | ?   | Unclear | ✓ | ✓ | ✓ | Low     |
| Picardi et al. (2005)             | ✓ | ✓ | ✓   | ?   | Unclear | ✓ | ✓ | ✗ | High    |
| Stafford et al. (2007)            | ✓ | ✓ | n/a | n/a | Low     | ✓ | ✓ | ✗ | High    |
| Thombs et al. (2008)              | ? | ✓ | n/a | n/a | Unclear | ✓ | ✓ | ✓ | Low     |
| Thompson et al. (2011)            | ✓ | ? | n/a | n/a | Unclear | ✓ | ✓ | ✗ | High    |
| Turner et al. (2012)              | ✓ | ? | n/a | n/a | Unclear | ? | ✓ | ✗ | High    |
| Van Steenberghe-Wijnenburg (2010) | ✓ | ✗ | ?   | ?   | High    | ✓ | ✓ | ✗ | High    |
| Zuithoff et al. (2010)            | ✓ | ✓ | ?   | ?   | Unclear | ? | ✓ | ✓ | Unclear |

✓ = criterion met; ✗ = criterion not met; ? = insufficient information to code whether criterion met; n/a = not applicable



| Study                           | Patient selection: Consecutive or random sample | Patient selection: Avoid case-control / avoid artificially inflated base rate | Patient selection: Avoided inappropriate exclusions | Patient selection: Overall risk of bias | Index test: PHQ-9 interpreted blind to reference test | Index test: Was a threshold pre-specified? | Index test: If translated, appropriate translation | Index test: If translated, psychometric properties reported | Index test: Overall risk of bias |
|---------------------------------|-------------------------------------------------|-------------------------------------------------------------------------------|-----------------------------------------------------|-----------------------------------------|-------------------------------------------------------|--------------------------------------------|----------------------------------------------------|-------------------------------------------------------------|----------------------------------|
| 13. Gräfe et al. (2004)         | ✓                                               | ✓                                                                             | ✓                                                   | Low                                     | ?                                                     | ✓                                          | ✓                                                  | ✓                                                           | Unclear                          |
| 16. Kroenke et al. (2011)       | ✓                                               | ✓                                                                             | ✓                                                   | Low                                     | ✓                                                     | ✓                                          | n/a                                                | n/a                                                         | Low                              |
| 22. Navinés et al. (2012)       | ✓                                               | ✓                                                                             | ✓                                                   | Low                                     | ✓                                                     | ✓                                          | ✓                                                  | ?                                                           | Unclear                          |
| 29. Thekkumpurath et al. (2010) | ✗                                               | ✗                                                                             | ✓                                                   | High                                    | ✓                                                     | ✓                                          | n/a                                                | n/a                                                         | Low                              |
| 33. Williams et al. (2005)      | ✓                                               | ✓                                                                             | ✓                                                   | Low                                     | ?                                                     | ✓                                          | n/a                                                | n/a                                                         | Unclear                          |
| 1. Adewuya et al. (2006)        | ✓                                               | ✓                                                                             | ✗                                                   | Unclear                                 | ✓                                                     | ✓                                          | n/a                                                | n/a                                                         | Low                              |
| 2. Arroll et al. (2010)         | ✓                                               | ✓                                                                             | ✓                                                   | Low                                     | ✓                                                     | ✓                                          | n/a                                                | n/a                                                         | Low                              |
| 3. Azah et al. (2005)           | ✓                                               | ✗                                                                             | ?                                                   | High                                    | ✓                                                     | ✓                                          | ✓                                                  | ✓                                                           | Low                              |
| 4. Chagas et al. (2013)         | ✓                                               | ✓                                                                             | ✓                                                   | Low                                     | ✓                                                     | ✓                                          | ✓                                                  | ✓                                                           | Low                              |
| 6. de Lima Osorio et al. (2009) | ✓                                               | ✗                                                                             | ✓                                                   | High                                    | ?                                                     | ✗                                          | n/a                                                | n/a                                                         | High                             |
| 7. Elderon et al.               | ✓                                               | ✓                                                                             | ✓                                                   | Low                                     | ✓                                                     | ✓                                          | n/a                                                | n/a                                                         | Low                              |

(2011)

|                              |   |   |   |         |   |   |     |     |         |
|------------------------------|---|---|---|---------|---|---|-----|-----|---------|
| 8. Fann et al. (2005)        | ✓ | ✗ | ✗ | High    | ✓ | ✓ | n/a | n/a | Low     |
| 9. Fine et al. (2013)        | ✓ | ✓ | ✓ | Low     | ? | ✓ | n/a | n/a | Unclear |
| 10. Gelaye et al. (2013)     | ? | ✗ | ? | High    | ✓ | ✗ | ✓   | ?   | High    |
| 11. Gilbody et al. (2007)    | ? | ✓ | ? | Unclear | ✓ | ✓ | n/a | n/a | Low     |
| 12. Gjerdingen et al. (2009) | ✓ | ✓ | ✓ | Low     | ? | ✓ | n/a | n/a | Unclear |
| 14. Hyphantis et al. (2011)  | ✓ | ✗ | ✓ | High    | ✓ | ✓ | ?   | ?   | Unclear |
| 15. Khamseh et al. (2011)    | ✓ | ✓ | ? | Unclear | ✓ | ✓ | ✓   | ?   | Unclear |
| 19. Liu et al. (2011)        | ✓ | ✓ | ? | Unclear | ✓ | ✗ | ✓   | ?   | High    |
| 20. Lotrakul et al. (2008)   | ✗ | ✓ | ? | Unclear | ✓ | ✓ | ✓   | ?   | Unclear |
| 23. Patel et al. (2008)      | ✓ | ✓ | ✓ | Low     | ✓ | ✓ | ?   | ?   | Unclear |
| 24. Phelan et al. (2010)     | ✗ | ✓ | ✓ | High    | ✓ | ✗ | n/a | n/a | High    |
| 25. Rooney et al. (2013)     | ✓ | ✓ | ✓ | Low     | ? | ✗ | n/a | n/a | High    |
| 26. Sherina et al. (2012)    | ✓ | ✓ | ✗ | High    | ✓ | ✓ | ✓   | ✓   | Low     |
| 27. Sidebottom               | ✓ | ✓ | ✓ | Low     | ✓ | ✓ | n/a | n/a | Low     |

1  
2  
3  
4  
5  
6  
7  
8  
9  
10  
11  
12  
13  
14  
15  
16  
17  
18  
19  
20  
21  
22  
23  
24  
25  
26  
27  
28  
29  
30  
31  
32  
33  
34  
35  
36  
37  
38  
39  
40  
41  
42  
43  
44  
45  
46  
47  
48  
49

|                             |   |   |   |         |   |   |     |     |         |
|-----------------------------|---|---|---|---------|---|---|-----|-----|---------|
| et al. (2012)               |   |   |   |         |   |   |     |     |         |
| 28. Stafford et al. (2007)  | ✓ | ✓ | ✓ | Low     | ✓ | ✓ | n/a | n/a | Low     |
| 30. Thombs et al. (2008)    | ✗ | ✓ | ? | High    | ✓ | ? | n/a | n/a | Unclear |
| 32. Watnick et al. (2005)   | ? | ✗ | ✓ | High    | ✓ | ✓ | n/a | n/a | Low     |
| 34. Wittkampf et al. (2009) | ✓ | ✓ | ✓ | Low     | ✓ | ? | n/a | n/a | Unclear |
| 35. Zhang et al. (2013)     | ✓ | ✓ | ? | Unclear | ? | ✓ | ?   | ?   | Unclear |
| 36. Zuithoff et al. (2010)  | ✓ | ✓ | ✓ | Low     | ✓ | ✓ | ✓   | ?   | Unclear |

**Table 4: Quality assessment of included studies in the summed item scoring method cut-off point 10 meta-analysis (Moriarty et al., 2015)**

| Study                   | Reference test:<br>Reference test correctly classifies target condition | Reference test:<br>Reference test interpreted blind to PHQ-9 | Reference test:<br>If translated, appropriate translation | Reference test:<br>If translated, psychometric properties reported | Reference test:<br>Overall risk of bias | Flow / timing:<br>Interval of two weeks or less | Flow / timing:<br>All participants receive same reference test | Flow / timing:<br>All participants included in analysis? | Flow / timing:<br>Overall risk of bias |
|-------------------------|-------------------------------------------------------------------------|--------------------------------------------------------------|-----------------------------------------------------------|--------------------------------------------------------------------|-----------------------------------------|-------------------------------------------------|----------------------------------------------------------------|----------------------------------------------------------|----------------------------------------|
| 13. Gräfe et al. (2004) | ✓                                                                       | ?                                                            | n/a                                                       | n/a                                                                | Unclear                                 | ✓                                               | ✓                                                              | ✓                                                        | Low                                    |
| 16. Kroenke et          | ✓                                                                       | ✓                                                            | n/a                                                       | n/a                                                                | Low                                     | ✓                                               | ✓                                                              | ✓                                                        | Low                                    |

| al. (2011)                      |   |   |     |     |         |   |   |   |         |
|---------------------------------|---|---|-----|-----|---------|---|---|---|---------|
| 22. Navinés et al. (2012)       | ✓ | ✓ | ?   | ?   | Unclear | ✓ | ✓ | ✓ | Low     |
| 29. Thekkumpurath et al. (2010) | ✓ | ✓ | n/a | n/a | Low     | ? | ✓ | ✓ | Unclear |
| 33. Williams et al. (2005)      | ✓ | ? | n/a | n/a | Unclear | ? | ✓ | ✓ | Unclear |
| <hr/>                           |   |   |     |     |         |   |   |   |         |
| 1. Adewuya et al. (2006)        | ✓ | ✓ | n/a | n/a | Low     | ✓ | ✓ | ✓ | Low     |
| 2. Arroll et al. (2010)         | ✓ | ✓ | n/a | n/a | Low     | ? | ✓ | ✓ | Unclear |
| 3. Azah et al. (2005)           | ✓ | ✓ | ✓   | ✓   | Low     | ✓ | ✓ | X | High    |
| 4. Chagas et al. (2013)         | ✓ | ✓ | ?   | ?   | Unclear | ✓ | ✓ | X | High    |
| 6. de Lima Osorio et al. (2009) | ✓ | ? | n/a | n/a | Unclear | ? | ✓ | ✓ | Unclear |
| 7. Elderon et al. (2011)        | ✓ | ✓ | n/a | n/a | Low     | ✓ | ✓ | ✓ | Low     |
| 8. Fann et al. (2005)           | ✓ | ? | n/a | n/a | Unclear | ✓ | ✓ | X | High    |
| 9. Fine et al. (2013)           | ✓ | ? | n/a | n/a | Unclear | ? | ✓ | ✓ | Unclear |
| 10. Gelaye et al. (2013)        | ✓ | ✓ | ✓   | ✓   | Low     | ✓ | ✓ | X | High    |

|    |                              |   |   |     |     |         |   |   |   |         |
|----|------------------------------|---|---|-----|-----|---------|---|---|---|---------|
| 1  |                              |   |   |     |     |         |   |   |   |         |
| 2  |                              |   |   |     |     |         |   |   |   |         |
| 3  |                              |   |   |     |     |         |   |   |   |         |
| 4  |                              |   |   |     |     |         |   |   |   |         |
| 5  |                              |   |   |     |     |         |   |   |   |         |
| 6  |                              |   |   |     |     |         |   |   |   |         |
| 7  | 11. Gilbody et al. (2007)    | ✓ | ✓ | n/a | n/a | Low     | ? | ✓ | ✓ | Unclear |
| 8  |                              |   |   |     |     |         |   |   |   |         |
| 9  | 12. Gjerdingen et al. (2009) | ✓ | ? | n/a | n/a | Unclear | ✓ | ✓ | ✗ | High    |
| 10 |                              |   |   |     |     |         |   |   |   |         |
| 11 | 14. Hyphantis et al. (2011)  | ✓ | ✓ | ?   | ?   | Unclear | ✓ | ✓ | ✗ | High    |
| 12 |                              |   |   |     |     |         |   |   |   |         |
| 13 | 15. Khamseh et al. (2011)    | ✓ | ✓ | ✓   | ?   | Unclear | ✓ | ✓ | ? | Unclear |
| 14 |                              |   |   |     |     |         |   |   |   |         |
| 15 | 19. Liu et al. (2011)        | ✓ | ✓ | ✓   | ✓   | Low     | ✓ | ✓ | ? | Unclear |
| 16 |                              |   |   |     |     |         |   |   |   |         |
| 17 | 20. Lotrakul et al. (2008)   | ✓ | ✓ | ✓   | ✓   | Low     | ? | ✓ | ✗ | High    |
| 18 |                              |   |   |     |     |         |   |   |   |         |
| 19 | 23. Patel et al. (2008)      | ✓ | ✓ | ✓   | ?   | Unclear | ? | ✓ | ✗ | High    |
| 20 |                              |   |   |     |     |         |   |   |   |         |
| 21 | 24. Phelan et al. (2010)     | ✓ | ✓ | n/a | n/a | Low     | ✓ | ✓ | ✓ | Low     |
| 22 |                              |   |   |     |     |         |   |   |   |         |
| 23 | 25. Rooney et al. (2013)     | ✓ | ? | n/a | n/a | Unclear | ? | ✓ | ✗ | High    |
| 24 |                              |   |   |     |     |         |   |   |   |         |
| 25 | 26. Sherina et al. (2012)    | ✓ | ✓ | ✓   | ✓   | Low     | ✓ | ✓ | ✓ | Low     |
| 26 |                              |   |   |     |     |         |   |   |   |         |
| 27 | 27. Sidebottom et al. (2012) | ✓ | ✓ | n/a | n/a | Low     | ✓ | ✓ | ✗ | High    |
| 28 |                              |   |   |     |     |         |   |   |   |         |
| 29 | 28. Stafford et al. (2007)   | ✓ | ✓ | n/a | n/a | Low     | ✓ | ✓ | ✗ | High    |
| 30 |                              |   |   |     |     |         |   |   |   |         |
| 31 | 30. Thombs et al. (2008)     | ? | ✓ | n/a | n/a | Unclear | ✓ | ✓ | ✓ | Low     |
| 32 |                              |   |   |     |     |         |   |   |   |         |
| 33 | 32. Watnick et al. (2005)    | ✓ | ✓ | n/a | n/a | Low     | ✓ | ✓ | ✓ | Low     |
| 34 |                              |   |   |     |     |         |   |   |   |         |
| 35 | 34. Wittkamp et al. (2009)   | ✓ | ✓ | n/a | n/a | Low     | ? | ✓ | ✗ | High    |
| 36 |                              |   |   |     |     |         |   |   |   |         |
| 37 |                              |   |   |     |     |         |   |   |   |         |
| 38 |                              |   |   |     |     |         |   |   |   |         |
| 39 |                              |   |   |     |     |         |   |   |   |         |
| 40 |                              |   |   |     |     |         |   |   |   |         |
| 41 |                              |   |   |     |     |         |   |   |   |         |
| 42 |                              |   |   |     |     |         |   |   |   |         |
| 43 |                              |   |   |     |     |         |   |   |   |         |
| 44 |                              |   |   |     |     |         |   |   |   |         |
| 45 |                              |   |   |     |     |         |   |   |   |         |
| 46 |                              |   |   |     |     |         |   |   |   |         |
| 47 |                              |   |   |     |     |         |   |   |   |         |
| 48 |                              |   |   |     |     |         |   |   |   |         |
| 49 |                              |   |   |     |     |         |   |   |   |         |

|                            |   |   |   |   |         |   |   |   |         |
|----------------------------|---|---|---|---|---------|---|---|---|---------|
| 35. Zhang et al. (2013)    | ✓ | ? | ✓ | ✓ | Unclear | ✗ | ✓ | ✗ | High    |
| 36. Zuithoff et al. (2010) | ✓ | ✓ | ? | ? | Unclear | ? | ✓ | ✓ | Unclear |

**Table 5. Pooled estimates of diagnostic properties of the PHQ-9 at cut-off point 10 and using algorithm scoring method in the non-independent vs independent studies groups**

| Settings                                     | No of studies | No of patients | Sensitivity (95% CI) | Specificity (95% CI) | Pooled positive likelihood ratio (95% CI) | Pooled negative likelihood ratio (95% CI) | Diagnostic odds ratio (95% CI) | Heterogeneity: I <sup>2</sup> |
|----------------------------------------------|---------------|----------------|----------------------|----------------------|-------------------------------------------|-------------------------------------------|--------------------------------|-------------------------------|
| Manea et al, 2014 SR – RA group              | 7             | 4,065          | 0.77 (0.70 – 0.84)   | 0.94 (0.90 – 0.97)   | 14.97 (8.39 – 26.71)                      | 0.23 (0.17 - 0.31)                        | 64.40 (34.15 – 121.43)         | 78.9%                         |
| Manea et al, 2014 SR Independent studies     | 21            | 9,900          | 0.48 (0.41 – 0.91)   | 0.94 (0.91 – 0.95)   | 8.26 (6.15 – 11.09)                       | 0.54 (0.48 – 0.62)                        | 15.05 (11.03 – 20.52)          | 68.1%                         |
| Moriarty et al., 2015 SR – RA group          | 5             | 6,188          | 0.87 (0.77 – 0.93)   | 0.87 (0.76 – 0.94)   | 7.24 (3.74 – 14.03)                       | 0.14 (0.08 - 0.25)                        | 49.31 (25.74 – 94.48)          | 55.1%                         |
| Moriarty et al., 2015 SR Independent studies | 26            | 13,164         | 0.76 (0.67 – 0.83)   | 0.88 (0.85 – 0.91)   | 6.72 (5.06 – 8.92)                        | 0.26 (0.19 - 0.37)                        | 24.96 (14.81 – 42.08)          | 81.5%                         |

1  
2  
3  
4  
5  
6  
7  
8  
9  
10  
11  
12  
13  
14  
15  
16  
17  
18  
19  
20  
21  
22  
23  
24  
25  
26  
27  
28  
29  
30  
31  
32  
33  
34  
35  
36  
37  
38  
39  
40  
41  
42  
43  
44  
45  
46  
47  
48  
49

For peer review only

## Appendix 1

**Figure 1: PRISMA flowchart - search and selection of included diagnostic accuracy studies for the systematic review of studies reporting diagnostic accuracy of the PHQ-9 at using the summed items scoring method (Manea et al, 2014)**

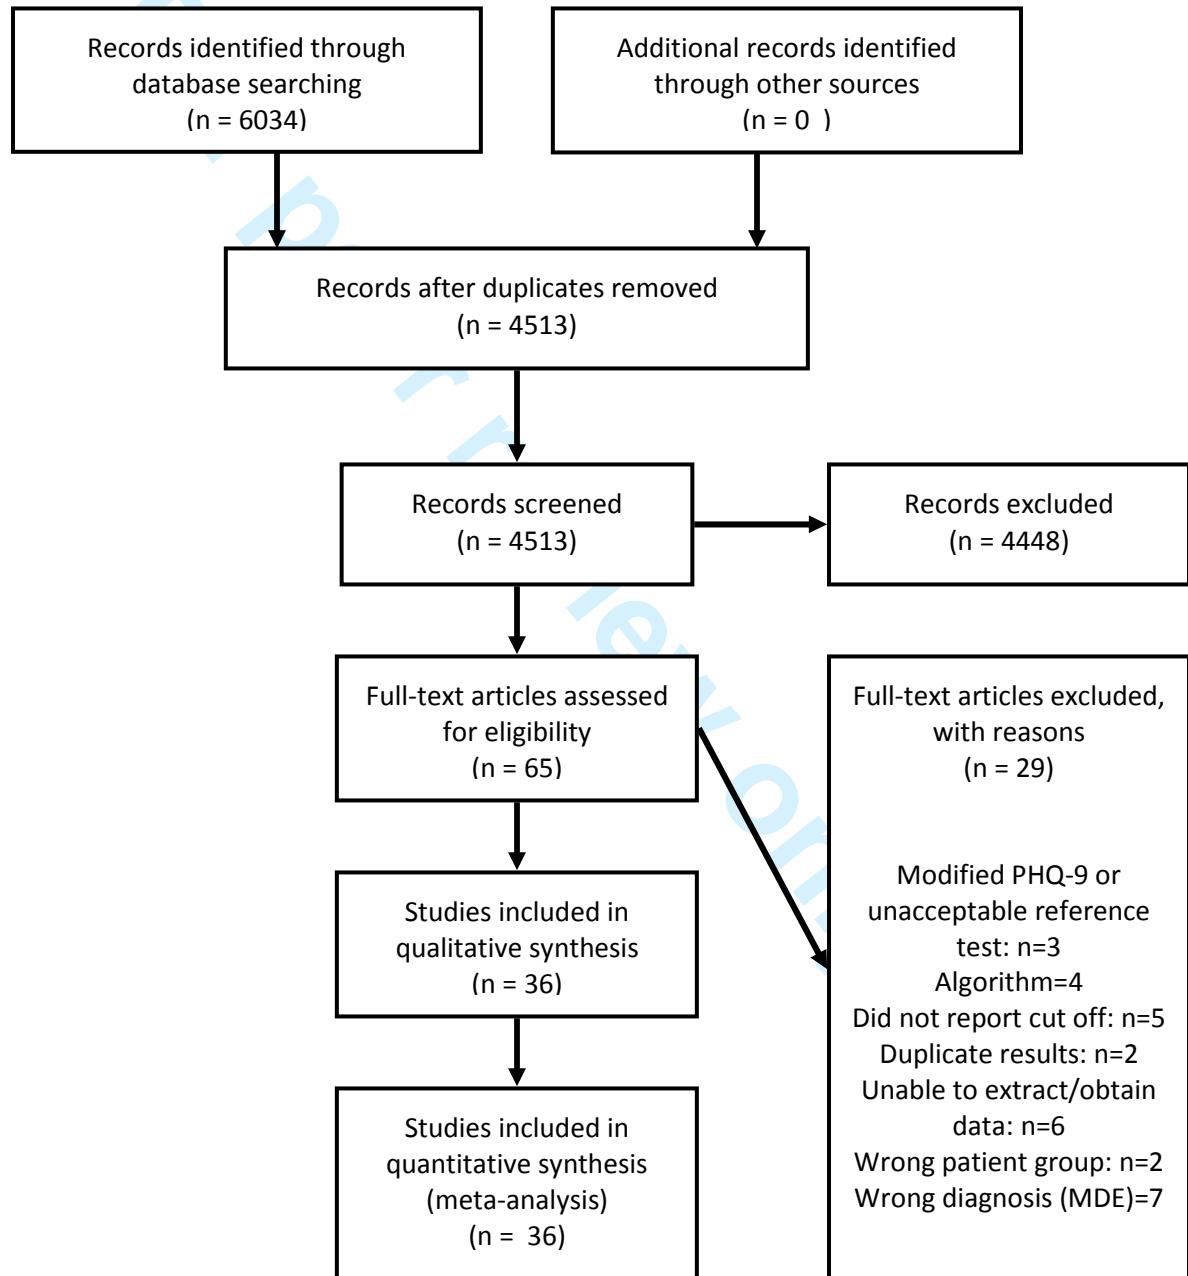



**Figure 2: PRISMA flowchart - search and selection of included diagnostic accuracy studies for the systematic review of studies reporting diagnostic accuracy of the PHQ-9 at using the algorithm scoring method (Moriarty et al., 2015)**

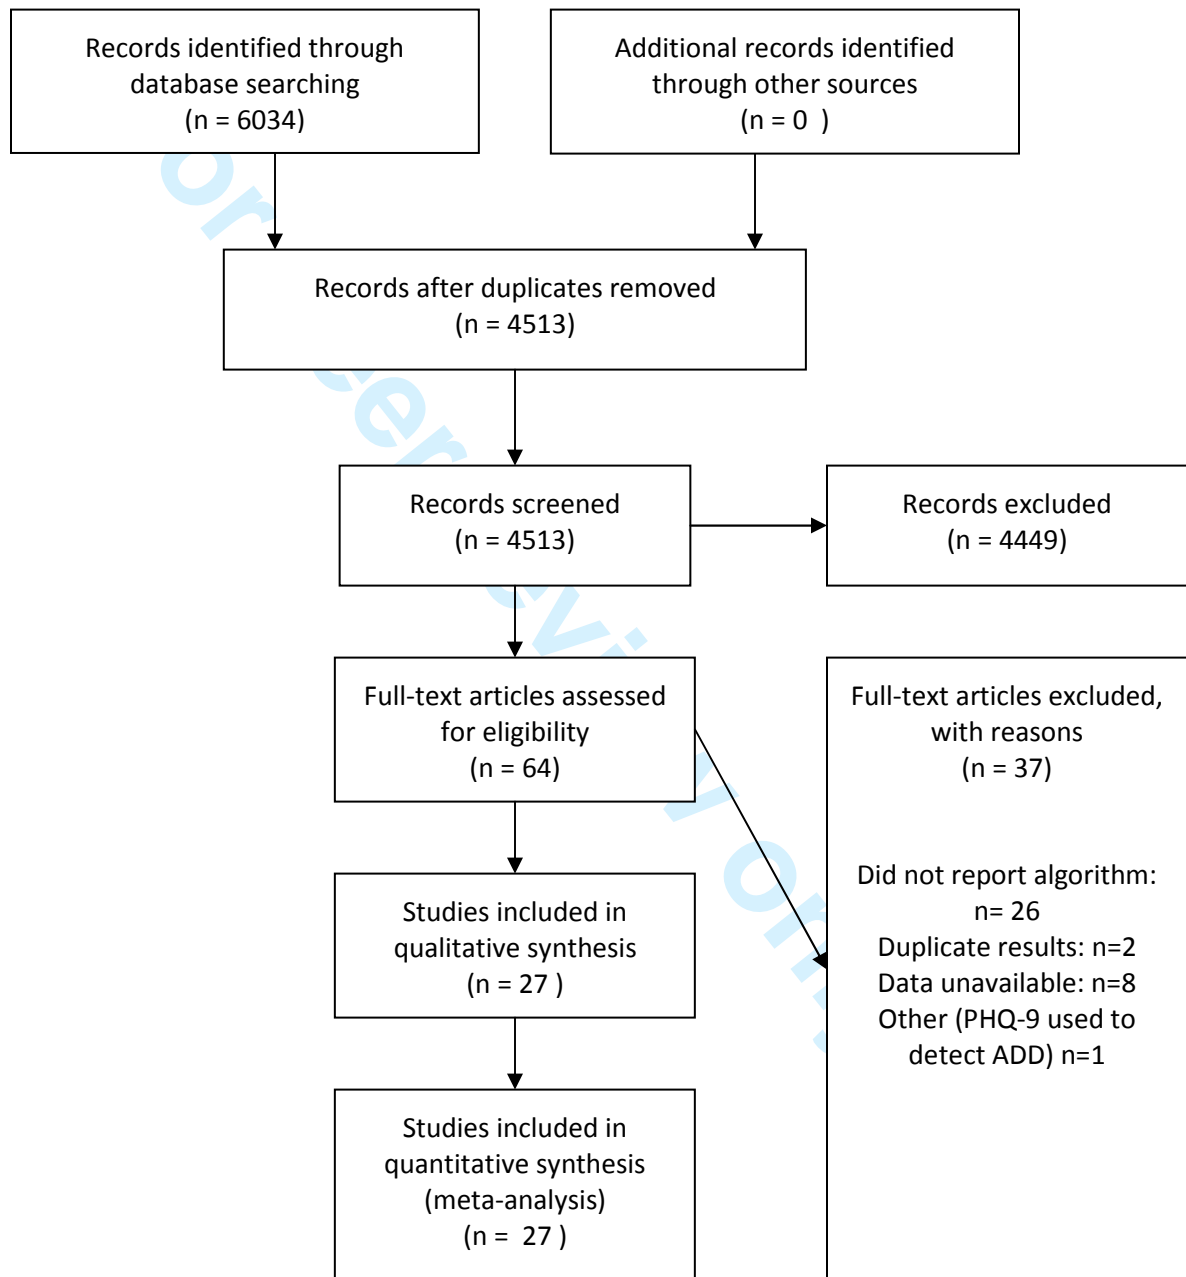

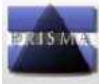

# PRISMA 2009 Checklist

1  
2  
3  
4  
5  
6  
7  
8  
9  
10  
11  
12  
13  
14  
15  
16  
17  
18  
19  
20  
21  
22  
23  
24  
25  
26  
27  
28  
29  
30  
31  
32  
33  
34  
35  
36  
37  
38  
39  
40  
41  
42  
43  
44  
45  
46  
47  
48  
49

| Section/topic                      | #  | Checklist item                                                                                                                                                                                                                                                                                              | Reported on page #                                               |
|------------------------------------|----|-------------------------------------------------------------------------------------------------------------------------------------------------------------------------------------------------------------------------------------------------------------------------------------------------------------|------------------------------------------------------------------|
| <b>TITLE</b>                       |    |                                                                                                                                                                                                                                                                                                             |                                                                  |
| Title                              | 1  | Identify the report as a systematic review, meta-analysis, or both.                                                                                                                                                                                                                                         | 1                                                                |
| <b>ABSTRACT</b>                    |    |                                                                                                                                                                                                                                                                                                             |                                                                  |
| Structured summary                 | 2  | Provide a structured summary including, as applicable: background; objectives; data sources; study eligibility criteria, participants, and interventions; study appraisal and synthesis methods; results; limitations; conclusions and implications of key findings; systematic review registration number. | 2                                                                |
| <b>INTRODUCTION</b>                |    |                                                                                                                                                                                                                                                                                                             |                                                                  |
| Rationale                          | 3  | Describe the rationale for the review in the context of what is already known.                                                                                                                                                                                                                              | 4-5                                                              |
| Objectives                         | 4  | Provide an explicit statement of questions being addressed with reference to participants, interventions, comparisons, outcomes, and study design (PICOS).                                                                                                                                                  | 5                                                                |
| <b>METHODS</b>                     |    |                                                                                                                                                                                                                                                                                                             |                                                                  |
| Protocol and registration          | 5  | Indicate if a review protocol exists, if and where it can be accessed (e.g., Web address), and, if available, provide registration information including registration number.                                                                                                                               | No                                                               |
| Eligibility criteria               | 6  | Specify study characteristics (e.g., PICOS, length of follow-up) and report characteristics (e.g., years considered, language, publication status) used as criteria for eligibility, giving rationale.                                                                                                      | 5                                                                |
| Information sources                | 7  | Describe all information sources (e.g., databases with dates of coverage, contact with study authors to identify additional studies) in the search and date last searched.                                                                                                                                  | 5                                                                |
| Search                             | 8  | Present full electronic search strategy for at least one database, including any limits used, such that it could be repeated.                                                                                                                                                                               | Available online (see Manea et al., 2015; Moriarty et al., 2015) |
| Study selection                    | 9  | State the process for selecting studies (i.e., screening, eligibility, included in systematic review, and, if applicable, included in the meta-analysis).                                                                                                                                                   | 5                                                                |
| Data collection process            | 10 | Describe method of data extraction from reports (e.g., piloted forms, independently, in duplicate) and any processes for obtaining and confirming data from investigators.                                                                                                                                  | 6                                                                |
| Data items                         | 11 | List and define all variables for which data were sought (e.g., PICOS, funding sources) and any assumptions and simplifications made.                                                                                                                                                                       | 5-6                                                              |
| Risk of bias in individual studies | 12 | Describe methods used for assessing risk of bias of individual studies (including specification of whether this was done at the study or outcome level), and how this information is to be used in any data synthesis.                                                                                      | 6                                                                |

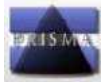

# PRISMA 2009 Checklist

|                      |    |                                                                                                                                                           |   |
|----------------------|----|-----------------------------------------------------------------------------------------------------------------------------------------------------------|---|
| Summary measures     | 13 | State the principal summary measures (e.g., risk ratio, difference in means).                                                                             | 6 |
| Synthesis of results | 14 | Describe the methods of handling data and combining results of studies, if done, including measures of consistency (e.g., $I^2$ ) for each meta-analysis. | 6 |

Page 1 of 2

| Section/topic                 | #  | Checklist item                                                                                                                                                                                           | Reported on page # |
|-------------------------------|----|----------------------------------------------------------------------------------------------------------------------------------------------------------------------------------------------------------|--------------------|
| Risk of bias across studies   | 15 | Specify any assessment of risk of bias that may affect the cumulative evidence (e.g., publication bias, selective reporting within studies).                                                             | 6, 21              |
| Additional analyses           | 16 | Describe methods of additional analyses (e.g., sensitivity or subgroup analyses, meta-regression), if done, indicating which were pre-specified.                                                         | 6                  |
| <b>RESULTS</b>                |    |                                                                                                                                                                                                          |                    |
| Study selection               | 17 | Give numbers of studies screened, assessed for eligibility, and included in the review, with reasons for exclusions at each stage, ideally with a flow diagram.                                          | Appendix           |
| Study characteristics         | 18 | For each study, present characteristics for which data were extracted (e.g., study size, PICOS, follow-up period) and provide the citations.                                                             | Tables 1 and 2     |
| Risk of bias within studies   | 19 | Present data on risk of bias of each study and, if available, any outcome level assessment (see item 12).                                                                                                | Tables 3 and 4     |
| Results of individual studies | 20 | For all outcomes considered (benefits or harms), present, for each study: (a) simple summary data for each intervention group (b) effect estimates and confidence intervals, ideally with a forest plot. | N/A                |
| Synthesis of results          | 21 | Present results of each meta-analysis done, including confidence intervals and measures of consistency.                                                                                                  | Table 5            |
| Risk of bias across studies   | 22 | Present results of any assessment of risk of bias across studies (see Item 15).                                                                                                                          | Tables 3 and 4     |
| Additional analysis           | 23 | Give results of additional analyses, if done (e.g., sensitivity or subgroup analyses, meta-regression [see Item 16]).                                                                                    | 11 and 17          |
| <b>DISCUSSION</b>             |    |                                                                                                                                                                                                          |                    |
| Summary of evidence           | 24 | Summarize the main findings including the strength of evidence for each main outcome; consider their relevance to key groups (e.g., healthcare providers, users, and policy makers).                     | 17-21              |
| Limitations                   | 25 | Discuss limitations at study and outcome level (e.g., risk of bias), and at review-level (e.g., incomplete retrieval of identified research, reporting bias).                                            | 21                 |
| Conclusions                   | 26 | Provide a general interpretation of the results in the context of other evidence, and implications for future research.                                                                                  | 21-22              |
| <b>FUNDING</b>                |    |                                                                                                                                                                                                          |                    |

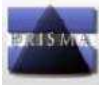

# PRISMA 2009 Checklist

|         |    |                                                                                                                                            |    |
|---------|----|--------------------------------------------------------------------------------------------------------------------------------------------|----|
| Funding | 27 | Describe sources of funding for the systematic review and other support (e.g., supply of data); role of funders for the systematic review. | 23 |
|---------|----|--------------------------------------------------------------------------------------------------------------------------------------------|----|

From: Moher D, Liberati A, Tetzlaff J, Altman DG, The PRISMA Group (2009). Preferred Reporting Items for Systematic Reviews and Meta-Analyses: The PRISMA Statement. PLoS Med 6(6): e1000097. doi:10.1371/journal.pmed1000097

For more information, visit: [www.prisma-statement.org](http://www.prisma-statement.org).

Page 2 of 2

For peer review only

# BMJ Open

## Are there researcher allegiance effects in diagnostic validation studies of the PHQ-9? A systematic review and meta-analysis

|                                 |                                                                                                                                                                                                                                                                                                     |
|---------------------------------|-----------------------------------------------------------------------------------------------------------------------------------------------------------------------------------------------------------------------------------------------------------------------------------------------------|
| Journal:                        | <i>BMJ Open</i>                                                                                                                                                                                                                                                                                     |
| Manuscript ID                   | bmjopen-2016-015247.R1                                                                                                                                                                                                                                                                              |
| Article Type:                   | Research                                                                                                                                                                                                                                                                                            |
| Date Submitted by the Author:   | 08-May-2017                                                                                                                                                                                                                                                                                         |
| Complete List of Authors:       | Manea, Laura; University of York, Health Sciences<br>Boehnke, Jan Rasmus; University of York<br>Gilbody, Simon; The University of York, Department of Health Sciences<br>Moriarty, Andrew; University of York, Health Sciences<br>McMillan, Dean; University of York, Department of Health Sciences |
| <b>Primary Subject Heading</b>: | Mental health                                                                                                                                                                                                                                                                                       |
| Secondary Subject Heading:      | Diagnostics                                                                                                                                                                                                                                                                                         |
| Keywords:                       | Depression & mood disorders < PSYCHIATRY, Screening, PHQ-9, diagnostic meta-analysis, allegiance effect                                                                                                                                                                                             |
|                                 |                                                                                                                                                                                                                                                                                                     |

SCHOLARONE™  
Manuscripts

1  
2  
3  
4  
5  
6  
7  
8  
9  
10  
11  
12  
13  
14  
15  
16  
17  
18  
19  
20  
21  
22  
23  
24  
25  
26  
27  
28  
29  
30  
31  
32  
33  
34  
35  
36  
37  
38  
39  
40  
41  
42  
43  
44  
45  
46  
47  
48  
49

1 **Are there researcher allegiance effects in diagnostic validation studies of the PHQ-9? A systematic review and meta-analysis**

2

3 Laura Manea MMedSci MRCPsych\*, Jan R. Boehnke PhD, Simon Gilbody DPhil FRCPsych FRSA, Andrew S. Moriarty MRes, Dean  
4 McMillan PhD

5

6 \*Corresponding Author

7 Hull York Medical School and Department of Health Sciences, ARRC Building, University of York, YO10 5DD

8 Email: [laura.manea@york.ac.uk](mailto:laura.manea@york.ac.uk)

9

10

11

12

13

14

15

For peer review only

1  
2  
3  
4  
5 166  
7 178  
9 1810  
11 1912  
13 2014  
15 2116  
17 2218  
19 23 **Abstract**

20 24 **Objectives** To investigate whether an authorship effect is found that leads to better performance in studies conducted by the original developers  
21 25 of the PHQ-9 (allegiant studies).

22 26 **Design** Systematic review with random effects bivariate diagnostic meta-analysis. Search strategies included electronic databases, examination  
23 27 of reference lists, and forward citation searches.

24 28 **Inclusion criteria** Included studies provided sufficient data to calculate the diagnostic accuracy of the PHQ-9 against a gold standard diagnosis  
25 29 of major depression using the algorithm or the summed item scoring method at cut-off point 10.

26 30 **Data extraction** Descriptive information, methodological quality criteria, and 2×2 contingency tables.

27 31 **Results**

1  
2  
3  
4  
5 32 Seven allegiant and twenty independent studies reported the diagnostic performance of the PHQ-9 using the algorithm scoring method. Pooled  
6  
7 33 diagnostic odds ratio (DOR) for the allegiant group was 64.40, and 15.05 for non-allegiant studies group. The allegiance status was a significant  
8  
9 34 predictor of DOR variation ( $p < 0.0001$ ).

10  
11 35 Five allegiant studies and twenty-six non-allegiant studies reported the performance of the PHQ-9 at recommended cut-off point of 10. Pooled  
12  
13 36 DOR for the allegiant group was 49.31, and 24.96 for the non-allegiant studies. The allegiance status was a significant predictor of DOR  
14  
15 37 variation ( $P = 0.015$ ).

16  
17 38 Some potential alternative explanations for the observed authorship effect including differences in study characteristics and quality were found,  
18  
19 39 though it is not clear how some of them account for the observed differences

20  
21 40

## 22 23 41 **Conclusions**

24  
25  
26 42 Allegiant studies reported better performance of the PHQ-9. Allegiance status was predictive of variation in the DOR. Based on the observed  
27  
28 43 differences between independent and non-independent studies we were unable to conclude or exclude that allegiance effects are present in  
29  
30 44 studies examining the diagnostic performance of the PHQ-9. This study highlights the need for future meta-analyses of diagnostic validation  
31  
32 45 studies of psychological measures to evaluate the impact of researcher allegiance in the primary studies.

33  
34 46

35  
36 47

## 37 38 48 **Strengths and limitations of this study**

39  
40 49



- 1  
2  
3  
4  
5 50 a) An original study—the first meta-analysis of diagnostic validation studies of psychological measures to evaluate the impact of researcher  
6 allegiance.  
7 51  
8 b) Using rigorous methodology—strict inclusion/exclusion and quality assessment criteria.  
9 52  
10 53 c) We found that the allegiance effect was a significant predictor of the variation of the diagnostic odds ratio in the meta-regression  
11 analysis.  
12 54  
13 55 d) Substantial variability observed in methodological quality of included studies.  
14  
15 56 e) Based on the observed methodological differences between the independent and non-independent studies we were unable to conclude or  
16  
17 57 exclude that allegiance effects are present in studies examining the diagnostic performance of the PHQ-9.  
18  
19 58  
20  
21 59  
22  
23 60  
24  
25 61  
26  
27 62  
28  
29 63  
30  
31 64  
32  
33 65  
34  
35 66  
36  
37  
38  
39  
40  
41  
42  
43  
44  
45  
46  
47  
48  
49

1  
2  
3  
4  
5 67 Research on allegiance effects has a long tradition in psychotherapy research. In this context *allegiance* describes the phenomenon that  
6  
7 68 researchers and clinicians who developed a treatment approach or are for other reasons invested in it tend to find larger effect sizes in favour of  
8  
9 69 their treatment than for comparison groups. [1] This finding has been extensively replicated [2], [3] and is also robust when the quality of  
10  
11 70 research is controlled for. Researcher allegiance is subject of on-going debates about the design of efficacy studies as well as implications for  
12  
13 71 policy. [2], [4], [5] Researcher allegiance is also discussed widely in the literature on experimental as well as evaluation research. [6] Since the  
14  
15 72 motivational underpinnings of allegiance effects are potentially far more ingrained into human behaviour and decision making than previously  
16  
17 73 thought (e.g., [7]), they may occur commonly in clinical research in general.

18 74 Although it has been suggested that allegiance effects may play a role in the validation of psychological screening and case-finding tools (e.g.,  
19  
20 75 O'Shea et al., in press), systematic evaluations of this hypothesis are rare and studies that acknowledge potential allegiance effects in such  
21  
22 76 studies mainly come from forensic psychology and psychiatry backgrounds. [8]–[11] Diagnostic validation studies are geared at establishing the  
23  
24 77 sensitivity and specificity of a screening or case finding tool, which is used in practice to differentiate cases from non-cases or to decide about  
25  
26 78 whether further assessment or treatment is indicated or will be offered. An allegiance effect in such studies would be seen in systematically  
27  
28 79 higher sensitivities or specificities if the original author(s) is (are) part of the team of such a study. Such a bias would have a deleterious affect on  
29  
30 80 practice through promising over-optimistic accuracy of the screening or case finding tool or in evaluating the cost-effectiveness of the measure  
31  
32 81 in a screening or case-finding context.

33 82 The depression module of the Patient Health Questionnaire (PHQ-9) is a widely used depression-screening instrument in non-psychiatric  
34  
35 83 settings. The PHQ-9 was developed by a team of researchers, with its development underwritten by an educational grant from Pfizer US  
36  
37 84 Pharmaceuticals. [12] The PHQ-9 can be scored using different methods, including an algorithm based on DSM-IV criteria and a cut-off based  
38  
39 85 on summed-item scores. The psychometric properties of these two approaches have been summarised in two recently published meta-analyses.  
40  
41 86 [13], [14] The goal of the current review is to investigate, based on an established database of PHQ-9 diagnostic validation studies [13], [14],  
42  
43  
44  
45  
46  
47  
48  
49

1  
2  
3  
4  
5 87 whether an allegiance effect is found that leads to an increased sensitivity and specificity in studies that were conducted by researchers closely  
6  
7 88 connected to the original developers of the instrument.

8  
9 89 METHODS

10  
11 90 *Study Selection*

12  
13  
14 91 Similar search strategies were used in both systematic reviews. (For full details please see Manea et al. (2014) and Moriarty et al. (2015)).  
15  
16 92 Embase, MEDLine and PSYCHInfo were searched from 1999 (when the PHQ-9 was first developed) to August 2013 [13] and September 2013  
17  
18 93 [14] respectively, using the terms “PHQ-9”, “PHQ”, “PHQ\$” and “patient health questionnaire”. The search strategy is presented in Appendix 2.  
19  
20 94 The reference lists of studies fitting the inclusion criteria were manually searched and a reverse citation search in Web of Science was  
21  
22 95 performed. Authors of unpublished studies were contacted and conference abstracts were reviewed in an attempt to minimise publication bias.

23  
24 96 The following inclusion-exclusion criteria were used:

25  
26 97 *Population:* Adult population. *Instrument:* Studies that used the PHQ-9. *Comparison (reference standard):* The accuracy of the PHQ-9 had to be  
27  
28 98 assessed against a recognised gold-standard instrument for the diagnosis of either Diagnostic and Statistical Manual (DSM) or International  
29  
30 99 Classification of Disease (ICD) criteria for major depression. Studies were included if the diagnoses were made using a standardised diagnostic  
31  
32 100 structured interview schedule (e.g. Mini International Neuropsychiatric Interview (MINI), Structured Clinical Interview for DSM Disorders  
33  
34 101 (SCID)). Unguided clinician diagnoses with no reference to a standard structured diagnostic schedule or comparisons of the PHQ-9 with other  
35  
36 102 self-report measures were excluded. Studies were also excluded if the target diagnosis was not major depressive disorder (MDD, e.g. any  
37  
38 103 depressive disorder). *Outcome:* Studies had to report sufficient information to calculate a 2\*2 contingency table for the algorithm or the  
39  
40 104 recommended cut-off point 10. *Study design:* Any design. *Additional criterion:* We avoided double counting of evidence by ensuring that only

1  
2  
3  
4  
5 105 one study of those that reported overlapping datasets in different journals were included in the meta-analysis. Citations with overlapping samples  
6 106 were examined to establish whether they contained information relevant to the research question that was not contained in the included report.

7  
8  
9 107 *Quality assessment*

10  
11 108 Quality assessment was performed using the QUADAS-2 tool, a tool for evaluating the risk of bias and applicability of primary diagnostic  
12 109 accuracy studies when conducting diagnostic systematic reviews. [15] It covers the areas of: patient selection, index test, reference standard and  
13 110 flow and timing. [16] This tool was adapted for the two reviews and quality assessments were carried out by two independent reviewers for all  
14 111 studies included in the reviews.

15  
16  
17  
18  
19 112 *Data synthesis and statistical analysis*

20  
21 113 We constructed 2x2 tables for cut-off point 10 [14] and the algorithm scoring method [13] Pooled estimates of sensitivity, specificity,  
22 114 positive/negative likelihood ratios, and diagnostic odds ratios were calculated using random effects bivariate meta-analysis. [17] Heterogeneity  
23 115 was assessed using  $I^2$  for the diagnostic odds ratio, an estimate of the proportion of study variability that is due to between-study variability  
24 116 rather than sampling error. We considered values of  $\geq 50\%$  to indicate substantial heterogeneity.[18] Summary Receiver Operator Characteristic  
25 117 curves (sROC) were constructed using the bivariate model to produce a 95% confidence ellipse within ROC space. [19] Each data point in the  
26 118 summary ROC space represents a separate study, unlike a traditional ROC plot, which explores the effect varying thresholds on sensitivity and  
27 119 specificity in a single study.

28  
29  
30 120 We undertook a meta-regression analysis of logit diagnostic odds ratio using research allegiance as covariate in the meta-regression model. [20],  
31 121 [21] Analyses were conducted using STATA version 12, with the metan, metandi and metareg user-written commands.

32  
33  
34  
35  
36  
37  
38 122 *Allegiance Rating*

1  
2  
3  
4  
5 123 We rated authorship on a paper if any of the developers of the PHQ-9 - Kurt Kroenke, MD, Robert L Spitzer, MD, and Janet B W Williams – as  
6  
7 124 an indicator of potential allegiance. We also rated as evidence of allegiance as acknowledged collaborations with the developers of the PHQ-9,  
8  
9 125 even if they were not listed as co-authors or if the authors acknowledged funding from Pfizer to conduct the study.

10  
11 126

## 12 127 RESULTS

13  
14  
15  
16 128

### 17 18 129 **Overview of included studies**

19  
20  
21 130 31 studies reported the diagnostic properties of the PHQ-9 at cut-off point 10 or above and were included in this analysis. [14] 27 studies were  
22  
23 131 included in the algorithm review [13]. The study selection flowcharts can be found in Appendix 1 (figures 1 and 2). The characteristics of these  
24  
25 132 studies are reported in tables 1 and 2 and the results of the methodological assessment are presented in tables 3 and 4.

### 26 27 133 **Algorithm scoring method**

28  
29 134

#### 30 31 135 Descriptive characteristics

32  
33  
34 136 The descriptive characteristics of the included studies are presented in table 1. Seven individual studies that reported the diagnostic performance  
35  
36 137 of the PHQ-9 using the algorithm scoring method were co-authored by the original developers of the PHQ-9 [22]–[26], specifically  
37  
38 138 acknowledged one of the developers and support by an educational grant from Pfizer US [27], or were co-authored by the first author of a

1  
2  
3  
4  
5 139 previous study that had also been co-authored by one of the developers [28]. Twenty non-allegiant studies reported the diagnostic properties of  
6  
7 140 the PHQ-9 using the algorithm scoring method.

8  
9 141

10  
11 142 Three (43%, 3/7) of the allegiant studies were conducted exclusively in hospital settings [22], [26], [28]. The remaining four studies (67%, 4/7)  
12  
13 143 were conducted in different settings or non-exclusively hospital settings: one in primary care [25] and three in mixed settings: psycho-somatic  
14  
15 144 walk in clinics and family practices [23]<sup>1</sup>, outpatient clinics and family practices [24] and primary care and hospital settings [27]. In the non-  
16  
17 145 allegiant group, thirteen (65%, 13/20) studies were conducted in hospital settings [29]–[41]. Of the remaining seven studies, six were conducted  
18  
19 146 in primary care settings [42]–[47] and one in a community sample [48].

20  
21 147 In both groups (non-allegiant and allegiant studies), the majority of studies validated a translated version of the PHQ-9. Two of the studies  
22  
23 148 authored by developers (28%, 2/7) [25], [26], and eight (40%, 8/20) allegiant studies [29], [30], [37]–[40], [42], [48] were conducted in English.

24  
25 149 The mean prevalence of major depressive disorder in the group of allegiant studies was 13.4 % (range 6.1% - 29.2%); in the non-allegiant group  
26  
27 150 it was 15.5% (range 3.9% - 32.4%). The mean age of patients in the PHQ-9 developers group was 45.7; all but one study had a mean age in the  
28  
29 151 range of 40 to 50 years. In the non-allegiant group the mean age was 54.6 (range 29.3 – 75.0), with almost half (8) of the studies reporting a  
30  
31 152 mean age of over 60. The percentage of females in the PHQ-9 developers was 56.8% (range 28.6% - 67.8%) and in the non-allegiant group was  
32  
33 153 59.1 (18% -100%).

34 154  
35  
36  
37  
38

---

39  
40  
41  
42  
43  
44  
45  
46  
47  
48  
49  
<sup>1</sup> This study provided separate estimates for the two settings in which it was conducted; therefore separate psychometric estimates were generated for each sample for both algorithm scoring method and summed items scoring method at cut-off point 10 (see below).

1  
2  
3  
4  
5 155 All allegiant studies used a self-reported PHQ-9, whereas in 7 non-allegiant studies (30%, 6/20) the PHQ-9 was administered by a researcher  
6 156 [30]–[33], [43], [48]. Apart from Muramatsu et al. (2007) all allegiant studies used the SCID as a gold standard; the non-allegiant studies used a  
7  
8 157 wider range of gold standards including SCAN, CIDI, MINI, and C-DIS, though the SCID was also frequently used by the independent studies  
9 158 as well (45%, 9/20 studies).

10  
11  
12 159 Four out of the seven allegiant studies (57%) did not include a conflict of interests statement [22], [23], [25], [27]. Also, four (57%) of the  
13 160 allegiant studies acknowledged funding from Pfizer [23]–[25], [27]. Only one study [27] acknowledged the collaboration with one of the  
14 161 developers of the PHQ-9.

15  
16  
17 162 Of the non-allegiant studies, twelve (60%) did not include a conflict of interests statement [29]–[32], [35]–[37], [39], [45], [46], [48], [49]. It  
18 163 appears that newer studies were more likely to include a conflict of interest statement, which may reflect a recent change in reporting. Funding  
19 164 was acknowledged by most studies (18/20) and most received funding from academic or/and health research institutions. Two studies received  
20 165 funding from pharmaceutical companies – Lundbeck [43] and Pfizer [35] and one study acknowledged that Pfizer Italia provided the Italian  
21 166 version of PHQ-9 and gave the authors permission to use it [36].

22  
23  
24  
25  
26  
27 167 Diagnostic test accuracy

28  
29  
30 168 Pooled sensitivity and specificity was calculated separately for the non-allegiant and allegiant studies. Pooled sensitivity for the allegiant studies  
31 169 of the PHQ-9 was 0.77 (95% CI = 0.70 – 0.84), pooled specificity was 0.94 (95% CI = 0.90 – 0.97), and the pooled diagnostic odds ratio was  
32 170 64.40 (95% CI = 34.15 – 121.43). Heterogeneity was high ( $I^2 = 78.9\%$ ). Figure 1 represents the summary ROCs for this set of studies.

33  
34  
35  
36 171

37  
38 172  
39  
40  
41  
42  
43  
44  
45

1  
2  
3  
4  
5 173 -----  
6  
7  
8 174 Figure 1. PHQ-9 algorithm scoring method summary ROC plot for the diagnosis of major depressive disorder in allegiant studies (Panel A) and  
9 175 non-allegiant studies (Panel B). Pooled sensitivity and specificity estimates using a bi-variate meta-analysis (*HSROC* hierarchical receiver-  
10 176 operating characteristic).  
11  
12  
13 177 -----  
14

15  
16 178  
17  
18 179  
19  
20 180 Pooled sensitivity for the non-allegiant studies was lower compared to the developer authored studies group at 0.48 (95% CI = 0.41 – 0.91),  
21 181 pooled specificity was the same at 0.94 (95% CI = 0.91 – 0.95). The pooled diagnostic odds ratio was approximately four times lower at 15.05  
22 182 (95% CI = 11.03 – 20.52) (see figure 1). Heterogeneity was substantial at  $I^2 = 68.1\%$ .  
23  
24  
25

26 183

27  
28 184

29  
30  
31 185 The meta-regression analysis for algorithm studies with non-allegiant status as the predictor of the diagnostic odds ratio showed that non-  
32 186 allegiant status was a significant predictor of the diagnostic odds ratio ( $p < 0.0001$ ) and explained a substantial amount of the observed  
33 187 heterogeneity (51.5%).  
34  
35

36  
37 188

38  
39 189 Quality assessment  
40  
41  
42  
43  
44  
45



1  
2  
3  
4  
5 190 The results of the quality assessment using QUADAS-2 are given in table 3 for the studies reporting on the diagnostic performance of the  
6  
7 191 algorithm scoring method. In the patient selection domain, more non-allegiant studies (65%, 13/20) than allegiant (29%, 2/7) met the criterion  
8  
9 192 for consecutive referrals. There were no marked differences on the other two criteria in this domain (avoid case-control design, avoid  
10 193 inappropriate exclusions). In the index test domain, the proportion of studies reporting that the PHQ-9 was conducted blind to the reference test  
11 194 was comparable between the two groups. There were differences in this domain for those studies using a translated version of the test. All non-  
12 195 English allegiant studies (5/5) used an appropriately translated version of the PHQ-9; whereas just over a half of the non-allegiant studies  
13 196 reported this (55%, 6/11). However, the majority of both sets of studies did not report details of psychometric properties of the translated  
14 197 version. For the reference test domain, nearly all studies in both groups were rated as using a reference test that would correctly classify the  
15 198 condition. While most allegiant studies reported that the reference test was interpreted blind to the PHQ-9 score (86%, 6/7), this was reported in  
16 199 only 60% (12/20) of the non-allegiant studies.

17  
18  
19  
20  
21  
22 200 The two sets of studies that used translated versions of the reference test were broadly comparable. There was a slight indication that the  
23 201 allegiant studies were more likely to use an appropriately translated version of the reference test and report data on the psychometric properties  
24 202 of the translated version, though the numbers for the translated comparison are very low. There were, however, some more notable differences  
25 203 on the flow and timing domain. Most allegiant studies ensured that the time between the index and reference test was under two weeks (86%,  
26 204 6/7) in comparison to 70% (14/20) of the non-allegiant studies. More allegiant studies met the criterion for 'all participants included in the  
27 205 analysis' (57%, 4/7) than non-allegiant studies (25%).  
28  
29  
30  
31  
32

33 206

34  
35  
36 207 **Summed items scoring method (cut-off point 10 or above)**

37  
38 208

39  
40  
41  
42  
43  
44  
45

1  
2  
3  
4  
5 209 Descriptive characteristics  
6

7  
8 210 Table 2 presents the sample characteristics of the thirty-one PHQ-9 validation studies that reported the psychometric properties of the PHQ-9 at  
9 211 cut-off point 10 or above. Five of these studies were co-authored by the original developers of the instrument or acknowledged collaboration  
10 212 [12], [23], [26], [50] or were co-authored by the first author of a previous study that had also been co-authored by one of the developers [28].  
11 213 Twenty-six studies were conducted by independent researchers.  
12  
13  
14

15 214

16  
17 215 Three (60%, 3/5) allegiant studies [26], [28], [50] and eleven non-allegiant studies (42%, 11/26) [30]–[32], [34], [37], [38], [51]–[55] were  
18 216 conducted in hospital settings.  
19  
20

21 217

22  
23  
24 218 Three (60%, 3/5) allegiant studies [12], [26], [50] and thirteen non-allegiant studies (13/26) [30], [37], [38], [42], [48], [52]–[54], [56]–[60], were  
25 219 conducted in English.  
26  
27

28 220

29  
30  
31 221 The mean prevalence of major depressive disorder in the allegiant group was 13.2% (range 6.1% - 33.5%) and in the non-allegiant group was  
32 222 16.1% (range 2.5% - 43.2%). The mean age of patients in the allegiant group studies was 48.1 (range 41.9 -61.0) and in the 26 non-allegiant  
33 223 studies that reported these data was 49.1 (range 23.0 – 78.0). The percentage of females in the allegiant studies that reported these data [12],  
34 224 [23], [26], [28] was 56.3% (range 28.6% – 67.8%) and in the non-allegiant group was 64.9 % (range 12% -100%).  
35  
36  
37

38 225  
39  
40  
41  
42  
43  
44  
45

1  
2  
3  
4  
5 226 Three allegiant studies used the self-reported mode of administration and two of them did not specify how the PHQ-9 was administered. In 9  
6  
7 227 non-allegiant studies (34%, 9/26) the PHQ-9 was administered by the researcher [30]–[32], [48], [57], [59]–[62]. All allegiant studies used SCID  
8  
9 228 as a gold standard; the non-allegiant studies used a wider range of gold standards including SCAN, CIDI, MINI, CIS-R, C-DIS, though the SCID  
10 229 was used in half of the studies (50%, 13/26 studies).

11  
12 230 Three allegiant studies (60%) did not include a conflict of interests statement [12], [23], [50]. Two of these studies [12], [23] acknowledged  
13 231 funding from Pfizer. None of the allegiant studies acknowledged collaboration or authorship of one of the developers of the PHQ-9.

14  
15  
16  
17 232 Of the non-allegiant studies, thirteen (42%) did not include a conflict of interests statement [30]–[32], [37], [42], [46], [48], [54], [56], [61],  
18 233 [63]–[65]. Similar to the algorithm studies, the newer studies were more likely to include a conflict of interest statement. Funding was  
19 234 acknowledged by most studies (27/31) and most received funding from academic or/and health research institutions. One study [58]  
20 235 acknowledged that the last author involved in the development of one of the instruments (CORE-OM), ‘but does not gain financially from its  
21 236 use’. One study [52] acknowledged funding from industry, AHA Pharmaceuticals Roundtable, but stated that ‘the funding organisations had no  
22 237 role in the design or conduct of the study, collection, management, analysis or interpretation of data; or preparation, review or approval of the  
23 238 manuscript. Fine et al., 2013 disclosed that the last author had financial and consulting interests (Pfizer was not cited as one of them).  
24  
25  
26  
27  
28  
29

#### 30 240 *Diagnostic test accuracy*

31  
32 241 Pooled sensitivity of allegiant studies was 0.87 (95% CI = 0.77 – 0.93), pooled specificity was 0.87 (95% CI = 0.76 – 0.94), and the pooled  
33 242 diagnostic odds ratio was 49.31 (95% CI = 25.74 – 94.48) – see table 5. Heterogeneity was moderate ( $I^2 = 55.1\%$ ). Figure 2 represents the  
34 243 summary ROCs for this group.  
35  
36  
37  
38  
39  
40  
41  
42  
43  
44  
45

1  
2  
3  
4  
5 246

6 -----  
7 247 Figure 2. PHQ-9 summed items scoring method at cut-off point 10 summary ROC plot for diagnosis of major depressive disorder in allegiant  
8 248 studies (panel A) and non-allegiant studies (panel B). Pooled sensitivity and specificity using a bi-variate meta-analysis (*HSROC* hierarchical  
9 249 receiver-operating characteristic).  
10 -----

11 250

12 -----  
13  
14 251 Pooled sensitivity of non-allegiant studies was 0.76 (95% CI, 0.67 – 0.83), pooled specificity was 0.88 95% CI (0.85 – 0.91), and the pooled  
15 252 diagnostic odds ratio was 24.96 (95% CI 14.81 – 42.08), approximately half that of the allegiant studies (table 2). Heterogeneity was high at  $I^2 =$   
16  
17 253 81.5 %. Figure 2 represents the summary ROCs for this group.  
18  
19

20 254  
21  
22  
23  
24  
25  
26  
27  
28  
29  
30  
31  
32  
33  
34  
35  
36  
37  
38  
39  
40  
41  
42  
43  
44  
45

1  
2  
3  
4  
5 255 The meta-regression for the studies using a cut-off point of 10 or above with allegiance status of the predictor showed that allegiance status was  
6 256 a significant predictor of the diagnostic odds ratio ( $P = 0.015$ ) and explained 19.0% of observed heterogeneity.

7  
8  
9 257

10  
11 258 *Quality assessment*

12  
13  
14 259 The results of the quality assessment using the QUADAS-2 are given in table 4. For the patient selection domain, the two groups of studies were  
15 260 broadly comparable on two items (consecutive or random sample, avoid case-control design). However, all allegiant studies were rated as  
16 261 avoiding inappropriate exclusions (5/5) in contrast to 58% (15/26) of the non-allegiant studies.

17  
18  
19  
20 262

21  
22 263 On the index test domain, there were a number of differences between the two groups of studies. More of the non-allegiant studies (81%, 21/26)  
23 264 reported that the PHQ-9 was interpreted blind to the reference test compared to 60% (3/5) of the allegiant studies. All (5/5) allegiant studies were  
24 265 rated as pre-specifying the threshold on the PHQ-9 compared to 73% (19/26) of the non-allegiant studies. The two sets of studies were broadly  
25 266 comparable in terms of two items from the reference test domain (correctly classify target condition, reference test interpreted blind). Only one  
26 267 allegiant study used a translated version of the index test or reference test, so it is not possible to comment on differences between the two sets of  
27 268 studies in terms of these items from the index or reference test domains. For the flow and timing domain, the two groups of studies were broadly  
28 269 comparable for two of the criteria (interval of two weeks or less, all participants receive same reference test). However, fewer than half of the  
29 270 non-allegiant studies met the criterion for 'all participants included in the analysis' (42%, 11/26); whereas all allegiant studies met this criterion.

30  
31  
32  
33  
34  
35  
36  
37 271

38  
39 272 **Discussion**

1  
2  
3  
4  
5 273 This is to our knowledge the first systematic examination of a possible ‘allegiance’ or authorship effect in the validation of screening or case  
6  
7 274 finding psychological instrument for a common mental health disorder. We reviewed diagnostic validation studies of the PHQ-9, a widely used  
8  
9 275 depression screening-instrument. We found that allegiant studies reported higher sensitivity paired with similar specificity compared to non-  
10  
11 276 allegiant studies. When entered as a covariate in meta-regression analyses, allegiance status was predictive of variation in the DOR for both the  
12  
13 277 algorithm scoring method and the summed-item scoring method at a cut-off point of 10 or above.  
14  
15 278

16  
17 279 Previous research has proposed several possible explanations for the allegiance effect [9]–[11]. One possibility is the advertent bias that may  
18  
19 280 serve to inflate the performance of a test when evaluated by those who have developed it. However, before concluding that the differences are  
20  
21 281 due to this, it is important to explore and rule out alternative explanations. First, it is possible that any observed differences are a result of  
22  
23 282 differences in study characteristics of the two sets of studies (e.g., setting, clinical population). Secondly, differences in the methodological  
24  
25 283 quality of the studies may also account for any differences. These possibilities are examined below.  
26  
27 284

#### 28 285 Difference in study characteristics as potential alternative explanations

29  
30  
31 286 The two sets of studies were broadly comparable in terms of gender and the prevalence of depression, so these variables are unlikely to offer an  
32  
33 287 explanation for the differences. While there were some indications from both sets of comparisons that the PHQ-9 may have been researcher-  
34  
35 288 administered more often in the independent studies, it is not immediately clear how this would lead to lowered diagnostic performance.  
36  
37 289

1  
2  
3  
4  
5 290 The diagnostic meta-analyses of the PHQ-9 [13], [14] have shown that the sensitivity and DOR of the PHQ-9 tends to be lower in hospital  
6  
7 291 settings for both algorithm and summed-item scoring methods. Whilst the fact that proportionally more non-allegiant algorithm studies were  
8  
9 292 conducted in secondary care could explain the lower sensitivity and DOR values in the algorithm studies, in the studies that reported the cut-off  
10  
11 293 point of or above this would not be the case as proportionally more allegiant studies were conducted in hospital settings.

12  
13 294 Similarly, differences in the proportions of studies using translated versions of the PHQ-9 are also unlikely to offer an obvious explanation of the  
14  
15 295 difference in diagnostic performance, because in the algorithm set of studies more of the allegiant studies used a translated version of the test,  
16  
17 296 but the proportions were in the opposite direction for the studies using a cut off of 10 or above. We tested this by carrying out a sensitivity  
18  
19 297 analysis restricting the sample to English studies and studies with adequate translation. The allegiance effect was still predictive of DOR  
20  
21 298 variation between allegiance and non-allegiance studies variation in both algorithm ( $p = 0.00$ ) and summed item scoring at cut-off point of 10  
22  
23 299 meta-analyses ( $p = 0.02$ ).

24  
25 300 A similar conclusion is also likely to apply to the age of the samples. There were more older adults studies in the non-allegiant than allegiant  
26  
27 301 studies in the algorithm comparison. Depression could be more difficult to identify in older adults due to physical co-morbidities that may  
28  
29 302 present with similar symptomatology to depression and could account for the lower diagnostic performance in the non-allegiant studies.  
30  
31 303 However, the non-allegiant samples in the studies that reported the psychometric properties at cut-off point 10 or above had younger samples  
32  
33 304 than the allegiant studies, so this would not support this interpretation.

34  
35 306 The SCID was used as the gold standard in nearly all allegiant studies. The fact that some non-allegiant studies used other gold standards could  
36  
37 307 potentially explain the poorer psychometric properties of the PHQ-9 in these studies. The SCID is often regarded as the most valid of the  
38  
39 308 available semi-structured interviews used in depression diagnostic validity studies as the reference standard. If we assume that this is the case  
40  
41 309 and, furthermore, that the PHQ-9 is an accurate method of screening for depression, then the PHQ-9 may be more likely to agree with the SCID  
42  
43  
44  
45

1  
2  
3  
4  
5 310 than other reference standards. However, when we carried out a sensitivity analysis restricting the sample to SCID only studies the allegiance  
6  
7 311 effect was still predictive of DOR variation between allegiance and non-allegiance studies variation in both algorithm ( $p = 0.01$ ) and summed  
8  
9 312 item scoring at cut-off point of 10 reviews ( $p = 0.02$ ).

10 313

11 314

#### 12 13 14 15 16 315 Differences in methodological quality as potential alternative explanations

17  
18 316 The quality of the studies was evaluated using the QUADAS-2. Although there were several potential methodological differences between the  
19  
20 317 two groups of studies from the algorithm papers, not all of these offer obvious explanations of the observed differences and some are unlikely as  
21  
22 318 explanations. For example, more allegiant studies ensured that the reference test was interpreted blind to the index test. This is unlikely to  
23  
24 319 account for the observed differences, because a lack of blinding is typically associated with artificially increased diagnostic performance, which  
25  
26 320 is in the opposite direction to the pattern of results observed here. The impact of some other differences is less clear-cut. For example, a higher  
27  
28 321 number of the non-allegiant studies met the criterion for consecutive referrals. For this to provide an explanation of the of the observed  
29  
30 322 differences, the non-consecutive nature of the referrals in the studies by those who had developed the PHQ-9 would need to have led to the over-  
31  
32 323 inclusion of true positives or under-inclusion of false negatives given that these studies tended to report higher sensitivity relative to the non-  
33  
34 324 allegiant studies (and vice versa for the independent studies). It is not immediately obvious how this would occur. The allegiant studies were  
35  
36 325 more likely to have met the criterion of 'included all participants in the analysis'. It is possible that the greater loss of participants from the non-  
37  
38 326 allegiant studies may have artificially reduced the observed diagnostic accuracy, though, again, it is not immediately obvious how this would  
39  
40 327 have affected the true positive and false negative rates. Although there is not an obvious explanation of how these differences in methodological  
41  
42 328 quality could account for the observed differences in diagnostic performance, it is important to recognise that they cannot on that basis be ruled  
43  
44 329 out.



1  
2  
3  
4  
5 330

6  
7  
8 331 There are, however, two differences in methodological quality among the algorithm studies that are clearer potential alternative explanations.  
9 332 The higher rate of appropriate translations among the allegiant studies is potentially important, because lower diagnostic estimates may be  
10 333 expected from studies that have poorly translated versions of the index test. In the flow and timing domain, more allegiant studies ensured that  
11 334 there was a less than two-week interval between the index and reference test. This is consistent with lower diagnostic performance in the non-  
12 335 allegiant studies: as the interval increases it is likely that depression status may change and this would lead to lower levels of agreement between  
13 336 the index test and the reference test.

14  
15  
16  
17  
18 337

19  
20  
21 338 There were also differences on some quality assessment items between the two sets of studies in the summed item scoring method comparison.  
22 339 The threshold was reported as pre-specified in all allegiant studies in contrast to approximately three quarters of the non-allegiant studies. On the  
23 340 face of it, this is unlikely to explain the observed differences, because the use of a pre-specified cut-off point is likely to be associated with lower  
24 341 not higher diagnostic test performance. One possibility, however, is that studies that performed poorly at this cut-off point were less likely to be  
25 342 reported by those who had developed the measure. As discussed in more detail in the limitations section, we were unable to explore this  
26 343 possibility through the use of formal tests for publication bias.

27  
28  
29  
30  
31  
32 344

33  
34 345 All allegiant studies avoided inappropriate exclusions compared to approximately half of the non-allegiant studies. While this is a potential  
35 346 alternative explanation of the differences it is not immediately obvious how this would explain the differences in diagnostic performance  
36 347 between the two sets of studies. Fewer than half of the non-allegiant studies met the criterion for 'all participants included in the analysis', in  
37 348 contrast to all of the allegiant studies met this criterion, but again this difference should usually work against the inclusive studies, not those

1  
2  
3  
4  
5 349 excluding cases. More of the non-allegiant studies reported that the PHQ-9 was interpreted blind to the reference test. This does offer a potential  
6  
7 350 explanation, because the absence of blinding may artificially inflate diagnostic accuracy.  
8

9 351

10  
11 352 **Limitations**

12  
13  
14 353 The results of this review need to be viewed in the light of the limitations of the primary studies that contributed to the review and the review  
15  
16 354 itself. An important consideration is to establish whether any observed differences between the diagnostic performance of the non-allegiant and  
17  
18 355 allegiant studies are better accounted for by study characteristic or methodological differences. Caution, however, is needed in interpreting any  
19  
20 356 differences, because of the small number of allegiant studies in both the algorithm and cut-off 10 or above comparisons. The small number of  
21  
22 357 allegiant studies also meant that we were also unable to explore the potential role of publication bias in the non-allegiant and allegiant studies. At  
23  
24 358 least 10 studies are required to use standard methods of examining publication bias, but the number of allegiant studies in both the algorithm and  
25  
26 359 cut-off 10 or above comparisons were fewer than this.  
27

28  
29 360

30 361

31  
32 362 **Conclusions and implications for further research.**

33  
34 363 The aims of the review was to investigate whether an allegiance effect is found that leads to an increased diagnostic performance in diagnostic  
35  
36 364 validation studies that were conducted by teams connected to the original developers of the PHQ-9. Our analyses showed that diagnostic studies  
37  
38 365 conducted by independent/non-allegiant researchers had lower sensitivity paired with similar specificity compared to studies that were classified  
39  
40 366 as allegiant. This conclusion held for both the algorithm and cut-off 10 or above studies. We explored a range of possible alternative  
41  
42  
43  
44  
45

1  
2  
3  
4  
5 367 explanations for the observed allegiance effect including both differences in study characteristics and study quality. A number of potential  
6  
7 368 differences were found, though for some of these it is not clear how they would necessarily account for the observed differences. However, there  
8  
9 369 were a number of differences that offered potential alternative explanations unconnected to allegiance effects. In the algorithm studies, the  
10 370 studies rated as allegiant were also more likely to use an appropriate translation of the PHQ-9 and were also more likely to ensure that the index  
11 371 and reference test were conducted within two weeks of each other, both of which may be associated with an improvement in observed diagnostic  
12 372 performance of an instrument. The majority of studies in both meta-analyses did not provide clear statements about potential conflict of interest  
13 373 and/or funding, however the newer studies were more likely to provide such statements, which may reflect increasing transparency in this area of  
14 374 research.

18  
19 375

20  
21 376 We cannot, therefore, conclude that allegiance effects are present in studies examining the diagnostic performance of the PHQ-9; but nor can we  
22 377 rule them out. Conflicts of interest are an important area of investigation in medical and behavioural research, particularly due to concerns about  
23 378 trial results being influenced by industry sponsorship. Future diagnostic validity in this area should as a matter of routine present clear statements  
24 379 about potential conflicts of interest and funding, particularly relating to the development of the instrument under evaluation. Future meta-  
25 380 analyses of diagnostic validation studies of psychological measures should routinely evaluate the impact of researcher allegiance in the primary  
26 381 studies examined in the meta-analysis.

27 382

28 383

29 384 **Contributors** LM led on all stages of the review and is the guarantor. We used an established database of diagnostic validation studies of the  
30 385 PHQ-9 [13], [14] SG provided expert advice on methodology and approaches to assessment of the evidence base. AM carried out the literature

1  
2  
3  
4  
5 386 searches, screened the studies, extracted data and assessed the quality of the included studies for one of the systematic reviews (Moriarty et al.,  
6  
7 387 2015) . LM carried out the literature searches, screened the studies, extracted data and assessed the quality of the included studies for the other  
8  
9 388 systematic review (Manea et al., 2015), analysed the data for both systematic reviews and drafted the report. JB was involved in the development  
10 389 of the study, wrote the introduction section of the review and contributed to the production of the final report. DM supervised the quality  
11  
12 390 assessment, methodology and approaches to evidence synthesis, provided senior advice and support throughout and contributed to the  
13  
14 391 production of the final report. All parties were involved in drafting and/or commenting on the report.  
15

16 392

17  
18 393 **Competing interests** None declared.  
19

20  
21 394

22  
23 395 **Provenance and peer review** Not commissioned; externally peer reviewed.  
24

25  
26 396

27  
28 397 **Data sharing statement** No additional data are available.  
29

30  
31 398

32  
33 399 REFERENCES  
34

- 35  
36 400 1. [1] L. Luborsky, L. Diguier, D. A. Seligman, R. Rosenthal, E. D. Krause, S. Johnson, G. Halperin, M. Bishop, J. S. Berman, and E.  
37 401 Schweizer, "The Researcher's Own Therapy Allegiances: A 'Wild Card' in Comparisons of Treatment Efficacy," *Clin. Psychol. Sci.*  
38 402 *Pract.*, vol. 6, no. 1, pp. 95–106, May 2006.  
39  
40  
41  
42  
43  
44  
45

- 1  
2  
3  
4  
5 403 [2] E. Dragioti, I. Dimoliatis, and E. Evangelou, "Disclosure of researcher allegiance in meta-analyses and randomised controlled trials of  
6  
7 404 psychotherapy: a systematic appraisal," *BMJ Open*, vol. 5, no. 6, pp. e007206–e007206, Jun. 2015.
- 8  
9 405 [3] T. Munder, O. Brüttsch, R. Leonhart, H. Gerger, and J. Barth, "Researcher allegiance in psychotherapy outcome research: An overview of  
10  
11 406 reviews," *Clin. Psychol. Rev.*, vol. 33, no. 4, pp. 501–511, Jun. 2013.
- 12  
13 407 [4] D. A. Winter, "Editorial." Routledge, 07-May-2010.
- 14  
15  
16 408 [5] J. McLeod, "Taking allegiance seriously—implications for research policy and practice," *Eur. J. Psychother. Couns.*, May 2010.
- 17  
18 409 [6] G. L. Staines and C. M. Cleland, "Bias in meta-analytic estimates of the absolute efficacy of psychotherapy.," *Rev. Gen. Psychol.*, vol. 11,  
19  
20 410 no. 4, pp. 329–347, 2007.
- 21  
22 411 [7] K. D. Markman and E. R. Hirt, "Social Prediction and the 'Allegiance Bias,'" *Soc. Cogn.*, vol. 20, no. 1, pp. 58–86, Feb. 2002.
- 23  
24  
25 412 [8] G. D. Walters, "The Psychological Inventory of Criminal Thinking Styles and Psychopathy Checklist: Screening version as incrementally  
26  
27 413 valid predictors of recidivism.," *Law Hum. Behav.*, vol. 33, no. 6, pp. 497–505, 2009.
- 28  
29 414 [9] J. P. Singh, M. Grann, and S. Fazel, "Authorship Bias in Violence Risk Assessment? A Systematic Review and Meta-Analysis," *PLoS*  
30  
31 415 *One*, vol. 8, no. 9, p. e72484, Sep. 2013.
- 32  
33 416 [10] P. R. Blair, D. K. Marcus, and M. T. Boccaccini, "Is There an Allegiance Effect for Assessment Instruments? Actuarial Risk Assessment  
34  
35 417 as an Exemplar," *Clin. Psychol. Sci. Pract.*, vol. 15, no. 4, pp. 346–360, Oct. 2008.
- 36  
37 418 [11] S. O. Lilienfeld and M. K. Jones, "Allegiance Effects in Assessment: Unresolved Questions, Potential Explanations, and Constructive  
38  
39 419 Remedies," *Clin. Psychol. Sci. Pract.*, vol. 15, no. 4, pp. 361–365, Oct. 2008.
- 40  
41  
42  
43  
44  
45  
46  
47  
48  
49

- 1  
2  
3  
4  
5 420 [12] K. Kroenke, R. L. Spitzer, and J. B. Williams, "The PHQ-9: validity of a brief depression severity measure.," *J. Gen. Intern. Med.*, vol.  
6 421 16, no. 9, pp. 606–13, Sep. 2001.
- 8  
9 422 [13] L. Manea, S. Gilbody, and D. McMillan, "A diagnostic meta-analysis of the Patient Health Questionnaire-9 (PHQ-9) algorithm scoring  
10 423 method as a screen for depression," *Gen. Hosp. Psychiatry*, vol. 37, no. 1, pp. 67–75, Jan. 2015.
- 13 424 [14] A. S. Moriarty, S. Gilbody, D. McMillan, and L. Manea, "Screening and case finding for major depressive disorder using the Patient  
14 425 Health Questionnaire (PHQ-9): a meta-analysis," *Gen. Hosp. Psychiatry*, vol. 37, no. 6, pp. 567–576, Nov. 2015.
- 17 426 [15] P. F. Whiting, A. W. S. Rutjes, M. E. Westwood, S. Mallett, J. J. Deeks, J. B. Reitsma, M. M. G. Leeflang, J. A. C. Sterne, P. M. M.  
18 427 Bossuyt, and QUADAS-2 Group, "QUADAS-2: a revised tool for the quality assessment of diagnostic accuracy studies.," *Ann. Intern.  
20 428 Med.*, vol. 155, no. 8, pp. 529–36, Oct. 2011.
- 23 429 [16] R. Mann, C. E. Hewitt, and S. M. Gilbody, "Assessing the quality of diagnostic studies using psychometric instruments: applying  
24 430 QUADAS," *Soc. Psychiatry Psychiatr. Epidemiol.*, vol. 44, no. 4, pp. 300–307, Apr. 2009.
- 27 431 [17] J. B. Reitsma, A. S. Glas, A. W. S. Rutjes, R. J. P. M. Scholten, P. M. Bossuyt, and A. H. Zwinderman, "Bivariate analysis of sensitivity  
28 432 and specificity produces informative summary measures in diagnostic reviews," *J. Clin. Epidemiol.*, vol. 58, no. 10, pp. 982–990, Oct.  
30 433 2005.
- 33 434 [18] University of York. NHS Centre for Reviews and Dissemination., *Systematic reviews : CRD's guidance for undertaking reviews in health  
34 435 care*. CRD, University of York, 2009.
- 37 436 [19] S. D. Walter, "Properties of the summary receiver operating characteristic (SROC) curve for diagnostic test data," *Stat. Med.*, vol. 21, no.  
38 437 9, pp. 1237–1256, May 2002.

- 1  
2  
3  
4  
5 438 [20] J. G. Lijmer, P. M. M. Bossuyt, and S. H. Heisterkamp, “Exploring sources of heterogeneity in systematic reviews of diagnostic tests,”  
6  
7 439 *Stat. Med.*, vol. 21, no. 11, pp. 1525–1537, Jun. 2002.
- 8  
9 440 [21] S. G. Thompson and J. P. T. Higgins, “How should meta-regression analyses be undertaken and interpreted?,” *Stat. Med.*, vol. 21, no. 11,  
10  
11 441 pp. 1559–1573, Jun. 2002.
- 12  
13 442 [22] C. Diez-Quevedo, T. Rangil, L. Sanchez-Planell, K. Kroenke, and R. L. Spitzer, “Validation and utility of the patient health questionnaire  
14  
15 443 in diagnosing mental disorders in 1003 general hospital Spanish inpatients,” *Psychosom. Med.*, vol. 63, no. 4, pp. 679–86.
- 16  
17  
18 444 [23] K. Gräfe, S. Zipfel, W. Herzog, and B. Löwe, “Screening psychischer Störungen mit dem “Gesundheitsfragebogen für Patienten (PHQ-  
19  
20 445 D)“,” *Diagnostica*, vol. 50, no. 4, pp. 171–181, Oct. 2004.
- 21  
22 446 [24] B. Löwe, R. L. Spitzer, K. Gräfe, K. Kroenke, A. Quenter, S. Zipfel, C. Buchholz, S. Witte, and W. Herzog, “Comparative validity of  
23  
24 447 three screening questionnaires for DSM-IV depressive disorders and physicians’ diagnoses,” *J. Affect. Disord.*, vol. 78, no. 2, pp. 131–40,  
25  
26 448 Feb. 2004.
- 27  
28 449 [25] R. L. Spitzer, K. Kroenke, and J. B. Williams, “Validation and utility of a self-report version of PRIME-MD: the PHQ primary care study.  
29  
30 450 Primary Care Evaluation of Mental Disorders. Patient Health Questionnaire,” *JAMA*, vol. 282, no. 18, pp. 1737–44, Nov. 1999.
- 31  
32 451 [26] P. Thekkumpurath, J. Walker, I. Butcher, L. Hodges, A. Kleiboer, M. O’Connor, L. Wall, G. Murray, K. Kroenke, and M. Sharpe,  
33  
34 452 “Screening for major depression in cancer outpatients: the diagnostic accuracy of the 9-item patient health questionnaire,” *Cancer*, vol.  
35  
36 453 117, no. 1, pp. 218–27, Jan. 2011.
- 37  
38 454 [27] K. Muramatsu, H. Miyaoka, K. Kamijima, Y. Muramatsu, M. Yoshida, T. Otsubo, and F. Gejyo, “The patient health questionnaire,  
39  
40 455 Japanese version: validity according to the mini-international neuropsychiatric interview-plus,” *Psychol. Rep.*, vol. 101, no. 3 Pt 1, pp.

- 1  
2  
3  
4  
5 456 952–60, Dec. 2007.  
6  
7  
8 457 [28] R. Navinés, P. Castellví, J. Moreno-España, D. Gimenez, M. Udina, S. Cañizares, C. Diez-Quevedo, M. Valdés, R. Solà, and R. Martín-  
9 458 Santos, “Depressive and anxiety disorders in chronic hepatitis C patients: Reliability and validity of the Patient Health Questionnaire,” *J.*  
10 459 *Affect. Disord.*, vol. 138, no. 3, pp. 343–351, May 2012.  
11  
12  
13 460 [29] S. M. Eack, C. G. Greeno, and B.-J. Lee, “Limitations of the Patient Health Questionnaire in Identifying Anxiety and Depression: Many  
14 461 Cases Are Undetected.,” *Res. Soc. Work Pract.*, vol. 16, no. 6, pp. 625–631, Nov. 2006.  
15  
16  
17 462 [30] J. R. Fann, C. H. Bombardier, S. Dikmen, P. Esselman, C. A. Warm, E. Pelzer, H. Rau, and N. Temkin, “Validity of the Patient Health  
18 463 Questionnaire-9 in assessing depression following traumatic brain injury.,” *J. Head Trauma Rehabil.*, vol. 20, no. 6, pp. 501–11.  
19  
20  
21 464 [31] B. Gelaye, M. A. Williams, S. Lemma, N. Deyessa, Y. Bahretibeb, T. Shibre, D. Wondimagegn, A. Lemenhe, J. R. Fann, A. Vander  
22 465 Stoep, and X.-H. H. Andrew Zhou, “Validity of the patient health questionnaire-9 for depression screening and diagnosis in East Africa,”  
23 466 *Psychiatry Res.*, vol. 210, no. 2, pp. 653–661, Dec. 2013.  
24  
25  
26  
27 467 [32] T. Hyphantis, K. Kotsis, P. V. Voulgari, N. Tsifetaki, F. Creed, and A. A. Drosos, “Diagnostic accuracy, internal consistency, and  
28 468 convergent validity of the Greek version of the patient health questionnaire 9 in diagnosing depression in rheumatologic disorders,”  
29 469 *Arthritis Care Res. (Hoboken)*, vol. 63, no. 9, pp. 1313–1321, Sep. 2011.  
30  
31  
32  
33 470 [33] M. Inagaki, T. Ohtsuki, N. Yonemoto, Y. Kawashima, A. Saitoh, Y. Oikawa, M. Kurosawa, K. Muramatsu, T. A. Furukawa, and M.  
34 471 Yamada, “Validity of the Patient Health Questionnaire (PHQ)-9 and PHQ-2 in general internal medicine primary care at a Japanese rural  
35 472 hospital: a cross-sectional study.,” *Gen. Hosp. Psychiatry*, vol. 35, no. 6, pp. 592–7, Jan. 2013.  
36  
37  
38  
39 473 [34] M. E. Khamseh, H. R. Baradaran, A. Javanbakht, M. Mirghorbani, Z. Yadollahi, and M. Malek, “Comparison of the CES-D and PHQ-9  
40  
41  
42  
43  
44  
45  
46  
47  
48  
49



- 1  
2  
3  
4  
5 474 depression scales in people with type 2 diabetes in Tehran, Iran,” *BMC Psychiatry*, vol. 11, no. 1, p. 61, Dec. 2011.
- 6  
7  
8 475 [35] P. Persoons, K. Luyckx, C. Desloovere, J. Vandenberghe, and B. Fischler, “Anxiety and mood disorders in otorhinolaryngology  
9 476 outpatients presenting with dizziness: validation of the self-administered PRIME-MD Patient Health Questionnaire and epidemiology.,”  
10 477 *Gen. Hosp. Psychiatry*, vol. 25, no. 5, pp. 316–23.
- 11  
12  
13 478 [36] A. Picardi, D. A. Adler, D. Abeni, H. Chang, P. Pasquini, W. H. Rogers, and K. M. Bungay, “Screening for depressive disorders in  
14 479 patients with skin diseases: a comparison of three screeners.,” *Acta Derm. Venereol.*, vol. 85, no. 5, pp. 414–9, 2005.
- 15  
16  
17 480 [37] L. Stafford, M. Berk, and H. J. Jackson, “Validity of the Hospital Anxiety and Depression Scale and Patient Health Questionnaire-9 to  
18 481 screen for depression in patients with coronary artery disease,” *Gen. Hosp. Psychiatry*, vol. 29, no. 5, pp. 417–424, Sep. 2007.
- 19  
20  
21 482 [38] B. D. Thombs, R. C. Ziegelstein, and M. A. Whooley, “Optimizing detection of major depression among patients with coronary artery  
22 483 disease using the patient health questionnaire: data from the heart and soul study.,” *J. Gen. Intern. Med.*, vol. 23, no. 12, pp. 2014–7, Dec.  
23 484 2008.
- 24  
25  
26  
27 485 [39] A. W. Thompson, H. Liu, R. D. Hays, W. J. Katon, R. Rausch, N. Diaz, E. L. Jacob, S. D. Vassar, and B. G. Vickrey, “Diagnostic  
28 486 accuracy and agreement across three depression assessment measures for Parkinson’s disease,” *Parkinsonism Relat. Disord.*, vol. 17, no.  
29 487 1, pp. 40–45, Jan. 2011.
- 30  
31  
32  
33 488 [40] A. Turner, J. Hambridge, J. White, G. Carter, K. Clover, L. Nelson, and M. Hackett, “Depression screening in stroke: a comparison of  
34 489 alternative measures with the structured diagnostic interview for the diagnostic and statistical manual of mental disorders, fourth edition  
35 490 (major depressive episode) as criterion standard.,” *Stroke.*, vol. 43, no. 4, pp. 1000–5, Apr. 2012.
- 36  
37  
38  
39 491 [41] K. M. van Steenbergen-Weijnenburg, L. de Vroege, R. R. Ploeger, J. W. Brals, M. G. Vloedveld, T. F. Veneman, L. Hakkaart-van Roijen,  
40  
41  
42  
43  
44  
45

- 1  
2  
3  
4  
5 492 F. F. Rutten, A. T. Beekman, and C. M. van der Feltz-Cornelis, "Validation of the PHQ-9 as a screening instrument for depression in  
6 diabetes patients in specialized outpatient clinics," *BMC Health Serv. Res.*, vol. 10, no. 1, p. 235, Dec. 2010.  
7 493
- 8  
9 494 [42] B. Arroll, F. Goodyear-Smith, S. Crengle, J. Gunn, N. Kerse, T. Fishman, K. Falloon, and S. Hatcher, "Validation of PHQ-2 and PHQ-9  
10 to Screen for Major Depression in the Primary Care Population," *Ann. Fam. Med.*, vol. 8, no. 4, pp. 348–353, Jul. 2010.  
11 495
- 12  
13 496 [43] L. Ayalon, M. Goldfracht, and P. Bech, "'Do you think you suffer from depression?': Reevaluating the use of a single item question for  
14 the screening of depression in older primary care patients," *Int. J. Geriatr. Psychiatry*, vol. 25, no. 5, pp. 497–502, May 2010.  
15 497
- 16  
17 498 [44] V. Henkel, R. Mergl, R. Kohnen, A.-K. Allgaier, H.-J. Möller, and U. Hegerl, "Use of brief depression screening tools in primary care:  
18 consideration of heterogeneity in performance in different patient groups," *Gen. Hosp. Psychiatry*, vol. 26, no. 3, pp. 190–198, May 2004.  
19 499
- 20  
21 500 [45] F. Lamers, C. C. M. Jonkers, H. Bosma, B. W. J. H. Penninx, J. A. Knottnerus, and J. T. M. van Eijk, "Summed score of the Patient  
22 Health Questionnaire-9 was a reliable and valid method for depression screening in chronically ill elderly patients," *J. Clin. Epidemiol.*,  
23 501  
24 vol. 61, no. 7, pp. 679–687, Jul. 2008.  
25 502
- 26  
27 503 [46] M. Lotrakul, S. Sumrithe, and R. Saipanish, "Reliability and validity of the Thai version of the PHQ-9," *BMC Psychiatry*, vol. 8, no. 1, p.  
28 46, Dec. 2008.  
29 504
- 30  
31 505 [47] N. P. Zuithoff, Y. Vergouwe, M. King, I. Nazareth, M. J. van Wezep, K. G. Moons, and M. I. Geerlings, "The Patient Health  
32 Questionnaire-9 for detection of major depressive disorder in primary care: consequences of current thresholds in a cross-sectional study,"  
33 506  
34 *BMC Fam. Pract.*, vol. 11, no. 1, p. 98, Dec. 2010.  
35 507
- 36  
37 508 [48] D. Gjerdingen, S. Crow, P. McGovern, M. Miner, and B. Center, "Postpartum depression screening at well-child visits: validity of a 2-  
38 question screen and the PHQ-9," *Ann. Fam. Med.*, vol. 7, no. 1, pp. 63–70, 2009.  
39 509  
40  
41  
42  
43  
44  
45

- 1  
2  
3  
4  
5 510 [49] V. Henkel, R. Mergl, R. Kohnen, A.-K. Allgaier, H.-J. Möller, and U. Hegerl, “Use of brief depression screening tools in primary care:  
6 consideration of heterogeneity in performance in different patient groups.,” *Gen. Hosp. Psychiatry*, vol. 26, no. 3, pp. 190–8.  
7 511
- 8  
9 512 [50] L. S. Williams, E. J. Brizendine, L. Plue, T. Bakas, W. Tu, H. Hendrie, and K. Kroenke, “Performance of the PHQ-9 as a screening tool  
10 for depression after stroke.,” *Stroke.*, vol. 36, no. 3, pp. 635–8, Mar. 2005.  
11 513
- 12  
13 514 [51] M. H. N. Chagas, V. Tumas, G. R. Rodrigues, J. P. Machado-de-Sousa, A. S. Filho, J. E. C. Hallak, and J. A. S. Crippa, “Validation and  
14 internal consistency of Patient Health Questionnaire-9 for major depression in Parkinson’s disease,” *Age Ageing*, vol. 42, no. 5, pp. 645–  
15 515 649, Sep. 2013.  
16 516
- 17  
18  
19 517 [52] L. Elderon, K. G. Smolderen, B. Na, and M. A. Whooley, “Accuracy and prognostic value of American Heart Association: recommended  
20 depression screening in patients with coronary heart disease: data from the Heart and Soul Study.,” *Circ. Cardiovasc. Qual. Outcomes*,  
21 518 vol. 4, no. 5, pp. 533–40, Sep. 2011.  
22 519
- 23  
24  
25 520 [53] A. G. Rooney, S. McNamara, M. Mackinnon, M. Fraser, R. Rampling, A. Carson, and R. Grant, “Screening for major depressive disorder  
26 in adults with cerebral glioma: an initial validation of 3 self-report instruments,” *Neuro. Oncol.*, vol. 15, no. 1, pp. 122–129, Jan. 2013.  
27 521
- 28  
29 522 [54] S. Watnick, P.-L. Wang, T. Demadura, and L. Ganzini, “Validation of 2 depression screening tools in dialysis patients.,” *Am. J. Kidney*  
30 523 *Dis.*, vol. 46, no. 5, pp. 919–24, Nov. 2005.  
31 524
- 32  
33 524 [55] Y. Zhang, R. Ting, M. Lam, J. Lam, H. Nan, R. Yeung, W. Yang, L. Ji, J. Weng, Y.-K. Wing, N. Sartorius, and J. C. N. Chan,  
34 “Measuring depressive symptoms using the Patient Health Questionnaire-9 in Hong Kong Chinese subjects with type 2 diabetes,” *J.*  
35 525 *Affect. Disord.*, vol. 151, no. 2, pp. 660–666, Nov. 2013.  
36 526
- 37  
38  
39 527 [56] A. O. Adewuya, B. A. Ola, and O. O. Afolabi, “Validity of the patient health questionnaire (PHQ-9) as a screening tool for depression  
40  
41  
42  
43  
44  
45

- 1  
2  
3  
4  
5 528 amongst Nigerian university students,” *J. Affect. Disord.*, vol. 96, no. 1–2, pp. 89–93, Nov. 2006.  
6  
7  
8 529 [57] T. H. Fine, A. A. Contractor, M. Tamburrino, J. D. Elhai, M. R. Prescott, G. H. Cohen, E. Shirley, P. K. Chan, T. Goto, R. Slembariski, I.  
9 530 Liberzon, S. Galea, and J. R. Calabrese, “Validation of the telephone-administered PHQ-9 against the in-person administered SCID-I  
10 531 major depression module,” *J. Affect. Disord.*, vol. 150, no. 3, pp. 1001–1007, Sep. 2013.  
11  
12  
13 532 [58] S. Gilbody, D. Richards, S. Brealey, and C. Hewitt, “Screening for depression in medical settings with the Patient Health Questionnaire  
14 533 (PHQ): A diagnostic meta-analysis,” *J. Gen. Intern. Med.*, vol. 22, no. 11, pp. 1596–1602, Oct. 2007.  
15  
16  
17 534 [59] E. Phelan, B. Williams, K. Meeker, K. Bonn, J. Frederick, J. LoGerfo, and M. Snowden, “A study of the diagnostic accuracy of the PHQ-  
18 535 9 in primary care elderly,” *BMC Fam. Pract.*, vol. 11, no. 1, p. 63, Dec. 2010.  
19  
20  
21 536 [60] A. C. Sidebottom, P. A. Harrison, A. Godecker, and H. Kim, “Validation of the Patient Health Questionnaire (PHQ)-9 for prenatal  
22 537 depression screening,” *Arch. Womens. Ment. Health*, vol. 15, no. 5, pp. 367–374, Oct. 2012.  
23  
24  
25 538 [61] F. de Lima Osório, A. Vilela Mendes, J. A. Crippa, and S. R. Loureiro, “Study of the Discriminative Validity of the PHQ-9 and PHQ-2 in  
26 539 a Sample of Brazilian Women in the Context of Primary Health Care,” *Perspect. Psychiatr. Care*, vol. 45, no. 3, pp. 216–227, Jul. 2009.  
27  
28  
29 540 [62] V. Patel, R. Araya, N. Chowdhary, M. King, B. Kirkwood, S. Nayak, G. Simon, and H. A. Weiss, “Detecting common mental disorders in  
30 541 primary care in India: a comparison of five screening questionnaires,” *Psychol. Med.*, vol. 38, no. 2, Feb. 2008.  
31  
32  
33 542 [63] M. N. N. Azah, M. E. M. Shah, S. Juwita, I. S. Bahri, W. M. W. M. Rushidi, and Y. M. Jamil, “Validation of the Malay Version Brief  
34 543 Patient Health Questionnaire (PHQ-9) among Adult Attending Family Medicine Clinics,” *Int. Med. J.*, 2005.  
35  
36  
37 544 [64] S.-I. Liu, Z.-T. Yeh, H.-C. Huang, F.-J. Sun, J.-J. Tjung, L.-C. Hwang, Y.-H. Shih, and A. W.-C. Yeh, “Validation of Patient Health  
38 545 Questionnaire for depression screening among primary care patients in Taiwan,” *Compr. Psychiatry*, vol. 52, no. 1, pp. 96–101, Jan. 2011.  
39  
40  
41  
42  
43  
44  
45  
46  
47  
48  
49

- 1  
2  
3  
4  
5 546 [65] K. Wittkamp, H. van Ravesteijn, K. Baas, H. van de Hoogen, A. Schene, P. Bindels, P. Lucassen, E. van de Lisdonk, and H. van Weert,  
6 547 “The accuracy of Patient Health Questionnaire-9 in detecting depression and measuring depression severity in high-risk groups in primary  
7 548 care,” *Gen. Hosp. Psychiatry*, vol. 31, no. 5, pp. 451–459, Sep. 2009.  
8  
9  
10  
11 549  
12  
13 550  
14  
15  
16 551  
17  
18 552  
19  
20  
21 553  
22  
23 554  
24  
25  
26 555  
27  
28 556  
29  
30  
31 557  
32  
33 558  
34  
35  
36 559  
37  
38 560  
39  
40  
41  
42  
43  
44  
45  
46  
47  
48  
49

For peer review only

1  
2  
3  
4  
5  
6  
7  
8  
9  
10  
11  
12  
13  
14  
15  
16  
17  
18  
19  
20  
21  
22  
23  
24  
25  
26  
27  
28  
29  
30  
31  
32  
33  
34  
35  
36  
37  
38  
39  
40  
41  
42  
43  
44  
45  
46  
47  
48  
49

| <b>Table 1: Descriptive characteristics of algorithm studies (Manea et al., 2014)</b> |                                                                                                                                                 |                                                                            |                                                        |                            |                                                                                                                          |
|---------------------------------------------------------------------------------------|-------------------------------------------------------------------------------------------------------------------------------------------------|----------------------------------------------------------------------------|--------------------------------------------------------|----------------------------|--------------------------------------------------------------------------------------------------------------------------|
| <b>Study</b>                                                                          | <b>Sample characteristics</b>                                                                                                                   | <b>Sample size and % depressed</b>                                         | <b>PHQ-9 characteristics</b>                           | <b>Diagnostic standard</b> | <b>a) Conflict of interest (COI) declaration</b><br><b>b) Funding</b><br><b>c) Relationship with original developers</b> |
|                                                                                       | <b>(Country, setting, age, sex)</b>                                                                                                             |                                                                            |                                                        |                            |                                                                                                                          |
| Diez-Quevedo et al. (2001)                                                            | Country: Spain<br><br>Setting: Medical and surgical tertiary hospitals<br><br>Age (yrs): M=43 (SD=14.2)<br><br>Female: 45.6%                    | N = 1003<br>Depressed: 8.2%                                                | Administration:<br>Self-report<br>Language:<br>Spanish | DSM-III-R SCID             | a) No COI declaration<br>b) Funding acknowledged (academic institutions)<br>c) Not acknowledged                          |
| Gräfe et al. (2004)                                                                   | Country: Germany<br><br>Setting: psychosomatic walk-in clinics and family practices<br><br>Age (yrs): M = 41.9 (SD = 13.8)<br><br>Female: 67.8% | N = 528<br>Depressed: 29.2% psychosomatic patients; 6.16% medical patients | Language: German<br><br>Administration: self-report    | DSM-IV SCID                | a) No COI declaration<br>b) Acknowledged funding from Pfizer<br>c) Not acknowledged                                      |

|                         |                                                                                                                                         |                                 |                                                       |                |                                                                                                                                                                                                                                                                                        |
|-------------------------|-----------------------------------------------------------------------------------------------------------------------------------------|---------------------------------|-------------------------------------------------------|----------------|----------------------------------------------------------------------------------------------------------------------------------------------------------------------------------------------------------------------------------------------------------------------------------------|
| Lowe et al. (2004)      | Country: Germany<br><br>Setting: Outpatient clinics and family practices<br>Age (yrs): M = 41.7 (SD = 13.8)<br>Female: 67.1%            | N = 501<br><br>Depressed: 13.2% | Administration: Self-report<br>Language: German       | DSM-IV<br>SCID | a) COI declaration 'This study was supported by unrestricted restricted grants from Pfizer Germany and from the medical faculty of the University of Heidelberg Germany, and there are no COI.'<br>b) Acknowledged funding from Pfizer and academic institution<br>c) Not acknowledged |
| Muramatsu et al. (2007) | Country: Japan<br><br>Setting: Primary care and general hospital<br><br>Age (yrs): M = 43.3 (SD = 16.4)<br><br>Female: 59.5%            | N = 131<br><br>Depressed: 28.2% | Administration: Self-report<br><br>Language: Japanese | DSM-IV<br>MINI | a) No COI declaration<br>b) Acknowledged funding from Pfizer<br>c) Acknowledged one of the developers of the PHQ-9: 'The authors acknowledge Dr R L Spitzer'                                                                                                                           |
| Navinés et al. (2012)   | Country: Spain<br><br>Setting: General hospital (patients with chronic HCV)<br><br>Age (yrs): M = 43.4 (SD = 10.2)<br><br>Female: 28.6% | N = 500<br>Depressed: 6.4%      | Administration: Self-report<br><br>Language: Spanish  | DSM-IV<br>SCID | a) All authors declared that they had no COI.<br>b) Role of funding source declared<br>c) Not acknowledged                                                                                                                                                                             |

|                             |                                                                                                    |                                                      |                                                                 |                |                                                                                                                                                                                                                                                                                                                                                                                                                                                                                                                                                                                                                         |
|-----------------------------|----------------------------------------------------------------------------------------------------|------------------------------------------------------|-----------------------------------------------------------------|----------------|-------------------------------------------------------------------------------------------------------------------------------------------------------------------------------------------------------------------------------------------------------------------------------------------------------------------------------------------------------------------------------------------------------------------------------------------------------------------------------------------------------------------------------------------------------------------------------------------------------------------------|
| Spitzer et al. (1999)       | Country: US<br><br>Setting: Primary care<br><br>Age (yrs): M = 46 (SD = 17.2)<br><br>Female: 66%   | N = 3000 (585 received SCID)<br><br>Depressed: 10%   | Administration: Self-report<br><br>Language: English            | DSM-III-R SCID | a) No COI declaration<br>b) Acknowledged funding from Pfizer. 'Drs Spitzer and Williams receive honoraria and consulting money from Pfizer Inc, which has supported this work.'<br>c) N/A                                                                                                                                                                                                                                                                                                                                                                                                                               |
| Thekkumpurath et al. (2010) | Country: UK<br><br>Setting: Hospital (cancer patients)<br><br>Age (yrs): M = 61<br><br>Female: 63% | N = 782<br><br>Depressed: 6.3% (of the whole sample) | Administration: Not stated<br><br>Language: English             | DSM-IV SCID    | a) COI declaration: 'Supported by Cancer Research UK'<br>b) As in a)<br>c) Not acknowledged                                                                                                                                                                                                                                                                                                                                                                                                                                                                                                                             |
| Ayalon et al. (2010)        | Country: Israel<br><br>Age (yrs): M = 75 (SD = 8.1)<br><br>Female: 40.5 %                          | N = 153<br>Depressed: 3.9 %                          | Administration: Researcher administered<br><br>Language: Hebrew | DSM-IV SCID    | a) COI declaration: 'The project was funded by an Investigator's Initiated Research Grant from Lundbeck International given to Dr Liat Ayalon. Lundbeck International had no other involvement in the project concept of design or in this paper. Per Bech has occasionally over the past 3 years until August 2008 received funding from and has been speaker or member of advisory boards for pharmaceutical companies with an interest in the drug treatment of affective disorders (Astra-Zeneca, Lilly, H. Lundbeck A/S, Lundbeck Foundation and Organon).'<br>b) Acknowledged funding from Lundbeck International |



|                    |                                                                                                                                              |                                 |                                                                 |             |                                                                                           |
|--------------------|----------------------------------------------------------------------------------------------------------------------------------------------|---------------------------------|-----------------------------------------------------------------|-------------|-------------------------------------------------------------------------------------------|
| Eack et al. (2006) | Country: US<br><br>Setting: Community mental health centers for children<br><br>Age (yrs): M = 39.20 (SD 9.63)<br><br>Female: 100%           | N = 50<br><br>Depressed: 28%    | Administration: Self-report<br><br>Language: English            | DSM-IV SCID | a) No COI declaration<br>b) Funding acknowledged (academic /health research institutions) |
| Fann et al. (2005) | Country: US<br><br>Setting: Trauma hospital (inpatients with traumatic brain injury)<br><br>Age (yrs): M = 42 (SD=17.9)<br><br>Female: 29.1% | N = 135<br><br>Depressed: 16.3% | Administration: Telephone-administered<br><br>Language: English | DSM-IV SCID | a) No COI declaration<br>b) Funding acknowledged (academic institutions)                  |

1  
2  
3  
4  
5  
6  
7  
8  
9  
10  
11  
12  
13  
14  
15  
16  
17  
18  
19  
20  
21  
22  
23  
24  
25  
26  
27  
28  
29  
30  
31  
32  
33  
34  
35  
36  
37  
38  
39  
40  
41  
42  
43  
44  
45  
46  
47  
48  
49

|                                 |                                                                                                                      |                                        |                                                                                  |                        |                                                                                                   |
|---------------------------------|----------------------------------------------------------------------------------------------------------------------|----------------------------------------|----------------------------------------------------------------------------------|------------------------|---------------------------------------------------------------------------------------------------|
| <p>Gelaye et al. (2011)</p>     | <p>Country:<br/>Ethiopia</p> <p>Setting: General hospital</p> <p>Age (yrs): 34.9 (SD=11.6)</p> <p>Female: 63.1 %</p> | <p>N = 363</p> <p>Depressed: 12.6%</p> | <p>Administration:<br/>Researcher-administered</p> <p>Language:<br/>Amharic</p>  | <p>DSM-IV<br/>SCAN</p> | <p>a) No COI declaration<br/>b) Funding acknowledged (academic /health research institutions)</p> |
| <p>Gjerdingen et al. (2009)</p> | <p>Country: US</p> <p>Setting: Community</p> <p>Age (yrs): M = 29.3</p> <p>Female: 100%</p>                          | <p>N = 438</p> <p>Depressed: 4.6%</p>  | <p>Administration:<br/>Telephone or self-report</p> <p>Language:<br/>English</p> | <p>DSM-IV<br/>SCID</p> | <p>a) No COI declaration<br/>b) Funding acknowledged (academic /health research institutions)</p> |
| <p>Henkel et al. (2004)</p>     | <p>Country:<br/>Germany</p> <p>Setting: primary care</p> <p>Age (yrs): not reported</p> <p>Female: 74%</p>           | <p>N = 448</p> <p>Depressed: 10%</p>   | <p>Administration:<br/>self-report</p> <p>Language:<br/>German</p>               | <p>DSM-IV<br/>CIDI</p> | <p>a) No COI declaration<br/>b) Funding acknowledged (academic /health research institutions)</p> |

|                                                                                                                                  |                         |                                                                                                                            |                                                         |                                                                   |             |                                                                                                                                                          |
|----------------------------------------------------------------------------------------------------------------------------------|-------------------------|----------------------------------------------------------------------------------------------------------------------------|---------------------------------------------------------|-------------------------------------------------------------------|-------------|----------------------------------------------------------------------------------------------------------------------------------------------------------|
| 1<br>2<br>3<br>4<br>5<br>6<br>7<br>8<br>9<br>10<br>11<br>12<br>13<br>14<br>15                                                    | Hyphantis et al. (2011) | Country: Greece<br><br>Setting: Hospital – rheumatology patients<br><br>Age (yrs): M = 54.2 (SD = 13.5)<br><br>Female: 74% | N = 213<br><br>Depressed: 32.4%                         | Administration: Researcher administered<br><br>Language: Greek    | DSM-IV MINI | a) No COI declaration<br>b) No funding acknowledgement                                                                                                   |
| 16<br>17<br>18<br>19<br>20<br>21<br>22<br>23<br>24<br>25<br>26<br>27                                                             | Inagaki et al. (2013)   | Country: Japan<br><br>Setting: General hospital<br><br>Age whole sample (yrs): M = 73.5 (SD = 12.3)<br><br>Female: 59.3%   | N = 104 out of 511 received MINI<br><br>Depressed: 7.4% | Administration: Researcher administered<br><br>Language: Japanese | DSM-IV MINI | a) COI declaration: ‘The authors declare that they have no competing interests.’<br><br>b) Funding acknowledged (academic /health research institutions) |
| 28<br>29<br>30<br>31<br>32<br>33<br>34<br>35<br>36<br>37<br>38<br>39<br>40<br>41<br>42<br>43<br>44<br>45<br>46<br>47<br>48<br>49 | Khamseh et al. (2011)   | Country: Iran<br><br>Setting: Diabetes clinic<br><br>Age (yrs): M = 56.17 (SD = 9.60)<br><br>Female: 51.9%                 | N = 185<br><br>Depressed: 43.2%                         | Administration: Self report<br><br>Language: Persian              | DSM-IV SCID | a) COI declaration: The authors declared no competing interests<br>b) Funding acknowledged (academic /health research institutions)                      |

1  
2  
3  
4  
5  
6  
7  
8  
9  
10  
11  
12  
13  
14  
15  
16  
17  
18  
19  
20  
21  
22  
23  
24  
25  
26  
27  
28  
29  
30  
31  
32  
33  
34  
35  
36  
37  
38  
39  
40  
41  
42  
43  
44  
45  
46  
47  
48  
49

|                        |                                                                                                                                    |                                                    |                                                       |                |                                                                                                              |
|------------------------|------------------------------------------------------------------------------------------------------------------------------------|----------------------------------------------------|-------------------------------------------------------|----------------|--------------------------------------------------------------------------------------------------------------|
| Lamers et al. (2008)   | Country:<br>Netherlands<br><br>Setting: Primary care (elderly)<br><br>Age (yrs): M = 71.4 (SD = 6.90)<br><br>Female: 48.2%         | N = 713<br><br>Depressed: 10.7%                    | Administration:<br>Self report<br><br>Language: Dutch | DSM-IV<br>MINI | a) No COI declaration<br>b) Funding acknowledged (academic /health research institutions)                    |
| Lotrakul et al. (2008) | Country:<br>Thailand<br><br>Setting: Primary care<br><br>Age (yrs): M = 45.0 (SD = 14.30)<br><br>Female: 73.7%                     | N = 279<br><br>Depressed: 6.8%                     | Administration:<br>Self report<br><br>Language: Thai  | DSM-IV<br>MINI | a) No COI declaration<br>b) Funding acknowledged (academic /health research institutions)                    |
| Persoons et al. (2003) | Country:<br>Belgium<br><br>Setting: Hospital (otolaryngology patients)<br><br>Age (yrs): M = 48.2 (SD = 12.9)<br><br>Female: 65.6% | N = 268 (97 received MINI)<br><br>Depressed: 16.5% | Administration:<br>Self-report<br><br>Language: Dutch | DSM-IV<br>MINI | a) No COI declaration<br>b) Funding acknowledged (academic /health research institutions) and Pfizer Belgium |

|                        |                                                                                                                                      |                                |                                                      |                |                                                                                                                                                                                                        |
|------------------------|--------------------------------------------------------------------------------------------------------------------------------------|--------------------------------|------------------------------------------------------|----------------|--------------------------------------------------------------------------------------------------------------------------------------------------------------------------------------------------------|
| Picardi et al. (2005)  | Country: Italy<br><br>Setting: Hospital (dermatology inpatients)<br><br>Age (yrs): M = 37.5<br><br>Female: 56%                       | N = 141<br><br>Depressed: 8.5% | Administration: Self-report<br><br>Language: Italian | DSM-IV<br>SCID | a) No COI declaration<br>b) Funding acknowledged (academic /health research institutions). Acknowledged Pfizer Italia SRL for providing the Italian version of the PHQ-9 and for permission to use it. |
| Stafford et al. (2007) | Country: Australia<br><br>Setting: Hospital (cardiology patients)<br><br>Age (yrs): M = 64.1 (SD = 10.3)<br><br>Female: 66%          | N = 193<br><br>Depressed: 18%  | Administration: Self-report<br><br>Language: English | DSM-IV<br>MINI | a) No COI declaration<br>b) Funding acknowledged (academic/health research institutions)                                                                                                               |
| Thombs et al. (2008)   | Country: US<br><br>Setting: Hospital (outpatients with coronary heart disease)<br><br>Age (yrs): M = 67 (SD = 11)<br><br>Female: 18% | N = 1024<br><br>Depressed: 22% | Administration: Not stated<br><br>Language: English  | DSM<br>C-DIS   | a) COI declaration "None disclosed"<br>b) Funding acknowledged (academic/health research institutions)                                                                                                 |

1  
2  
3  
4  
5  
6  
7  
8  
9  
10  
11  
12  
13  
14  
15  
16  
17  
18  
19  
20  
21  
22  
23  
24  
25  
26  
27  
28  
29  
30  
31  
32  
33  
34  
35  
36  
37  
38  
39  
40  
41  
42  
43  
44  
45  
46  
47  
48  
49

|                        |                                                                                                                  |                               |                                                            |             |                                                                                                            |
|------------------------|------------------------------------------------------------------------------------------------------------------|-------------------------------|------------------------------------------------------------|-------------|------------------------------------------------------------------------------------------------------------|
| Thompson et al. (2010) | Country: US<br><br>Setting: Patients with Parkinson Disease<br><br>Age (yrs): 72.5 (SD = 9.6)<br><br>Female: 42% | N = 214<br><br>Depressed: 14% | Administration: Self administered<br><br>Language: English | DSM-IV SCID | a) No COI declaration<br>b) Funding acknowledged (academic/health research institutions)                   |
| Turner et al. (2012)   | Country: Australia<br><br>Setting: Stroke patients<br><br>Age (yrs): 66.7 (SD = 13.1)<br><br>Female: 47.2%       | N = 72<br><br>Depressed: 18%  | Administration: Self administered<br><br>Language: English | DSM-IV SCID | a) COI declaration: Disclosures 'None'.<br>b) Funding acknowledged (academic/health research institutions) |

|                                                                                                                                                                            |                                  |                                                                                                                       |                             |                                                             |                |                                                                                                                                                                                                               |
|----------------------------------------------------------------------------------------------------------------------------------------------------------------------------|----------------------------------|-----------------------------------------------------------------------------------------------------------------------|-----------------------------|-------------------------------------------------------------|----------------|---------------------------------------------------------------------------------------------------------------------------------------------------------------------------------------------------------------|
| 1<br>2<br>3<br>4<br>5<br>6<br>7<br>8<br>9<br>10<br>11<br>12<br>13<br>14<br>15<br>16<br>17<br>18<br>19<br>20                                                                | van Steenberg-Weijnenburg (2010) | Country:<br>Netherlands<br><br>Setting: Diabetes patients<br><br>Age (yrs): M = 61.8 (SD = 13.6)<br><br>Female: 48.7% | N = 197<br>Depressed: 18.8% | Administration:<br>Self administered<br><br>Language: Dutch | DSM-IV<br>SCID | a) COI declaration: 'The authors declare that they have no competing interests'.<br>b) Funding acknowledged (academic/health research institutions) - 'this had no influence on the content of this article'. |
| 21<br>22<br>23<br>24<br>25<br>26<br>27<br>28<br>29<br>30<br>31<br>32<br>33<br>34<br>35<br>36<br>37<br>38<br>39<br>40<br>41<br>42<br>43<br>44<br>45<br>46<br>47<br>48<br>49 | Zuithoff et al. (2010)           | Country:<br>Netherlands<br><br>Setting: Primary care<br><br>Age (yrs): M = 51 (sd = 16.7)<br><br>Female: 63%          | N = 1338<br>Depressed: 13%  | Administration:<br>Self-report<br><br>Language: Dutch       | DSM-IV<br>CIDI | a) COI declaration 'The authors declare that they have no competing interests.'<br>b) Funding acknowledged (academic/health research institutions).                                                           |

**Table 2: Descriptive characteristics of the summed items scoring method studies cut-off point 10 (Moriarty et al, 2015)**

| Study                           | Sample characteristics                                                                                                                     | Sample size and % MDD                                                          | PHQ-9 characteristics                                                         | Diagnostic standard | Conflict of interest (COI) declaration<br>Funding<br>c) Relationship with original developers              |
|---------------------------------|--------------------------------------------------------------------------------------------------------------------------------------------|--------------------------------------------------------------------------------|-------------------------------------------------------------------------------|---------------------|------------------------------------------------------------------------------------------------------------|
| 13. Gräfe et al. (2004)         | Country: Germany<br><br>Setting: psychosomatic walk-in clinics and family practices<br><br>Mean age: 41.9 (SD = 13.8)<br><br>Female: 67.8% | N = 528<br><br>Depressed: 29.2% psychosomatic patients; 6.16% medical patients | Administration: self-report<br><br>Language: German<br><br>Cut-offs: 10 to 14 | DSM-IV SCID         | No COI declaration<br>Acknowledged funding from Pfizer<br>Not acknowledged                                 |
| 16. Kroenke et al. (2001)       | Country: USA<br><br>Setting: Primary care<br><br>Mean age: 46 (SD=17)<br><br>Female: 66%                                                   | N = 580<br><br>7.1% MDD                                                        | Administration: Self-report<br><br>Language: English<br><br>Cut-offs: 9 to 15 | DSM-IV SCID         | a) No COI declaration<br>b) Acknowledged funding from Pfizer<br>c) N/A                                     |
| 22. Navinés et al. (2012)       | Country: Spain<br><br>Setting: General hospital (patients with chronic HCV)<br><br>Mean age: 43.4 (SD = 10.2)<br><br>Female: 28.6%         | N = 500<br><br>6.4% MDD                                                        | Administration: Self-report<br><br>Language: Spanish<br><br>Cut-offs: 10      | DSM-IV SCID         | a) All authors declared that they had no COI.<br>b) Role of funding source declared<br>c) Not acknowledged |
| 29. Thekkumpurath et al. (2010) | Country: UK<br><br>Setting: Hospital (cancer patients)<br><br>Mean age: 61<br><br>Female: 63%                                              | N = 782<br><br>6.3% MDD (of the whole sample)                                  | Administration: Not stated<br><br>Language: English<br><br>Cut-offs: 5 to 10  | DSM-IV SCID         | c) COI declaration: 'Supported by Cancer Research UK'<br>d) As in a)<br>e) Not acknowledged                |
| 33. Williams et al. (2005)      | Country: USA                                                                                                                               | N = 316                                                                        | Administration: Unclear                                                       | DSM-IV SCID         | a) No COI declaration<br>b) Funding                                                                        |



561

|                          |                                                                                              |                      |                                                                         |             |                                                                                           |
|--------------------------|----------------------------------------------------------------------------------------------|----------------------|-------------------------------------------------------------------------|-------------|-------------------------------------------------------------------------------------------|
|                          | Setting: Secondary care (Post-stroke)<br>Mean age: Unclear<br>Female: Unclear                | 33.5% MDD            | Language: English<br>Cut-offs: 10                                       |             | acknowledged (academic institutions)<br>c) Not acknowledged                               |
| 1. Adewuya et al. (2006) | Country: Nigeria<br>Setting: community (students)<br>Mean age: 24.8 (15-40)<br>Female: 41.2% | N = 512<br>2.5% MDD  | Administration: Self-report<br>Language: English<br>Cut-offs: 8 to 12   | DSM-IV MINI | a) No COI declaration<br>b) No funding declaration                                        |
| 2. Arroll et al. (2010)  | Country: New Zealand<br>Setting: Primary care<br>Mean age: 49 (17-99)<br>Female: 61%         | N = 2642<br>6.2% MDD | Administration: Not stated<br>Language: English<br>Cut-offs: 8,10,12,15 | DSM-IV SCID | a) No COI declaration<br>b) Funding acknowledged (academic /health research institutions) |
| 3. Azah et al. (2005)    | Country: Malaysia<br>Setting: Primary care<br>Mean age: 38.7 (18-79)<br>Female: 61.7%        | N = 180<br>16.6% MDD | Administration: Self-report<br>Language: Malay<br>Cut-offs: 5 to 12     | DSM-IV CIDI | b) No COI declaration<br>c) Funding acknowledged (academic /health research institutions) |
| 4. Chagas et al. (2013)  | Country: Brazil                                                                              | N = 84               | Administration: self-report                                             | DSM-IV SCID | a) COI declaration "None declared"                                                        |

|                                 |                                                                               |                       |                                                                                             |             |                                                                                                                                                                                                                                                                                                                                           |
|---------------------------------|-------------------------------------------------------------------------------|-----------------------|---------------------------------------------------------------------------------------------|-------------|-------------------------------------------------------------------------------------------------------------------------------------------------------------------------------------------------------------------------------------------------------------------------------------------------------------------------------------------|
|                                 | Setting: Secondary care<br>Mean age: Not stated<br>Female: 52.7%              | 25.5% MDD             | Language: Brazilian<br>Cut-offs: 7 to 10                                                    |             | b) Funding acknowledged (academic/health research institutions)                                                                                                                                                                                                                                                                           |
| 6. de Lima Osorio et al. (2009) | Country: Brazil<br>Setting: Primary care<br>Mean age: Unclear<br>Female: 100% | N = 177<br>34% MDD    | Administration: research assistants<br>Language: Brazilian Portuguese<br>Cut-offs: 10 to 15 | DSM-IV SCID | a) No COI declaration<br>b) Funding acknowledged (academic institutions)                                                                                                                                                                                                                                                                  |
| 7. Elderon et al. (2011)        | Country: USA<br>Setting: Secondary care<br>Mean age: Unclear<br>Female: 18%   | N = 1022<br>18.3% MDD | Administration: self-report<br>Language: English<br>Cut-offs: 10                            | C-DIS       | a) COI declaration – ‘No disclosures’<br>b) Funding acknowledged (academic institutions and industry – AHA Pharmaceuticals Roundtable) – ‘The funding organisations had no role in the design or conduct of the study, collection, management, analysis or interpretation of data; or preparation, review or approval of the manuscript.’ |
| 8. Fann et al. (2005)           | Country: US<br>Setting: Trauma hospital (inpatients with traumatic            | N = 135<br>16.3% MDD  | Administration: Telephone-administered<br>Language: English                                 | DSM-IV SCID | b) No COI declaration<br>c) Funding acknowledged (academic                                                                                                                                                                                                                                                                                |

|                          |                                                                                                         |                      |                                                                                      |                  |                                                                                                                                                                                                                                                                                                                                           |
|--------------------------|---------------------------------------------------------------------------------------------------------|----------------------|--------------------------------------------------------------------------------------|------------------|-------------------------------------------------------------------------------------------------------------------------------------------------------------------------------------------------------------------------------------------------------------------------------------------------------------------------------------------|
|                          | brain injury)<br>Mean age: 42 (SD=17.9)<br>Female: 29.1%                                                |                      | Cut-offs: 10                                                                         |                  | institutions)                                                                                                                                                                                                                                                                                                                             |
| 9. Fine et al. (2013)    | Country: USA<br>Setting: Primary care (Ohio Army National Guard)<br>Mean age: 31 (17-60)<br>Female: 12% | N = 498<br>21.5% MDD | Administration:<br>Telephone-administered<br>Language: English<br>Cut-offs: 10,15    | DSM-IV<br>SCID-I | a) COI – last author disclosed financial and consulting interests (Pfizer not one of them). All other authors declared that they have no COI.<br>b) Funding acknowledged – DoD Medical Research. ‘The sponsor had no role in study design, data collection, analysis, interpretation of results, report writing or manuscript submission. |
| 10. Gelaye et al. (2013) | Country: Ethiopia<br>Setting: General hospital<br>Mean age: 34.9 (SD=11.6)<br>Female: 63.1 %            | N = 363<br>12.6% MDD | Administration:<br>Researcher-administered<br>Language: Amharic<br>Cut-offs: 9 to 11 | DSM-IV<br>SCAN   | c) No COI declaration<br>d) Funding acknowledged (academic /health research institutions)                                                                                                                                                                                                                                                 |
| 11. Gilbody et al.       | Country: UK                                                                                             | N = 96               | Administration: Not                                                                  | DSM-IV           | a) COI declaration –                                                                                                                                                                                                                                                                                                                      |

|                              |                                                                                                           |                      |                                                                                 |                |                                                                                                                                                                                               |
|------------------------------|-----------------------------------------------------------------------------------------------------------|----------------------|---------------------------------------------------------------------------------|----------------|-----------------------------------------------------------------------------------------------------------------------------------------------------------------------------------------------|
| (2007)                       | Setting: Primary care<br>Mean age: 42.5 (SD 13.6)<br>Female: 77%                                          | 37.5 MDD             | stated<br>Language: English<br>Cut-offs: 9 to 13                                | SCID           | last author involved in the development of one of the instruments (CORE-OM), 'but does not gain financially from its use.<br>b) Funding acknowledged (academic /health research institutions) |
| 12. Gjerdingen et al. (2009) | Country: USA<br>Setting: Community<br>Mean age: 29.3<br>Female: 100%                                      | N = 438<br>4.6% MDD  | Administration: Telephone or self-report<br>Language: English<br>Cut-offs: 10   | DSM-IV<br>SCID | c) No COI declaration<br>d) Funding acknowledged (academic /health research institutions)                                                                                                     |
| 14. Hyphantis et al. (2011)  | Country: Greece<br>Setting: Hospital – rheumatology patients<br>Mean age: 54.2 (SD = 13.5)<br>Female: 74% | N = 213<br>32.4% MDD | Administration: Researcher administered<br>Language: Greek<br>Cut-offs: 4 to 16 | DSM-IV<br>MINI | c) No COI declaration<br>d) No funding acknowledgement                                                                                                                                        |
| 15. Khamseh et al. (2011)    | Country: Iran<br>Setting: Outpatient diabetic clinic<br>Mean age: 56.1 (SD=9.6)                           | N = 185<br>43.2% MDD | Administration: Self-report<br>Language: Persian<br>Cut-offs: 10,13             | DSM-IV<br>SCID | c) COI declaration: The authors declared no competing interests<br>d) Funding acknowledged (academic /health                                                                                  |

|                            |                                                                                                                              |                                 |                                                                                                       |             |                                                                                                                                                                                    |
|----------------------------|------------------------------------------------------------------------------------------------------------------------------|---------------------------------|-------------------------------------------------------------------------------------------------------|-------------|------------------------------------------------------------------------------------------------------------------------------------------------------------------------------------|
|                            |                                                                                                                              |                                 |                                                                                                       |             | research institutions)                                                                                                                                                             |
| 19. Liu et al. (2011)      | <p>Female: 51.8%</p> <p>Country: Taiwan</p> <p>Setting: Primary care</p> <p>Mean age: Not specified</p> <p>Female: 60.9%</p> | <p>N = 1532</p> <p>3.3% MDD</p> | <p>Administration: Self-report</p> <p>Language: Chinese version</p> <p>Cut-offs: 9 to 11</p>          | SCAN        | <p>a) a) No COI declaration</p> <p>b) Funding acknowledged (academic /health research institutions)</p>                                                                            |
| 20. Lotrakul et al. (2008) | <p>Country: Thailand</p> <p>Setting: Primary care</p> <p>Mean age: 45.0 (SD = 14.30)</p> <p>Female: 73.7%</p>                | <p>N = 279</p> <p>6.8% MDD</p>  | <p>Administration: Self report</p> <p>Language: Thai</p> <p>Cut-offs: 7 to 15</p>                     | DSM-IV MINI | <p>c) No COI declaration</p> <p>d) Funding acknowledged (academic /health research institutions)</p>                                                                               |
| 23. Patel et al. (2008)    | <p>Country: India</p> <p>Setting: Primary care</p> <p>Mean age: 37.5 (18-83)</p> <p>Female: 56.4%</p>                        | <p>N = 299</p> <p>4.3% MDD</p>  | <p>Administration: Face-to-face interview</p> <p>Language: Not specified</p> <p>Cut-offs: 7 to 15</p> | CIS-R       | <p>a) COI declaration – No Declaration of Interest</p> <p>b) Funding acknowledged (academic /health research institutions)</p>                                                     |
| 24. Phelan et al. (2010)   | <p>Country: USA</p> <p>Setting: Primary care (elderly)</p> <p>Mean age: 78 (SD=7)</p> <p>Female: 62%</p>                     | <p>N = 71</p> <p>12% MDD</p>    | <p>Administration: Research assistant</p> <p>Language: English</p> <p>Cut-offs: 8 to 12</p>           | DSM-IV SCID | <p>a) COI declaration – No competing interests</p> <p>b) Funding acknowledged (academic /health research institutions) . ‘The funder had no role in the study design, methods,</p> |

|                              |                                                                                              |                      |                                                                       |                |                                                                                                                                                              |
|------------------------------|----------------------------------------------------------------------------------------------|----------------------|-----------------------------------------------------------------------|----------------|--------------------------------------------------------------------------------------------------------------------------------------------------------------|
|                              |                                                                                              |                      |                                                                       |                | data collection, analysis or interpretation of data, nor any role in the preparation of the manuscript or decision to submit the manuscript for publication. |
| 25. Rooney et al. (2013)     | Country: UK<br>Setting: Secondary care (glioma)<br>Mean age: 54.2 (SD=12.3)<br>Female: 42.6% | N = 129<br>13.5% MDD | Administration: Self-report<br>Language: English<br>Cut-offs: 8 to 11 | DSM-IV<br>SCID | a) COI declaration "The authors declare that they have no COI"<br>b) Funding acknowledged (academic/health research institutions)                            |
| 26. Sherina et al. (2012)    | Country: Malaysia<br>Setting: Primary care<br>Mean age: 30.9 (18-81)<br>Female: 100%         | N= 146<br>21.2% MDD  | Administration: Self-report<br>Language: Malay<br>Cut-offs: 10        | CIDI           | a) COI declaration "The authors declare that they have no competing interests"<br>b) Funding acknowledged (academic/health research institutions)            |
| 27. Sidebottom et al. (2012) | Country: USA<br>Setting: Community (prenatal)<br>Mean age: 23 (SD=5.5)<br>Female: 100%       | N = 745<br>3.6% MDD  | Administration: Interview<br>Language: English<br>Cut-offs: 10        | DSM-IV<br>SCID | b) COI declaration "The authors declare that they have no financial COI"<br>b) Funding acknowledged (academic/health research institutions)                  |
| 28. Stafford et al. (2007)   | Country: Australia<br>Setting: Secondary care (cardiac procedures)                           | N = 193<br>18.1% MDD | Administration: Self-report<br>Language: English                      | DSM-IV<br>MINI | b) No COI declaration<br>c) Funding acknowledged (academic/health                                                                                            |

|                            |                                                                                                                     |                      |                                                                               |              |                                                                                                                                                      |
|----------------------------|---------------------------------------------------------------------------------------------------------------------|----------------------|-------------------------------------------------------------------------------|--------------|------------------------------------------------------------------------------------------------------------------------------------------------------|
|                            | Mean age: 64.14 (38-91)<br>Female: 19.2%                                                                            |                      | Cut-offs: 10                                                                  |              | research institutions)                                                                                                                               |
| 30. Thombs et al. (2008)   | Country: US<br>Setting: Hospital (outpatients with coronary heart disease)<br>Mean age: 67 (SD = 11)<br>Female: 18% | N = 1024<br>22% MDD  | Administration: Not stated<br>Language: English<br>Cut-offs: 7 to 10          | DSM C-DIS    | b) COI declaration "None disclosed"<br>b) Funding acknowledged (academic/health research institutions)                                               |
| 32. Watnick et al. (2005)  | Country: USA<br>Setting: Secondary care (dialysis)<br>Mean age: 63 (SD=15)<br>Female: 32.3%                         | N = 62<br>19% MDD    | Administration: Self-report<br>Language: English<br>Cut-offs: 10              | DSM-IV SCID  | b) No COI declaration<br>c) Funding acknowledged (academic/health research institutions)                                                             |
| 34. Wittkamp et al. (2009) | Country: Netherlands<br>Setting: Primary care<br>Mean age: 49.8<br>Female: 66.7%                                    | N = 664<br>12.3% MDD | Administration: Self-report<br>Language: Not specified<br>Cut-offs: 10 and 15 | DSM-IV SCIDI | No COI declaration<br>b) Funding acknowledged (academic/health research institutions)                                                                |
| 35. Zhang et al. (2013)    | Country: Hong Kong<br>Setting: Secondary care (diabetic outpatients)<br>Mean age: 55.1 (SD=9.5)                     | N = 99<br>23.2% MDD  | Administration: Self-report<br>Language: Chinese version<br>Cut-offs: 15      | DSM-IV MINI  | COI declaration – last author acknowledged financial COI. The other authors declare that they have no competing interests.<br>) Funding acknowledged |

1  
2  
3  
4  
5  
6  
7  
8  
9  
10  
11  
12  
13  
14  
15  
16  
17  
18  
19  
20  
21  
22  
23  
24  
25  
26  
27  
28  
29  
30  
31  
32  
33  
34  
35  
36  
37  
38  
39  
40  
41  
42  
43  
44  
45  
46  
47  
48  
49

|                            |                                                                                               |                                |                                                    |                |                                                                                                                                                       |
|----------------------------|-----------------------------------------------------------------------------------------------|--------------------------------|----------------------------------------------------|----------------|-------------------------------------------------------------------------------------------------------------------------------------------------------|
|                            | Female: 40.8%                                                                                 |                                |                                                    |                | (academic/health research institutions)                                                                                                               |
| 36. Zuithoff et al. (2010) | Country: Netherlands<br>Setting: Primary care<br>Age (yrs): M = 51 (sd = 16.7)<br>Female: 63% | N = 1338<br><br>Depressed: 13% | Administration: Self-report<br><br>Language: Dutch | DSM-IV<br>CIDI | b) COI declaration<br>"The authors declare that they have no competing interests."<br>b) Funding acknowledged (academic/health research institutions) |

562  
563

**Table 3: Quality assessment of included studies in the algorithm meta-analysis (Manea et al., 2014)**

| Study                      | Patient selection:           | Patient selection:                                         | Patient selection:               | Patient selection:   | Index test:                               | Index test:                            | Index test:                                     | Index test:          |
|----------------------------|------------------------------|------------------------------------------------------------|----------------------------------|----------------------|-------------------------------------------|----------------------------------------|-------------------------------------------------|----------------------|
|                            | Consecutive or random sample | Avoid case-control / avoid artificially inflated base rate | Avoided inappropriate exclusions | Overall risk of bias | PHQ-9 interpreted blind to reference test | If translated, appropriate translation | If translated, psychometric properties reported | Overall risk of bias |
| <b>Allegiant studies</b>   |                              |                                                            |                                  |                      |                                           |                                        |                                                 |                      |
| Diez-Quevedo et al. (2001) | ✗                            | ✓                                                          | ✗                                | High                 | ?                                         | ✓                                      | ✓                                               | Unclear              |
| Gräfe et al. (2004)        | ✓                            | ✓                                                          | ✓                                | Low                  | ?                                         | ✓                                      | ✓                                               | Unclear              |



|    |                              |   |   |   |         |   |     |     |         |
|----|------------------------------|---|---|---|---------|---|-----|-----|---------|
| 1  |                              |   |   |   |         |   |     |     |         |
| 2  |                              |   |   |   |         |   |     |     |         |
| 3  |                              |   |   |   |         |   |     |     |         |
| 4  |                              |   |   |   |         |   |     |     |         |
| 5  | Lowe et al.                  | ✘ | ✓ | ✓ | High    | ✓ | ✓   | ✓   | Low     |
| 6  | (2004)                       |   |   |   |         |   |     |     |         |
| 7  |                              |   |   |   |         |   |     |     |         |
| 8  | Muramatsu et                 | ? | ✓ | ? | Unclear | ✓ | ✓   | ?   | Unclear |
| 9  | al. (2007)                   |   |   |   |         |   |     |     |         |
| 10 |                              |   |   |   |         |   |     |     |         |
| 11 | Navines et al.               | ✓ | ✓ | ✓ | Low     | ✓ | ✓   | ?   | Unclear |
| 12 | (2012)                       |   |   |   |         |   |     |     |         |
| 13 |                              |   |   |   |         |   |     |     |         |
| 14 | Spitzer et al.               | ✘ | ✓ | ✓ | High    | ✓ | n/a | n/a | Low     |
| 15 | (1999)                       |   |   |   |         |   |     |     |         |
| 16 |                              |   |   |   |         |   |     |     |         |
| 17 | Thekkumpurath                | ✘ | ✘ | ✓ | High    | ✓ | n/a | n/a | Low     |
| 18 | et al. (2010)                |   |   |   |         |   |     |     |         |
| 19 |                              |   |   |   |         |   |     |     |         |
| 20 |                              |   |   |   |         |   |     |     |         |
| 21 | <b>Non-allegiant studies</b> |   |   |   |         |   |     |     |         |
| 22 |                              |   |   |   |         |   |     |     |         |
| 23 | Arroll et al.                | ✓ | ✓ | ✓ | Low     | ✓ | n/a | n/a | Low     |
| 24 | (2010)                       |   |   |   |         |   |     |     |         |
| 25 |                              |   |   |   |         |   |     |     |         |
| 26 | Ayalon et al. (              | ? | ✓ | ✓ | Unclear | ? | ✓   | ?   | Unclear |
| 27 | 2010)                        |   |   |   |         |   |     |     |         |
| 28 |                              |   |   |   |         |   |     |     |         |
| 29 | Eack et al.                  | ? | ✓ | ? | Unclear | ? | n/a | n/a | Unclear |
| 30 | (2006)                       |   |   |   |         |   |     |     |         |
| 31 |                              |   |   |   |         |   |     |     |         |
| 32 | Fann et al.                  | ✓ | ✘ | ✘ | High    | ✓ | n/a | n/a | Low     |
| 33 | (2005)                       |   |   |   |         |   |     |     |         |
| 34 |                              |   |   |   |         |   |     |     |         |
| 35 | Gelaye et al.                | ? | ✘ | ? | High    | ✓ | ✓   | ?   | Unclear |
| 36 | (2013)                       |   |   |   |         |   |     |     |         |
| 37 |                              |   |   |   |         |   |     |     |         |
| 38 | Gjerdingen et                | ✓ | ✓ | ✓ | Low     | ? | n/a | n/a | Unclear |
| 39 |                              |   |   |   |         |   |     |     |         |
| 40 |                              |   |   |   |         |   |     |     |         |
| 41 |                              |   |   |   |         |   |     |     |         |
| 42 |                              |   |   |   |         |   |     |     |         |
| 43 |                              |   |   |   |         |   |     |     |         |
| 44 |                              |   |   |   |         |   |     |     |         |
| 45 |                              |   |   |   |         |   |     |     |         |
| 46 |                              |   |   |   |         |   |     |     |         |
| 47 |                              |   |   |   |         |   |     |     |         |
| 48 |                              |   |   |   |         |   |     |     |         |
| 49 |                              |   |   |   |         |   |     |     |         |

1  
2  
3  
4  
5  
6  
7  
8  
9  
10  
11  
12  
13  
14  
15  
16  
17  
18  
19  
20  
21  
22  
23  
24  
25  
26  
27  
28  
29  
30  
31  
32  
33  
34  
35  
36  
37  
38  
39  
40  
41  
42  
43  
44  
45  
46  
47  
48  
49

al. (2009)

|                         |   |   |   |         |   |     |     |         |
|-------------------------|---|---|---|---------|---|-----|-----|---------|
| Henkel et al. (2004)    | ✓ | ✓ | ✓ | Low     | ? | n/a | n/a | Unclear |
| Hyphantis et al. (2011) | ✓ | ✓ | ✗ | High    | ✓ | ?   | ?   | Unclear |
| Inagaki et al. (2013)   | ✓ | ✗ | ✓ | High    | ✓ | ?   | ?   | Unclear |
| Khamseh et al. (2011)   | ✓ | ✓ | ? | Unclear | ✓ | ✓   | ?   | Unclear |
| Lamers et al (2008)     | ✓ | ✗ | ✗ | High    | ✓ | ?   | ?   | Unclear |
| Lotrakul et al. (2008)  | ✗ | ✓ | ? | High    | ✓ | ✓   | ?   | Unclear |
| Persoons et al. (2003)  | ✓ | ✓ | ✓ | Low     | ✓ | ✓   | n/a | Low     |
| Picardi et al. (2005)   | ✓ | ✓ | ✓ | Low     | ✓ | ?   | ?   | Unclear |
| Stafford et al. (2007)  | ✓ | ✓ | ✓ | Low     | ✓ | n/a | n/a | Low     |
| Thombs et al. (2008)    | ✗ | ✓ | ? | Unclear | ? | n/a | n/a | Unclear |
| Thomson et              | ? | ✓ | ✓ | Unclear | ? | n/a | n/a | Unclear |

For peer review only

|                                 |   |   |   |         |   |     |     |         |  |
|---------------------------------|---|---|---|---------|---|-----|-----|---------|--|
| al. (2011)                      |   |   |   |         |   |     |     |         |  |
| Turner et al. (2012)            | ✓ | ✓ | ✓ | Low     | ✓ | n/a | n/a | Low     |  |
| Van Steenberg-Wijnenburg (2010) | ? | ✓ | ✓ | Unclear | ? | ?   | ?   | Unclear |  |
| Zuithoff et al. (2010)          | ✓ | ✓ | ✓ | Low     | ✓ | ✓   | ?   | Unclear |  |

✓ = criterion met; ✗ = criterion not met; ? = insufficient information to code whether criterion met; n/a = not applicable

564

**Table 3: Quality assessment of included studies in the algorithm meta-analysis (Manea et al., 2014) (continued)**

| Study                      | Reference test:                                      | Reference test:                           | Reference test:                        | Reference test:                                 | Reference test:      | Flow / timing:                | Flow / timing:                               | Flow / timing:                         | Flow / timing:       |
|----------------------------|------------------------------------------------------|-------------------------------------------|----------------------------------------|-------------------------------------------------|----------------------|-------------------------------|----------------------------------------------|----------------------------------------|----------------------|
|                            | Reference test correctly classifies target condition | Reference test interpreted blind to PHQ-9 | If translated, appropriate translation | If translated, psychometric properties reported | Overall risk of bias | Interval of two weeks or less | All participants receive same reference test | All participants included in analysis? | Overall risk of bias |
| <b>Allegiant studies</b>   |                                                      |                                           |                                        |                                                 |                      |                               |                                              |                                        |                      |
| Diez-Quevedo et al. (2001) | ✓                                                    | ✓                                         | ✓                                      | ?                                               | Unclear              | ✓                             | ✓                                            | ✓                                      | Low                  |

|    |                              |   |   |     |     |         |   |   |   |         |
|----|------------------------------|---|---|-----|-----|---------|---|---|---|---------|
| 1  |                              |   |   |     |     |         |   |   |   |         |
| 2  |                              |   |   |     |     |         |   |   |   |         |
| 3  |                              |   |   |     |     |         |   |   |   |         |
| 4  |                              |   |   |     |     |         |   |   |   |         |
| 5  | Gräfe et al.                 | ✓ | ? | n/a | n/a | Unclear | ✓ | ✓ | ✓ | Low     |
| 6  | (2004)                       |   |   |     |     |         |   |   |   |         |
| 7  |                              |   |   |     |     |         |   |   |   |         |
| 8  | Lowe et al.                  | ✓ | ✓ | n/a | n/a | Low     | ✓ | ✓ | ✓ | Low     |
| 9  | (2004)                       |   |   |     |     |         |   |   |   |         |
| 10 |                              |   |   |     |     |         |   |   |   |         |
| 11 | Muramatsu et                 | ✓ | ✓ | ✓   | ✓   | Low     | ✓ | ✓ | ? | Unclear |
| 12 | al. (2007)                   |   |   |     |     |         |   |   |   |         |
| 13 |                              |   |   |     |     |         |   |   |   |         |
| 14 | Navines et al.               | ✓ | ✓ | ?   | ?   | Unclear | ✓ | ✓ | ✓ | Low     |
| 15 | (2012)                       |   |   |     |     |         |   |   |   |         |
| 16 |                              |   |   |     |     |         |   |   |   |         |
| 17 | Spitzer et al.               | ✓ | ✓ | n/a | n/a | Low     | ✓ | ✓ | ✗ | High    |
| 18 | (1999)                       |   |   |     |     |         |   |   |   |         |
| 19 |                              |   |   |     |     |         |   |   |   |         |
| 20 | Thekkumpurath                | ✓ | ✓ | n/a | n/a | Low     | ? | ✓ | ✗ | High    |
| 21 | et al. (2010)                |   |   |     |     |         |   |   |   |         |
| 22 |                              |   |   |     |     |         |   |   |   |         |
| 23 |                              |   |   |     |     |         |   |   |   |         |
| 24 | <b>Non-allegiant studies</b> |   |   |     |     |         |   |   |   |         |
| 25 |                              |   |   |     |     |         |   |   |   |         |
| 26 | Arroll et al.                | ✓ | ✓ | n/a | n/a | Low     | ✓ | ✓ | ✓ | Low     |
| 27 | (2010)                       |   |   |     |     |         |   |   |   |         |
| 28 |                              |   |   |     |     |         |   |   |   |         |
| 29 | Ayalon et al. (              | ✓ | ? | ✓   | ?   | Unclear | ? | ✓ | ✓ | Unclear |
| 30 | 2010)                        |   |   |     |     |         |   |   |   |         |
| 31 |                              |   |   |     |     |         |   |   |   |         |
| 32 | Eack et al.                  | ✓ | ? | n/a | n/a | Unclear | ? | ✓ | ? | Unclear |
| 33 | (2006)                       |   |   |     |     |         |   |   |   |         |
| 34 |                              |   |   |     |     |         |   |   |   |         |
| 35 | Fann et al.                  | ✓ | ? | n/a | n/a | Unclear | ✓ | ✓ | ✗ | High    |
| 36 | (2005)                       |   |   |     |     |         |   |   |   |         |
| 37 |                              |   |   |     |     |         |   |   |   |         |
| 38 | Gelaye et al.                | ✓ | ✓ | ✓   | ✓   | Low     | ✓ | ✓ | ✗ | High    |
| 39 |                              |   |   |     |     |         |   |   |   |         |
| 40 |                              |   |   |     |     |         |   |   |   |         |
| 41 |                              |   |   |     |     |         |   |   |   |         |
| 42 |                              |   |   |     |     |         |   |   |   |         |
| 43 |                              |   |   |     |     |         |   |   |   |         |
| 44 |                              |   |   |     |     |         |   |   |   |         |
| 45 |                              |   |   |     |     |         |   |   |   |         |
| 46 |                              |   |   |     |     |         |   |   |   |         |
| 47 |                              |   |   |     |     |         |   |   |   |         |
| 48 |                              |   |   |     |     |         |   |   |   |         |
| 49 |                              |   |   |     |     |         |   |   |   |         |

(2013)

|                          |   |   |     |     |         |   |   |   |         |
|--------------------------|---|---|-----|-----|---------|---|---|---|---------|
| Gjerdingen et al. (2009) | ✓ | ? | n/a | n/a | Unclear | ✓ | ✓ | ✗ | High    |
| Henkel et al. (2004)     | ✓ | ? | n/a | n/a | Unclear | ✓ | ✓ | ✗ | High    |
| Hyphantis et al. (2011)  | ✓ | ✓ | ?   | ?   | Unclear | ✓ | ✓ | ✗ | High    |
| Inagaki et al. (2013)    | ✓ | ✓ | ✓   | ?   | Unclear | ✓ | ✓ | ✗ | High    |
| Khamseh et al. (2011)    | ✓ | ✓ | ✓   | ?   | Unclear | ✓ | ✓ | ? | Unclear |
| Lamers et al. (2008)     | ✓ | ✓ | ?   | ?   | Unclear | ? | ✓ | ✗ | High    |
| Lotrakul et al. (2008)   | ✓ | ✓ | ✓   | ✓   | Low     | ? | ✓ | ✗ | High    |
| Persoons et al. (2003)   | ✓ | ✓ | ?   | ?   | Unclear | ✓ | ✓ | ✓ | Low     |
| Picardi et al. (2005)    | ✓ | ✓ | ✓   | ?   | Unclear | ✓ | ✓ | ✗ | High    |
| Stafford et al. (2007)   | ✓ | ✓ | n/a | n/a | Low     | ✓ | ✓ | ✗ | High    |
| Thombs et al.            | ? | ✓ | n/a | n/a | Unclear | ✓ | ✓ | ✓ | Low     |

Table 4: Quality assessment of included studies in the summed item scoring method cut-off point 10 meta-analysis (Moriarty et al., 2015)

(2008)

|                                |   |   |     |     |         |   |   |   |         |
|--------------------------------|---|---|-----|-----|---------|---|---|---|---------|
| Thompson et al. (2011)         | ✓ | ? | n/a | n/a | Unclear | ✓ | ✓ | ✗ | High    |
| Turner et al. (2012)           | ✓ | ? | n/a | n/a | Unclear | ? | ✓ | ✗ | High    |
| Van Steenberg-Wijenburg (2010) | ✓ | ✗ | ?   | ?   | High    | ✓ | ✓ | ✗ | High    |
| Zuithoff et al. (2010)         | ✓ | ✓ | ?   | ?   | Unclear | ? | ✓ | ✓ | Unclear |

✓ = criterion met; ✗ = criterion not met; ? = insufficient information to code whether criterion met; n/a = not applicable

565

566

567

568

569

570

571

572

| Study                           | Patient selection:           | Patient selection:                                         | Patient selection:               | Patient selection:   | Index test:                               | Index test:                    | Index test:                            | Index test:                                     | Index test:          |
|---------------------------------|------------------------------|------------------------------------------------------------|----------------------------------|----------------------|-------------------------------------------|--------------------------------|----------------------------------------|-------------------------------------------------|----------------------|
|                                 | Consecutive or random sample | Avoid case-control / avoid artificially inflated base rate | Avoided inappropriate exclusions | Overall risk of bias | PHQ-9 interpreted blind to reference test | Was a threshold pre-specified? | If translated, appropriate translation | If translated, psychometric properties reported | Overall risk of bias |
| <b>Allegiant studies</b>        |                              |                                                            |                                  |                      |                                           |                                |                                        |                                                 |                      |
| 13. Gräfe et al. (2004)         | ✓                            | ✓                                                          | ✓                                | Low                  | ?                                         | ✓                              | ✓                                      | ✓                                               | Unclear              |
| 16. Kroenke et al. (2011)       | ✓                            | ✓                                                          | ✓                                | Low                  | ✓                                         | ✓                              | n/a                                    | n/a                                             | Low                  |
| 22. Navinés et al. (2012)       | ✓                            | ✓                                                          | ✓                                | Low                  | ✓                                         | ✓                              | ✓                                      | ?                                               | Unclear              |
| 29. Thekkumpurath et al. (2010) | ✗                            | ✗                                                          | ✓                                | High                 | ✓                                         | ✓                              | n/a                                    | n/a                                             | Low                  |
| 33. Williams et al. (2005)      | ✓                            | ✓                                                          | ✓                                | Low                  | ?                                         | ✓                              | n/a                                    | n/a                                             | Unclear              |
| <b>Non-allegiant studies</b>    |                              |                                                            |                                  |                      |                                           |                                |                                        |                                                 |                      |
| 1. Adewuya et                   | ✓                            | ✓                                                          | ✗                                | Unclear              | ✓                                         | ✓                              | n/a                                    | n/a                                             | Low                  |

1  
2  
3  
4  
5  
6  
7  
8  
9  
10  
11  
12  
13  
14  
15  
16  
17  
18  
19  
20  
21  
22  
23  
24  
25  
26  
27  
28  
29  
30  
31  
32  
33  
34  
35  
36  
37  
38  
39  
40  
41  
42  
43  
44  
45  
46  
47  
48  
49

|                                 |   |   |   |         |   |   |     |     |         |  |
|---------------------------------|---|---|---|---------|---|---|-----|-----|---------|--|
| al. (2006)                      |   |   |   |         |   |   |     |     |         |  |
| 2. Arroll et al. (2010)         | ✓ | ✓ | ✓ | Low     | ✓ | ✓ | n/a | n/a | Low     |  |
| 3. Azah et al. (2005)           | ✓ | ✗ | ? | High    | ✓ | ✓ | ✓   | ✓   | Low     |  |
| 4. Chagas et al. (2013)         | ✓ | ✓ | ✓ | Low     | ✓ | ✓ | ✓   | ✓   | Low     |  |
| 6. de Lima Osorio et al. (2009) | ✓ | ✗ | ✓ | High    | ? | ✗ | n/a | n/a | High    |  |
| 7. Elderon et al. (2011)        | ✓ | ✓ | ✓ | Low     | ✓ | ✓ | n/a | n/a | Low     |  |
| 8. Fann et al. (2005)           | ✓ | ✗ | ✗ | High    | ✓ | ✓ | n/a | n/a | Low     |  |
| 9. Fine et al. (2013)           | ✓ | ✓ | ✓ | Low     | ? | ✓ | n/a | n/a | Unclear |  |
| 10. Gelaye et al. (2013)        | ? | ✗ | ? | High    | ✓ | ✗ | ✓   | ?   | High    |  |
| 11. Gilbody et al.              | ? | ✓ | ? | Unclear | ✓ | ✓ | n/a | n/a | Low     |  |



1  
2  
3  
4  
5 (2007)  
6  
7  
8 12. Gjerdingen et  
9 al. (2009) ✓ ✓ ✓ Low ? ✓ n/a n/a Unclear  
10  
11 14. Hyphantis et  
12 al. (2011) ✓ ✗ ✓ High ✓ ✓ ? ? Unclear  
13  
14 15. Khamseh et  
15 al. (2011) ✓ ✓ ? Unclear ✓ ✓ ✓ ? Unclear  
16  
17  
18 19. Liu et al.  
19 (2011) ✓ ✓ ? Unclear ✓ ✗ ✓ ? High  
20  
21  
22 20. Lotrakul et  
23 al. (2008) ✗ ✓ ? Unclear ✓ ✓ ✓ ? Unclear  
24  
25  
26 23. Patel et al.  
27 (2008) ✓ ✓ ✓ Low ✓ ✓ ? ? Unclear  
28  
29  
30 24. Phelan et al.  
31 (2010) ✗ ✓ ✓ High ✓ ✗ n/a n/a High  
32  
33  
34 25. Rooney et al.  
35 (2013) ✓ ✓ ✓ Low ? ✗ n/a n/a High  
36  
37  
38 26. Sherina et al. ✓ ✓ ✗ High ✓ ✓ ✓ ✓ Low  
39  
40  
41  
42  
43  
44  
45

1  
2  
3  
4  
5  
6  
7  
8  
9  
10  
11  
12  
13  
14  
15  
16  
17  
18  
19  
20  
21  
22  
23  
24  
25  
26  
27  
28  
29  
30  
31  
32  
33  
34  
35  
36  
37  
38  
39  
40  
41  
42  
43  
44  
45  
46  
47  
48  
49

|     |                          |   |   |   |         |   |   |     |     |         |
|-----|--------------------------|---|---|---|---------|---|---|-----|-----|---------|
|     | (2012)                   |   |   |   |         |   |   |     |     |         |
| 27. | Sidebottom et al. (2012) | ✓ | ✓ | ✓ | Low     | ✓ | ✓ | n/a | n/a | Low     |
| 28. | Stafford et al. (2007)   | ✓ | ✓ | ✓ | Low     | ✓ | ✓ | n/a | n/a | Low     |
| 30. | Thombs et al. (2008)     | ✗ | ✓ | ? | High    | ✓ | ? | n/a | n/a | Unclear |
| 32. | Watnick et al. (2005)    | ? | ✗ | ✓ | High    | ✓ | ✓ | n/a | n/a | Low     |
| 34. | Wittkamp et al. (2009)   | ✓ | ✓ | ✓ | Low     | ✓ | ? | n/a | n/a | Unclear |
| 35. | Zhang et al. (2013)      | ✓ | ✓ | ? | Unclear | ? | ✓ | ?   | ?   | Unclear |
| 36. | Zuithoff et al. (2010)   | ✓ | ✓ | ✓ | Low     | ✓ | ✓ | ✓   | ?   | Unclear |

573

**Table 4: Quality assessment of included studies in the summed item scoring method cut-off point 10 meta-analysis (Moriarty et al., 2015) (continued)**

| Study | Reference test: | Reference test: | Reference test: | Reference test:             | Reference test: | Flow / timing:  | Flow / timing:   | Flow / timing:   | Flow / timing:  |
|-------|-----------------|-----------------|-----------------|-----------------------------|-----------------|-----------------|------------------|------------------|-----------------|
|       | Reference test  | Reference test  | If translated,  | If translated, psychometric | Overall risk of | Interval of two | All participants | All participants | Overall risk of |

|                                       | correctly<br>classifies<br>target<br>condition | interpreted<br>blind to<br>PHQ-9 | appropriate<br>translation | properties<br>reported | bias    | weeks or<br>less | receive<br>same<br>reference<br>test | included in<br>analysis? | bias    |
|---------------------------------------|------------------------------------------------|----------------------------------|----------------------------|------------------------|---------|------------------|--------------------------------------|--------------------------|---------|
| <b>Allegiant studies</b>              |                                                |                                  |                            |                        |         |                  |                                      |                          |         |
| 13. Gräfe et al.<br>(2004)            | ✓                                              | ?                                | n/a                        | n/a                    | Unclear | ✓                | ✓                                    | ✓                        | Low     |
| 16. Kroenke et<br>al. (2011)          | ✓                                              | ✓                                | n/a                        | n/a                    | Low     | ✓                | ✓                                    | ✓                        | Low     |
| 22. Navinés et<br>al. (2012)          | ✓                                              | ✓                                | ?                          | ?                      | Unclear | ✓                | ✓                                    | ✓                        | Low     |
| 29.<br>Thekkumpurath<br>et al. (2010) | ✓                                              | ✓                                | n/a                        | n/a                    | Low     | ?                | ✓                                    | ✓                        | Unclear |
| 33. Williams et<br>al. (2005)         | ✓                                              | ?                                | n/a                        | n/a                    | Unclear | ?                | ✓                                    | ✓                        | Unclear |
| <b>Non-allegiant studies</b>          |                                                |                                  |                            |                        |         |                  |                                      |                          |         |
| 1. Adewuya et<br>al. (2006)           | ✓                                              | ✓                                | n/a                        | n/a                    | Low     | ✓                | ✓                                    | ✓                        | Low     |
| 2. Arroll et al.                      | ✓                                              | ✓                                | n/a                        | n/a                    | Low     | ?                | ✓                                    | ✓                        | Unclear |

(2010)

3. Azah et al.  
(2005)

✓

✓

✓

✓

Low

✓

✓

✗

High

4. Chagas et al.  
(2013)

✓

✓

?

?

Unclear

✓

✓

✗

High

6. de Lima  
Osorio et al.  
(2009)

✓

?

n/a

n/a

Unclear

?

✓

✓

Unclear

7. Elderon et al.  
(2011)

✓

✓

n/a

n/a

Low

✓

✓

✓

Low

8. Fann et al.  
(2005)

✓

?

n/a

n/a

Unclear

✓

✓

✗

High

9. Fine et al.  
(2013)

✓

?

n/a

n/a

Unclear

?

✓

✓

Unclear

10. Gelaye et  
al. (2013)

✓

✓

✓

✓

Low

✓

✓

✗

High

11. Gilbody et  
al. (2007)

✓

✓

n/a

n/a

Low

?

✓

✓

Unclear

12. Gjerdingen

✓

?

n/a

n/a

Unclear

✓

✓

✗

High

1  
2  
3  
4  
5 et al. (2009)  
6

7  
8 14. Hyphantis  
9 et al. (2011)

✓ ✓ ? ? Unclear ✓ ✓ ✗ High

10  
11 15. Khamseh et  
12 al. (2011)

✓ ✓ ✓ ? Unclear ✓ ✓ ? Unclear

13  
14  
15 19. Liu et al.  
16 (2011)

✓ ✓ ✓ ✓ Low ✓ ✓ ? Unclear

17  
18  
19 20. Lotrakul et  
20 al. (2008)

✓ ✓ ✓ ✓ Low ? ✓ ✗ High

21  
22  
23 23. Patel et al.  
24 (2008)

✓ ✓ ✓ ? Unclear ? ✓ ✗ High

25  
26  
27 24. Phelan et  
28 al. (2010)

✓ ✓ n/a n/a Low ✓ ✓ ✓ Low

29  
30  
31 25. Rooney et  
32 al. (2013)

✓ ? n/a n/a Unclear ? ✓ ✗ High

33  
34  
35 26. Sherina et  
36 al. (2012)

✓ ✓ ✓ ✓ Low ✓ ✓ ✓ Low

37  
38 27. Sidebottom  
39

✓ ✓ n/a n/a Low ✓ ✓ ✗ High

1  
2  
3  
4  
5  
6  
7  
8  
9  
10  
11  
12  
13  
14  
15  
16  
17  
18  
19  
20  
21  
22  
23  
24  
25  
26  
27  
28  
29  
30  
31  
32  
33  
34  
35  
36  
37  
38  
39  
40  
41  
42  
43  
44  
45  
46  
47  
48  
49

et al. (2012)

|                            |   |   |     |     |         |   |   |   |         |
|----------------------------|---|---|-----|-----|---------|---|---|---|---------|
| 28. Stafford et al. (2007) | ✓ | ✓ | n/a | n/a | Low     | ✓ | ✓ | ✗ | High    |
| 30. Thombs et al. (2008)   | ? | ✓ | n/a | n/a | Unclear | ✓ | ✓ | ✓ | Low     |
| 32. Watnick et al. (2005)  | ✓ | ✓ | n/a | n/a | Low     | ✓ | ✓ | ✓ | Low     |
| 34. Wittkamp et al. (2009) | ✓ | ✓ | n/a | n/a | Low     | ? | ✓ | ✗ | High    |
| 35. Zhang et al. (2013)    | ✓ | ? | ✓   | ✓   | Unclear | ✗ | ✓ | ✗ | High    |
| 36. Zuithoff et al. (2010) | ✓ | ✓ | ?   | ?   | Unclear | ? | ✓ | ✓ | Unclear |

574

575 **Table 5. Pooled estimates of diagnostic properties of the PHQ-9 at cut-off point 10 and using algorithm scoring method in the non-independent vs**  
576 **independent studies groups**

577

| Settings | No of studies | No of patients | Sensitivity (95% CI) | Specificity (95% CI) | Pooled positive likelihood ratio (95% CI) | Pooled negative likelihood ratio (95% CI) | Diagnostic odds ratio (95% CI) | Heterogeneity: I <sup>2</sup> |
|----------|---------------|----------------|----------------------|----------------------|-------------------------------------------|-------------------------------------------|--------------------------------|-------------------------------|
|----------|---------------|----------------|----------------------|----------------------|-------------------------------------------|-------------------------------------------|--------------------------------|-------------------------------|

|                                                     |    |        |                    |                    |                      |                    |                        |       |
|-----------------------------------------------------|----|--------|--------------------|--------------------|----------------------|--------------------|------------------------|-------|
| <b>Manea et al, 2014 SR – RA group</b>              | 7  | 4,065  | 0.77 (0.70 – 0.84) | 0.94 (0.90 – 0.97) | 14.97 (8.39 – 26.71) | 0.23 (0.17 - 0.31) | 64.40 (34.15 – 121.43) | 78.9% |
| <b>Manea et al, 2014 SR Independent studies</b>     | 21 | 9,900  | 0.48 (0.41 – 0.91) | 0.94 (0.91 – 0.95) | 8.26 (6.15 – 11.09)  | 0.54 (0.48 – 0.62) | 15.05 (11.03 – 20.52)  | 68.1% |
| <b>Moriarty et al., 2015 SR – RA group</b>          | 5  | 6,188  | 0.87 (0.77 – 0.93) | 0.87 (0.76 – 0.94) | 7.24 (3.74 – 14.03)  | 0.14 (0.08 - 0.25) | 49.31 (25.74 – 94.48)  | 55.1% |
| <b>Moriarty et al., 2015 SR Independent studies</b> | 26 | 13,164 | 0.76 (0.67 – 0.83) | 0.88 (0.85 – 0.91) | 6.72 (5.06 – 8.92)   | 0.26 (0.19 - 0.37) | 24.96 (14.81 – 42.08)  | 81.5% |

578

579

1  
2  
3  
4  
5  
6  
7  
8  
9  
10  
11  
12  
13  
14  
15  
16  
17  
18  
19  
20  
21  
22  
23  
24  
25  
26  
27  
28  
29  
30  
31  
32  
33  
34  
35  
36  
37  
38  
39  
40  
41  
42  
43  
44  
45  
46  
47  
48  
49  
50  
51  
52  
53  
54  
55  
56  
57  
58  
59  
60

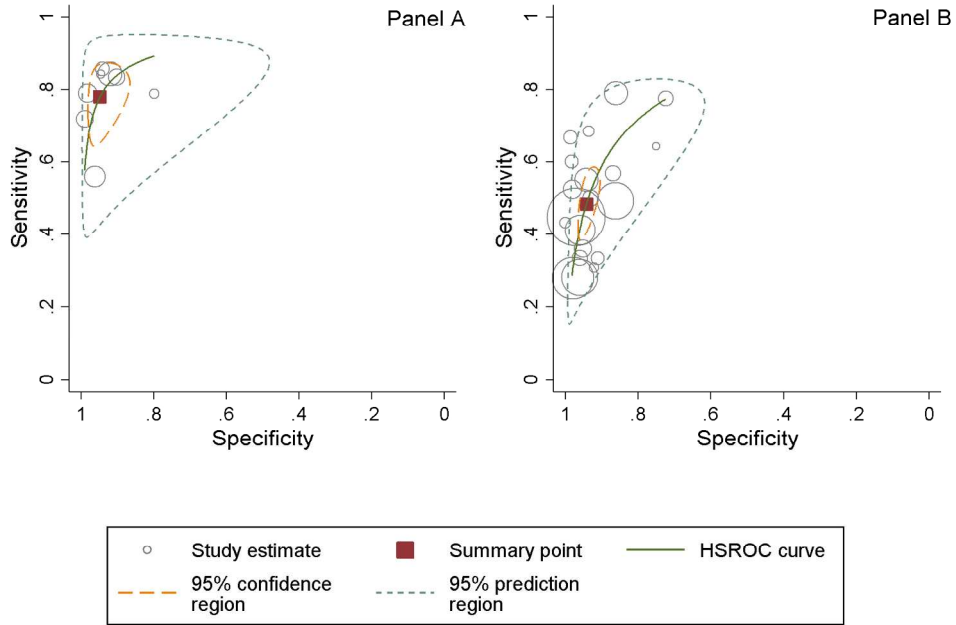

Figure 1. PHQ-9 algorithm scoring method summary ROC plot for the diagnosis of major depressive disorder in allegiant studies (Panel A) and non-allegiant studies (Panel B). Pooled sensitivity and specificity estimates using a bi-variate meta-analysis (HSROC hierarchical receiver-operating characteristic).

169x123mm (300 x 300 DPI)

For peer review only



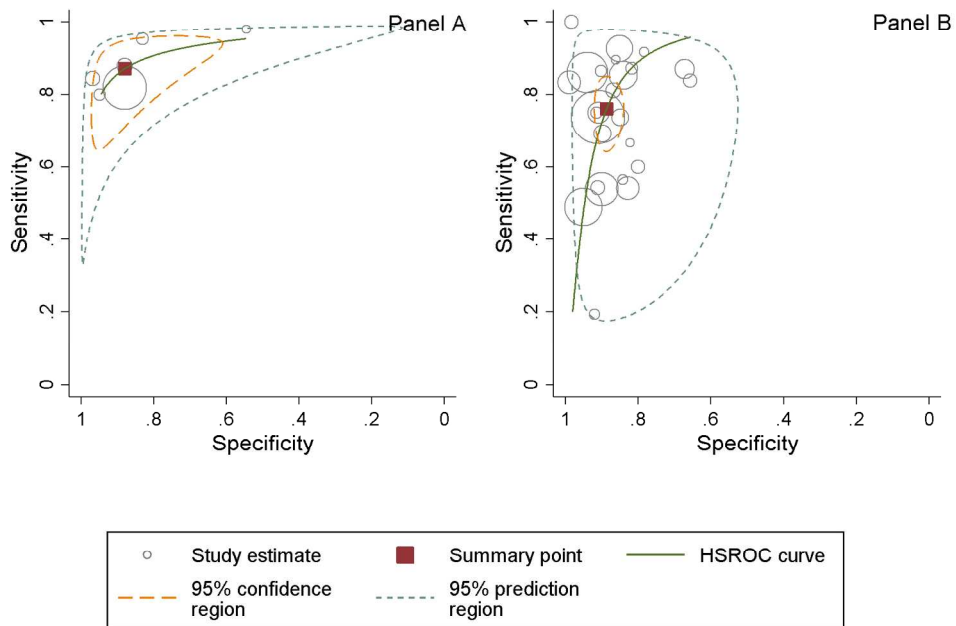

Caption : Figure 2. PHQ-9 summed items scoring method at cut-off point 10 summary ROC plot for diagnosis of major depressive disorder in allegiant studies (panel A) and non-allegiant studies (panel B). Pooled sensitivity and specificity using a bi-variate meta-analysis (HSROC hierarchical receiver-operating characteristic).

169x123mm (300 x 300 DPI)

**Appendices to:** Manea L, Boehnke JR, Gilbody S, Moriarty AS, McMillan D, Are there researcher allegiance effects in diagnostic validation studies of the PHQ-9? A systematic review and meta-analysis. Manuscript submitted for publication at BMJOpen.

### Appendix 1

**Figure 1: PRISMA flowchart - search and selection of included diagnostic accuracy studies for the systematic review of studies reporting diagnostic accuracy of the PHQ-9 at using the summed items scoring method (Manea et al, 2014)**

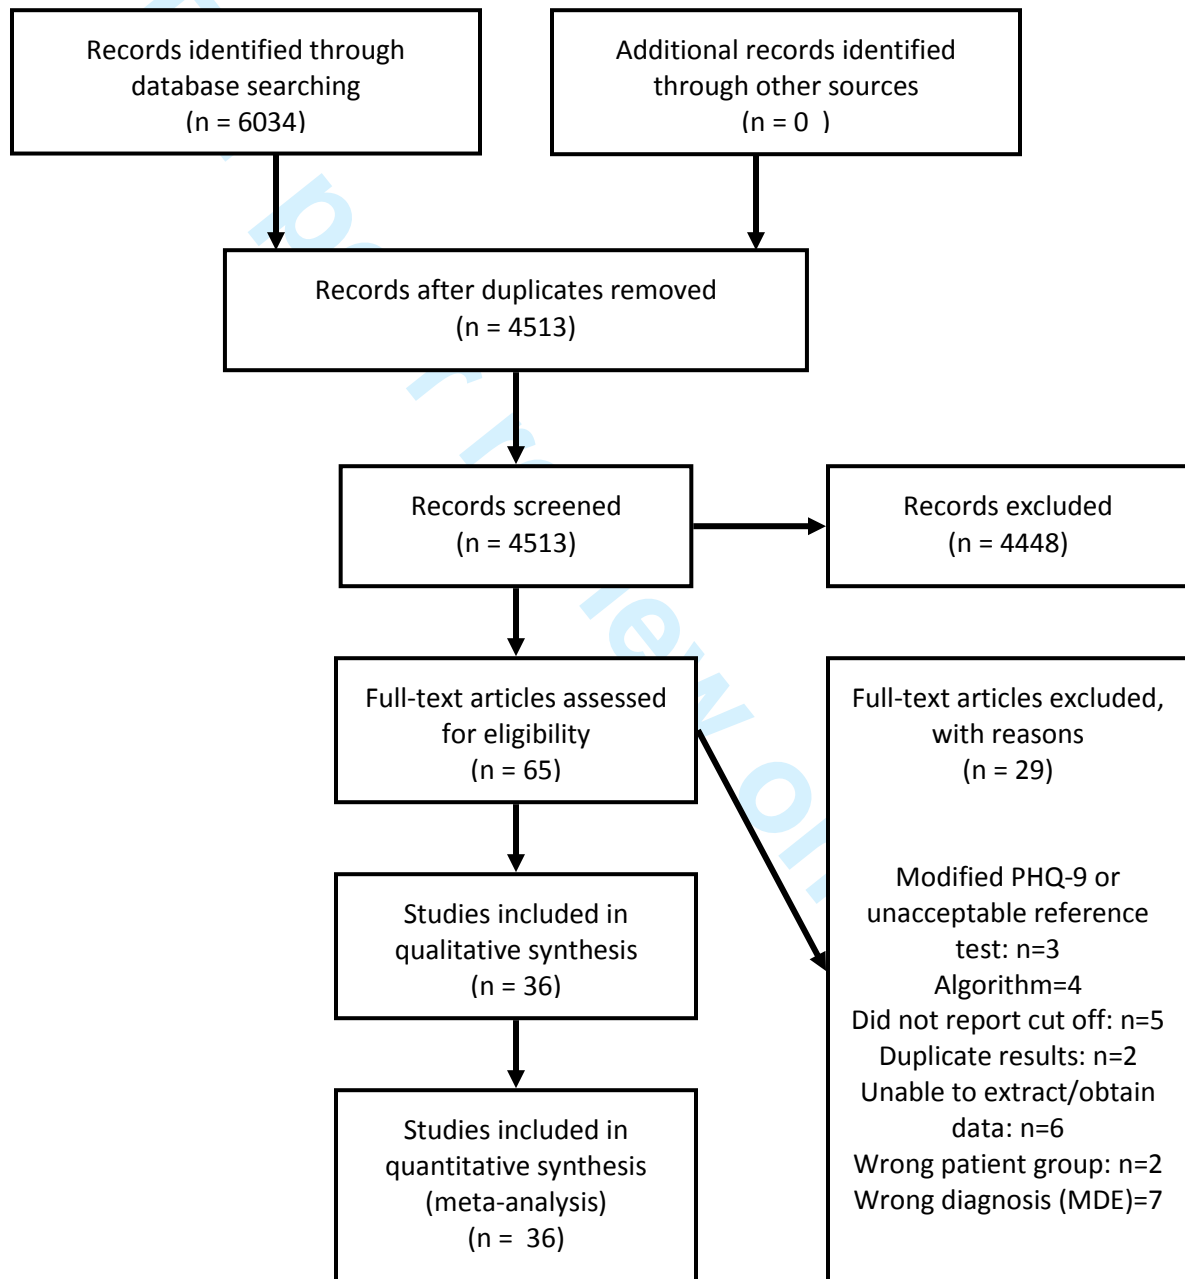

Figure 2: PRISMA flowchart - search and selection of included diagnostic accuracy studies for the systematic review of studies reporting diagnostic accuracy of the PHQ-9 at using the algorithm scoring method (Moriarty et al., 2015)

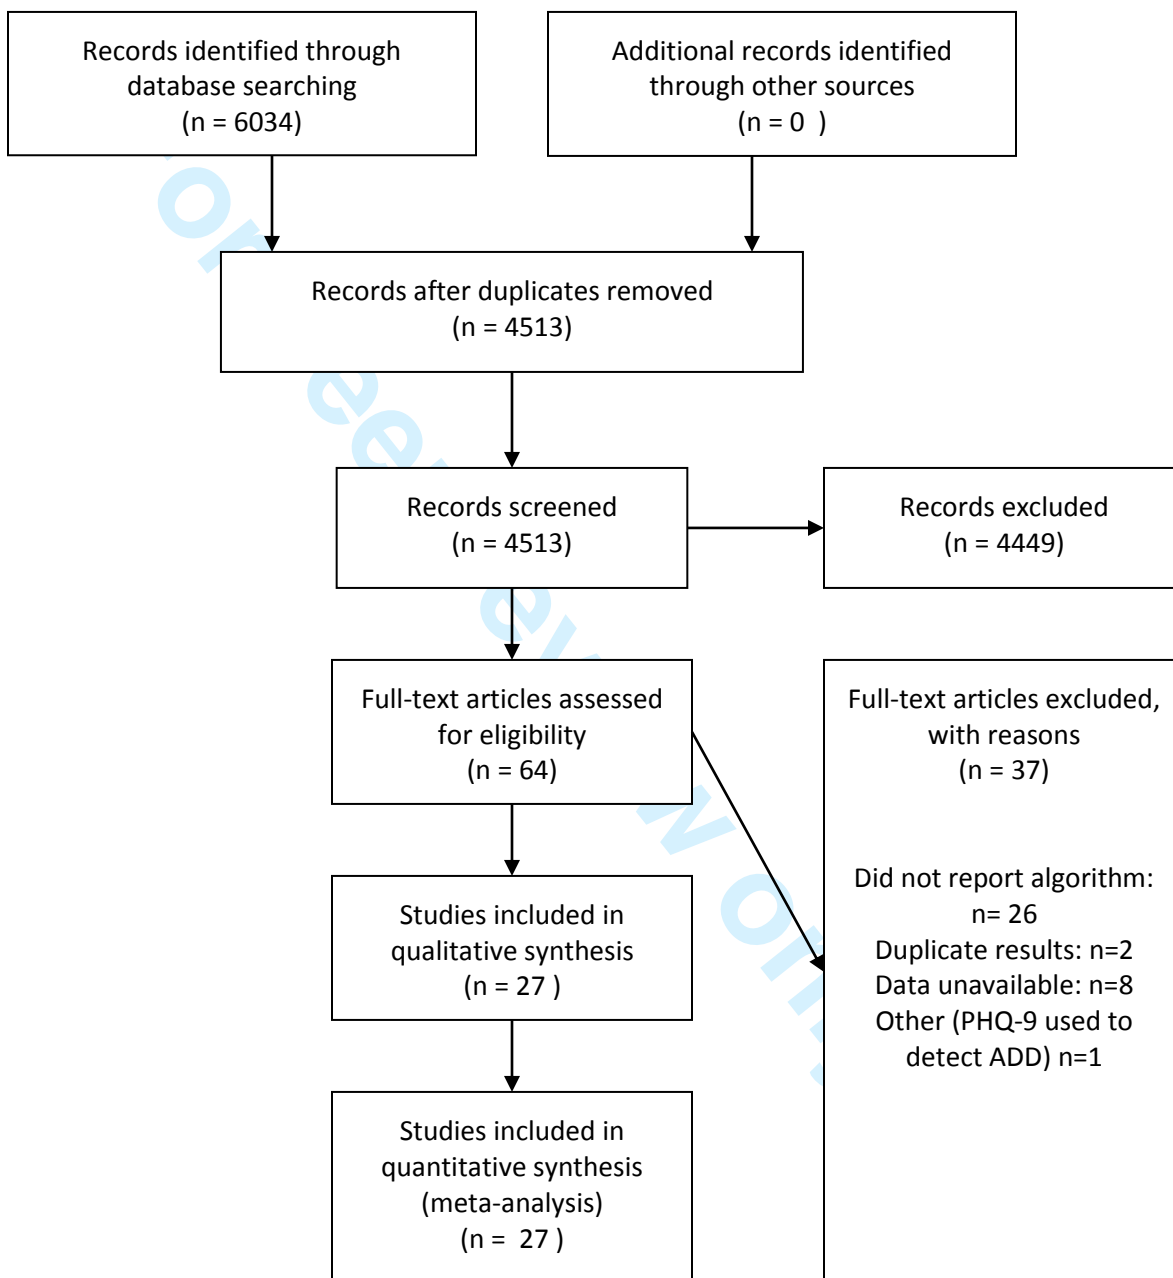

**Appendix 2: Search terms used in Embase, MEDLINE and PsycINFO**

(phq adj5 “9”).ti,ab.  
(phq adj5 item\$).ti,ab.  
(patient health questionnaire adj5 “9”).ti,ab.  
(patient health questionnaire adj5 item\$).ti,ab.  
(prime md adj5 “9”).ti,ab.  
(prime md adj5 item\$).ti,ab.

For peer review only



# PRISMA 2009 Checklist

1  
2  
3  
4  
5  
6  
7  
8  
9  
10  
11  
12  
13  
14  
15  
16  
17  
18  
19  
20  
21  
22  
23  
24  
25  
26  
27  
28  
29  
30  
31  
32  
33  
34  
35  
36  
37  
38  
39  
40  
41  
42  
43  
44  
45  
46  
47  
48  
49

| Section/topic                      | #  | Checklist item                                                                                                                                                                                                                                                                                              | Reported on page #                                               |
|------------------------------------|----|-------------------------------------------------------------------------------------------------------------------------------------------------------------------------------------------------------------------------------------------------------------------------------------------------------------|------------------------------------------------------------------|
| <b>TITLE</b>                       |    |                                                                                                                                                                                                                                                                                                             |                                                                  |
| Title                              | 1  | Identify the report as a systematic review, meta-analysis, or both.                                                                                                                                                                                                                                         | 1                                                                |
| <b>ABSTRACT</b>                    |    |                                                                                                                                                                                                                                                                                                             |                                                                  |
| Structured summary                 | 2  | Provide a structured summary including, as applicable: background; objectives; data sources; study eligibility criteria, participants, and interventions; study appraisal and synthesis methods; results; limitations; conclusions and implications of key findings; systematic review registration number. | 2                                                                |
| <b>INTRODUCTION</b>                |    |                                                                                                                                                                                                                                                                                                             |                                                                  |
| Rationale                          | 3  | Describe the rationale for the review in the context of what is already known.                                                                                                                                                                                                                              | 4-5                                                              |
| Objectives                         | 4  | Provide an explicit statement of questions being addressed with reference to participants, interventions, comparisons, outcomes, and study design (PICOS).                                                                                                                                                  | 5                                                                |
| <b>METHODS</b>                     |    |                                                                                                                                                                                                                                                                                                             |                                                                  |
| Protocol and registration          | 5  | Indicate if a review protocol exists, if and where it can be accessed (e.g., Web address), and, if available, provide registration information including registration number.                                                                                                                               | No                                                               |
| Eligibility criteria               | 6  | Specify study characteristics (e.g., PICOS, length of follow-up) and report characteristics (e.g., years considered, language, publication status) used as criteria for eligibility, giving rationale.                                                                                                      | 5                                                                |
| Information sources                | 7  | Describe all information sources (e.g., databases with dates of coverage, contact with study authors to identify additional studies) in the search and date last searched.                                                                                                                                  | 5                                                                |
| Search                             | 8  | Present full electronic search strategy for at least one database, including any limits used, such that it could be repeated.                                                                                                                                                                               | Available online (see Manea et al., 2015; Moriarty et al., 2015) |
| Study selection                    | 9  | State the process for selecting studies (i.e., screening, eligibility, included in systematic review, and, if applicable, included in the meta-analysis).                                                                                                                                                   | 5                                                                |
| Data collection process            | 10 | Describe method of data extraction from reports (e.g., piloted forms, independently, in duplicate) and any processes for obtaining and confirming data from investigators.                                                                                                                                  | 6                                                                |
| Data items                         | 11 | List and define all variables for which data were sought (e.g., PICOS, funding sources) and any assumptions and simplifications made.                                                                                                                                                                       | 5-6                                                              |
| Risk of bias in individual studies | 12 | Describe methods used for assessing risk of bias of individual studies (including specification of whether this was done at the study or outcome level), and how this information is to be used in any data synthesis.                                                                                      | 6                                                                |

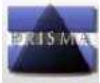

# PRISMA 2009 Checklist

|                      |    |                                                                                                                                                           |   |
|----------------------|----|-----------------------------------------------------------------------------------------------------------------------------------------------------------|---|
| Summary measures     | 13 | State the principal summary measures (e.g., risk ratio, difference in means).                                                                             | 6 |
| Synthesis of results | 14 | Describe the methods of handling data and combining results of studies, if done, including measures of consistency (e.g., $I^2$ ) for each meta-analysis. | 6 |

Page 1 of 2

| Section/topic                 | #  | Checklist item                                                                                                                                                                                           | Reported on page # |
|-------------------------------|----|----------------------------------------------------------------------------------------------------------------------------------------------------------------------------------------------------------|--------------------|
| Risk of bias across studies   | 15 | Specify any assessment of risk of bias that may affect the cumulative evidence (e.g., publication bias, selective reporting within studies).                                                             | 6, 21              |
| Additional analyses           | 16 | Describe methods of additional analyses (e.g., sensitivity or subgroup analyses, meta-regression), if done, indicating which were pre-specified.                                                         | 6                  |
| <b>RESULTS</b>                |    |                                                                                                                                                                                                          |                    |
| Study selection               | 17 | Give numbers of studies screened, assessed for eligibility, and included in the review, with reasons for exclusions at each stage, ideally with a flow diagram.                                          | Appendix           |
| Study characteristics         | 18 | For each study, present characteristics for which data were extracted (e.g., study size, PICOS, follow-up period) and provide the citations.                                                             | Tables 1 and 2     |
| Risk of bias within studies   | 19 | Present data on risk of bias of each study and, if available, any outcome level assessment (see item 12).                                                                                                | Tables 3 and 4     |
| Results of individual studies | 20 | For all outcomes considered (benefits or harms), present, for each study: (a) simple summary data for each intervention group (b) effect estimates and confidence intervals, ideally with a forest plot. | N/A                |
| Synthesis of results          | 21 | Present results of each meta-analysis done, including confidence intervals and measures of consistency.                                                                                                  | Table 5            |
| Risk of bias across studies   | 22 | Present results of any assessment of risk of bias across studies (see Item 15).                                                                                                                          | Tables 3 and 4     |
| Additional analysis           | 23 | Give results of additional analyses, if done (e.g., sensitivity or subgroup analyses, meta-regression [see Item 16]).                                                                                    | 11 and 17          |
| <b>DISCUSSION</b>             |    |                                                                                                                                                                                                          |                    |
| Summary of evidence           | 24 | Summarize the main findings including the strength of evidence for each main outcome; consider their relevance to key groups (e.g., healthcare providers, users, and policy makers).                     | 17-21              |
| Limitations                   | 25 | Discuss limitations at study and outcome level (e.g., risk of bias), and at review-level (e.g., incomplete retrieval of identified research, reporting bias).                                            | 21                 |
| Conclusions                   | 26 | Provide a general interpretation of the results in the context of other evidence, and implications for future research.                                                                                  | 21-22              |
| <b>FUNDING</b>                |    |                                                                                                                                                                                                          |                    |



# PRISMA 2009 Checklist

|   |         |    |                                                                                                                                            |    |
|---|---------|----|--------------------------------------------------------------------------------------------------------------------------------------------|----|
| 4 | Funding | 27 | Describe sources of funding for the systematic review and other support (e.g., supply of data); role of funders for the systematic review. | 23 |
|---|---------|----|--------------------------------------------------------------------------------------------------------------------------------------------|----|

7 *From:* Moher D, Liberati A, Tetzlaff J, Altman DG, The PRISMA Group (2009). Preferred Reporting Items for Systematic Reviews and Meta-Analyses: The PRISMA  
8 Statement. PLoS Med 6(6): e1000097. doi:10.1371/journal.pmed1000097

9 For more information, visit: [www.prisma-statement.org](http://www.prisma-statement.org).

10 Page 2 of 2

For peer review only

# BMJ Open

## Are there researcher allegiance effects in diagnostic validation studies of the PHQ-9? A systematic review and meta-analysis

|                                 |                                                                                                                                                                                                                                                                                                     |
|---------------------------------|-----------------------------------------------------------------------------------------------------------------------------------------------------------------------------------------------------------------------------------------------------------------------------------------------------|
| Journal:                        | <i>BMJ Open</i>                                                                                                                                                                                                                                                                                     |
| Manuscript ID                   | bmjopen-2016-015247.R2                                                                                                                                                                                                                                                                              |
| Article Type:                   | Research                                                                                                                                                                                                                                                                                            |
| Date Submitted by the Author:   | 21-Jul-2017                                                                                                                                                                                                                                                                                         |
| Complete List of Authors:       | Manea, Laura; University of York, Health Sciences<br>Boehnke, Jan Rasmus; University of York<br>Gilbody, Simon; The University of York, Department of Health Sciences<br>Moriarty, Andrew; University of York, Health Sciences<br>McMillan, Dean; University of York, Department of Health Sciences |
| <b>Primary Subject Heading</b>: | Mental health                                                                                                                                                                                                                                                                                       |
| Secondary Subject Heading:      | Diagnostics                                                                                                                                                                                                                                                                                         |
| Keywords:                       | Depression & mood disorders < PSYCHIATRY, Screening, PHQ-9, diagnostic meta-analysis, allegiance effect                                                                                                                                                                                             |
|                                 |                                                                                                                                                                                                                                                                                                     |

SCHOLARONE™  
Manuscripts



1  
2  
3  
4  
5  
6  
7  
8  
9  
10  
11  
12  
13  
14  
15  
16  
17  
18  
19  
20  
21  
22  
23  
24  
25  
26  
27  
28  
29  
30  
31  
32  
33  
34  
35  
36  
37  
38  
39  
40  
41  
42  
43  
44  
45  
46  
47  
48  
49

1 **Are there researcher allegiance effects in diagnostic validation studies of the PHQ-9? A systematic review and meta-analysis**

2

3 Laura Manea MMedSci MRCPsych\*, Jan R. Boehnke PhD, Simon Gilbody DPhil FRCPsych FRSA, Andrew S. Moriarty MRes, Dean  
4 McMillan PhD

5

6 \*Corresponding Author

7 Hull York Medical School and Department of Health Sciences, ARRC Building, University of York, YO10 5DD

8 Email: [laura.manea@york.ac.uk](mailto:laura.manea@york.ac.uk)

9

10

11

12

13

14

15

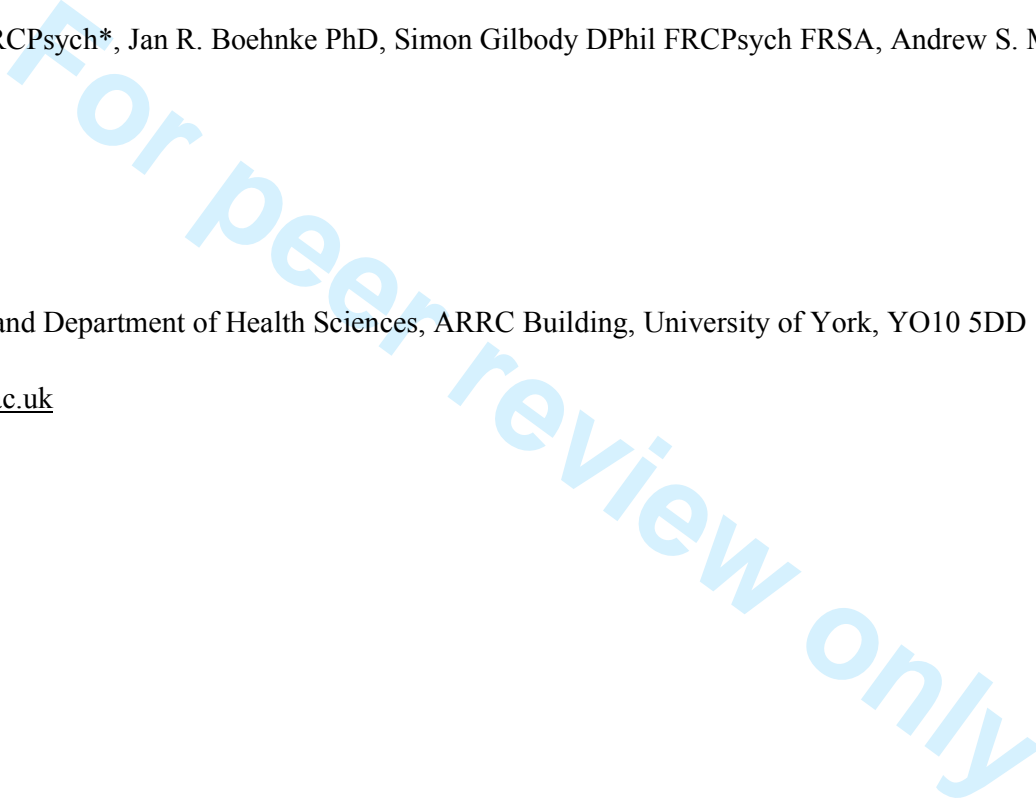

1  
2  
3  
4  
5 166  
7 178  
9 1810  
11 1912  
13 2014  
15 2116  
17 2218  
19 23 **Abstract**

20 24 **Objectives** To investigate whether an authorship effect is found that leads to better performance in studies conducted by the original developers  
21 25 of the PHQ-9 (allegiant studies).

22 26 **Design** Systematic review with random effects bivariate diagnostic meta-analysis. Search strategies included electronic databases, examination  
23 27 of reference lists, and forward citation searches.

24 28 **Inclusion criteria** Included studies provided sufficient data to calculate the diagnostic accuracy of the PHQ-9 against a gold standard diagnosis  
25 29 of major depression using the algorithm or the summed item scoring method at cut-off point 10.

26 30 **Data extraction** Descriptive information, methodological quality criteria, and 2×2 contingency tables.

27 31 **Results**

1  
2  
3  
4  
5 32 Seven allegiant and twenty independent studies reported the diagnostic performance of the PHQ-9 using the algorithm scoring method. Pooled  
6  
7 33 diagnostic odds ratio (DOR) for the allegiant group was 64.40, and 15.05 for non-allegiant studies group. The allegiance status was a significant  
8  
9 34 predictor of DOR variation ( $p < 0.0001$ ).

10  
11 35 Five allegiant studies and twenty-six non-allegiant studies reported the performance of the PHQ-9 at recommended cut-off point of 10. Pooled  
12  
13 36 DOR for the allegiant group was 49.31, and 24.96 for the non-allegiant studies. The allegiance status was a significant predictor of DOR  
14  
15 37 variation ( $P = 0.015$ ).

16  
17 38 Some potential alternative explanations for the observed authorship effect including differences in study characteristics and quality were found,  
18  
19 39 though it is not clear how some of them account for the observed differences

20  
21 40

## 22 23 41 **Conclusions**

24  
25  
26 42 Allegiant studies reported better performance of the PHQ-9. Allegiance status was predictive of variation in the DOR. Based on the observed  
27  
28 43 differences between independent and non-independent studies we were unable to conclude or exclude that allegiance effects are present in  
29  
30 44 studies examining the diagnostic performance of the PHQ-9. This study highlights the need for future meta-analyses of diagnostic validation  
31  
32 45 studies of psychological measures to evaluate the impact of researcher allegiance in the primary studies.

33  
34 46

35  
36 47

## 37 38 48 **Strengths and limitations of this study**

39  
40 49

- 1  
2  
3  
4  
5 50 a) An original study—the first meta-analysis of diagnostic validation studies of psychological measures to evaluate the impact of researcher  
6 allegiance.  
7 51  
8 52 b) Using rigorous methodology—strict inclusion/exclusion and quality assessment criteria.  
9  
10 53 c) We found that the allegiance effect was a significant predictor of the variation of the diagnostic odds ratio in the meta-regression  
11 analysis.  
12 54  
13 55 d) Substantial variability observed in methodological quality of included studies.  
14  
15 56 e) Based on the observed methodological differences between the independent and non-independent studies we were unable to conclude or  
16 exclude that allegiance effects are present in studies examining the diagnostic performance of the PHQ-9.  
17 57  
18 58  
19  
20  
21 59  
22  
23 60  
24  
25  
26 61  
27  
28 62  
29  
30  
31 63  
32  
33 64  
34  
35  
36 65  
37  
38 66  
39  
40  
41  
42  
43  
44  
45  
46  
47  
48  
49

1  
2  
3  
4  
5 67 Research on allegiance effects has a long tradition in psychotherapy research. In this context *allegiance* describes the phenomenon that  
6  
7 68 researchers and clinicians who developed a treatment approach or are for other reasons invested in it tend to find larger effect sizes in favour of  
8  
9 69 their treatment than for comparison groups. [1] This finding has been extensively replicated [2], [3] and is also robust when the quality of  
10  
11 70 research is controlled for. Researcher allegiance is subject of on-going debates about the design of efficacy studies as well as implications for  
12  
13 71 policy. [2], [4], [5] Researcher allegiance is also discussed widely in the literature on experimental as well as evaluation research. [6] Since the  
14  
15 72 motivational underpinnings of allegiance effects are potentially far more ingrained into human behaviour and decision making than previously  
16  
17 73 thought (e.g., [7], they may occur commonly in clinical research in general.

18 74 Although it has been suggested that allegiance effects may play a role in the validation of psychological screening and case-finding tools (e.g.,  
19  
20 75 O'Shea et al., in press), systematic evaluations of this hypothesis are rare and studies that acknowledge potential allegiance effects in such  
21  
22 76 studies mainly come from forensic psychology and psychiatry backgrounds. [8]–[11] Diagnostic validation studies are geared at establishing the  
23  
24 77 sensitivity and specificity of a screening or case finding tool, which is used in practice to differentiate cases from non-cases or to decide about  
25  
26 78 whether further assessment or treatment is indicated or will be offered. An allegiance effect in such studies would be seen in systematically  
27  
28 79 higher sensitivities or specificities if the original author(s) is (are) part of the team of such a study. Such a bias would have a deleterious affect on  
29  
30 80 practice through promising over-optimistic accuracy of the screening or case finding tool or in evaluating the cost-effectiveness of the measure  
31  
32 81 in a screening or case-finding context.

33 82 The depression module of the Patient Health Questionnaire (PHQ-9) is a widely used depression-screening instrument in non-psychiatric  
34  
35 83 settings. The PHQ-9 was developed by a team of researchers, with its development underwritten by an educational grant from Pfizer US  
36  
37 84 Pharmaceuticals. [12] The PHQ-9 can be scored using different methods, including an algorithm based on DSM-IV criteria and a cut-off based  
38  
39 85 on summed-item scores. The psychometric properties of these two approaches have been summarised in two recently published meta-analyses.  
40  
41 86 [13], [14] The goal of the current review is to investigate, based on an established database of PHQ-9 diagnostic validation studies [13], [14],  
42  
43  
44  
45  
46  
47  
48  
49

1  
2  
3  
4  
5 87 whether an allegiance effect is found that leads to an increased sensitivity and specificity in studies that were conducted by researchers closely  
6  
7 88 connected to the original developers of the instrument.

8  
9 89 METHODS

10  
11 90 *Study Selection*

12  
13  
14 91 Similar search strategies were used in both systematic reviews. (For full details please see Manea et al. (2014) and Moriarty et al. (2015)).  
15  
16 92 Embase, MEDLine and PSYCHInfo were searched from 1999 (when the PHQ-9 was first developed) to August 2013 [13] and September 2013  
17  
18 93 [14] respectively, using the terms “PHQ-9”, “PHQ”, “PHQ\$” and “patient health questionnaire”. The search strategy is presented in Appendix 1.  
19  
20 94 The reference lists of studies fitting the inclusion criteria were manually searched and a reverse citation search in Web of Science was  
21  
22 95 performed. Authors of unpublished studies were contacted and conference abstracts were reviewed in an attempt to minimise publication bias.

23  
24 96 The following inclusion-exclusion criteria were used:

25  
26 97 *Population:* Adult population. *Instrument:* Studies that used the PHQ-9. *Comparison (reference standard):* The accuracy of the PHQ-9 had to be  
27  
28 98 assessed against a recognised gold-standard instrument for the diagnosis of either Diagnostic and Statistical Manual (DSM) or International  
29  
30 99 Classification of Disease (ICD) criteria for major depression. Studies were included if the diagnoses were made using a standardised diagnostic  
31  
32 100 structured interview schedule (e.g. Mini International Neuropsychiatric Interview (MINI), Structured Clinical Interview for DSM Disorders  
33  
34 101 (SCID)). Unguided clinician diagnoses with no reference to a standard structured diagnostic schedule or comparisons of the PHQ-9 with other  
35  
36 102 self-report measures were excluded. Studies were also excluded if the target diagnosis was not major depressive disorder (MDD, e.g. any  
37  
38 103 depressive disorder). *Outcome:* Studies had to report sufficient information to calculate a 2\*2 contingency table for the algorithm or the  
39  
40 104 recommended cut-off point 10. *Study design:* Any design. *Additional criterion:* We avoided double counting of evidence by ensuring that only

1  
2  
3  
4  
5 105 one study of those that reported overlapping datasets in different journals were included in the meta-analysis. Citations with overlapping samples  
6 106 were examined to establish whether they contained information relevant to the research question that was not contained in the included report.

7  
8  
9 107 *Quality assessment*

10  
11 108 Quality assessment was performed using the QUADAS-2 tool, a tool for evaluating the risk of bias and applicability of primary diagnostic  
12 109 accuracy studies when conducting diagnostic systematic reviews. [15] It covers the areas of: patient selection, index test, reference standard and  
13 110 flow and timing. [16] This tool was adapted for the two reviews and quality assessments were carried out by two independent reviewers for all  
14 111 studies included in the reviews.

15  
16  
17  
18  
19 112 *Data synthesis and statistical analysis*

20  
21 113 We constructed 2x2 tables for cut-off point 10 [14] and the algorithm scoring method [13] Pooled estimates of sensitivity, specificity,  
22 114 positive/negative likelihood ratios, and diagnostic odds ratios were calculated using random effects bivariate meta-analysis. [17] Heterogeneity  
23 115 was assessed using  $I^2$  for the diagnostic odds ratio, an estimate of the proportion of study variability that is due to between-study variability  
24 116 rather than sampling error. We considered values of  $\geq 50\%$  to indicate substantial heterogeneity.[18] Summary Receiver Operator Characteristic  
25 117 curves (sROC) were constructed using the bivariate model to produce a 95% confidence ellipse within ROC space. [19] Each data point in the  
26 118 summary ROC space represents a separate study, unlike a traditional ROC plot, which explores the effect varying thresholds on sensitivity and  
27 119 specificity in a single study.

28  
29  
30 120 We undertook a meta-regression analysis of logit diagnostic odds ratio using research allegiance as covariate in the meta-regression model. [20],  
31 121 [21] Analyses were conducted using STATA version 12, with the metan, metandi and metareg user-written commands.

32  
33  
34  
35  
36  
37  
38 122 *Allegiance Rating*

1  
2  
3  
4  
5 123 We rated authorship on a paper if any of the developers of the PHQ-9 - Kurt Kroenke, MD, Robert L Spitzer, MD, and Janet B W Williams – as  
6 124 an indicator of potential allegiance. We also rated as evidence of allegiance as acknowledged collaborations with the developers of the PHQ-9,  
7 125 even if they were not listed as co-authors or if the authors acknowledged funding from Pfizer to conduct the study.  
8  
9  
10

11 126

## 12 127 RESULTS

13 128

### 14 129 **Overview of included studies**

15  
16 130 31 studies reported the diagnostic properties of the PHQ-9 at cut-off point 10 or above and were included in this analysis. [14] 27 studies were  
17 131 included in the algorithm review [13]. The study selection flowcharts can be found in Appendix 2 (figures 1 and 2). The characteristics of these  
18 132 studies are reported in tables 1 and 2 and the results of the methodological assessment are presented in tables 3 and 4.  
19  
20

### 21 133 **Algorithm scoring method**

22 134

#### 23 135 Descriptive characteristics

24 136 The descriptive characteristics of the included studies are presented in table 1. Seven individual studies that reported the diagnostic performance  
25 137 of the PHQ-9 using the algorithm scoring method were co-authored by the original developers of the PHQ-9 [22]–[26], specifically  
26 138 acknowledged one of the developers and support by an educational grant from Pfizer US [27], or were co-authored by the first author of a  
27  
28  
29  
30  
31  
32  
33  
34  
35  
36  
37  
38  
39  
40  
41  
42  
43  
44  
45



1  
2  
3  
4  
5 139 previous study that had also been co-authored by one of the developers [28]. Twenty non-allegiant studies reported the diagnostic properties of  
6  
7 140 the PHQ-9 using the algorithm scoring method.

8  
9 141

10  
11 142 Three (43%, 3/7) of the allegiant studies were conducted exclusively in hospital settings [22], [26], [28]. The remaining four studies (67%, 4/7)  
12  
13 143 were conducted in different settings or non-exclusively hospital settings: one in primary care [25] and three in mixed settings: psycho-somatic  
14  
15 144 walk in clinics and family practices [23]<sup>1</sup>, outpatient clinics and family practices [24] and primary care and hospital settings [27]. In the non-  
16  
17 145 allegiant group, thirteen (65%, 13/20) studies were conducted in hospital settings [29]–[41]. Of the remaining seven studies, six were conducted  
18  
19 146 in primary care settings [42]–[47] and one in a community sample [48].

20  
21 147 In both groups (non-allegiant and allegiant studies), the majority of studies validated a translated version of the PHQ-9. Two of the studies  
22  
23 148 authored by developers (28%, 2/7) [25], [26], and eight (40%, 8/20) allegiant studies [29], [30], [37]–[40], [42], [48] were conducted in English.

24  
25 149 The mean prevalence of major depressive disorder in the group of allegiant studies was 13.4 % (range 6.1% - 29.2%); in the non-allegiant group  
26  
27 150 it was 15.5% (range 3.9% - 32.4%). The mean age of patients in the PHQ-9 developers group was 45.7; all but one study had a mean age in the  
28  
29 151 range of 40 to 50 years. In the non-allegiant group the mean age was 54.6 (range 29.3 – 75.0), with almost half (8) of the studies reporting a  
30  
31 152 mean age of over 60. The percentage of females in the PHQ-9 developers was 56.8% (range 28.6% - 67.8%) and in the non-allegiant group was  
32  
33 153 59.1 (18% -100%).

34 154  
35  
36  
37  
38

---

39  
40  
41  
42  
43  
44  
45  
46  
47  
48  
49  
<sup>1</sup> This study provided separate estimates for the two settings in which it was conducted; therefore separate psychometric estimates were generated for each sample for both algorithm scoring method and summed items scoring method at cut-off point 10 (see below).

1  
2  
3  
4  
5 155 All allegiant studies used a self-reported PHQ-9, whereas in 7 non-allegiant studies (30%, 6/20) the PHQ-9 was administered by a researcher  
6  
7 156 [30]–[33], [43], [48]. Apart from Muramatsu et al. (2007) all allegiant studies used the SCID as a gold standard; the non-allegiant studies used a  
8  
9 157 wider range of gold standards including SCAN, CIDI, MINI, and C-DIS, though the SCID was also frequently used by the independent studies  
10  
11 158 as well (45%, 9/20 studies).

12  
13 159 Four out of the seven allegiant studies (57%) did not include a conflict of interests statement [22], [23], [25], [27]. Also, four (57%) of the  
14  
15 160 allegiant studies acknowledged funding from Pfizer [23]–[25], [27]. Only one study [27] acknowledged the collaboration with one of the  
16  
17 161 developers of the PHQ-9.

18  
19 162 Of the non-allegiant studies, twelve (60%) did not include a conflict of interests statement [29]–[32], [35]–[37], [39], [44]–[46], [48]. It appears  
20  
21 163 that newer studies were more likely to include a conflict of interest statement, which may reflect a recent change in reporting. Funding was  
22  
23 164 acknowledged by most studies (18/20) and most received funding from academic or/and health research institutions. Two studies received  
24  
25 165 funding from pharmaceutical companies – Lundbeck [43] and Pfizer [35] and one study acknowledged that Pfizer Italia provided the Italian  
26  
27 166 version of PHQ-9 and gave the authors permission to use it [36].

28 167 Diagnostic test accuracy

29  
30 168 Pooled sensitivity and specificity was calculated separately for the non-allegiant and allegiant studies. Pooled sensitivity for the allegiant studies  
31  
32 169 of the PHQ-9 was 0.77 (95% CI = 0.70 – 0.84), pooled specificity was 0.94 (95% CI = 0.90 – 0.97), and the pooled diagnostic odds ratio was  
33  
34 170 64.40 (95% CI = 34.15 – 121.43). Heterogeneity was high ( $I^2 = 78.9\%$ ). Figure 1 represents the summary ROCs for this set of studies.  
35

36 171

37  
38 172  
39  
40  
41  
42  
43  
44  
45

1  
2  
3  
4  
5 173 -----  
6  
7  
8 174 Figure 1. PHQ-9 algorithm scoring method summary ROC plot for the diagnosis of major depressive disorder in allegiant studies (Panel A) and  
9 175 non-allegiant studies (Panel B). Pooled sensitivity and specificity estimates using a bi-variate meta-analysis (*HSROC* hierarchical receiver-  
10 176 operating characteristic).  
11  
12  
13 177 -----  
14

15  
16 178  
17  
18 179  
19  
20 180 Pooled sensitivity for the non-allegiant studies was lower compared to the developer authored studies group at 0.48 (95% CI = 0.41 – 0.91),  
21 181 pooled specificity was the same at 0.94 (95% CI = 0.91 – 0.95). The pooled diagnostic odds ratio was approximately four times lower at 15.05  
22 182 (95% CI = 11.03 – 20.52) (see figure 1). Heterogeneity was substantial at  $I^2 = 68.1\%$ .  
23  
24  
25

26 183

27  
28 184

29  
30  
31 185 The meta-regression analysis for algorithm studies with non-allegiant status as the predictor of the diagnostic odds ratio showed that non-  
32 186 allegiant status was a significant predictor of the diagnostic odds ratio ( $p < 0.0001$ ) and explained a substantial amount of the observed  
33 187 heterogeneity (51.5%).  
34  
35

36  
37 188

38  
39 189 Quality assessment  
40  
41  
42  
43  
44  
45

1  
2  
3  
4  
5 190 The results of the quality assessment using QUADAS-2 are given in table 3 for the studies reporting on the diagnostic performance of the  
6  
7 191 algorithm scoring method. In the patient selection domain, more non-allegiant studies (65%, 13/20) than allegiant (29%, 2/7) met the criterion  
8  
9 192 for consecutive referrals. There were no marked differences on the other two criteria in this domain (avoid case-control design, avoid  
10 193 inappropriate exclusions). In the index test domain, the proportion of studies reporting that the PHQ-9 was conducted blind to the reference test  
11 194 was comparable between the two groups. There were differences in this domain for those studies using a translated version of the test. All non-  
12 195 English allegiant studies (5/5) used an appropriately translated version of the PHQ-9; whereas just over a half of the non-allegiant studies  
13 196 reported this (55%, 6/11). However, the majority of both sets of studies did not report details of psychometric properties of the translated  
14 197 version. For the reference test domain, nearly all studies in both groups were rated as using a reference test that would correctly classify the  
15 198 condition. While most allegiant studies reported that the reference test was interpreted blind to the PHQ-9 score (86%, 6/7), this was reported in  
16 199 only 60% (12/20) of the non-allegiant studies.

17  
18  
19  
20  
21  
22 200 The two sets of studies that used translated versions of the reference test were broadly comparable. There was a slight indication that the  
23 201 allegiant studies were more likely to use an appropriately translated version of the reference test and report data on the psychometric properties  
24 202 of the translated version, though the numbers for the translated comparison are very low. There were, however, some more notable differences  
25 203 on the flow and timing domain. Most allegiant studies ensured that the time between the index and reference test was under two weeks (86%,  
26 204 6/7) in comparison to 70% (14/20) of the non-allegiant studies. More allegiant studies met the criterion for 'all participants included in the  
27 205 analysis' (57%, 4/7) than non-allegiant studies (25%).

28  
29  
30  
31  
32  
33 206

34  
35  
36 207 **Summed items scoring method (cut-off point 10 or above)**

37  
38 208  
39  
40  
41  
42  
43  
44  
45

1  
2  
3  
4  
5 209 Descriptive characteristics  
6

7  
8 210 Table 2 presents the sample characteristics of the thirty-one PHQ-9 validation studies that reported the psychometric properties of the PHQ-9 at  
9 211 cut-off point 10 or above. Five of these studies were co-authored by the original developers of the instrument or acknowledged collaboration  
10 212 [12], [23], [26], [49] or were co-authored by the first author of a previous study that had also been co-authored by one of the developers [28].  
11 213 Twenty-six studies were conducted by independent researchers.  
12  
13  
14

15 214

16  
17 215 Three (60%, 3/5) allegiant studies [26], [28], [49] and eleven non-allegiant studies (42%, 11/26) [30]–[32], [34], [37], [38], [50]–[54] were  
18 216 conducted in hospital settings.  
19  
20

21 217

22  
23  
24 218 Three (60%, 3/5) allegiant studies [12], [26], [49] and thirteen non-allegiant studies (13/26) [30], [37], [38], [42], [48], [51]–[53], [55]–[59], were  
25 219 conducted in English.  
26  
27

28 220

29  
30  
31 221 The mean prevalence of major depressive disorder in the allegiant group was 13.2% (range 6.1% - 33.5%) and in the non-allegiant group was  
32 222 16.1% (range 2.5% - 43.2%). The mean age of patients in the allegiant group studies was 48.1 (range 41.9 -61.0) and in the 26 non-allegiant  
33 223 studies that reported these data was 49.1 (range 23.0 – 78.0). The percentage of females in the allegiant studies that reported these data [12],  
34 224 [23], [26], [28] was 56.3% (range 28.6% – 67.8%) and in the non-allegiant group was 64.9 % (range 12% -100%).  
35  
36  
37

38 225  
39  
40  
41  
42  
43  
44  
45

1  
2  
3  
4  
5 226 Three allegiant studies used the self-reported mode of administration and two of them did not specify how the PHQ-9 was administered. In 9  
6  
7 227 non-allegiant studies (34%, 9/26) the PHQ-9 was administered by the researcher [30]–[32], [48], [56], [58]–[61]. All allegiant studies used SCID  
8  
9 228 as a gold standard; the non-allegiant studies used a wider range of gold standards including SCAN, CIDI, MINI, CIS-R, C-DIS, though the SCID  
10 229 was used in half of the studies (50%, 13/26 studies).

11  
12 230 Three allegiant studies (60%) did not include a conflict of interests statement [12], [23], [49]. Two of these studies [12], [23] acknowledged  
13 231 funding from Pfizer. None of the allegiant studies acknowledged collaboration or authorship of one of the developers of the PHQ-9.

14  
15  
16  
17 232 Of the non-allegiant studies, thirteen (42%) did not include a conflict of interests statement [30]–[32], [37], [42], [46], [48], [53], [55], [60],  
18 233 [62]–[64]. Similar to the algorithm studies, the newer studies were more likely to include a conflict of interest statement. Funding was  
19 234 acknowledged by most studies (27/31) and most received funding from academic or/and health research institutions. One study [57]  
20 235 acknowledged that the last author involved in the development of one of the instruments (CORE-OM), ‘but does not gain financially from its  
21 236 use’. One study [51] acknowledged funding from industry, AHA Pharmaceuticals Roundtable, but stated that ‘the funding organisations had no  
22 237 role in the design or conduct of the study, collection, management, analysis or interpretation of data; or preparation, review or approval of the  
23 238 manuscript. Fine et al., 2013 disclosed that the last author had financial and consulting interests (Pfizer was not cited as one of them).

24  
25  
26  
27  
28  
29  
30 240 *Diagnostic test accuracy*

31  
32 241 Pooled sensitivity of allegiant studies was 0.87 (95% CI = 0.77 – 0.93), pooled specificity was 0.87 (95% CI = 0.76 – 0.94), and the pooled  
33 242 diagnostic odds ratio was 49.31 (95% CI = 25.74 – 94.48) – see table 5. Heterogeneity was moderate ( $I^2 = 55.1\%$ ). Figure 2 represents the  
34 243 summary ROCs for this group.

35  
36  
37  
38 244

39  
40 245

1  
2  
3  
4  
5 246

6 -----  
7 247 Figure 2. PHQ-9 summed items scoring method at cut-off point 10 summary ROC plot for diagnosis of major depressive disorder in allegiant  
8 248 studies (panel A) and non-allegiant studies (panel B). Pooled sensitivity and specificity using a bi-variate meta-analysis (*HSROC* hierarchical  
9 249 receiver-operating characteristic).  
10 -----

11 250

12 -----  
13  
14 251 Pooled sensitivity of non-allegiant studies was 0.76 (95% CI, 0.67 – 0.83), pooled specificity was 0.88 95% CI (0.85 – 0.91), and the pooled  
15 252 diagnostic odds ratio was 24.96 (95% CI 14.81 – 42.08), approximately half that of the allegiant studies (table 2). Heterogeneity was high at  $I^2 =$   
16  
17 253 81.5 %. Figure 2 represents the summary ROCs for this group.  
18  
19

20 254  
21  
22  
23  
24  
25  
26  
27  
28  
29  
30  
31  
32  
33  
34  
35  
36  
37  
38  
39  
40  
41  
42  
43  
44  
45

1  
2  
3  
4  
5 255 The meta-regression for the studies using a cut-off point of 10 or above with allegiance status of the predictor showed that allegiance status was  
6 256 a significant predictor of the diagnostic odds ratio ( $P = 0.015$ ) and explained 19.0% of observed heterogeneity.

7  
8  
9 257

10  
11 258 *Quality assessment*

12  
13  
14 259 The results of the quality assessment using the QUADAS-2 are given in table 4. For the patient selection domain, the two groups of studies were  
15 260 broadly comparable on two items (consecutive or random sample, avoid case-control design). However, all allegiant studies were rated as  
16 261 avoiding inappropriate exclusions (5/5) in contrast to 58% (15/26) of the non-allegiant studies.

17  
18  
19  
20 262

21  
22 263 On the index test domain, there were a number of differences between the two groups of studies. More of the non-allegiant studies (81%, 21/26)  
23 264 reported that the PHQ-9 was interpreted blind to the reference test compared to 60% (3/5) of the allegiant studies. All (5/5) allegiant studies were  
24 265 rated as pre-specifying the threshold on the PHQ-9 compared to 73% (19/26) of the non-allegiant studies. The two sets of studies were broadly  
25 266 comparable in terms of two items from the reference test domain (correctly classify target condition, reference test interpreted blind). Only one  
26 267 allegiant study used a translated version of the index test or reference test, so it is not possible to comment on differences between the two sets of  
27 268 studies in terms of these items from the index or reference test domains. For the flow and timing domain, the two groups of studies were broadly  
28 269 comparable for two of the criteria (interval of two weeks or less, all participants receive same reference test). However, fewer than half of the  
29 270 non-allegiant studies met the criterion for 'all participants included in the analysis' (42%, 11/26); whereas all allegiant studies met this criterion.

30  
31  
32  
33  
34  
35  
36 271

37  
38  
39 272 **Discussion**



1  
2  
3  
4  
5 273 This is to our knowledge the first systematic examination of a possible ‘allegiance’ or authorship effect in the validation of screening or case  
6  
7 274 finding psychological instrument for a common mental health disorder. We reviewed diagnostic validation studies of the PHQ-9, a widely used  
8  
9 275 depression screening-instrument. We found that allegiant studies reported higher sensitivity paired with similar specificity compared to non-  
10  
11 276 allegiant studies. When entered as a covariate in meta-regression analyses, allegiance status was predictive of variation in the DOR for both the  
12  
13 277 algorithm scoring method and the summed-item scoring method at a cut-off point of 10 or above.  
14  
15 278

16  
17 279 Previous research has proposed several possible explanations for the allegiance effect [9]–[11]. One possibility is the advertent bias that may  
18  
19 280 serve to inflate the performance of a test when evaluated by those who have developed it. However, before concluding that the differences are  
20  
21 281 due to this, it is important to explore and rule out alternative explanations. First, it is possible that any observed differences are a result of  
22  
23 282 differences in study characteristics of the two sets of studies (e.g., setting, clinical population). Secondly, differences in the methodological  
24  
25 283 quality of the studies may also account for any differences. These possibilities are examined below.  
26  
27 284

#### 28 285 Difference in study characteristics as potential alternative explanations

29  
30  
31 286 The two sets of studies were broadly comparable in terms of gender and the prevalence of depression, so these variables are unlikely to offer an  
32  
33 287 explanation for the differences. While there were some indications from both sets of comparisons that the PHQ-9 may have been researcher-  
34  
35 288 administered more often in the independent studies, it is not immediately clear how this would lead to lowered diagnostic performance.  
36  
37 289

1  
2  
3  
4  
5 290 The diagnostic meta-analyses of the PHQ-9 [13], [14] have shown that the sensitivity and DOR of the PHQ-9 tends to be lower in hospital  
6  
7 291 settings for both algorithm and summed-item scoring methods. Whilst the fact that proportionally more non-allegiant algorithm studies were  
8  
9 292 conducted in secondary care could explain the lower sensitivity and DOR values in the algorithm studies, in the studies that reported the cut-off  
10  
11 293 point of or above this would not be the case as proportionally more allegiant studies were conducted in hospital settings.

12  
13 294 Similarly, differences in the proportions of studies using translated versions of the PHQ-9 are also unlikely to offer an obvious explanation of the  
14  
15 295 difference in diagnostic performance, because in the algorithm set of studies more of the allegiant studies used a translated version of the test,  
16  
17 296 but the proportions were in the opposite direction for the studies using a cut off of 10 or above. We tested this by carrying out a sensitivity  
18  
19 297 analysis restricting the sample to English studies and studies with adequate translation. The allegiance effect was still predictive of DOR  
20  
21 298 variation between allegiance and non-allegiance studies variation in both algorithm ( $p = 0.00$ ) and summed item scoring at cut-off point of 10  
22  
23 299 meta-analyses ( $p = 0.02$ ).

24  
25 300 A similar conclusion is also likely to apply to the age of the samples. There were more older adults studies in the non-allegiant than allegiant  
26  
27 301 studies in the algorithm comparison. Depression could be more difficult to identify in older adults due to physical co-morbidities that may  
28  
29 302 present with similar symptomatology to depression and could account for the lower diagnostic performance in the non-allegiant studies.  
30  
31 303 However, the non-allegiant samples in the studies that reported the psychometric properties at cut-off point 10 or above had younger samples  
32  
33 304 than the allegiant studies, so this would not support this interpretation.  
34

35  
36 305  
37 306 The SCID was used as the gold standard in nearly all allegiant studies. The fact that some non-allegiant studies used other gold standards could  
38  
39 307 potentially explain the poorer psychometric properties of the PHQ-9 in these studies. The SCID is often regarded as the most valid of the  
40  
41 308 available semi-structured interviews used in depression diagnostic validity studies as the reference standard. If we assume that this is the case  
42  
43 309 and, furthermore, that the PHQ-9 is an accurate method of screening for depression, then the PHQ-9 may be more likely to agree with the SCID  
44  
45

1  
2  
3  
4  
5 310 than other reference standards. However, when we carried out a sensitivity analysis restricting the sample to SCID only studies the allegiance  
6  
7 311 effect was still predictive of DOR variation between allegiance and non-allegiance studies variation in both algorithm ( $p = 0.01$ ) and summed  
8  
9 312 item scoring at cut-off point of 10 reviews ( $p = 0.02$ ).

10 313

11 314

#### 12 13 14 15 16 315 Differences in methodological quality as potential alternative explanations

17  
18 316 The quality of the studies was evaluated using the QUADAS-2. Although there were several potential methodological differences between the  
19  
20 317 two groups of studies from the algorithm papers, not all of these offer obvious explanations of the observed differences and some are unlikely as  
21  
22 318 explanations. For example, more allegiant studies ensured that the reference test was interpreted blind to the index test. This is unlikely to  
23  
24 319 account for the observed differences, because a lack of blinding is typically associated with artificially increased diagnostic performance, which  
25  
26 320 is in the opposite direction to the pattern of results observed here. The impact of some other differences is less clear-cut. For example, a higher  
27  
28 321 number of the non-allegiant studies met the criterion for consecutive referrals. For this to provide an explanation of the of the observed  
29  
30 322 differences, the non-consecutive nature of the referrals in the studies by those who had developed the PHQ-9 would need to have led to the over-  
31  
32 323 inclusion of true positives or under-inclusion of false negatives given that these studies tended to report higher sensitivity relative to the non-  
33  
34 324 allegiant studies (and vice versa for the independent studies). It is not immediately obvious how this would occur. The allegiant studies were  
35  
36 325 more likely to have met the criterion of 'included all participants in the analysis'. It is possible that the greater loss of participants from the non-  
37  
38 326 allegiant studies may have artificially reduced the observed diagnostic accuracy, though, again, it is not immediately obvious how this would  
39  
40 327 have affected the true positive and false negative rates. Although there is not an obvious explanation of how these differences in methodological  
41  
42 328 quality could account for the observed differences in diagnostic performance, it is important to recognise that they cannot on that basis be ruled  
43  
44 329 out.

1  
2  
3  
4  
5 330

6  
7  
8 331 There are, however, two differences in methodological quality among the algorithm studies that are clearer potential alternative explanations.  
9 332 The higher rate of appropriate translations among the allegiant studies is potentially important, because lower diagnostic estimates may be  
10 333 expected from studies that have poorly translated versions of the index test. In the flow and timing domain, more allegiant studies ensured that  
11 334 there was a less than two-week interval between the index and reference test. This is consistent with lower diagnostic performance in the non-  
12 335 allegiant studies: as the interval increases it is likely that depression status may change and this would lead to lower levels of agreement between  
13 336 the index test and the reference test.

14  
15  
16  
17  
18 337

19  
20  
21 338 There were also differences on some quality assessment items between the two sets of studies in the summed item scoring method comparison.  
22 339 The threshold was reported as pre-specified in all allegiant studies in contrast to approximately three quarters of the non-allegiant studies. On the  
23 340 face of it, this is unlikely to explain the observed differences, because the use of a pre-specified cut-off point is likely to be associated with lower  
24 341 not higher diagnostic test performance. One possibility, however, is that studies that performed poorly at this cut-off point were less likely to be  
25 342 reported by those who had developed the measure. As discussed in more detail in the limitations section, we were unable to explore this  
26 343 possibility through the use of formal tests for publication bias.

27  
28  
29  
30  
31  
32 344

33  
34 345 All allegiant studies avoided inappropriate exclusions compared to approximately half of the non-allegiant studies. While this is a potential  
35 346 alternative explanation of the differences it is not immediately obvious how this would explain the differences in diagnostic performance  
36 347 between the two sets of studies. Fewer than half of the non-allegiant studies met the criterion for 'all participants included in the analysis', in  
37 348 contrast to all of the allegiant studies met this criterion, but again this difference should usually work against the inclusive studies, not those

1  
2  
3  
4  
5 349 excluding cases. More of the non-allegiant studies reported that the PHQ-9 was interpreted blind to the reference test. This does offer a potential  
6  
7 350 explanation, because the absence of blinding may artificially inflate diagnostic accuracy.  
8

9 351

10  
11  
12 352 **Limitations**

13  
14 353 The results of this review need to be viewed in the light of the limitations of the primary studies that contributed to the review and the review  
15  
16 354 itself. An important consideration is to establish whether any observed differences between the diagnostic performance of the non-allegiant and  
17  
18 355 allegiant studies are better accounted for by study characteristic or methodological differences. Caution, however, is needed in interpreting any  
19  
20 356 differences, because of the small number of allegiant studies in both the algorithm and cut-off 10 or above comparisons. The small number of  
21  
22 357 allegiant studies also meant that we were also unable to explore the potential role of publication bias in the non-allegiant and allegiant studies. At  
23  
24 358 least 10 studies are required to use standard methods of examining publication bias, but the number of allegiant studies in both the algorithm and  
25  
26 359 cut-off 10 or above comparisons were fewer than this. Papers published from August 2013 onwards are not covered in the literature search used  
27  
28 360 and so it potentially misses some more recent studies that would be eligible for inclusion although it is unlikely that many, if any, new allegiant  
29  
30 361 studies have been published since.  
31

32 362

33 363

34 364

35  
36  
37 365 **Conclusions and implications for further research.**  
38  
39  
40  
41  
42  
43  
44  
45

1  
2  
3  
4  
5 366 The aims of the review was to investigate whether an allegiance effect is found that leads to an increased diagnostic performance in diagnostic  
6  
7 367 validation studies that were conducted by teams connected to the original developers of the PHQ-9. Our analyses showed that diagnostic studies  
8  
9 368 conducted by independent/non-allegiant researchers had lower sensitivity paired with similar specificity compared to studies that were classified  
10 369 as allegiant. This conclusion held for both the algorithm and cut-off 10 or above studies. We explored a range of possible alternative  
11 370 explanations for the observed allegiance effect including both differences in study characteristics and study quality. A number of potential  
12 371 differences were found, though for some of these it is not clear how they would necessarily account for the observed differences. However, there  
13  
14 372 were a number of differences that offered potential alternative explanations unconnected to allegiance effects. In the algorithm studies, the  
15 373 studies rated as allegiant were also more likely to use an appropriate translation of the PHQ-9 and were also more likely to ensure that the index  
16  
17 374 and reference test were conducted within two weeks of each other, both of which may be associated with an improvement in observed diagnostic  
18  
19 375 performance of an instrument. The majority of studies in both meta-analyses did not provide clear statements about potential conflict of interest  
20  
21 376 and/or funding, however the newer studies were more likely to provide such statements, which may reflect increasing transparency in this area of  
22  
23 377 research.  
24  
25  
26 378

27  
28 379 We cannot, therefore, conclude that allegiance effects are present in studies examining the diagnostic performance of the PHQ-9; but nor can we  
29  
30 380 rule them out. Conflicts of interest are an important area of investigation in medical and behavioural research, particularly due to concerns about  
31  
32 381 trial results being influenced by industry sponsorship. Future diagnostic validity in this area should as a matter of routine present clear statements  
33  
34 382 about potential conflicts of interest and funding, particularly relating to the development of the instrument under evaluation. Future meta-  
35  
36 383 analyses of diagnostic validation studies of psychological measures should routinely evaluate the impact of researcher allegiance in the primary  
37  
38 384 studies examined in the meta-analysis.  
39  
40 385

1  
2  
3  
4  
5 386  
6  
7

8 387 **Contributors** LM led on all stages of the review and is the guarantor. We used an established database of diagnostic validation studies of the  
9 388 PHQ-9 [13], [14] SG provided expert advice on methodology and approaches to assessment of the evidence base. AM carried out the literature  
10 389 searches, screened the studies, extracted data and assessed the quality of the included studies for one of the systematic reviews (Moriarty et al.,  
11 390 2015) . LM carried out the literature searches, screened the studies, extracted data and assessed the quality of the included studies for the other  
12 391 systematic review (Manea et al., 2015), analysed the data for both systematic reviews and drafted the report. JB was involved in the development  
13 392 of the study, wrote the introduction section of the review and contributed to the production of the final report. DM supervised the quality  
14 393 assessment, methodology and approaches to evidence synthesis, provided senior advice and support throughout and contributed to the  
15 394 production of the final report. All parties were involved in drafting and/or commenting on the report.  
16  
17  
18  
19  
20

21  
22 395  
23

24 396 **Competing interests** None declared.  
25

26  
27 397 **Funding** LM was an NIHR Clinical Lecturer when this research was carried out. The NIHR had no role in the study design, methods, data  
28 398 collection, analysis or interpretation of data, nor any role in the preparation of the manuscript or decision to submit the manuscript for publication.  
29  
30

31 399  
32

33 400 **Provenance and peer review** Not commissioned; externally peer reviewed.  
34  
35

36 401  
37

38 402 **Data sharing statement** No additional data are available.  
39  
40  
41  
42  
43  
44  
45

## 403 REFERENCES

- 404 [1] L. Luborsky, L. Diguer, D. A. Seligman, R. Rosenthal, E. D. Krause, S. Johnson, G. Halperin, M. Bishop, J. S. Berman, and E.  
405 Schweizer, "The Researcher's Own Therapy Allegiances: A 'Wild Card' in Comparisons of Treatment Efficacy," *Clin. Psychol. Sci.*  
406 *Pract.*, vol. 6, no. 1, pp. 95–106, May 2006.
- 407 [2] E. Dragioti, I. Dimoliatis, and E. Evangelou, "Disclosure of researcher allegiance in meta-analyses and randomised controlled trials of  
408 psychotherapy: a systematic appraisal," *BMJ Open*, vol. 5, no. 6, pp. e007206–e007206, Jun. 2015.
- 409 [3] T. Munder, O. Brüttsch, R. Leonhart, H. Gerger, and J. Barth, "Researcher allegiance in psychotherapy outcome research: An overview of  
410 reviews," *Clin. Psychol. Rev.*, vol. 33, no. 4, pp. 501–511, Jun. 2013.
- 411 [4] D. A. Winter, "Editorial." Routledge, 07-May-2010.
- 412 [5] J. McLeod, "Taking allegiance seriously—implications for research policy and practice," *Eur. J. Psychother. Couns.*, May 2010.
- 413 [6] G. L. Staines and C. M. Cleland, "Bias in meta-analytic estimates of the absolute efficacy of psychotherapy.," *Rev. Gen. Psychol.*, vol. 11,  
414 no. 4, pp. 329–347, 2007.
- 415 [7] K. D. Markman and E. R. Hirt, "Social Prediction and the 'Allegiance Bias,'" *Soc. Cogn.*, vol. 20, no. 1, pp. 58–86, Feb. 2002.
- 416 [8] G. D. Walters, "The Psychological Inventory of Criminal Thinking Styles and Psychopathy Checklist: Screening version as incrementally  
417 valid predictors of recidivism.," *Law Hum. Behav.*, vol. 33, no. 6, pp. 497–505, 2009.
- 418 [9] J. P. Singh, M. Grann, and S. Fazel, "Authorship Bias in Violence Risk Assessment? A Systematic Review and Meta-Analysis," *PLoS*  
419 *One*, vol. 8, no. 9, p. e72484, Sep. 2013.



- 1  
2  
3  
4  
5 420 [10] P. R. Blair, D. K. Marcus, and M. T. Boccaccini, "Is There an Allegiance Effect for Assessment Instruments? Actuarial Risk Assessment  
6 as an Exemplar," *Clin. Psychol. Sci. Pract.*, vol. 15, no. 4, pp. 346–360, Oct. 2008.  
7 421  
8  
9 422 [11] S. O. Lilienfeld and M. K. Jones, "Allegiance Effects in Assessment: Unresolved Questions, Potential Explanations, and Constructive  
10 Remedies," *Clin. Psychol. Sci. Pract.*, vol. 15, no. 4, pp. 361–365, Oct. 2008.  
11 423  
12  
13 424 [12] K. Kroenke, R. L. Spitzer, and J. B. Williams, "The PHQ-9: validity of a brief depression severity measure.," *J. Gen. Intern. Med.*, vol.  
14 16, no. 9, pp. 606–13, Sep. 2001.  
15 425  
16  
17 426 [13] L. Manea, S. Gilbody, and D. McMillan, "A diagnostic meta-analysis of the Patient Health Questionnaire-9 (PHQ-9) algorithm scoring  
18 method as a screen for depression," *Gen. Hosp. Psychiatry*, vol. 37, no. 1, pp. 67–75, Jan. 2015.  
19 427  
20  
21 428 [14] A. S. Moriarty, S. Gilbody, D. McMillan, and L. Manea, "Screening and case finding for major depressive disorder using the Patient  
22 Health Questionnaire (PHQ-9): a meta-analysis," *Gen. Hosp. Psychiatry*, vol. 37, no. 6, pp. 567–576, Nov. 2015.  
23 429  
24  
25 430 [15] P. F. Whiting, A. W. S. Rutjes, M. E. Westwood, S. Mallett, J. J. Deeks, J. B. Reitsma, M. M. G. Leeflang, J. A. C. Sterne, P. M. M.  
26 Bossuyt, and QUADAS-2 Group, "QUADAS-2: a revised tool for the quality assessment of diagnostic accuracy studies.," *Ann. Intern.  
27 Med.*, vol. 155, no. 8, pp. 529–36, Oct. 2011.  
28 431  
29 432  
30  
31 433 [16] R. Mann, C. E. Hewitt, and S. M. Gilbody, "Assessing the quality of diagnostic studies using psychometric instruments: applying  
32 QUADAS," *Soc. Psychiatry Psychiatr. Epidemiol.*, vol. 44, no. 4, pp. 300–307, Apr. 2009.  
33 434  
34  
35 435 [17] J. B. Reitsma, A. S. Glas, A. W. S. Rutjes, R. J. P. M. Scholten, P. M. Bossuyt, and A. H. Zwinderman, "Bivariate analysis of sensitivity  
36 and specificity produces informative summary measures in diagnostic reviews," *J. Clin. Epidemiol.*, vol. 58, no. 10, pp. 982–990, Oct.  
37 436  
38 437  
39  
40  
41  
42  
43  
44  
45  
46  
47  
48  
49

- 1  
2  
3  
4  
5 438 [18] University of York. NHS Centre for Reviews and Dissemination., *Systematic reviews : CRD's guidance for undertaking reviews in health*  
6 439 *care*. CRD, University of York, 2009.
- 7  
8  
9 440 [19] S. D. Walter, "Properties of the summary receiver operating characteristic (SROC) curve for diagnostic test data," *Stat. Med.*, vol. 21, no.  
10 441 9, pp. 1237–1256, May 2002.
- 11  
12  
13 442 [20] J. G. Lijmer, P. M. M. Bossuyt, and S. H. Heisterkamp, "Exploring sources of heterogeneity in systematic reviews of diagnostic tests,"  
14 443 *Stat. Med.*, vol. 21, no. 11, pp. 1525–1537, Jun. 2002.
- 15  
16  
17 444 [21] S. G. Thompson and J. P. T. Higgins, "How should meta-regression analyses be undertaken and interpreted?," *Stat. Med.*, vol. 21, no. 11,  
18 445 pp. 1559–1573, Jun. 2002.
- 19  
20  
21 446 [22] C. Diez-Quevedo, T. Rangil, L. Sanchez-Planell, K. Kroenke, and R. L. Spitzer, "Validation and utility of the patient health questionnaire  
22 447 in diagnosing mental disorders in 1003 general hospital Spanish inpatients.," *Psychosom. Med.*, vol. 63, no. 4, pp. 679–86.
- 23  
24  
25 448 [23] K. Gräfe, S. Zipfel, W. Herzog, and B. Löwe, "Screening psychischer Störungen mit dem "Gesundheitsfragebogen für Patienten (PHQ-  
26 449 D)," *Diagnostica*, vol. 50, no. 4, pp. 171–181, Oct. 2004.
- 27  
28  
29 450 [24] B. Löwe, R. L. Spitzer, K. Gräfe, K. Kroenke, A. Quenter, S. Zipfel, C. Buchholz, S. Witte, and W. Herzog, "Comparative validity of  
30 451 three screening questionnaires for DSM-IV depressive disorders and physicians' diagnoses.," *J. Affect. Disord.*, vol. 78, no. 2, pp. 131–40,  
31 452 Feb. 2004.
- 32  
33  
34 453 [25] R. L. Spitzer, K. Kroenke, and J. B. Williams, "Validation and utility of a self-report version of PRIME-MD: the PHQ primary care study.  
35 454 Primary Care Evaluation of Mental Disorders. Patient Health Questionnaire.," *JAMA*, vol. 282, no. 18, pp. 1737–44, Nov. 1999.
- 36  
37  
38 455 [26] P. Thekkumpurath, J. Walker, I. Butcher, L. Hodges, A. Kleiboer, M. O'Connor, L. Wall, G. Murray, K. Kroenke, and M. Sharpe,  
39  
40  
41  
42  
43  
44  
45  
46  
47  
48  
49

- 1  
2  
3  
4  
5 456 “Screening for major depression in cancer outpatients: the diagnostic accuracy of the 9-item patient health questionnaire.,” *Cancer*, vol.  
6 457 117, no. 1, pp. 218–27, Jan. 2011.
- 8  
9 458 [27] K. Muramatsu, H. Miyaoka, K. Kamijima, Y. Muramatsu, M. Yoshida, T. Otsubo, and F. Gejyo, “The patient health questionnaire,  
10 459 Japanese version: validity according to the mini-international neuropsychiatric interview-plus.,” *Psychol. Rep.*, vol. 101, no. 3 Pt 1, pp.  
11 460 952–60, Dec. 2007.
- 14  
15 461 [28] R. Navinés, P. Castellví, J. Moreno-España, D. Gimenez, M. Udina, S. Cañizares, C. Diez-Quevedo, M. Valdés, R. Solà, and R. Martín-  
16 462 Santos, “Depressive and anxiety disorders in chronic hepatitis C patients: Reliability and validity of the Patient Health Questionnaire,” *J.*  
17 463 *Affect. Disord.*, vol. 138, no. 3, pp. 343–351, May 2012.
- 20  
21 464 [29] S. M. Eack, C. G. Greeno, and B.-J. Lee, “Limitations of the Patient Health Questionnaire in Identifying Anxiety and Depression: Many  
22 465 Cases Are Undetected.,” *Res. Soc. Work Pract.*, vol. 16, no. 6, pp. 625–631, Nov. 2006.
- 24  
25 466 [30] J. R. Fann, C. H. Bombardier, S. Dikmen, P. Esselman, C. A. Warmes, E. Pelzer, H. Rau, and N. Temkin, “Validity of the Patient Health  
26 467 Questionnaire-9 in assessing depression following traumatic brain injury.,” *J. Head Trauma Rehabil.*, vol. 20, no. 6, pp. 501–11.
- 28  
29 468 [31] B. Gelaye, M. A. Williams, S. Lemma, N. Deyessa, Y. Bahretibeb, T. Shibre, D. Wondimagegn, A. Lemenhe, J. R. Fann, A. Vander  
30 469 Stoep, and X.-H. H. Andrew Zhou, “Validity of the patient health questionnaire-9 for depression screening and diagnosis in East Africa,”  
31 470 *Psychiatry Res.*, vol. 210, no. 2, pp. 653–661, Dec. 2013.
- 34  
35 471 [32] T. Hyphantis, K. Kotsis, P. V. Voulgari, N. Tsifetaki, F. Creed, and A. A. Drosos, “Diagnostic accuracy, internal consistency, and  
36 472 convergent validity of the Greek version of the patient health questionnaire 9 in diagnosing depression in rheumatologic disorders,”  
37 473 *Arthritis Care Res. (Hoboken)*, vol. 63, no. 9, pp. 1313–1321, Sep. 2011.

- 1  
2  
3  
4  
5 474 [33] M. Inagaki, T. Ohtsuki, N. Yonemoto, Y. Kawashima, A. Saitoh, Y. Oikawa, M. Kurosawa, K. Muramatsu, T. A. Furukawa, and M.  
6 Yamada, "Validity of the Patient Health Questionnaire (PHQ)-9 and PHQ-2 in general internal medicine primary care at a Japanese rural  
7 475 hospital: a cross-sectional study.," *Gen. Hosp. Psychiatry*, vol. 35, no. 6, pp. 592–7, Jan. 2013.  
8 476
- 9  
10  
11 477 [34] M. E. Khamseh, H. R. Baradaran, A. Javanbakht, M. Mirghorbani, Z. Yadollahi, and M. Malek, "Comparison of the CES-D and PHQ-9  
12 478 depression scales in people with type 2 diabetes in Tehran, Iran," *BMC Psychiatry*, vol. 11, no. 1, p. 61, Dec. 2011.
- 13  
14  
15 479 [35] P. Persoons, K. Luyckx, C. Desloovere, J. Vandenberghe, and B. Fischler, "Anxiety and mood disorders in otorhinolaryngology  
16 480 outpatients presenting with dizziness: validation of the self-administered PRIME-MD Patient Health Questionnaire and epidemiology.,"  
17 481 *Gen. Hosp. Psychiatry*, vol. 25, no. 5, pp. 316–23.
- 18  
19  
20  
21 482 [36] A. Picardi, D. A. Adler, D. Abeni, H. Chang, P. Pasquini, W. H. Rogers, and K. M. Bungay, "Screening for depressive disorders in  
22 483 patients with skin diseases: a comparison of three screeners.," *Acta Derm. Venereol.*, vol. 85, no. 5, pp. 414–9, 2005.
- 23  
24  
25 484 [37] L. Stafford, M. Berk, and H. J. Jackson, "Validity of the Hospital Anxiety and Depression Scale and Patient Health Questionnaire-9 to  
26 485 screen for depression in patients with coronary artery disease," *Gen. Hosp. Psychiatry*, vol. 29, no. 5, pp. 417–424, Sep. 2007.
- 27  
28  
29 486 [38] B. D. Thombs, R. C. Ziegelstein, and M. A. Whooley, "Optimizing detection of major depression among patients with coronary artery  
30 487 disease using the patient health questionnaire: data from the heart and soul study.," *J. Gen. Intern. Med.*, vol. 23, no. 12, pp. 2014–7, Dec.  
31 488 2008.
- 32  
33  
34  
35 489 [39] A. W. Thompson, H. Liu, R. D. Hays, W. J. Katon, R. Rausch, N. Diaz, E. L. Jacob, S. D. Vassar, and B. G. Vickrey, "Diagnostic  
36 490 accuracy and agreement across three depression assessment measures for Parkinson's disease," *Parkinsonism Relat. Disord.*, vol. 17, no.  
37 491 1, pp. 40–45, Jan. 2011.

- 1  
2  
3  
4  
5 492 [40] A. Turner, J. Hambridge, J. White, G. Carter, K. Clover, L. Nelson, and M. Hackett, "Depression screening in stroke: a comparison of  
6 alternative measures with the structured diagnostic interview for the diagnostic and statistical manual of mental disorders, fourth edition  
7 493 (major depressive episode) as criterion standard.," *Stroke.*, vol. 43, no. 4, pp. 1000–5, Apr. 2012.  
8 494
- 9  
10  
11 495 [41] K. M. van Steenbergen-Weijenburg, L. de Vroege, R. R. Ploeger, J. W. Brals, M. G. Vloedveld, T. F. Veneman, L. Hakkaart-van Roijen,  
12 496 F. F. Rutten, A. T. Beekman, and C. M. van der Feltz-Cornelis, "Validation of the PHQ-9 as a screening instrument for depression in  
13 497 diabetes patients in specialized outpatient clinics," *BMC Health Serv. Res.*, vol. 10, no. 1, p. 235, Dec. 2010.
- 14  
15  
16  
17 498 [42] B. Arroll, F. Goodyear-Smith, S. Crengle, J. Gunn, N. Kerse, T. Fishman, K. Falloon, and S. Hatcher, "Validation of PHQ-2 and PHQ-9  
18 499 to Screen for Major Depression in the Primary Care Population," *Ann. Fam. Med.*, vol. 8, no. 4, pp. 348–353, Jul. 2010.
- 19  
20  
21 500 [43] L. Ayalon, M. Goldfracht, and P. Bech, "'Do you think you suffer from depression?' Reevaluating the use of a single item question for  
22 501 the screening of depression in older primary care patients," *Int. J. Geriatr. Psychiatry*, vol. 25, no. 5, pp. 497–502, May 2010.
- 23  
24  
25 502 [44] V. Henkel, R. Mergl, R. Kohnen, A.-K. Allgaier, H.-J. Möller, and U. Hegerl, "Use of brief depression screening tools in primary care:  
26 503 consideration of heterogeneity in performance in different patient groups," *Gen. Hosp. Psychiatry*, vol. 26, no. 3, pp. 190–198, May 2004.
- 27  
28  
29 504 [45] F. Lamers, C. C. M. Jonkers, H. Bosma, B. W. J. H. Penninx, J. A. Knottnerus, and J. T. M. van Eijk, "Summed score of the Patient  
30 505 Health Questionnaire-9 was a reliable and valid method for depression screening in chronically ill elderly patients," *J. Clin. Epidemiol.*,  
31 506 vol. 61, no. 7, pp. 679–687, Jul. 2008.
- 32  
33  
34  
35 507 [46] M. Lotrakul, S. Sumrithe, and R. Saipanish, "Reliability and validity of the Thai version of the PHQ-9," *BMC Psychiatry*, vol. 8, no. 1, p.  
36 508 46, Dec. 2008.
- 37  
38  
39 509 [47] N. P. Zuithoff, Y. Vergouwe, M. King, I. Nazareth, M. J. van Wezep, K. G. Moons, and M. I. Geerlings, "The Patient Health  
40  
41  
42  
43  
44  
45

- 1  
2  
3  
4  
5 510 Questionnaire-9 for detection of major depressive disorder in primary care: consequences of current thresholds in a cross-sectional study,”  
6  
7 511 *BMC Fam. Pract.*, vol. 11, no. 1, p. 98, Dec. 2010.
- 8  
9 512 [48] D. Gjerdingen, S. Crow, P. McGovern, M. Miner, and B. Center, “Postpartum depression screening at well-child visits: validity of a 2-  
10 513 question screen and the PHQ-9,” *Ann. Fam. Med.*, vol. 7, no. 1, pp. 63–70, 2009.
- 11  
12 514 [49] L. S. Williams, E. J. Brizendine, L. Plue, T. Bakas, W. Tu, H. Hendrie, and K. Kroenke, “Performance of the PHQ-9 as a screening tool  
13 515 for depression after stroke,” *Stroke.*, vol. 36, no. 3, pp. 635–8, Mar. 2005.
- 14  
15 516 [50] M. H. N. Chagas, V. Tumas, G. R. Rodrigues, J. P. Machado-de-Sousa, A. S. Filho, J. E. C. Hallak, and J. A. S. Crippa, “Validation and  
16 517 internal consistency of Patient Health Questionnaire-9 for major depression in Parkinson’s disease,” *Age Ageing*, vol. 42, no. 5, pp. 645–  
17 518 649, Sep. 2013.
- 18  
19 519 [51] L. Elderon, K. G. Smolderen, B. Na, and M. A. Whooley, “Accuracy and prognostic value of American Heart Association: recommended  
20 520 depression screening in patients with coronary heart disease: data from the Heart and Soul Study,” *Circ. Cardiovasc. Qual. Outcomes*,  
21 521 vol. 4, no. 5, pp. 533–40, Sep. 2011.
- 22  
23 522 [52] A. G. Rooney, S. McNamara, M. Mackinnon, M. Fraser, R. Rampling, A. Carson, and R. Grant, “Screening for major depressive disorder  
24 523 in adults with cerebral glioma: an initial validation of 3 self-report instruments,” *Neuro. Oncol.*, vol. 15, no. 1, pp. 122–129, Jan. 2013.
- 25  
26 524 [53] S. Watnick, P.-L. Wang, T. Demadura, and L. Ganzini, “Validation of 2 depression screening tools in dialysis patients,” *Am. J. Kidney*  
27 525 *Dis.*, vol. 46, no. 5, pp. 919–24, Nov. 2005.
- 28  
29 526 [54] Y. Zhang, R. Ting, M. Lam, J. Lam, H. Nan, R. Yeung, W. Yang, L. Ji, J. Weng, Y.-K. Wing, N. Sartorius, and J. C. N. Chan,  
30 527 “Measuring depressive symptoms using the Patient Health Questionnaire-9 in Hong Kong Chinese subjects with type 2 diabetes,” *J.*

- 1  
2  
3  
4  
5 528 *Affect. Disord.*, vol. 151, no. 2, pp. 660–666, Nov. 2013.
- 6  
7  
8 529 [55] A. O. Adewuya, B. A. Ola, and O. O. Afolabi, “Validity of the patient health questionnaire (PHQ-9) as a screening tool for depression  
9 530 amongst Nigerian university students,” *J. Affect. Disord.*, vol. 96, no. 1–2, pp. 89–93, Nov. 2006.
- 11 531 [56] T. H. Fine, A. A. Contractor, M. Tamburrino, J. D. Elhai, M. R. Prescott, G. H. Cohen, E. Shirley, P. K. Chan, T. Goto, R. Slembariski, I.  
12 532 Liberzon, S. Galea, and J. R. Calabrese, “Validation of the telephone-administered PHQ-9 against the in-person administered SCID-I  
13 533 major depression module,” *J. Affect. Disord.*, vol. 150, no. 3, pp. 1001–1007, Sep. 2013.
- 15 534 [57] S. Gilbody, D. Richards, S. Brealey, and C. Hewitt, “Screening for depression in medical settings with the Patient Health Questionnaire  
16 535 (PHQ): A diagnostic meta-analysis,” *J. Gen. Intern. Med.*, vol. 22, no. 11, pp. 1596–1602, Oct. 2007.
- 18 536 [58] E. Phelan, B. Williams, K. Meeker, K. Bonn, J. Frederick, J. LoGerfo, and M. Snowden, “A study of the diagnostic accuracy of the PHQ-  
19 537 9 in primary care elderly,” *BMC Fam. Pract.*, vol. 11, no. 1, p. 63, Dec. 2010.
- 21 538 [59] A. C. Sidebottom, P. A. Harrison, A. Godecker, and H. Kim, “Validation of the Patient Health Questionnaire (PHQ)-9 for prenatal  
22 539 depression screening,” *Arch. Womens. Ment. Health*, vol. 15, no. 5, pp. 367–374, Oct. 2012.
- 24 540 [60] F. de Lima Osório, A. Vilela Mendes, J. A. Crippa, and S. R. Loureiro, “Study of the Discriminative Validity of the PHQ-9 and PHQ-2 in  
25 541 a Sample of Brazilian Women in the Context of Primary Health Care,” *Perspect. Psychiatr. Care*, vol. 45, no. 3, pp. 216–227, Jul. 2009.
- 27 542 [61] V. Patel, R. Araya, N. Chowdhary, M. King, B. Kirkwood, S. Nayak, G. Simon, and H. A. Weiss, “Detecting common mental disorders in  
28 543 primary care in India: a comparison of five screening questionnaires,” *Psychol. Med.*, vol. 38, no. 2, Feb. 2008.
- 30 544 [62] M. N. N. Azah, M. E. M. Shah, S. Juwita, I. S. Bahri, W. M. W. M. Rushidi, and Y. M. Jamil, “Validation of the Malay Version Brief  
31 545 Patient Health Questionnaire (PHQ-9) among Adult Attending Family Medicine Clinics.,” *Int. Med. J.*, 2005.

- 1  
2  
3  
4  
5 546 [63] S.-I. Liu, Z.-T. Yeh, H.-C. Huang, F.-J. Sun, J.-J. Tjung, L.-C. Hwang, Y.-H. Shih, and A. W.-C. Yeh, "Validation of Patient Health  
6 Questionnaire for depression screening among primary care patients in Taiwan," *Compr. Psychiatry*, vol. 52, no. 1, pp. 96–101, Jan. 2011.  
7 547  
8  
9 548 [64] K. Wittkamp, H. van Ravesteijn, K. Baas, H. van de Hoogen, A. Schene, P. Bindels, P. Lucassen, E. van de Lisdonk, and H. van Weert,  
10 549 "The accuracy of Patient Health Questionnaire-9 in detecting depression and measuring depression severity in high-risk groups in primary  
11 550 care," *Gen. Hosp. Psychiatry*, vol. 31, no. 5, pp. 451–459, Sep. 2009.  
12  
13  
14  
15 551  
16  
17 552  
18  
19  
20 553  
21  
22 554  
23  
24  
25 555  
26  
27 556  
28  
29  
30 557  
31  
32 558  
33  
34  
35 559  
36  
37 560  
38  
39  
40 561  
41  
42  
43  
44  
45  
46  
47  
48  
49



1  
2  
3  
4  
5  
6  
7  
8  
9  
10  
11  
12  
13  
14  
15  
16  
17  
18  
19  
20  
21  
22  
23  
24  
25  
26  
27  
28  
29  
30  
31  
32  
33  
34  
35  
36  
37  
38  
39  
40  
41  
42  
43  
44  
45  
46  
47  
48  
49

562

| <b>Table 1: Descriptive characteristics of algorithm studies (Manea et al., 2014)</b> |                                                                                                                                                 |                                                                                |                                                     |                            | <b>a) Conflict of interest (COI) declaration</b><br><b>b) Funding</b><br><b>c) Relationship with original developers</b> |
|---------------------------------------------------------------------------------------|-------------------------------------------------------------------------------------------------------------------------------------------------|--------------------------------------------------------------------------------|-----------------------------------------------------|----------------------------|--------------------------------------------------------------------------------------------------------------------------|
| <b>Study</b>                                                                          | <b>Sample characteristics<br/>(Country, setting, age, sex)</b>                                                                                  | <b>Sample size and % depressed</b>                                             | <b>PHQ-9 characteristics</b>                        | <b>Diagnostic standard</b> |                                                                                                                          |
| Diez-Quevedo et al. (2001)                                                            | Country: Spain<br><br>Setting: Medical and surgical tertiary hospitals<br><br>Age (yrs): M=43 (SD=14.2)<br><br>Female: 45.6%                    | N = 1003<br>Depressed: 8.2%                                                    | Administration: Self-report<br>Language: Spanish    | DSM-III-R SCID             | a) No COI declaration<br>b) Funding acknowledged (academic institutions)<br>c) Not acknowledged                          |
| Gräfe et al. (2004)                                                                   | Country: Germany<br><br>Setting: psychosomatic walk-in clinics and family practices<br><br>Age (yrs): M = 41.9 (SD = 13.8)<br><br>Female: 67.8% | N = 528<br><br>Depressed: 29.2% psychosomatic patients; 6.16% medical patients | Language: German<br><br>Administration: self-report | DSM-IV SCID                | a) No COI declaration<br>b) Acknowledged funding from Pfizer<br>c) Not acknowledged                                      |

|                         |                                                                                                                                     |                                 |                                                       |                |                                                                                                                                                                                                                                                                                        |
|-------------------------|-------------------------------------------------------------------------------------------------------------------------------------|---------------------------------|-------------------------------------------------------|----------------|----------------------------------------------------------------------------------------------------------------------------------------------------------------------------------------------------------------------------------------------------------------------------------------|
| Lowe et al. (2004)      | Country: Germany<br><br>Setting: Outpatient clinics and family practices<br>Age (yrs): M = 41.7 (SD = 13.8)<br>Female: 67.1%        | N = 501<br><br>Depressed: 13.2% | Administration: Self-report<br>Language: German       | DSM-IV<br>SCID | a) COI declaration 'This study was supported by unrestricted restricted grants from Pfizer Germany and from the medical faculty of the University of Heidelberg Germany, and there are no COI.'<br>b) Acknowledged funding from Pfizer and academic institution<br>c) Not acknowledged |
| Muramatsu et al. (2007) | Country: Japan<br><br>Setting: Primary care and general hospital<br><br>Age (yrs): M = 43.3 (SD = 16.4)<br>Female: 59.5%            | N = 131<br><br>Depressed: 28.2% | Administration: Self-report<br><br>Language: Japanese | DSM-IV<br>MINI | a) No COI declaration<br>b) Acknowledged funding from Pfizer<br>c) Acknowledged one of the developers of the PHQ-9: 'The authors acknowledge Dr R L Spitzer'                                                                                                                           |
| Navinés et al. (2012)   | Country: Spain<br><br>Setting: General hospital (patients with chronic HCV)<br><br>Age (yrs): M = 43.4 (SD = 10.2)<br>Female: 28.6% | N = 500<br>Depressed: 6.4%      | Administration: Self-report<br><br>Language: Spanish  | DSM-IV<br>SCID | a) All authors declared that they had no COI.<br>b) Role of funding source declared<br>c) Not acknowledged                                                                                                                                                                             |

|                                                                                                                                                    |                             |                                                                                                    |                                                      |                                                                 |                |                                                                                                                                                                                                                                                                                                                                                                                                                                                                                                                                                                                                                         |
|----------------------------------------------------------------------------------------------------------------------------------------------------|-----------------------------|----------------------------------------------------------------------------------------------------|------------------------------------------------------|-----------------------------------------------------------------|----------------|-------------------------------------------------------------------------------------------------------------------------------------------------------------------------------------------------------------------------------------------------------------------------------------------------------------------------------------------------------------------------------------------------------------------------------------------------------------------------------------------------------------------------------------------------------------------------------------------------------------------------|
| 1<br>2<br>3<br>4<br>5<br>6<br>7<br>8<br>9<br>10<br>11<br>12<br>13<br>14                                                                            | Spitzer et al. (1999)       | Country: US<br><br>Setting: Primary care<br><br>Age (yrs): M = 46 (SD = 17.2)<br><br>Female: 66%   | N = 3000 (585 received SCID)<br><br>Depressed: 10%   | Administration: Self-report<br><br>Language: English            | DSM-III-R SCID | a) No COI declaration<br>b) Acknowledged funding from Pfizer. 'Drs Spitzer and Williams receive honoraria and consulting money from Pfizer Inc, which has supported this work.'<br>c) N/A                                                                                                                                                                                                                                                                                                                                                                                                                               |
| 15<br>16<br>17<br>18<br>19<br>20<br>21<br>22<br>23<br>24                                                                                           | Thekkumpurath et al. (2010) | Country: UK<br><br>Setting: Hospital (cancer patients)<br><br>Age (yrs): M = 61<br><br>Female: 63% | N = 782<br><br>Depressed: 6.3% (of the whole sample) | Administration: Not stated<br><br>Language: English             | DSM-IV SCID    | a) COI declaration: 'Supported by Cancer Research UK'<br>b) As in a)<br>c) Not acknowledged                                                                                                                                                                                                                                                                                                                                                                                                                                                                                                                             |
| 25<br>26<br>27<br>28<br>29<br>30<br>31<br>32<br>33<br>34<br>35<br>36<br>37<br>38<br>39<br>40<br>41<br>42<br>43<br>44<br>45<br>46<br>47<br>48<br>49 | Ayalon et al. (2010)        | Country: Israel<br><br>Age (yrs): M = 75 (SD = 8.1)<br><br>Female: 40.5 %                          | N = 153<br>Depressed: 3.9 %                          | Administration: Researcher administered<br><br>Language: Hebrew | DSM-IV SCID    | a) COI declaration: 'The project was funded by an Investigator's Initiated Research Grant from Lundbeck International given to Dr Liat Ayalon. Lundbeck International had no other involvement in the project concept of design or in this paper. Per Bech has occasionally over the past 3 years until August 2008 received funding from and has been speaker or member of advisory boards for pharmaceutical companies with an interest in the drug treatment of affective disorders (Astra-Zeneca, Lilly, H. Lundbeck A/S, Lundbeck Foundation and Organon).'<br>b) Acknowledged funding from Lundbeck International |

|                    |                                                                                                                                              |                                 |                                                                 |             |                                                                                           |
|--------------------|----------------------------------------------------------------------------------------------------------------------------------------------|---------------------------------|-----------------------------------------------------------------|-------------|-------------------------------------------------------------------------------------------|
| Eack et al. (2006) | Country: US<br><br>Setting: Community mental health centers for children<br><br>Age (yrs): M = 39.20 (SD 9.63)<br><br>Female: 100%           | N = 50<br><br>Depressed: 28%    | Administration: Self-report<br><br>Language: English            | DSM-IV SCID | a) No COI declaration<br>b) Funding acknowledged (academic /health research institutions) |
| Fann et al. (2005) | Country: US<br><br>Setting: Trauma hospital (inpatients with traumatic brain injury)<br><br>Age (yrs): M = 42 (SD=17.9)<br><br>Female: 29.1% | N = 135<br><br>Depressed: 16.3% | Administration: Telephone-administered<br><br>Language: English | DSM-IV SCID | a) No COI declaration<br>b) Funding acknowledged (academic institutions)                  |

1  
2  
3  
4  
5  
6  
7  
8  
9  
10  
11  
12  
13  
14  
15  
16  
17  
18  
19  
20  
21  
22  
23  
24  
25  
26  
27  
28  
29  
30  
31  
32  
33  
34  
35  
36  
37  
38  
39  
40  
41  
42  
43  
44  
45  
46  
47  
48  
49

|                                 |                                                                                                                      |                                        |                                                                                  |                        |                                                                                                   |
|---------------------------------|----------------------------------------------------------------------------------------------------------------------|----------------------------------------|----------------------------------------------------------------------------------|------------------------|---------------------------------------------------------------------------------------------------|
| <p>Gelaye et al. (2011)</p>     | <p>Country:<br/>Ethiopia</p> <p>Setting: General hospital</p> <p>Age (yrs): 34.9 (SD=11.6)</p> <p>Female: 63.1 %</p> | <p>N = 363</p> <p>Depressed: 12.6%</p> | <p>Administration:<br/>Researcher-administered</p> <p>Language:<br/>Amharic</p>  | <p>DSM-IV<br/>SCAN</p> | <p>a) No COI declaration<br/>b) Funding acknowledged (academic /health research institutions)</p> |
| <p>Gjerdingen et al. (2009)</p> | <p>Country: US</p> <p>Setting: Community</p> <p>Age (yrs): M = 29.3</p> <p>Female: 100%</p>                          | <p>N = 438</p> <p>Depressed: 4.6%</p>  | <p>Administration:<br/>Telephone or self-report</p> <p>Language:<br/>English</p> | <p>DSM-IV<br/>SCID</p> | <p>a) No COI declaration<br/>b) Funding acknowledged (academic /health research institutions)</p> |
| <p>Henkel et al. (2004)</p>     | <p>Country:<br/>Germany</p> <p>Setting: primary care</p> <p>Age (yrs): not reported</p> <p>Female: 74%</p>           | <p>N = 448</p> <p>Depressed: 10%</p>   | <p>Administration:<br/>self-report</p> <p>Language:<br/>German</p>               | <p>DSM-IV<br/>CIDI</p> | <p>a) No COI declaration<br/>b) Funding acknowledged (academic /health research institutions)</p> |

|                                                                                                                                  |                         |                                                                                                                            |                                                         |                                                                   |             |                                                                                                                                                          |
|----------------------------------------------------------------------------------------------------------------------------------|-------------------------|----------------------------------------------------------------------------------------------------------------------------|---------------------------------------------------------|-------------------------------------------------------------------|-------------|----------------------------------------------------------------------------------------------------------------------------------------------------------|
| 1<br>2<br>3<br>4<br>5<br>6<br>7<br>8<br>9<br>10<br>11<br>12<br>13<br>14<br>15                                                    | Hyphantis et al. (2011) | Country: Greece<br><br>Setting: Hospital – rheumatology patients<br><br>Age (yrs): M = 54.2 (SD = 13.5)<br><br>Female: 74% | N = 213<br><br>Depressed: 32.4%                         | Administration: Researcher administered<br><br>Language: Greek    | DSM-IV MINI | a) No COI declaration<br>b) No funding acknowledgement                                                                                                   |
| 16<br>17<br>18<br>19<br>20<br>21<br>22<br>23<br>24<br>25<br>26<br>27                                                             | Inagaki et al. (2013)   | Country: Japan<br><br>Setting: General hospital<br><br>Age whole sample (yrs): M = 73.5 (SD = 12.3)<br><br>Female: 59.3%   | N = 104 out of 511 received MINI<br><br>Depressed: 7.4% | Administration: Researcher administered<br><br>Language: Japanese | DSM-IV MINI | a) COI declaration: ‘The authors declare that they have no competing interests.’<br><br>b) Funding acknowledged (academic /health research institutions) |
| 28<br>29<br>30<br>31<br>32<br>33<br>34<br>35<br>36<br>37<br>38<br>39<br>40<br>41<br>42<br>43<br>44<br>45<br>46<br>47<br>48<br>49 | Khamseh et al. (2011)   | Country: Iran<br><br>Setting: Diabetes clinic<br><br>Age (yrs): M = 56.17 (SD = 9.60)<br><br>Female: 51.9%                 | N = 185<br><br>Depressed: 43.2%                         | Administration: Self report<br><br>Language: Persian              | DSM-IV SCID | a) COI declaration: The authors declared no competing interests<br>b) Funding acknowledged (academic /health research institutions)                      |

1  
2  
3  
4  
5  
6  
7  
8  
9  
10  
11  
12  
13  
14  
15  
16  
17  
18  
19  
20  
21  
22  
23  
24  
25  
26  
27  
28  
29  
30  
31  
32  
33  
34  
35  
36  
37  
38  
39  
40  
41  
42  
43  
44  
45  
46  
47  
48  
49

|                        |                                                                                                                                    |                                                    |                                                       |                |                                                                                                              |
|------------------------|------------------------------------------------------------------------------------------------------------------------------------|----------------------------------------------------|-------------------------------------------------------|----------------|--------------------------------------------------------------------------------------------------------------|
| Lamers et al. (2008)   | Country:<br>Netherlands<br><br>Setting: Primary care (elderly)<br><br>Age (yrs): M = 71.4 (SD = 6.90)<br><br>Female: 48.2%         | N = 713<br><br>Depressed: 10.7%                    | Administration:<br>Self report<br><br>Language: Dutch | DSM-IV<br>MINI | a) No COI declaration<br>b) Funding acknowledged (academic /health research institutions)                    |
| Lotrakul et al. (2008) | Country:<br>Thailand<br><br>Setting: Primary care<br><br>Age (yrs): M = 45.0 (SD = 14.30)<br><br>Female: 73.7%                     | N = 279<br><br>Depressed: 6.8%                     | Administration:<br>Self report<br><br>Language: Thai  | DSM-IV<br>MINI | a) No COI declaration<br>b) Funding acknowledged (academic /health research institutions)                    |
| Persoons et al. (2003) | Country:<br>Belgium<br><br>Setting: Hospital (otolaryngology patients)<br><br>Age (yrs): M = 48.2 (SD = 12.9)<br><br>Female: 65.6% | N = 268 (97 received MINI)<br><br>Depressed: 16.5% | Administration:<br>Self-report<br><br>Language: Dutch | DSM-IV<br>MINI | a) No COI declaration<br>b) Funding acknowledged (academic /health research institutions) and Pfizer Belgium |

|                        |                                                                                                                                      |                                |                                                      |                |                                                                                                                                                                                                        |
|------------------------|--------------------------------------------------------------------------------------------------------------------------------------|--------------------------------|------------------------------------------------------|----------------|--------------------------------------------------------------------------------------------------------------------------------------------------------------------------------------------------------|
| Picardi et al. (2005)  | Country: Italy<br><br>Setting: Hospital (dermatology inpatients)<br><br>Age (yrs): M = 37.5<br><br>Female: 56%                       | N = 141<br><br>Depressed: 8.5% | Administration: Self-report<br><br>Language: Italian | DSM-IV<br>SCID | a) No COI declaration<br>b) Funding acknowledged (academic /health research institutions). Acknowledged Pfizer Italia SRL for providing the Italian version of the PHQ-9 and for permission to use it. |
| Stafford et al. (2007) | Country: Australia<br><br>Setting: Hospital (cardiology patients)<br><br>Age (yrs): M = 64.1 (SD = 10.3)<br><br>Female: 66%          | N = 193<br><br>Depressed: 18%  | Administration: Self-report<br><br>Language: English | DSM-IV<br>MINI | a) No COI declaration<br>b) Funding acknowledged (academic/health research institutions)                                                                                                               |
| Thombs et al. (2008)   | Country: US<br><br>Setting: Hospital (outpatients with coronary heart disease)<br><br>Age (yrs): M = 67 (SD = 11)<br><br>Female: 18% | N = 1024<br><br>Depressed: 22% | Administration: Not stated<br><br>Language: English  | DSM<br>C-DIS   | a) COI declaration "None disclosed"<br>b) Funding acknowledged (academic/health research institutions)                                                                                                 |



1  
2  
3  
4  
5  
6  
7  
8  
9  
10  
11  
12  
13  
14  
15  
16  
17  
18  
19  
20  
21  
22  
23  
24  
25  
26  
27  
28  
29  
30  
31  
32  
33  
34  
35  
36  
37  
38  
39  
40  
41  
42  
43  
44  
45  
46  
47  
48  
49

|                        |                                                                                                                  |                               |                                                            |             |                                                                                                            |
|------------------------|------------------------------------------------------------------------------------------------------------------|-------------------------------|------------------------------------------------------------|-------------|------------------------------------------------------------------------------------------------------------|
| Thompson et al. (2010) | Country: US<br><br>Setting: Patients with Parkinson Disease<br><br>Age (yrs): 72.5 (SD = 9.6)<br><br>Female: 42% | N = 214<br><br>Depressed: 14% | Administration: Self administered<br><br>Language: English | DSM-IV SCID | a) No COI declaration<br>b) Funding acknowledged (academic/health research institutions)                   |
| Turner et al. (2012)   | Country: Australia<br><br>Setting: Stroke patients<br><br>Age (yrs): 66.7 (SD = 13.1)<br><br>Female: 47.2%       | N = 72<br><br>Depressed: 18%  | Administration: Self administered<br><br>Language: English | DSM-IV SCID | a) COI declaration: Disclosures 'None'.<br>b) Funding acknowledged (academic/health research institutions) |

|                                  |                                                                                                                       |                             |                                                             |                |                                                                                                                                                                                                               |
|----------------------------------|-----------------------------------------------------------------------------------------------------------------------|-----------------------------|-------------------------------------------------------------|----------------|---------------------------------------------------------------------------------------------------------------------------------------------------------------------------------------------------------------|
| van Steenberg-Weijnenburg (2010) | Country:<br>Netherlands<br><br>Setting: Diabetes patients<br><br>Age (yrs): M = 61.8 (SD = 13.6)<br><br>Female: 48.7% | N = 197<br>Depressed: 18.8% | Administration:<br>Self administered<br><br>Language: Dutch | DSM-IV<br>SCID | a) COI declaration: 'The authors declare that they have no competing interests'.<br>b) Funding acknowledged (academic/health research institutions) - 'this had no influence on the content of this article'. |
| Zuithoff et al. (2010)           | Country:<br>Netherlands<br><br>Setting: Primary care<br><br>Age (yrs): M = 51 (sd = 16.7)<br><br>Female: 63%          | N = 1338<br>Depressed: 13%  | Administration:<br>Self-report<br><br>Language: Dutch       | DSM-IV<br>CIDI | a) COI declaration 'The authors declare that they have no competing interests.'<br>b) Funding acknowledged (academic/health research institutions).                                                           |

**Table 2: Descriptive characteristics of the summed items scoring method studies cut-off point 10 (Moriarty et al, 2015)**

| Study                           | Sample characteristics                                                                                                                     | Sample size and % MDD                                                          | PHQ-9 characteristics                                                         | Diagnostic standard | Conflict of interest (COI) declaration<br>Funding<br>c) Relationship with original developers              |
|---------------------------------|--------------------------------------------------------------------------------------------------------------------------------------------|--------------------------------------------------------------------------------|-------------------------------------------------------------------------------|---------------------|------------------------------------------------------------------------------------------------------------|
| 13. Gräfe et al. (2004)         | Country: Germany<br><br>Setting: psychosomatic walk-in clinics and family practices<br><br>Mean age: 41.9 (SD = 13.8)<br><br>Female: 67.8% | N = 528<br><br>Depressed: 29.2% psychosomatic patients; 6.16% medical patients | Administration: self-report<br><br>Language: German<br><br>Cut-offs: 10 to 14 | DSM-IV SCID         | No COI declaration<br>Acknowledged funding from Pfizer<br>Not acknowledged                                 |
| 16. Kroenke et al. (2001)       | Country: USA<br><br>Setting: Primary care<br><br>Mean age: 46 (SD=17)<br><br>Female: 66%                                                   | N = 580<br><br>7.1% MDD                                                        | Administration: Self-report<br><br>Language: English<br><br>Cut-offs: 9 to 15 | DSM-IV SCID         | a) No COI declaration<br>b) Acknowledged funding from Pfizer<br>c) N/A                                     |
| 22. Navinés et al. (2012)       | Country: Spain<br><br>Setting: General hospital (patients with chronic HCV)<br><br>Mean age: 43.4 (SD = 10.2)<br><br>Female: 28.6%         | N = 500<br><br>6.4% MDD                                                        | Administration: Self-report<br><br>Language: Spanish<br><br>Cut-offs: 10      | DSM-IV SCID         | a) All authors declared that they had no COI.<br>b) Role of funding source declared<br>c) Not acknowledged |
| 29. Thekkumpurath et al. (2010) | Country: UK<br><br>Setting: Hospital (cancer patients)<br><br>Mean age: 61<br><br>Female: 63%                                              | N = 782<br><br>6.3% MDD (of the whole sample)                                  | Administration: Not stated<br><br>Language: English<br><br>Cut-offs: 5 to 10  | DSM-IV SCID         | c) COI declaration: 'Supported by Cancer Research UK'<br>d) As in a)<br>e) Not acknowledged                |
| 33. Williams et al. (2005)      | Country: USA                                                                                                                               | N = 316                                                                        | Administration: Unclear                                                       | DSM-IV SCID         | a) No COI declaration<br>b) Funding                                                                        |

563

|                          |                                                                                              |                      |                                                                         |                |                                                                                           |
|--------------------------|----------------------------------------------------------------------------------------------|----------------------|-------------------------------------------------------------------------|----------------|-------------------------------------------------------------------------------------------|
|                          | Setting: Secondary care (Post-stroke)<br>Mean age: Unclear<br>Female: Unclear                | 33.5% MDD            | Language: English<br>Cut-offs: 10                                       |                | acknowledged (academic institutions)<br>c) Not acknowledged                               |
| 1. Adewuya et al. (2006) | Country: Nigeria<br>Setting: community (students)<br>Mean age: 24.8 (15-40)<br>Female: 41.2% | N = 512<br>2.5% MDD  | Administration: Self-report<br>Language: English<br>Cut-offs: 8 to 12   | DSM-IV<br>MINI | a) No COI declaration<br>b) No funding declaration                                        |
| 2. Arroll et al. (2010)  | Country: New Zealand<br>Setting: Primary care<br>Mean age: 49 (17-99)<br>Female: 61%         | N = 2642<br>6.2% MDD | Administration: Not stated<br>Language: English<br>Cut-offs: 8,10,12,15 | DSM-IV<br>SCID | a) No COI declaration<br>b) Funding acknowledged (academic /health research institutions) |
| 3. Azah et al. (2005)    | Country: Malaysia<br>Setting: Primary care<br>Mean age: 38.7 (18-79)<br>Female: 61.7%        | N = 180<br>16.6% MDD | Administration: Self-report<br>Language: Malay<br>Cut-offs: 5 to 12     | DSM-IV<br>CIDI | b) No COI declaration<br>c) Funding acknowledged (academic /health research institutions) |
| 4. Chagas et al. (2013)  | Country: Brazil                                                                              | N = 84               | Administration: self-report                                             | DSM-IV<br>SCID | a) COI declaration "None declared"                                                        |

|                                 |                                                                               |                       |                                                                                             |             |                                                                                                                                                                                                                                                                                                                                           |
|---------------------------------|-------------------------------------------------------------------------------|-----------------------|---------------------------------------------------------------------------------------------|-------------|-------------------------------------------------------------------------------------------------------------------------------------------------------------------------------------------------------------------------------------------------------------------------------------------------------------------------------------------|
|                                 | Setting: Secondary care<br>Mean age: Not stated<br>Female: 52.7%              | 25.5% MDD             | Language: Brazilian<br>Cut-offs: 7 to 10                                                    |             | b) Funding acknowledged (academic/health research institutions)                                                                                                                                                                                                                                                                           |
| 6. de Lima Osorio et al. (2009) | Country: Brazil<br>Setting: Primary care<br>Mean age: Unclear<br>Female: 100% | N = 177<br>34% MDD    | Administration: research assistants<br>Language: Brazilian Portuguese<br>Cut-offs: 10 to 15 | DSM-IV SCID | a) No COI declaration<br>b) Funding acknowledged (academic institutions)                                                                                                                                                                                                                                                                  |
| 7. Elderon et al. (2011)        | Country: USA<br>Setting: Secondary care<br>Mean age: Unclear<br>Female: 18%   | N = 1022<br>18.3% MDD | Administration: self-report<br>Language: English<br>Cut-offs: 10                            | C-DIS       | a) COI declaration – ‘No disclosures’<br>b) Funding acknowledged (academic institutions and industry – AHA Pharmaceuticals Roundtable) – ‘The funding organisations had no role in the design or conduct of the study, collection, management, analysis or interpretation of data; or preparation, review or approval of the manuscript.’ |
| 8. Fann et al. (2005)           | Country: US<br>Setting: Trauma hospital (inpatients with traumatic            | N = 135<br>16.3% MDD  | Administration: Telephone-administered<br>Language: English                                 | DSM-IV SCID | b) No COI declaration<br>c) Funding acknowledged (academic                                                                                                                                                                                                                                                                                |

|                          |                                                                                                         |                      |                                                                                      |                  |                                                                                                                                                                                                                                                                                                                                           |
|--------------------------|---------------------------------------------------------------------------------------------------------|----------------------|--------------------------------------------------------------------------------------|------------------|-------------------------------------------------------------------------------------------------------------------------------------------------------------------------------------------------------------------------------------------------------------------------------------------------------------------------------------------|
|                          | brain injury)<br>Mean age: 42 (SD=17.9)<br>Female: 29.1%                                                |                      | Cut-offs: 10                                                                         |                  | institutions)                                                                                                                                                                                                                                                                                                                             |
| 9. Fine et al. (2013)    | Country: USA<br>Setting: Primary care (Ohio Army National Guard)<br>Mean age: 31 (17-60)<br>Female: 12% | N = 498<br>21.5% MDD | Administration:<br>Telephone-administered<br>Language: English<br>Cut-offs: 10,15    | DSM-IV<br>SCID-I | a) COI – last author disclosed financial and consulting interests (Pfizer not one of them). All other authors declared that they have no COI.<br>b) Funding acknowledged – DoD Medical Research. ‘The sponsor had no role in study design, data collection, analysis, interpretation of results, report writing or manuscript submission. |
| 10. Gelaye et al. (2013) | Country: Ethiopia<br>Setting: General hospital<br>Mean age: 34.9 (SD=11.6)<br>Female: 63.1 %            | N = 363<br>12.6% MDD | Administration:<br>Researcher-administered<br>Language: Amharic<br>Cut-offs: 9 to 11 | DSM-IV<br>SCAN   | c) No COI declaration<br>d) Funding acknowledged (academic /health research institutions)                                                                                                                                                                                                                                                 |
| 11. Gilbody et al.       | Country: UK                                                                                             | N = 96               | Administration: Not                                                                  | DSM-IV           | a) COI declaration –                                                                                                                                                                                                                                                                                                                      |

|                              |                                                                                                           |                      |                                                                                 |                |                                                                                                                                                                                               |
|------------------------------|-----------------------------------------------------------------------------------------------------------|----------------------|---------------------------------------------------------------------------------|----------------|-----------------------------------------------------------------------------------------------------------------------------------------------------------------------------------------------|
| (2007)                       | Setting: Primary care<br>Mean age: 42.5 (SD 13.6)<br>Female: 77%                                          | 37.5 MDD             | stated<br>Language: English<br>Cut-offs: 9 to 13                                | SCID           | last author involved in the development of one of the instruments (CORE-OM), 'but does not gain financially from its use.<br>b) Funding acknowledged (academic /health research institutions) |
| 12. Gjerdingen et al. (2009) | Country: USA<br>Setting: Community<br>Mean age: 29.3<br>Female: 100%                                      | N = 438<br>4.6% MDD  | Administration: Telephone or self-report<br>Language: English<br>Cut-offs: 10   | DSM-IV<br>SCID | c) No COI declaration<br>d) Funding acknowledged (academic /health research institutions)                                                                                                     |
| 14. Hyphantis et al. (2011)  | Country: Greece<br>Setting: Hospital – rheumatology patients<br>Mean age: 54.2 (SD = 13.5)<br>Female: 74% | N = 213<br>32.4% MDD | Administration: Researcher administered<br>Language: Greek<br>Cut-offs: 4 to 16 | DSM-IV<br>MINI | c) No COI declaration<br>d) No funding acknowledgement                                                                                                                                        |
| 15. Khamseh et al. (2011)    | Country: Iran<br>Setting: Outpatient diabetic clinic<br>Mean age: 56.1 (SD=9.6)                           | N = 185<br>43.2% MDD | Administration: Self-report<br>Language: Persian<br>Cut-offs: 10,13             | DSM-IV<br>SCID | c) COI declaration: The authors declared no competing interests<br>d) Funding acknowledged (academic /health                                                                                  |

|                            |                                                                                                                              |                                 |                                                                                                       |             |                                                                                                                                                                                    |
|----------------------------|------------------------------------------------------------------------------------------------------------------------------|---------------------------------|-------------------------------------------------------------------------------------------------------|-------------|------------------------------------------------------------------------------------------------------------------------------------------------------------------------------------|
|                            |                                                                                                                              |                                 |                                                                                                       |             | research institutions)                                                                                                                                                             |
| 19. Liu et al. (2011)      | <p>Female: 51.8%</p> <p>Country: Taiwan</p> <p>Setting: Primary care</p> <p>Mean age: Not specified</p> <p>Female: 60.9%</p> | <p>N = 1532</p> <p>3.3% MDD</p> | <p>Administration: Self-report</p> <p>Language: Chinese version</p> <p>Cut-offs: 9 to 11</p>          | SCAN        | <p>a) a) No COI declaration</p> <p>b) Funding acknowledged (academic /health research institutions)</p>                                                                            |
| 20. Lotrakul et al. (2008) | <p>Country: Thailand</p> <p>Setting: Primary care</p> <p>Mean age: 45.0 (SD = 14.30)</p> <p>Female: 73.7%</p>                | <p>N = 279</p> <p>6.8% MDD</p>  | <p>Administration: Self report</p> <p>Language: Thai</p> <p>Cut-offs: 7 to 15</p>                     | DSM-IV MINI | <p>c) No COI declaration</p> <p>d) Funding acknowledged (academic /health research institutions)</p>                                                                               |
| 23. Patel et al. (2008)    | <p>Country: India</p> <p>Setting: Primary care</p> <p>Mean age: 37.5 (18-83)</p> <p>Female: 56.4%</p>                        | <p>N = 299</p> <p>4.3% MDD</p>  | <p>Administration: Face-to-face interview</p> <p>Language: Not specified</p> <p>Cut-offs: 7 to 15</p> | CIS-R       | <p>a) COI declaration – No Declaration of Interest</p> <p>b) Funding acknowledged (academic /health research institutions)</p>                                                     |
| 24. Phelan et al. (2010)   | <p>Country: USA</p> <p>Setting: Primary care (elderly)</p> <p>Mean age: 78 (SD=7)</p> <p>Female: 62%</p>                     | <p>N = 71</p> <p>12% MDD</p>    | <p>Administration: Research assistant</p> <p>Language: English</p> <p>Cut-offs: 8 to 12</p>           | DSM-IV SCID | <p>a) COI declaration – No competing interests</p> <p>b) Funding acknowledged (academic /health research institutions) . ‘The funder had no role in the study design, methods,</p> |



|                              |                                                                                              |                      |                                                                       |                |                                                                                                                                                              |
|------------------------------|----------------------------------------------------------------------------------------------|----------------------|-----------------------------------------------------------------------|----------------|--------------------------------------------------------------------------------------------------------------------------------------------------------------|
|                              |                                                                                              |                      |                                                                       |                | data collection, analysis or interpretation of data, nor any role in the preparation of the manuscript or decision to submit the manuscript for publication. |
| 25. Rooney et al. (2013)     | Country: UK<br>Setting: Secondary care (glioma)<br>Mean age: 54.2 (SD=12.3)<br>Female: 42.6% | N = 129<br>13.5% MDD | Administration: Self-report<br>Language: English<br>Cut-offs: 8 to 11 | DSM-IV<br>SCID | a) COI declaration "The authors declare that they have no COI"<br>b) Funding acknowledged (academic/health research institutions)                            |
| 26. Sherina et al. (2012)    | Country: Malaysia<br>Setting: Primary care<br>Mean age: 30.9 (18-81)<br>Female: 100%         | N= 146<br>21.2% MDD  | Administration: Self-report<br>Language: Malay<br>Cut-offs: 10        | CIDI           | a) COI declaration "The authors declare that they have no competing interests"<br>b) Funding acknowledged (academic/health research institutions)            |
| 27. Sidebottom et al. (2012) | Country: USA<br>Setting: Community (prenatal)<br>Mean age: 23 (SD=5.5)<br>Female: 100%       | N = 745<br>3.6% MDD  | Administration: Interview<br>Language: English<br>Cut-offs: 10        | DSM-IV<br>SCID | b) COI declaration "The authors declare that they have no financial COI"<br>b) Funding acknowledged (academic/health research institutions)                  |
| 28. Stafford et al. (2007)   | Country: Australia<br>Setting: Secondary care (cardiac procedures)                           | N = 193<br>18.1% MDD | Administration: Self-report<br>Language: English                      | DSM-IV<br>MINI | b) No COI declaration<br>c) Funding acknowledged (academic/health                                                                                            |

|                            |                                                                                                                     |                      |                                                                               |              |                                                                                                                                                      |
|----------------------------|---------------------------------------------------------------------------------------------------------------------|----------------------|-------------------------------------------------------------------------------|--------------|------------------------------------------------------------------------------------------------------------------------------------------------------|
|                            | Mean age: 64.14 (38-91)<br>Female: 19.2%                                                                            |                      | Cut-offs: 10                                                                  |              | research institutions)                                                                                                                               |
| 30. Thombs et al. (2008)   | Country: US<br>Setting: Hospital (outpatients with coronary heart disease)<br>Mean age: 67 (SD = 11)<br>Female: 18% | N = 1024<br>22% MDD  | Administration: Not stated<br>Language: English<br>Cut-offs: 7 to 10          | DSM C-DIS    | b) COI declaration "None disclosed"<br>b) Funding acknowledged (academic/health research institutions)                                               |
| 32. Watnick et al. (2005)  | Country: USA<br>Setting: Secondary care (dialysis)<br>Mean age: 63 (SD=15)<br>Female: 32.3%                         | N = 62<br>19% MDD    | Administration: Self-report<br>Language: English<br>Cut-offs: 10              | DSM-IV SCID  | b) No COI declaration<br>c) Funding acknowledged (academic/health research institutions)                                                             |
| 34. Wittkamp et al. (2009) | Country: Netherlands<br>Setting: Primary care<br>Mean age: 49.8<br>Female: 66.7%                                    | N = 664<br>12.3% MDD | Administration: Self-report<br>Language: Not specified<br>Cut-offs: 10 and 15 | DSM-IV SCIDI | No COI declaration<br>b) Funding acknowledged (academic/health research institutions)                                                                |
| 35. Zhang et al. (2013)    | Country: Hong Kong<br>Setting: Secondary care (diabetic outpatients)<br>Mean age: 55.1 (SD=9.5)                     | N = 99<br>23.2% MDD  | Administration: Self-report<br>Language: Chinese version<br>Cut-offs: 15      | DSM-IV MINI  | COI declaration – last author acknowledged financial COI. The other authors declare that they have no competing interests.<br>) Funding acknowledged |

|                            |                                                                                               |                                |                                                    |                |                                                                                                                                                       |
|----------------------------|-----------------------------------------------------------------------------------------------|--------------------------------|----------------------------------------------------|----------------|-------------------------------------------------------------------------------------------------------------------------------------------------------|
|                            | Female: 40.8%                                                                                 |                                |                                                    |                | (academic/health research institutions)                                                                                                               |
| 36. Zuithoff et al. (2010) | Country: Netherlands<br>Setting: Primary care<br>Age (yrs): M = 51 (sd = 16.7)<br>Female: 63% | N = 1338<br><br>Depressed: 13% | Administration: Self-report<br><br>Language: Dutch | DSM-IV<br>CIDI | b) COI declaration<br>"The authors declare that they have no competing interests."<br>b) Funding acknowledged (academic/health research institutions) |

564  
565

**Table 3: Quality assessment of included studies in the algorithm meta-analysis (Manea et al., 2014)**

| Study                      | Patient selection:           | Patient selection:                                         | Patient selection:               | Patient selection:   | Index test:                               | Index test:                            | Index test:                                     | Index test:          |
|----------------------------|------------------------------|------------------------------------------------------------|----------------------------------|----------------------|-------------------------------------------|----------------------------------------|-------------------------------------------------|----------------------|
|                            | Consecutive or random sample | Avoid case-control / avoid artificially inflated base rate | Avoided inappropriate exclusions | Overall risk of bias | PHQ-9 interpreted blind to reference test | If translated, appropriate translation | If translated, psychometric properties reported | Overall risk of bias |
| <b>Allegiant studies</b>   |                              |                                                            |                                  |                      |                                           |                                        |                                                 |                      |
| Diez-Quevedo et al. (2001) | ✗                            | ✓                                                          | ✗                                | High                 | ?                                         | ✓                                      | ✓                                               | Unclear              |
| Gräfe et al. (2004)        | ✓                            | ✓                                                          | ✓                                | Low                  | ?                                         | ✓                                      | ✓                                               | Unclear              |

|    |                              |   |   |   |         |   |     |     |         |
|----|------------------------------|---|---|---|---------|---|-----|-----|---------|
| 1  |                              |   |   |   |         |   |     |     |         |
| 2  |                              |   |   |   |         |   |     |     |         |
| 3  |                              |   |   |   |         |   |     |     |         |
| 4  |                              |   |   |   |         |   |     |     |         |
| 5  | Lowe et al.                  | ✘ | ✓ | ✓ | High    | ✓ | ✓   | ✓   | Low     |
| 6  | (2004)                       |   |   |   |         |   |     |     |         |
| 7  |                              |   |   |   |         |   |     |     |         |
| 8  | Muramatsu et                 | ? | ✓ | ? | Unclear | ✓ | ✓   | ?   | Unclear |
| 9  | al. (2007)                   |   |   |   |         |   |     |     |         |
| 10 |                              |   |   |   |         |   |     |     |         |
| 11 | Navines et al.               | ✓ | ✓ | ✓ | Low     | ✓ | ✓   | ?   | Unclear |
| 12 | (2012)                       |   |   |   |         |   |     |     |         |
| 13 |                              |   |   |   |         |   |     |     |         |
| 14 | Spitzer et al.               | ✘ | ✓ | ✓ | High    | ✓ | n/a | n/a | Low     |
| 15 | (1999)                       |   |   |   |         |   |     |     |         |
| 16 |                              |   |   |   |         |   |     |     |         |
| 17 | Thekkumpurath                | ✘ | ✘ | ✓ | High    | ✓ | n/a | n/a | Low     |
| 18 | et al. (2010)                |   |   |   |         |   |     |     |         |
| 19 |                              |   |   |   |         |   |     |     |         |
| 20 |                              |   |   |   |         |   |     |     |         |
| 21 | <b>Non-allegiant studies</b> |   |   |   |         |   |     |     |         |
| 22 |                              |   |   |   |         |   |     |     |         |
| 23 | Arroll et al.                | ✓ | ✓ | ✓ | Low     | ✓ | n/a | n/a | Low     |
| 24 | (2010)                       |   |   |   |         |   |     |     |         |
| 25 |                              |   |   |   |         |   |     |     |         |
| 26 | Ayalon et al. (              | ? | ✓ | ✓ | Unclear | ? | ✓   | ?   | Unclear |
| 27 | 2010)                        |   |   |   |         |   |     |     |         |
| 28 |                              |   |   |   |         |   |     |     |         |
| 29 | Eack et al.                  | ? | ✓ | ? | Unclear | ? | n/a | n/a | Unclear |
| 30 | (2006)                       |   |   |   |         |   |     |     |         |
| 31 |                              |   |   |   |         |   |     |     |         |
| 32 | Fann et al.                  | ✓ | ✘ | ✘ | High    | ✓ | n/a | n/a | Low     |
| 33 | (2005)                       |   |   |   |         |   |     |     |         |
| 34 |                              |   |   |   |         |   |     |     |         |
| 35 | Gelaye et al.                | ? | ✘ | ? | High    | ✓ | ✓   | ?   | Unclear |
| 36 | (2013)                       |   |   |   |         |   |     |     |         |
| 37 |                              |   |   |   |         |   |     |     |         |
| 38 | Gjerdingen et                | ✓ | ✓ | ✓ | Low     | ? | n/a | n/a | Unclear |
| 39 |                              |   |   |   |         |   |     |     |         |
| 40 |                              |   |   |   |         |   |     |     |         |
| 41 |                              |   |   |   |         |   |     |     |         |
| 42 |                              |   |   |   |         |   |     |     |         |
| 43 |                              |   |   |   |         |   |     |     |         |
| 44 |                              |   |   |   |         |   |     |     |         |
| 45 |                              |   |   |   |         |   |     |     |         |
| 46 |                              |   |   |   |         |   |     |     |         |
| 47 |                              |   |   |   |         |   |     |     |         |
| 48 |                              |   |   |   |         |   |     |     |         |
| 49 |                              |   |   |   |         |   |     |     |         |

|    |                  |   |   |   |         |   |     |     |         |
|----|------------------|---|---|---|---------|---|-----|-----|---------|
| 1  |                  |   |   |   |         |   |     |     |         |
| 2  |                  |   |   |   |         |   |     |     |         |
| 3  |                  |   |   |   |         |   |     |     |         |
| 4  |                  |   |   |   |         |   |     |     |         |
| 5  | al. (2009)       |   |   |   |         |   |     |     |         |
| 6  |                  |   |   |   |         |   |     |     |         |
| 7  | Henkel et al.    | ✓ | ✓ | ✓ | Low     | ? | n/a | n/a | Unclear |
| 8  | (2004)           |   |   |   |         |   |     |     |         |
| 9  |                  |   |   |   |         |   |     |     |         |
| 10 | Hyphantis et al. | ✓ | ✓ | ✗ | High    | ✓ | ?   | ?   | Unclear |
| 11 | (2011)           |   |   |   |         |   |     |     |         |
| 12 |                  |   |   |   |         |   |     |     |         |
| 13 | Inagaki et al.   | ✓ | ✗ | ✓ | High    | ✓ | ?   | ?   | Unclear |
| 14 | (2013)           |   |   |   |         |   |     |     |         |
| 15 |                  |   |   |   |         |   |     |     |         |
| 16 | Khamseh et al.   | ✓ | ✓ | ? | Unclear | ✓ | ✓   | ?   | Unclear |
| 17 | (2011)           |   |   |   |         |   |     |     |         |
| 18 |                  |   |   |   |         |   |     |     |         |
| 19 | Lamers et al     | ✓ | ✗ | ✗ | High    | ✓ | ?   | ?   | Unclear |
| 20 | (2008)           |   |   |   |         |   |     |     |         |
| 21 |                  |   |   |   |         |   |     |     |         |
| 22 | Lotrakul et al.  | ✗ | ✓ | ? | High    | ✓ | ✓   | ?   | Unclear |
| 23 | (2008)           |   |   |   |         |   |     |     |         |
| 24 |                  |   |   |   |         |   |     |     |         |
| 25 | Persoons et al.  | ✓ | ✓ | ✓ | Low     | ✓ | ✓   | n/a | Low     |
| 26 | (2003)           |   |   |   |         |   |     |     |         |
| 27 |                  |   |   |   |         |   |     |     |         |
| 28 | Picardi et al.   | ✓ | ✓ | ✓ | Low     | ✓ | ?   | ?   | Unclear |
| 29 | (2005)           |   |   |   |         |   |     |     |         |
| 30 |                  |   |   |   |         |   |     |     |         |
| 31 | Stafford et al.  | ✓ | ✓ | ✓ | Low     | ✓ | n/a | n/a | Low     |
| 32 | (2007)           |   |   |   |         |   |     |     |         |
| 33 |                  |   |   |   |         |   |     |     |         |
| 34 | Thombs et al.    | ✗ | ✓ | ? | Unclear | ? | n/a | n/a | Unclear |
| 35 | (2008)           |   |   |   |         |   |     |     |         |
| 36 |                  |   |   |   |         |   |     |     |         |
| 37 | Thomson et       | ? | ✓ | ✓ | Unclear | ? | n/a | n/a | Unclear |
| 38 |                  |   |   |   |         |   |     |     |         |
| 39 |                  |   |   |   |         |   |     |     |         |
| 40 |                  |   |   |   |         |   |     |     |         |
| 41 |                  |   |   |   |         |   |     |     |         |
| 42 |                  |   |   |   |         |   |     |     |         |
| 43 |                  |   |   |   |         |   |     |     |         |
| 44 |                  |   |   |   |         |   |     |     |         |
| 45 |                  |   |   |   |         |   |     |     |         |
| 46 |                  |   |   |   |         |   |     |     |         |
| 47 |                  |   |   |   |         |   |     |     |         |
| 48 |                  |   |   |   |         |   |     |     |         |
| 49 |                  |   |   |   |         |   |     |     |         |

|                                 |   |   |   |         |   |     |     |         |  |
|---------------------------------|---|---|---|---------|---|-----|-----|---------|--|
| al. (2011)                      |   |   |   |         |   |     |     |         |  |
| Turner et al. (2012)            | ✓ | ✓ | ✓ | Low     | ✓ | n/a | n/a | Low     |  |
| Van Steenberg-Wijnenburg (2010) | ? | ✓ | ✓ | Unclear | ? | ?   | ?   | Unclear |  |
| Zuithoff et al. (2010)          | ✓ | ✓ | ✓ | Low     | ✓ | ✓   | ?   | Unclear |  |

✓ = criterion met; ✗ = criterion not met; ? = insufficient information to code whether criterion met; n/a = not applicable

566

**Table 3: Quality assessment of included studies in the algorithm meta-analysis (Manea et al., 2014) (continued)**

| Study                      | Reference test:<br>Reference test correctly classifies target condition | Reference test:<br>Reference test interpreted blind to PHQ-9 | Reference test:<br>If translated, appropriate translation | Reference test:<br>If translated, psychometric properties reported | Reference test:<br>Overall risk of bias | Flow / timing:<br>Interval of two weeks or less | Flow / timing:<br>All participants receive same reference test | Flow / timing:<br>All participants included in analysis? | Flow / timing:<br>Overall risk of bias |
|----------------------------|-------------------------------------------------------------------------|--------------------------------------------------------------|-----------------------------------------------------------|--------------------------------------------------------------------|-----------------------------------------|-------------------------------------------------|----------------------------------------------------------------|----------------------------------------------------------|----------------------------------------|
| <b>Allegiant studies</b>   |                                                                         |                                                              |                                                           |                                                                    |                                         |                                                 |                                                                |                                                          |                                        |
| Diez-Quevedo et al. (2001) | ✓                                                                       | ✓                                                            | ✓                                                         | ?                                                                  | Unclear                                 | ✓                                               | ✓                                                              | ✓                                                        | Low                                    |

1  
2  
3  
4  
5  
6  
7  
8  
9  
10  
11  
12  
13  
14  
15  
16  
17  
18  
19  
20  
21  
22  
23  
24  
25  
26  
27  
28  
29  
30  
31  
32  
33  
34  
35  
36  
37  
38  
39  
40  
41  
42  
43  
44  
45  
46  
47  
48  
49

|                              |   |   |     |     |         |   |   |   |         |
|------------------------------|---|---|-----|-----|---------|---|---|---|---------|
| Gräfe et al. (2004)          | ✓ | ? | n/a | n/a | Unclear | ✓ | ✓ | ✓ | Low     |
| Lowe et al. (2004)           | ✓ | ✓ | n/a | n/a | Low     | ✓ | ✓ | ✓ | Low     |
| Muramatsu et al. (2007)      | ✓ | ✓ | ✓   | ✓   | Low     | ✓ | ✓ | ? | Unclear |
| Navines et al. (2012)        | ✓ | ✓ | ?   | ?   | Unclear | ✓ | ✓ | ✓ | Low     |
| Spitzer et al. (1999)        | ✓ | ✓ | n/a | n/a | Low     | ✓ | ✓ | ✗ | High    |
| Thekkumpurath et al. (2010)  | ✓ | ✓ | n/a | n/a | Low     | ? | ✓ | ✗ | High    |
| <b>Non-allegiant studies</b> |   |   |     |     |         |   |   |   |         |
| Arroll et al. (2010)         | ✓ | ✓ | n/a | n/a | Low     | ✓ | ✓ | ✓ | Low     |
| Ayalon et al. (2010)         | ✓ | ? | ✓   | ?   | Unclear | ? | ✓ | ✓ | Unclear |
| Eack et al. (2006)           | ✓ | ? | n/a | n/a | Unclear | ? | ✓ | ? | Unclear |
| Fann et al. (2005)           | ✓ | ? | n/a | n/a | Unclear | ✓ | ✓ | ✗ | High    |
| Gelaye et al.                | ✓ | ✓ | ✓   | ✓   | Low     | ✓ | ✓ | ✗ | High    |

For peer review only

(2013)

|                          |   |   |     |     |         |   |   |   |         |
|--------------------------|---|---|-----|-----|---------|---|---|---|---------|
| Gjerdingen et al. (2009) | ✓ | ? | n/a | n/a | Unclear | ✓ | ✓ | ✗ | High    |
| Henkel et al. (2004)     | ✓ | ? | n/a | n/a | Unclear | ✓ | ✓ | ✗ | High    |
| Hyphantis et al. (2011)  | ✓ | ✓ | ?   | ?   | Unclear | ✓ | ✓ | ✗ | High    |
| Inagaki et al. (2013)    | ✓ | ✓ | ✓   | ?   | Unclear | ✓ | ✓ | ✗ | High    |
| Khamseh et al. (2011)    | ✓ | ✓ | ✓   | ?   | Unclear | ✓ | ✓ | ? | Unclear |
| Lamers et al. (2008)     | ✓ | ✓ | ?   | ?   | Unclear | ? | ✓ | ✗ | High    |
| Lotrakul et al. (2008)   | ✓ | ✓ | ✓   | ✓   | Low     | ? | ✓ | ✗ | High    |
| Persoons et al. (2003)   | ✓ | ✓ | ?   | ?   | Unclear | ✓ | ✓ | ✓ | Low     |
| Picardi et al. (2005)    | ✓ | ✓ | ✓   | ?   | Unclear | ✓ | ✓ | ✗ | High    |
| Stafford et al. (2007)   | ✓ | ✓ | n/a | n/a | Low     | ✓ | ✓ | ✗ | High    |
| Thombs et al.            | ? | ✓ | n/a | n/a | Unclear | ✓ | ✓ | ✓ | Low     |



1  
2  
3  
4  
5  
6  
7  
8  
9  
10  
11  
12  
13  
14  
15  
16  
17  
18  
19  
20  
21  
22  
23  
24  
25  
26  
27  
28  
29  
30  
31  
32  
33  
34  
35  
36  
37  
38  
39  
40  
41  
42  
43  
44  
45  
46  
47  
48  
49

**Table 4: Quality assessment of included studies in the summed item scoring method cut-off point 10 meta-analysis (Moriarty et al., 2015)**

(2008)

|                                |   |   |     |     |         |   |   |   |         |
|--------------------------------|---|---|-----|-----|---------|---|---|---|---------|
| Thompson et al. (2011)         | ✓ | ? | n/a | n/a | Unclear | ✓ | ✓ | ✗ | High    |
| Turner et al. (2012)           | ✓ | ? | n/a | n/a | Unclear | ? | ✓ | ✗ | High    |
| Van Steenberg-Wijenburg (2010) | ✓ | ✗ | ?   | ?   | High    | ✓ | ✓ | ✗ | High    |
| Zuithoff et al. (2010)         | ✓ | ✓ | ?   | ?   | Unclear | ? | ✓ | ✓ | Unclear |

✓ = criterion met; ✗ = criterion not met; ? = insufficient information to code whether criterion met; n/a = not applicable

For peer review only

567  
568  
569  
570  
571  
572  
573  
574

| Study                           | Patient selection:           | Patient selection:                                         | Patient selection:               | Patient selection:   | Index test:                               | Index test:                    | Index test:                            | Index test:                                     | Index test:          |
|---------------------------------|------------------------------|------------------------------------------------------------|----------------------------------|----------------------|-------------------------------------------|--------------------------------|----------------------------------------|-------------------------------------------------|----------------------|
|                                 | Consecutive or random sample | Avoid case-control / avoid artificially inflated base rate | Avoided inappropriate exclusions | Overall risk of bias | PHQ-9 interpreted blind to reference test | Was a threshold pre-specified? | If translated, appropriate translation | If translated, psychometric properties reported | Overall risk of bias |
| <b>Allegiant studies</b>        |                              |                                                            |                                  |                      |                                           |                                |                                        |                                                 |                      |
| 13. Gräfe et al. (2004)         | ✓                            | ✓                                                          | ✓                                | Low                  | ?                                         | ✓                              | ✓                                      | ✓                                               | Unclear              |
| 16. Kroenke et al. (2011)       | ✓                            | ✓                                                          | ✓                                | Low                  | ✓                                         | ✓                              | n/a                                    | n/a                                             | Low                  |
| 22. Navinés et al. (2012)       | ✓                            | ✓                                                          | ✓                                | Low                  | ✓                                         | ✓                              | ✓                                      | ?                                               | Unclear              |
| 29. Thekkumpurath et al. (2010) | ✗                            | ✗                                                          | ✓                                | High                 | ✓                                         | ✓                              | n/a                                    | n/a                                             | Low                  |
| 33. Williams et al. (2005)      | ✓                            | ✓                                                          | ✓                                | Low                  | ?                                         | ✓                              | n/a                                    | n/a                                             | Unclear              |
| <b>Non-allegiant studies</b>    |                              |                                                            |                                  |                      |                                           |                                |                                        |                                                 |                      |
| 1. Adewuya et                   | ✓                            | ✓                                                          | ✗                                | Unclear              | ✓                                         | ✓                              | n/a                                    | n/a                                             | Low                  |

1  
2  
3  
4  
5  
6  
7  
8  
9  
10  
11  
12  
13  
14  
15  
16  
17  
18  
19  
20  
21  
22  
23  
24  
25  
26  
27  
28  
29  
30  
31  
32  
33  
34  
35  
36  
37  
38  
39  
40  
41  
42  
43  
44  
45  
46  
47  
48  
49

|                                 |   |   |   |         |   |   |     |     |         |  |
|---------------------------------|---|---|---|---------|---|---|-----|-----|---------|--|
| al. (2006)                      |   |   |   |         |   |   |     |     |         |  |
| 2. Arroll et al. (2010)         | ✓ | ✓ | ✓ | Low     | ✓ | ✓ | n/a | n/a | Low     |  |
| 3. Azah et al. (2005)           | ✓ | ✗ | ? | High    | ✓ | ✓ | ✓   | ✓   | Low     |  |
| 4. Chagas et al. (2013)         | ✓ | ✓ | ✓ | Low     | ✓ | ✓ | ✓   | ✓   | Low     |  |
| 6. de Lima Osorio et al. (2009) | ✓ | ✗ | ✓ | High    | ? | ✗ | n/a | n/a | High    |  |
| 7. Elderon et al. (2011)        | ✓ | ✓ | ✓ | Low     | ✓ | ✓ | n/a | n/a | Low     |  |
| 8. Fann et al. (2005)           | ✓ | ✗ | ✗ | High    | ✓ | ✓ | n/a | n/a | Low     |  |
| 9. Fine et al. (2013)           | ✓ | ✓ | ✓ | Low     | ? | ✓ | n/a | n/a | Unclear |  |
| 10. Gelaye et al. (2013)        | ? | ✗ | ? | High    | ✓ | ✗ | ✓   | ?   | High    |  |
| 11. Gilbody et al.              | ? | ✓ | ? | Unclear | ✓ | ✓ | n/a | n/a | Low     |  |

1  
2  
3  
4  
5 (2007)  
6  
7  
8 12. Gjerdingen et  
9 al. (2009) ✓ ✓ ✓ Low ? ✓ n/a n/a Unclear  
10  
11 14. Hyphantis et  
12 al. (2011) ✓ ✗ ✓ High ✓ ✓ ? ? Unclear  
13  
14 15. Khamseh et  
15 al. (2011) ✓ ✓ ? Unclear ✓ ✓ ✓ ? Unclear  
16  
17  
18 19. Liu et al.  
19 (2011) ✓ ✓ ? Unclear ✓ ✗ ✓ ? High  
20  
21  
22 20. Lotrakul et  
23 al. (2008) ✗ ✓ ? Unclear ✓ ✓ ✓ ? Unclear  
24  
25  
26 23. Patel et al.  
27 (2008) ✓ ✓ ✓ Low ✓ ✓ ? ? Unclear  
28  
29  
30 24. Phelan et al.  
31 (2010) ✗ ✓ ✓ High ✓ ✗ n/a n/a High  
32  
33  
34 25. Rooney et al.  
35 (2013) ✓ ✓ ✓ Low ? ✗ n/a n/a High  
36  
37  
38 26. Sherina et al. ✓ ✓ ✗ High ✓ ✓ ✓ ✓ Low  
39  
40  
41  
42  
43  
44  
45

|    |     |                 |   |   |   |         |   |   |     |     |         |
|----|-----|-----------------|---|---|---|---------|---|---|-----|-----|---------|
| 1  |     |                 |   |   |   |         |   |   |     |     |         |
| 2  |     |                 |   |   |   |         |   |   |     |     |         |
| 3  |     |                 |   |   |   |         |   |   |     |     |         |
| 4  |     |                 |   |   |   |         |   |   |     |     |         |
| 5  |     | (2012)          |   |   |   |         |   |   |     |     |         |
| 6  |     |                 |   |   |   |         |   |   |     |     |         |
| 7  |     |                 |   |   |   |         |   |   |     |     |         |
| 8  | 27. | Sidebottom      | ✓ | ✓ | ✓ | Low     | ✓ | ✓ | n/a | n/a | Low     |
| 9  |     | et al. (2012)   |   |   |   |         |   |   |     |     |         |
| 10 |     |                 |   |   |   |         |   |   |     |     |         |
| 11 | 28. | Stafford et al. | ✓ | ✓ | ✓ | Low     | ✓ | ✓ | n/a | n/a | Low     |
| 12 |     | (2007)          |   |   |   |         |   |   |     |     |         |
| 13 |     |                 |   |   |   |         |   |   |     |     |         |
| 14 | 30. | Thombs et       | ✗ | ✓ | ? | High    | ✓ | ? | n/a | n/a | Unclear |
| 15 |     | al. (2008)      |   |   |   |         |   |   |     |     |         |
| 16 |     |                 |   |   |   |         |   |   |     |     |         |
| 17 | 32. | Watnick et      | ? | ✗ | ✓ | High    | ✓ | ✓ | n/a | n/a | Low     |
| 18 |     | al. (2005)      |   |   |   |         |   |   |     |     |         |
| 19 |     |                 |   |   |   |         |   |   |     |     |         |
| 20 | 34. | Wittkamp        | ✓ | ✓ | ✓ | Low     | ✓ | ? | n/a | n/a | Unclear |
| 21 |     | et al. (2009)   |   |   |   |         |   |   |     |     |         |
| 22 |     |                 |   |   |   |         |   |   |     |     |         |
| 23 | 35. | Zhang et al.    | ✓ | ✓ | ? | Unclear | ? | ✓ | ?   | ?   | Unclear |
| 24 |     | (2013)          |   |   |   |         |   |   |     |     |         |
| 25 |     |                 |   |   |   |         |   |   |     |     |         |
| 26 | 36. | Zuithoff et     | ✓ | ✓ | ✓ | Low     | ✓ | ✓ | ✓   | ?   | Unclear |
| 27 |     | al. (2010)      |   |   |   |         |   |   |     |     |         |
| 28 |     |                 |   |   |   |         |   |   |     |     |         |
| 29 |     |                 |   |   |   |         |   |   |     |     |         |
| 30 | 575 |                 |   |   |   |         |   |   |     |     |         |
| 31 |     |                 |   |   |   |         |   |   |     |     |         |

**Table 4: Quality assessment of included studies in the summed item scoring method cut-off point 10 meta-analysis (Moriarty et al., 2015) (continued)**

| Study | Reference test: | Reference test: | Reference test: | Reference test:             | Reference test: | Flow / timing:  | Flow / timing:   | Flow / timing:   | Flow / timing:  |
|-------|-----------------|-----------------|-----------------|-----------------------------|-----------------|-----------------|------------------|------------------|-----------------|
|       | Reference test  | Reference test  | If translated,  | If translated, psychometric | Overall risk of | Interval of two | All participants | All participants | Overall risk of |

|                                       | correctly<br>classifies<br>target<br>condition | interpreted<br>blind to<br>PHQ-9 | appropriate<br>translation | properties<br>reported | bias    | weeks or<br>less | receive<br>same<br>reference<br>test | included in<br>analysis? | bias    |
|---------------------------------------|------------------------------------------------|----------------------------------|----------------------------|------------------------|---------|------------------|--------------------------------------|--------------------------|---------|
| <b>Allegiant studies</b>              |                                                |                                  |                            |                        |         |                  |                                      |                          |         |
| 13. Gräfe et al.<br>(2004)            | ✓                                              | ?                                | n/a                        | n/a                    | Unclear | ✓                | ✓                                    | ✓                        | Low     |
| 16. Kroenke et<br>al. (2011)          | ✓                                              | ✓                                | n/a                        | n/a                    | Low     | ✓                | ✓                                    | ✓                        | Low     |
| 22. Navinés et<br>al. (2012)          | ✓                                              | ✓                                | ?                          | ?                      | Unclear | ✓                | ✓                                    | ✓                        | Low     |
| 29.<br>Thekkumpurath<br>et al. (2010) | ✓                                              | ✓                                | n/a                        | n/a                    | Low     | ?                | ✓                                    | ✓                        | Unclear |
| 33. Williams et<br>al. (2005)         | ✓                                              | ?                                | n/a                        | n/a                    | Unclear | ?                | ✓                                    | ✓                        | Unclear |
| <b>Non-allegiant studies</b>          |                                                |                                  |                            |                        |         |                  |                                      |                          |         |
| 1. Adewuya et<br>al. (2006)           | ✓                                              | ✓                                | n/a                        | n/a                    | Low     | ✓                | ✓                                    | ✓                        | Low     |
| 2. Arroll et al.                      | ✓                                              | ✓                                | n/a                        | n/a                    | Low     | ?                | ✓                                    | ✓                        | Unclear |

1  
2  
3  
4  
5  
6  
7  
8  
9  
10  
11  
12  
13  
14  
15  
16  
17  
18  
19  
20  
21  
22  
23  
24  
25  
26  
27  
28  
29  
30  
31  
32  
33  
34  
35  
36  
37  
38  
39  
40  
41  
42  
43  
44  
45  
46  
47  
48  
49

(2010)

3. Azah et al.  
(2005)

✓ ✓ ✓ ✓ Low ✓ ✓ ✗ High

4. Chagas et al.  
(2013)

✓ ✓ ? ? Unclear ✓ ✓ ✗ High

6. de Lima  
Osorio et al.  
(2009)

✓ ? n/a n/a Unclear ? ✓ ✓ Unclear

7. Elderon et al.  
(2011)

✓ ✓ n/a n/a Low ✓ ✓ ✓ Low

8. Fann et al.  
(2005)

✓ ? n/a n/a Unclear ✓ ✓ ✗ High

9. Fine et al.  
(2013)

✓ ? n/a n/a Unclear ? ✓ ✓ Unclear

10. Gelaye et  
al. (2013)

✓ ✓ ✓ ✓ Low ✓ ✓ ✗ High

11. Gilbody et  
al. (2007)

✓ ✓ n/a n/a Low ? ✓ ✓ Unclear

12. Gjerdingen

✓ ? n/a n/a Unclear ✓ ✓ ✗ High

For peer review only

1  
2  
3  
4  
5 et al. (2009)  
6

7  
8 14. Hyphantis  
9 et al. (2011)

✓ ✓ ? ? Unclear ✓ ✓ ✗ High

10  
11 15. Khamseh et  
12 al. (2011)

✓ ✓ ✓ ? Unclear ✓ ✓ ? Unclear

13  
14  
15 19. Liu et al.  
16 (2011)

✓ ✓ ✓ ✓ Low ✓ ✓ ? Unclear

17  
18  
19 20. Lotrakul et  
20 al. (2008)

✓ ✓ ✓ ✓ Low ? ✓ ✗ High

21  
22  
23 23. Patel et al.  
24 (2008)

✓ ✓ ✓ ? Unclear ? ✓ ✗ High

25  
26  
27 24. Phelan et  
28 al. (2010)

✓ ✓ n/a n/a Low ✓ ✓ ✓ Low

29  
30  
31 25. Rooney et  
32 al. (2013)

✓ ? n/a n/a Unclear ? ✓ ✗ High

33  
34  
35 26. Sherina et  
36 al. (2012)

✓ ✓ ✓ ✓ Low ✓ ✓ ✓ Low

37  
38 27. Sidebottom  
39

✓ ✓ n/a n/a Low ✓ ✓ ✗ High



1  
2  
3  
4  
5  
6  
7  
8  
9  
10  
11  
12  
13  
14  
15  
16  
17  
18  
19  
20  
21  
22  
23  
24  
25  
26  
27  
28  
29  
30  
31  
32  
33  
34  
35  
36  
37  
38  
39  
40  
41  
42  
43  
44  
45  
46  
47  
48  
49

|                             |   |   |     |     |         |   |   |   |         |
|-----------------------------|---|---|-----|-----|---------|---|---|---|---------|
| et al. (2012)               |   |   |     |     |         |   |   |   |         |
| 28. Stafford et al. (2007)  | ✓ | ✓ | n/a | n/a | Low     | ✓ | ✓ | ✗ | High    |
| 30. Thombs et al. (2008)    | ? | ✓ | n/a | n/a | Unclear | ✓ | ✓ | ✓ | Low     |
| 32. Watnick et al. (2005)   | ✓ | ✓ | n/a | n/a | Low     | ✓ | ✓ | ✓ | Low     |
| 34. Wittkampf et al. (2009) | ✓ | ✓ | n/a | n/a | Low     | ? | ✓ | ✗ | High    |
| 35. Zhang et al. (2013)     | ✓ | ? | ✓   | ✓   | Unclear | ✗ | ✓ | ✗ | High    |
| 36. Zuithoff et al. (2010)  | ✓ | ✓ | ?   | ?   | Unclear | ? | ✓ | ✓ | Unclear |

576

577 **Table 5. Pooled estimates of diagnostic properties of the PHQ-9 at cut-off point 10 and using algorithm scoring method in the non-independent vs**  
578 **independent studies groups**

579

| Settings | No of studies | No of patients | Sensitivity (95% CI) | Specificity (95% CI) | Pooled positive likelihood ratio (95% CI) | Pooled negative likelihood ratio (95% CI) | Diagnostic odds ratio (95% CI) | Heterogeneity: I <sup>2</sup> |
|----------|---------------|----------------|----------------------|----------------------|-------------------------------------------|-------------------------------------------|--------------------------------|-------------------------------|
|----------|---------------|----------------|----------------------|----------------------|-------------------------------------------|-------------------------------------------|--------------------------------|-------------------------------|

|                                                     |    |        |                    |                    |                      |                    |                        |       |
|-----------------------------------------------------|----|--------|--------------------|--------------------|----------------------|--------------------|------------------------|-------|
| <b>Manea et al, 2014 SR – RA group</b>              | 7  | 4,065  | 0.77 (0.70 – 0.84) | 0.94 (0.90 – 0.97) | 14.97 (8.39 – 26.71) | 0.23 (0.17 - 0.31) | 64.40 (34.15 – 121.43) | 78.9% |
| <b>Manea et al, 2014 SR Independent studies</b>     | 21 | 9,900  | 0.48 (0.41 – 0.91) | 0.94 (0.91 – 0.95) | 8.26 (6.15 – 11.09)  | 0.54 (0.48 – 0.62) | 15.05 (11.03 – 20.52)  | 68.1% |
| <b>Moriarty et al., 2015 SR – RA group</b>          | 5  | 6,188  | 0.87 (0.77 – 0.93) | 0.87 (0.76 – 0.94) | 7.24 (3.74 – 14.03)  | 0.14 (0.08 - 0.25) | 49.31 (25.74 – 94.48)  | 55.1% |
| <b>Moriarty et al., 2015 SR Independent studies</b> | 26 | 13,164 | 0.76 (0.67 – 0.83) | 0.88 (0.85 – 0.91) | 6.72 (5.06 – 8.92)   | 0.26 (0.19 - 0.37) | 24.96 (14.81 – 42.08)  | 81.5% |

580

581 **Figure legends**

582 **Figure 1.** PHQ-9 algorithm scoring method summary ROC plot for the diagnosis of major depressive disorder in allegiant studies and non-  
 583 allegiant studies. Pooled sensitivity and specificity estimates using a bi-variate meta-analysis (*HSROC* hierarchical receiver-operating  
 584 characteristic).

1  
2  
3  
4  
5 585 Figure 2. PHQ-9 summed items scoring method at cut-off point 10 summary ROC plot for diagnosis of major depressive disorder in allegiant  
6 586 studies and non-allegiant studies. Pooled sensitivity and specificity estimates using a bi-variate meta-analysis (*HSROC* hierarchical receiver-  
7 587 operating characteristic).  
8  
9

10  
11 588

12  
13 589  
14  
15  
16  
17  
18  
19  
20  
21  
22  
23  
24  
25  
26  
27  
28  
29  
30  
31  
32  
33  
34  
35  
36  
37  
38  
39  
40  
41  
42  
43  
44  
45  
46  
47  
48  
49

For peer review only

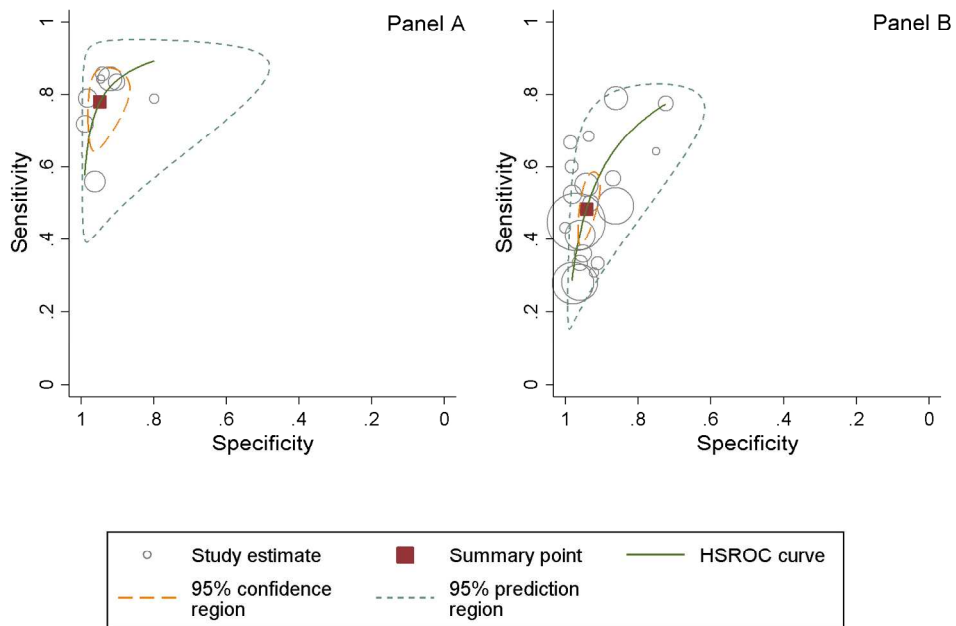

Figure 1. PHQ-9 algorithm scoring method summary ROC plot for the diagnosis of major depressive disorder in allegiant studies (Panel A) and non-allegiant studies (Panel B). Pooled sensitivity and specificity estimates using a bi-variate meta-analysis (HSROC hierarchical receiver-operating characteristic).

169x123mm (300 x 300 DPI)

1  
2  
3  
4  
5  
6  
7  
8  
9  
10  
11  
12  
13  
14  
15  
16  
17  
18  
19  
20  
21  
22  
23  
24  
25  
26  
27  
28  
29  
30  
31  
32  
33  
34  
35  
36  
37  
38  
39  
40  
41  
42  
43  
44  
45  
46  
47  
48  
49  
50  
51  
52  
53  
54  
55  
56  
57  
58  
59  
60

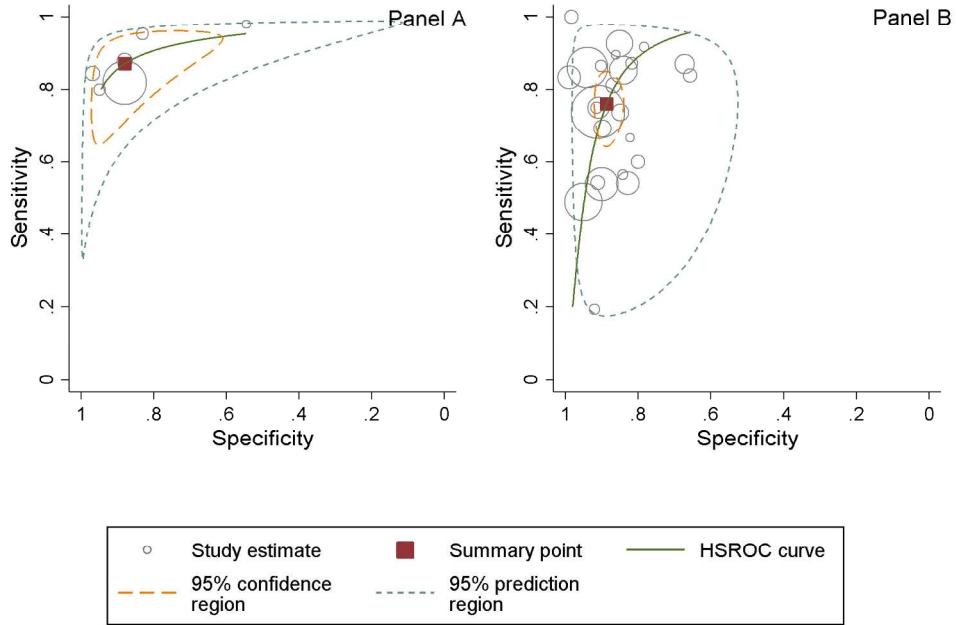

Caption : Figure 2. PHQ-9 summed items scoring method at cut-off point 10 summary ROC plot for diagnosis of major depressive disorder in allegiant studies (panel A) and non-allegiant studies (panel B). Pooled sensitivity and specificity using a bi-variate meta-analysis (HSROC hierarchical receiver-operating characteristic).

169x123mm (300 x 300 DPI)

1  
2  
3 **Appendices to:** Manea L, Boehnke JR, Gilbody S, Moriarty AS, McMillan D, Are there  
4 researcher allegiance effects in diagnostic validation studies of the PHQ-9? A systematic  
5 review and meta-analysis. Manuscript submitted for publication at BMJOpen.  
6  
7  
8  
9

10  
11 **Appendix 1: Search terms used in Embase, MEDLINE and PsycINFO**  
12  
13

14  
15  
16 (phq adj5 "9").ti,ab.  
17

18  
19 (phq adj5 item\$).ti,ab.  
20

21 (patient health questionnaire adj5 "9").ti,ab.  
22

23  
24 (patient health questionnaire adj5 item\$).ti,ab.  
25

26 (prime md adj5 "9").ti,ab.  
27

28  
29 (prime md adj5 item\$).ti,ab.  
30  
31  
32  
33  
34  
35  
36  
37  
38  
39  
40  
41  
42  
43  
44  
45  
46  
47  
48  
49  
50  
51  
52  
53  
54  
55  
56  
57  
58  
59  
60

## Appendix 2

**Figure 1: PRISMA flowchart - search and selection of included diagnostic accuracy studies for the systematic review of studies reporting diagnostic accuracy of the PHQ-9 at using the summed items scoring method (Manea et al, 2014)**

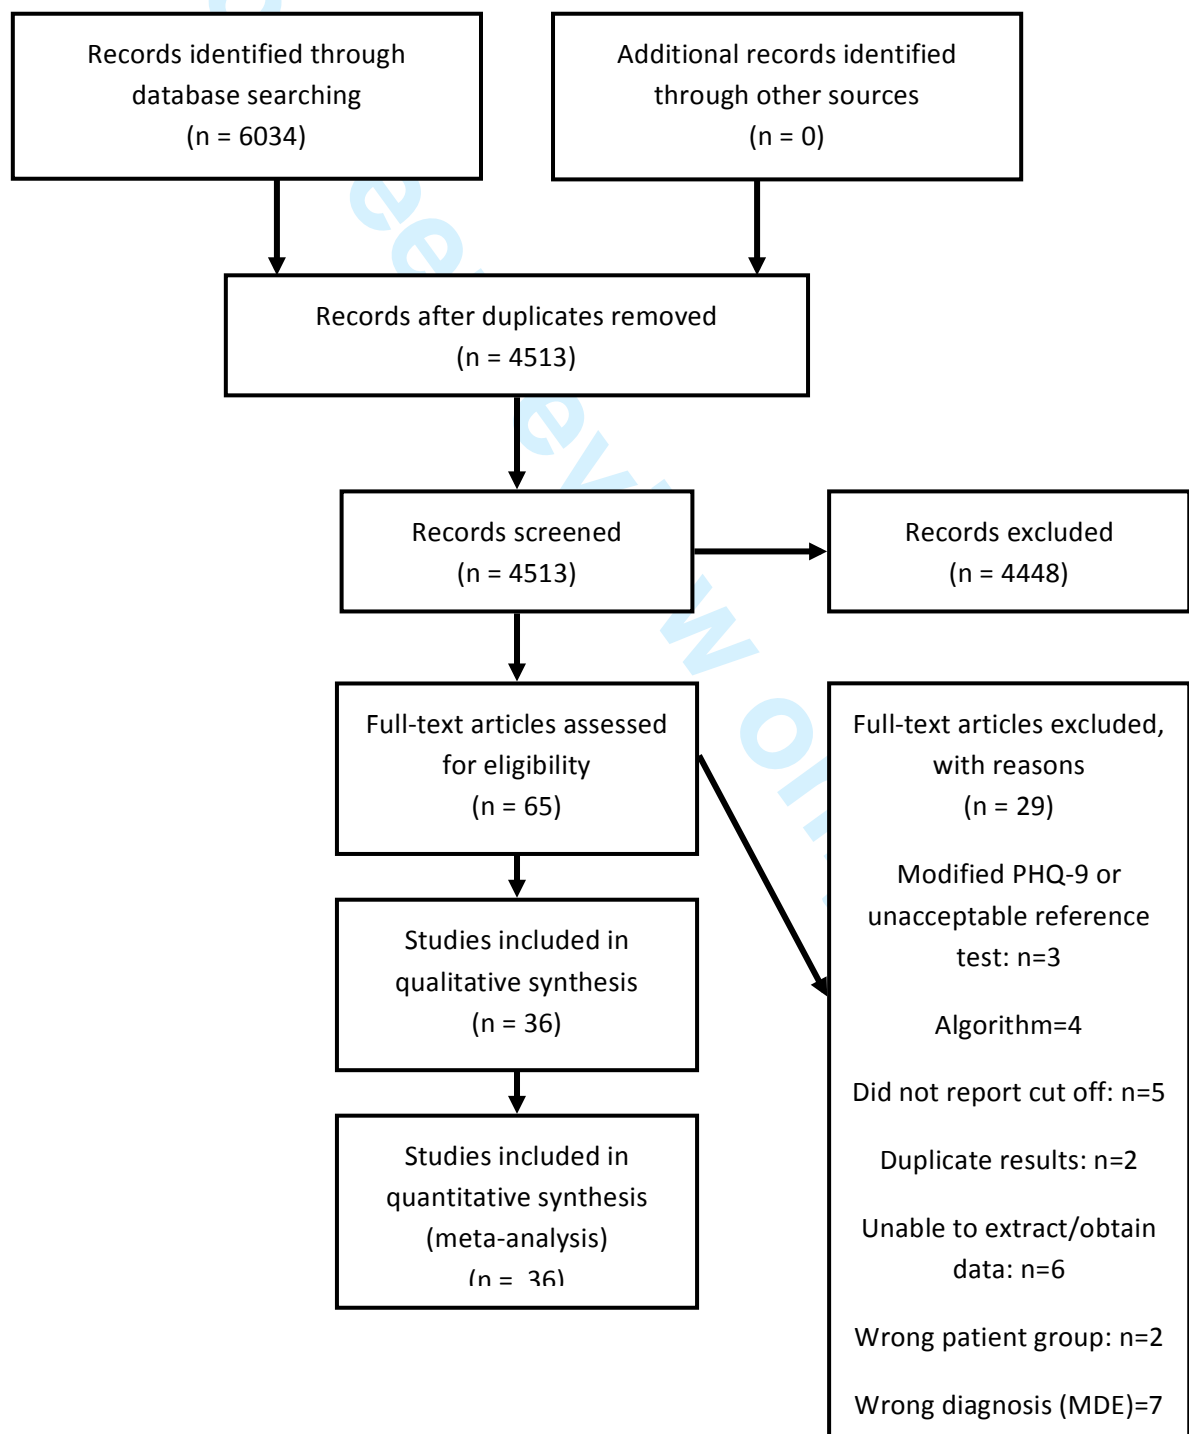

**Figure 2: PRISMA flowchart - search and selection of included diagnostic accuracy studies for the systematic review of studies reporting diagnostic accuracy of the PHQ-9 at using the algorithm scoring method (Moriarty et al., 2015)**

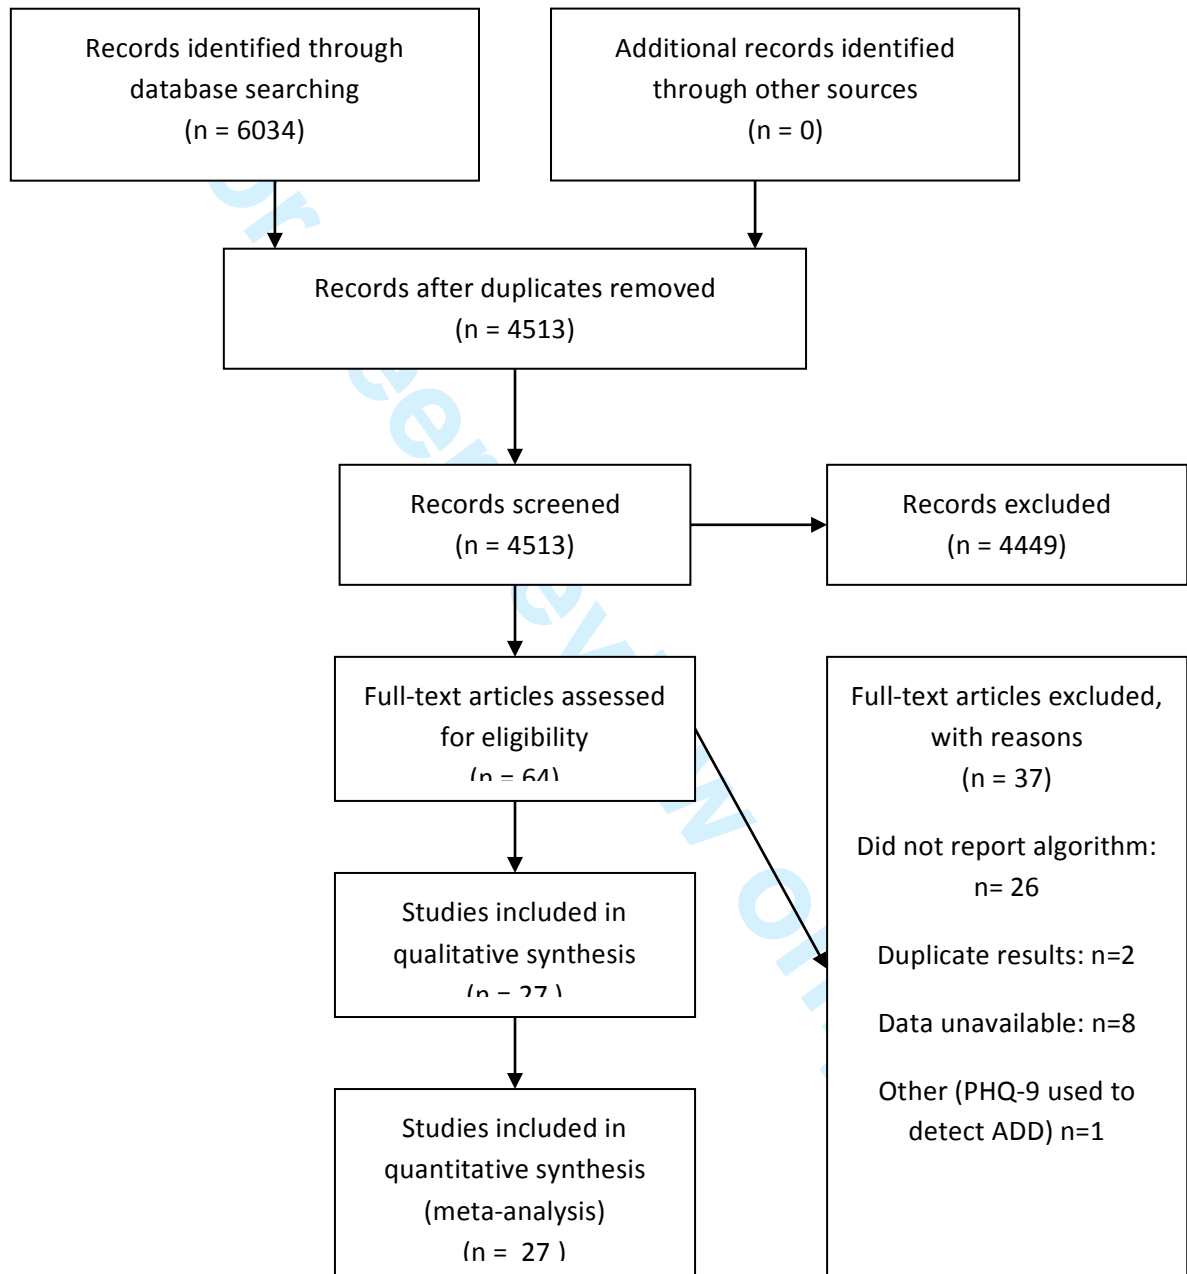



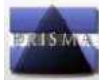

# PRISMA 2009 Checklist

1  
2  
3  
4  
5  
6  
7  
8  
9  
10  
11  
12  
13  
14  
15  
16  
17  
18  
19  
20  
21  
22  
23  
24  
25  
26  
27  
28  
29  
30  
31  
32  
33  
34  
35  
36  
37  
38  
39  
40  
41  
42  
43  
44  
45  
46  
47  
48  
49

| Section/topic                      | #  | Checklist item                                                                                                                                                                                                                                                                                              | Reported on page #                                               |
|------------------------------------|----|-------------------------------------------------------------------------------------------------------------------------------------------------------------------------------------------------------------------------------------------------------------------------------------------------------------|------------------------------------------------------------------|
| <b>TITLE</b>                       |    |                                                                                                                                                                                                                                                                                                             |                                                                  |
| Title                              | 1  | Identify the report as a systematic review, meta-analysis, or both.                                                                                                                                                                                                                                         | 1                                                                |
| <b>ABSTRACT</b>                    |    |                                                                                                                                                                                                                                                                                                             |                                                                  |
| Structured summary                 | 2  | Provide a structured summary including, as applicable: background; objectives; data sources; study eligibility criteria, participants, and interventions; study appraisal and synthesis methods; results; limitations; conclusions and implications of key findings; systematic review registration number. | 2                                                                |
| <b>INTRODUCTION</b>                |    |                                                                                                                                                                                                                                                                                                             |                                                                  |
| Rationale                          | 3  | Describe the rationale for the review in the context of what is already known.                                                                                                                                                                                                                              | 4-5                                                              |
| Objectives                         | 4  | Provide an explicit statement of questions being addressed with reference to participants, interventions, comparisons, outcomes, and study design (PICOS).                                                                                                                                                  | 5                                                                |
| <b>METHODS</b>                     |    |                                                                                                                                                                                                                                                                                                             |                                                                  |
| Protocol and registration          | 5  | Indicate if a review protocol exists, if and where it can be accessed (e.g., Web address), and, if available, provide registration information including registration number.                                                                                                                               | No                                                               |
| Eligibility criteria               | 6  | Specify study characteristics (e.g., PICOS, length of follow-up) and report characteristics (e.g., years considered, language, publication status) used as criteria for eligibility, giving rationale.                                                                                                      | 5                                                                |
| Information sources                | 7  | Describe all information sources (e.g., databases with dates of coverage, contact with study authors to identify additional studies) in the search and date last searched.                                                                                                                                  | 5                                                                |
| Search                             | 8  | Present full electronic search strategy for at least one database, including any limits used, such that it could be repeated.                                                                                                                                                                               | Available online (see Manea et al., 2015; Moriarty et al., 2015) |
| Study selection                    | 9  | State the process for selecting studies (i.e., screening, eligibility, included in systematic review, and, if applicable, included in the meta-analysis).                                                                                                                                                   | 5                                                                |
| Data collection process            | 10 | Describe method of data extraction from reports (e.g., piloted forms, independently, in duplicate) and any processes for obtaining and confirming data from investigators.                                                                                                                                  | 6                                                                |
| Data items                         | 11 | List and define all variables for which data were sought (e.g., PICOS, funding sources) and any assumptions and simplifications made.                                                                                                                                                                       | 5-6                                                              |
| Risk of bias in individual studies | 12 | Describe methods used for assessing risk of bias of individual studies (including specification of whether this was done at the study or outcome level), and how this information is to be used in any data synthesis.                                                                                      | 6                                                                |

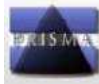

# PRISMA 2009 Checklist

|                      |    |                                                                                                                                                           |   |
|----------------------|----|-----------------------------------------------------------------------------------------------------------------------------------------------------------|---|
| Summary measures     | 13 | State the principal summary measures (e.g., risk ratio, difference in means).                                                                             | 6 |
| Synthesis of results | 14 | Describe the methods of handling data and combining results of studies, if done, including measures of consistency (e.g., $I^2$ ) for each meta-analysis. | 6 |

Page 1 of 2

| Section/topic                 | #  | Checklist item                                                                                                                                                                                           | Reported on page # |
|-------------------------------|----|----------------------------------------------------------------------------------------------------------------------------------------------------------------------------------------------------------|--------------------|
| Risk of bias across studies   | 15 | Specify any assessment of risk of bias that may affect the cumulative evidence (e.g., publication bias, selective reporting within studies).                                                             | 6, 21              |
| Additional analyses           | 16 | Describe methods of additional analyses (e.g., sensitivity or subgroup analyses, meta-regression), if done, indicating which were pre-specified.                                                         | 6                  |
| <b>RESULTS</b>                |    |                                                                                                                                                                                                          |                    |
| Study selection               | 17 | Give numbers of studies screened, assessed for eligibility, and included in the review, with reasons for exclusions at each stage, ideally with a flow diagram.                                          | Appendix           |
| Study characteristics         | 18 | For each study, present characteristics for which data were extracted (e.g., study size, PICOS, follow-up period) and provide the citations.                                                             | Tables 1 and 2     |
| Risk of bias within studies   | 19 | Present data on risk of bias of each study and, if available, any outcome level assessment (see item 12).                                                                                                | Tables 3 and 4     |
| Results of individual studies | 20 | For all outcomes considered (benefits or harms), present, for each study: (a) simple summary data for each intervention group (b) effect estimates and confidence intervals, ideally with a forest plot. | N/A                |
| Synthesis of results          | 21 | Present results of each meta-analysis done, including confidence intervals and measures of consistency.                                                                                                  | Table 5            |
| Risk of bias across studies   | 22 | Present results of any assessment of risk of bias across studies (see Item 15).                                                                                                                          | Tables 3 and 4     |
| Additional analysis           | 23 | Give results of additional analyses, if done (e.g., sensitivity or subgroup analyses, meta-regression [see Item 16]).                                                                                    | 11 and 17          |
| <b>DISCUSSION</b>             |    |                                                                                                                                                                                                          |                    |
| Summary of evidence           | 24 | Summarize the main findings including the strength of evidence for each main outcome; consider their relevance to key groups (e.g., healthcare providers, users, and policy makers).                     | 17-21              |
| Limitations                   | 25 | Discuss limitations at study and outcome level (e.g., risk of bias), and at review-level (e.g., incomplete retrieval of identified research, reporting bias).                                            | 21                 |
| Conclusions                   | 26 | Provide a general interpretation of the results in the context of other evidence, and implications for future research.                                                                                  | 21-22              |
| <b>FUNDING</b>                |    |                                                                                                                                                                                                          |                    |

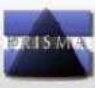

# PRISMA 2009 Checklist

1  
2  
3  
4  
5  
6  
7  
8  
9  
10  
11  
12  
13  
14  
15  
16  
17  
18  
19  
20  
21  
22  
23  
24  
25  
26  
27  
28  
29  
30  
31  
32  
33  
34  
35  
36  
37  
38  
39  
40  
41  
42  
43  
44  
45  
46  
47  
48  
49

|         |    |                                                                                                                                            |    |
|---------|----|--------------------------------------------------------------------------------------------------------------------------------------------|----|
| Funding | 27 | Describe sources of funding for the systematic review and other support (e.g., supply of data); role of funders for the systematic review. | 23 |
|---------|----|--------------------------------------------------------------------------------------------------------------------------------------------|----|

*From:* Moher D, Liberati A, Tetzlaff J, Altman DG, The PRISMA Group (2009). Preferred Reporting Items for Systematic Reviews and Meta-Analyses: The PRISMA Statement. PLoS Med 6(6): e1000097. doi:10.1371/journal.pmed1000097

For more information, visit: [www.prisma-statement.org](http://www.prisma-statement.org).

Page 2 of 2

For peer review only
