# Supplementary material for: Are there researcher allegiance effects in diagnostic validation studies of the PHQ-9? A systematic review and meta-analysis
Source: PubMed Central journal article supplement (PMC5640143; doi:10.1136/bmjopen-2016-015247), 2017-09-29

**Appendices to:** Manea L, Boehnke JR, Gilbody S, Moriarty AS, McMillan D, Are there researcher allegiance effects in diagnostic validation studies of the PHQ-9? A systematic review and meta-analysis. Manuscript submitted for publication at BMJOpen.

**Appendix 1: Search terms used in Embase, MEDLINE and PsycINFO**

(phq adj5 "9").ti,ab.

(phq adj5 item\$).ti,ab.

(patient health questionnaire adj5 "9").ti,ab.

(patient health questionnaire adj5 item\$).ti,ab.

(prime md adj5 "9").ti,ab.

(prime md adj5 item\$).ti,ab.

## Appendix 2

**Figure 1: PRISMA flowchart - search and selection of included diagnostic accuracy studies for the systematic review of studies reporting diagnostic accuracy of the PHQ-9 at using the summed items scoring method (Manea et al, 2014)**

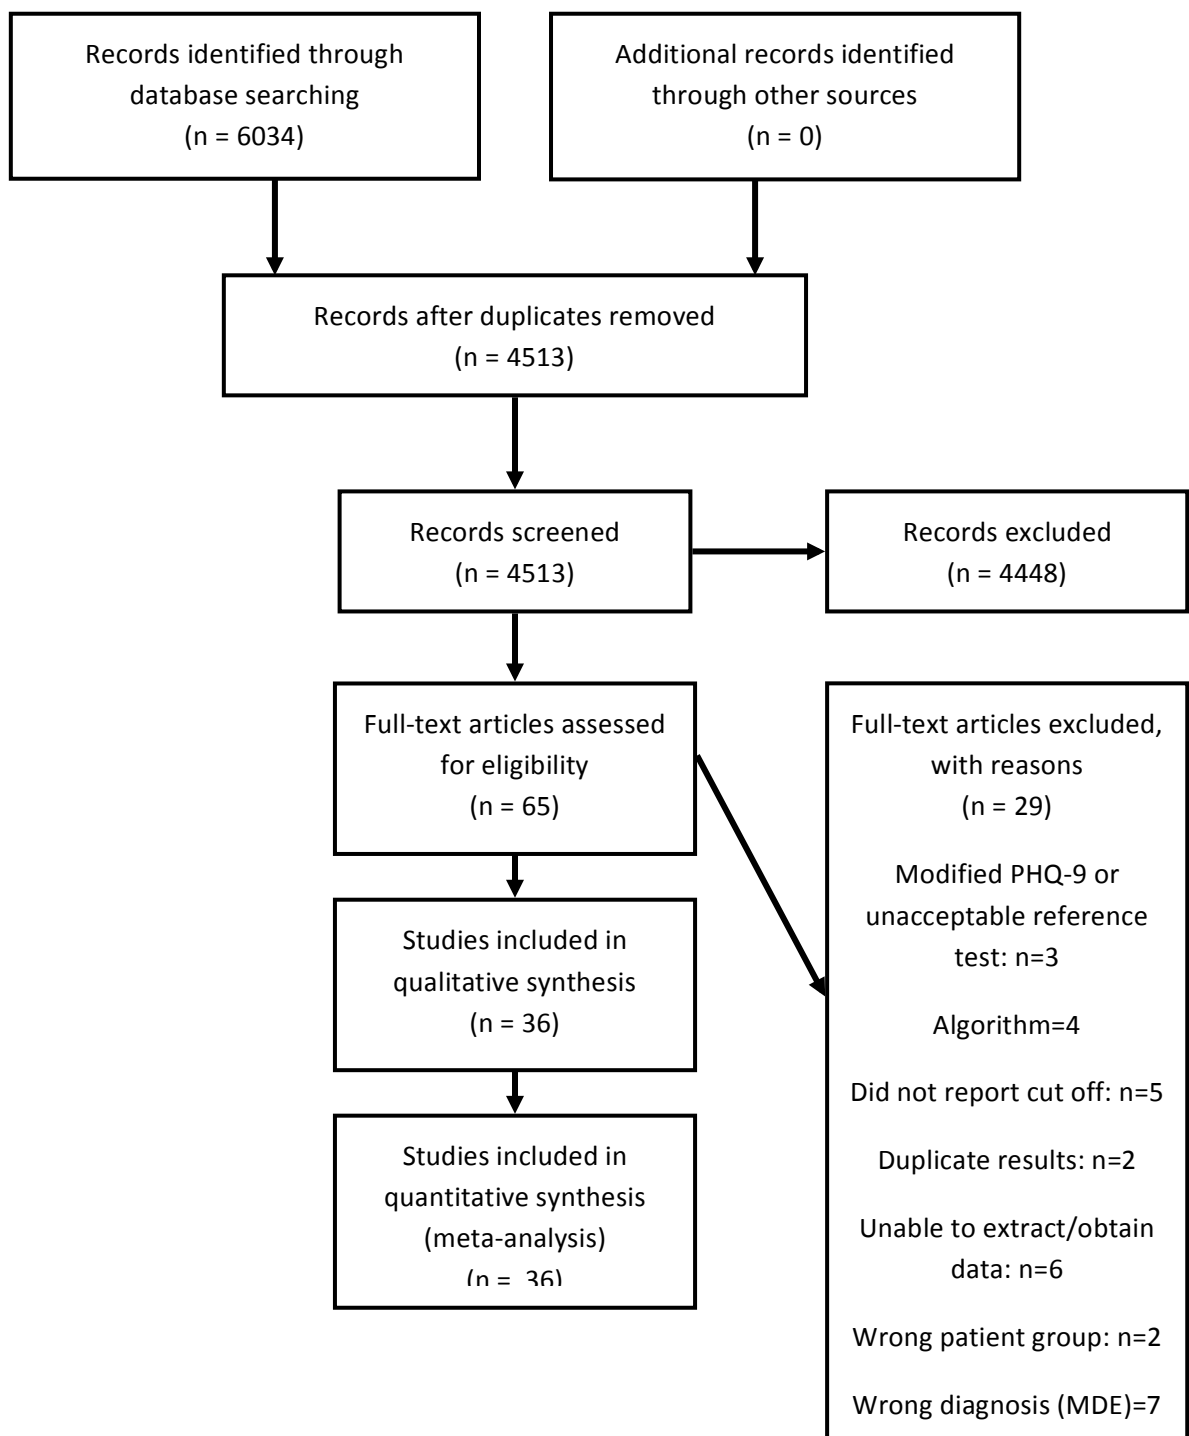

**Figure 2: PRISMA flowchart - search and selection of included diagnostic accuracy studies for the systematic review of studies reporting diagnostic accuracy of the PHQ-9 at using the algorithm scoring method (Moriarty et al., 2015)**

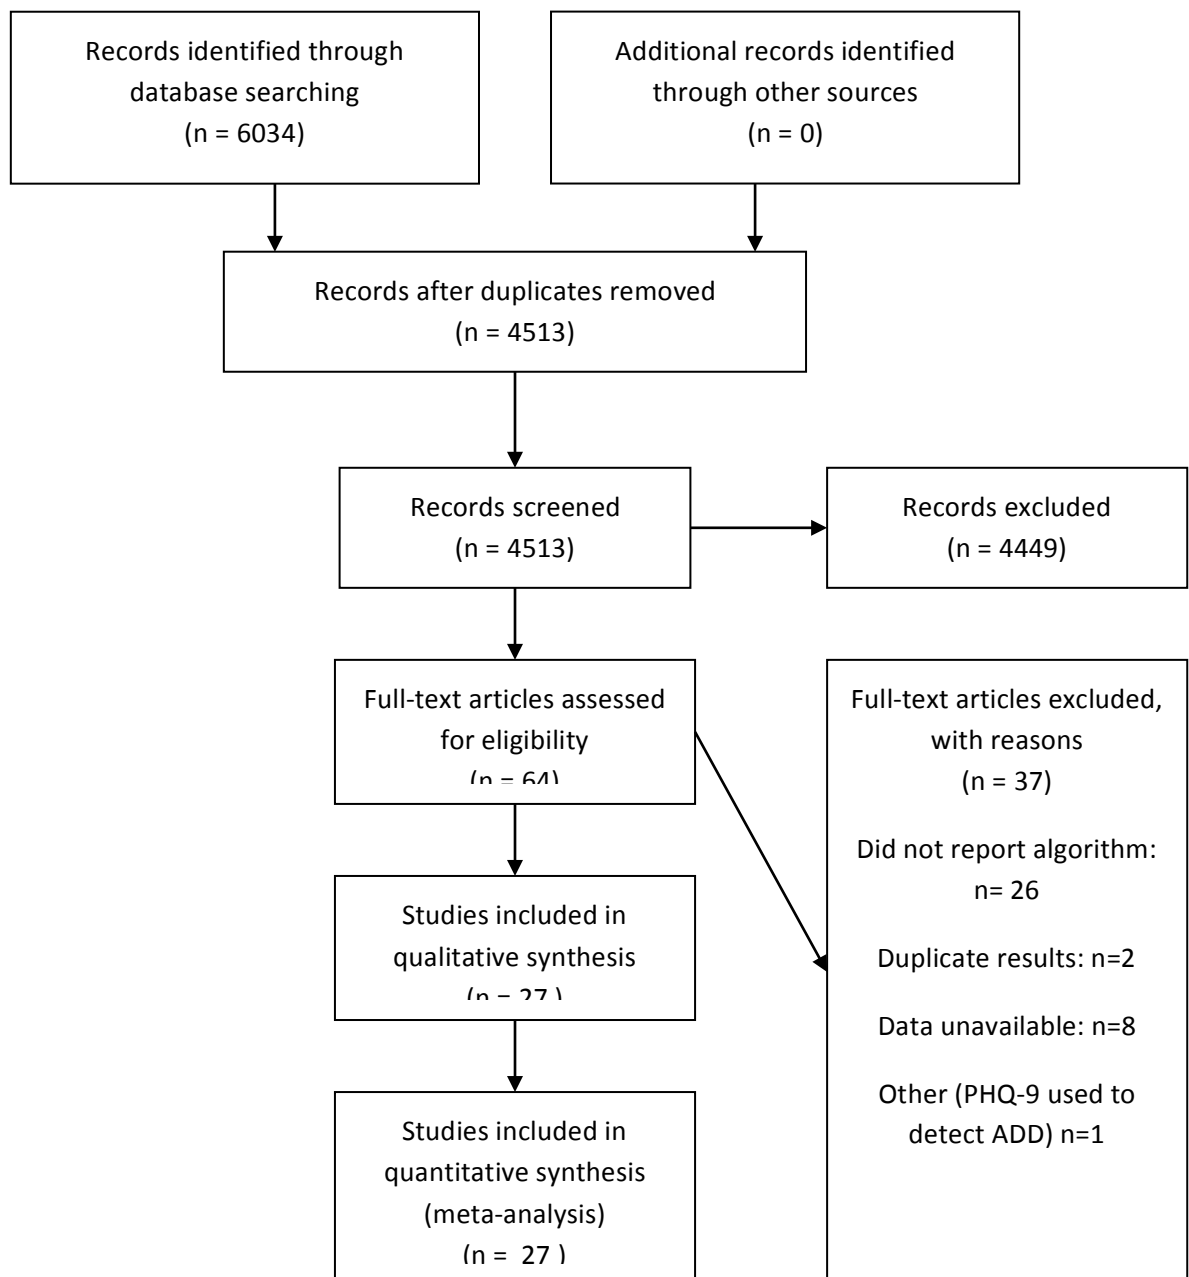

Supplement: bmjopen-2016-015247supp001.pdf [file bmjopen-2016-015247supp001.pdf]
